# Supplementary material
Source: publisher figshare collection journal article supplement (https://gsajournals.figshare.com/ndownloader/files/26610305)
Supplement: Supplementary file 1 [file 26610305]

## Sheet: Sheet1
Dataset S1 (separate file). Raw and Normalized Read Counts (.xlsx workbook). Gene and transcript read count matrix generated via Ballgown and normalized (TMM) via EdgeR. Each row represents a different gene/transcript (Col. A) and Col. D – Col. R represent raw/normalized read counts for that gene/transcript associated with each of the 15 RNAseq samples. Corresponding LOC # and gene names have als…

## Sheet: raw_gene_count_matrix
gene_id	LOC#	gene name	F1_1	F1_2	F1_3	F1_4	F1_YA	F2_1	F2_2	F2_3	F2_4	F2_YA	F3_1	F3_2	F3_3	F3_4	F3_YA
MSTRG.29	#N/A	#N/A	508838	732596	460825	1288161	884993	571829	603791	547972	1831316	939378	463966	769978	312292	1835881	914420
MSTRG.9640	LOC100574365	elongation factor 1-alpha-like	398590	491866	347383	280887	317919	349638	402029	366745	255084	309565	399961	377997	409393	236056	314996
MSTRG.7994	LOC100159411	ADP/ATP translocase 3-like	300053	317035	201363	166044	195277	258287	234593	204505	158191	203448	286594	231807	208320	155198	160892
MSTRG.6600	LOC100159065	heat shock 70 kDa protein cognate 4-like	257281	307848	207529	143506	177024	230777	237307	216032	108133	216083	260858	214950	262911	106838	173190
MSTRG.15832	LOC100169280	actin	249218	171217	23082	10644	87623	209950	80325	27587	17104	90652	363430	112143	22670	8129	50151
MSTRG.4572	Catb-16a	cathepsin B-16A	225168	12694	15196	5804	5359	152806	51267	23772	16387	7367	171273	106056	50646	7910	9265
MSTRG.15369	LOC100160736	heat shock protein 83-like	223472	336524	329841	416569	327711	185357	295503	332986	372865	214695	231277	294575	307680	333433	288444
MSTRG.9869	LOC100168198	elongation factor 2-like	215102	260873	175959	114780	143325	192341	207368	189456	102715	132375	207884	182695	205912	90753	149566
MSTRG.17514	Cprr1-8	RR1 cuticle protein 8	197090	184150	24620	7118	11701	174692	71534	31611	3626	9168	264446	104370	22082	4702	18413
MSTRG.15301	LOC100169122	glyceraldehyde-3-phosphate dehydrogenase-like	195416	204341	129177	133098	127657	161080	145952	133810	132514	131699	192272	143561	112888	126619	113495
MSTRG.7549	LOC100144869	ATP synthase c-subunit-like	176389	183661	104272	83828	102086	158993	137334	110232	83444	114743	184105	149181	107945	76362	94409
MSTRG.13912	Rpl22	ribosomal protein L22	160786	204233	149667	120474	137342	136888	163861	142653	105948	118602	164026	183560	179079	96552	118260
MSTRG.7191	Atpsyn-beta	ATP synthase-beta (EC:3.6.3.14)	145110	150695	91409	91298	90943	127884	117191	96848	91927	95640	137042	108988	90017	78488	89273
MSTRG.5271	LOC100167736	uncharacterized LOC100167736	142867	185489	22078	5307	9616	169938	77167	33099	3697	11780	255692	102944	24311	3655	13653
MSTRG.6964	LOC100169457	tubulin alpha chain-like	140855	196822	239431	209518	223574	125932	186262	229476	180499	133973	161644	184555	250640	156594	193178
MSTRG.1064	LOC100164072	cytochrome P450 4g15-like	138847	110330	88028	39144	39504	159503	155155	89469	35356	104144	130870	112192	103719	32510	54515
MSTRG.6117	LOC100159229	ATP synthase subunit alpha, mitochondrial-like	132243	131413	84358	91631	87182	115200	106030	91403	93309	89825	120603	93918	77125	79432	81473
MSTRG.1075	LOC100161577	collagen alpha-1(IV) chain-like	131835	145300	51376	32683	49519	131403	94768	68361	27579	39833	111528	83444	46417	29016	66650
MSTRG.20000	LOC100145822	actin	130330	172809	143428	167637	83712	79894	85645	92672	154870	80125	90150	75818	100747	130377	87453
MSTRG.6238	LOC100167366	60S ribosomal protein L4-like	109532	135385	104782	110235	102830	91476	116512	112779	101497	86876	109471	116762	128670	94931	102860
MSTRG.8887	LOC100163734	uncharacterized LOC100163734	108033	112949	70419	80796	93246	98981	99386	66018	79737	170869	98963	93877	63621	85230	74220
MSTRG.18265	LOC100162441	60S ribosomal protein L5-like	106768	126172	128500	163431	151424	92368	116542	132829	165010	90833	105622	124682	127930	150693	147038
MSTRG.8327	LOC100166785	uncharacterized LOC100166785	105312	140632	91277	53069	74030	93622	120066	96683	47533	78266	111886	122700	122822	43246	74959
MSTRG.18013	LOC100164819	enolase-like	102207	118571	73789	79252	70280	85279	88122	81838	78064	74778	90266	71740	59084	73672	66238
MSTRG.10	COX1	cytochrome c oxidase subunit I	101954	150369	85286	247790	126499	114353	121704	112711	300987	121325	97185	121593	59726	255203	163995
MSTRG.9052	LOC100159585	polyadenylate-binding protein 1-like	101634	119017	96859	82632	89602	89927	95985	96676	76090	72875	96259	91476	88625	67332	76024
MSTRG.8852	LOC100168765	60S ribosomal protein L3-like	100625	129357	110162	95933	98960	88052	105054	109352	88607	68795	99986	108277	124065	78003	88942
MSTRG.16106	LOC100161248	eukaryotic initiation factor 4A	99259	118238	120743	137310	129842	83497	103202	123680	136396	88188	97159	100056	118536	115264	114638
MSTRG.21630	LOC100166754	ribosomal protein L7Ae-like	97687	122575	118250	134394	127157	83123	107252	118961	125109	91187	96137	111326	122578	117179	110647
MSTRG.5656	LOC100163169	40S ribosomal protein SA-like	96815	114401	102530	78957	94812	78963	103847	99604	67802	77243	95351	104412	118741	65350	82365
MSTRG.8048	LOC100167255	fatty acid synthase-like	93915	128132	56983	49423	33653	78107	86745	68749	47566	19221	79238	64691	56900	44305	41530
MSTRG.11733	LOC100158660	40S ribosomal protein S4-like	93560	111864	89625	77394	74542	78760	99909	95439	65139	75487	88825	98153	113093	63994	85297
MSTRG.13051	LOC100158873	uncharacterized protein LOC100158873	93012	157333	87311	67941	91854	60327	100741	114975	67690	209286	79243	99612	62232	97414	41155
MSTRG.18435	LOC100167379	#N/A	92227	62458	11110	5292	50391	79481	34356	11474	15812	75494	110922	38161	7476	4935	36432
MSTRG.18350	LOC100168039	serpin B11-like	90859	132307	41902	26502	6592	66189	73866	45527	22087	4209	68488	63412	26788	32297	5327
MSTRG.8065	LOC100167532	40S ribosomal protein S2-like	89868	115581	90859	52598	74144	78904	98702	88958	45630	71306	95066	108166	127025	39497	72803
MSTRG.16549	Rps6	ribosomal protein S6	89081	110062	114329	142748	132479	75249	97176	118622	144672	84974	93349	105900	109236	133343	126389
MSTRG.10963	LOC100167446	60S ribosomal protein L8-like	88481	114118	108846	102678	116178	75763	100378	106523	98814	80813	88176	107336	120215	90007	97075
MSTRG.13804	LOC100167299	ornithine decarboxylase-like	88348	101078	49326	43428	39667	74837	69473	52267	41865	44508	75054	61497	35209	43615	41727
MSTRG.8880	LOC100164214	uncharacterized LOC100164214	87411	113925	53850	74444	54876	74150	80166	59709	75008	53817	72763	69138	38756	77794	60495
MSTRG.9487	Rplp0	ribosomal protein LP0	87082	98986	100057	102248	103267	70898	89396	99967	99402	64095	85895	95219	94607	86013	89398
MSTRG.8029	Rpl15	ribosomal protein L15	86261	111661	101097	76187	99911	75010	96956	94258	72447	67988	90039	104224	114521	62854	72219
MSTRG.21688	Rpl7	ribosomal protein L7	86074	99017	97126	121922	114766	69460	86667	100267	120414	71730	84745	93380	96664	112618	107032
MSTRG.5001	LOC100166128	fructose-bisphosphate aldolase-like	85551	77720	43337	50611	54351	73736	56745	46079	53010	91574	81823	54913	40024	51040	42419
MSTRG.18471	LOC100159045	ribosomal protein L23-like	83389	107473	94853	82162	96238	71188	89291	91925	75213	67197	85020	99235	103084	70413	74944
MSTRG.12651	LOC100159410	40S ribosomal protein S9-like	83237	108291	110887	127235	112858	70233	93156	111815	120654	82914	84411	101717	106485	111798	111961
MSTRG.19623	LOC100162386	peptidyl-prolyl cis-trans isomerase-like	82892	110760	113540	136633	117874	71966	97764	115644	135736	57786	85504	107273	103327	118256	104561
MSTRG.16372	LOC100162475	probable citrate synthase 1, mitochondrial-like	82170	90516	43779	39246	45792	69462	63020	47576	36604	55162	77618	56879	43730	32514	40687
MSTRG.10782	LOC100169243	uncharacterized LOC100169243	81202	32893	4967	2897	7101	99626	25619	7406	3452	3591	106902	38392	10019	2451	3588
MSTRG.21270	Tub1	tubulin beta-1	80085	121959	149654	153202	142137	72644	108505	142293	142589	89749	91510	100192	148861	117092	122328
MSTRG.7257	LOC100166426	fatty acid synthase-like	79997	64942	26902	25050	21265	81234	49493	16684	25673	19015	47779	47028	21037	24671	26037
MSTRG.12299	Rps3a	ribosomal protein S3A	79937	96400	97590	109680	112543	67430	86923	96284	108907	61359	80660	94357	95572	98871	93608
MSTRG.11451	LOC100163341	ribosomal protein L10Ae-like	79452	99026	99059	112616	118420	66335	86543	101780	108598	79107	79826	93298	99897	101898	100024
MSTRG.4922	Gs2	glutamine synthetase 2, GS	78964	79145	44880	21912	25885	70765	65873	53697	19998	46499	84606	60017	38450	31187	37880
MSTRG.24809	LOC100574469	heat shock 70 kDa protein cognate 4-like	78605	95447	68725	55814	73539	71038	76323	69102	46354	83323	84996	81062	85987	48573	62317
MSTRG.6480	LOC100164654	elongation factor 1-gamma-like	78556	86582	66958	64932	68577	69226	71507	71628	61057	55158	78853	72417	69181	57801	68476
MSTRG.12688	LOC100160215	40S ribosomal protein S5-like	77527	96191	100199	112654	116207	65536	85139	98598	109942	74164	82301	97204	104621	100146	97149
MSTRG.9379	LOC100167382	60S ribosomal protein L17-like	77270	98585	97348	86329	103039	63425	85565	93462	82317	70431	81209	99778	102236	76996	81057
MSTRG.5797	LOC100165315	ribosomal protein L13-like	76745	88076	81893	72978	87387	62242	78561	80357	69152	59237	75781	80405	84574	60738	65500
MSTRG.21961	LOC100164050	60S ribosomal protein L6-like	76591	85366	90892	97164	94346	62623	72358	95007	94951	59099	77623	85558	91449	83212	85405
MSTRG.17901	Rpl10	ribosomal protein L10 (EC:3.6.5.3)	76074	96749	86722	70780	84148	65322	81328	83443	61264	68278	79723	90075	102212	60768	78001
MSTRG.14121	LOC100165109	ribosomal protein L19e-like	75698	95281	81576	64582	77508	61553	82981	79095	58008	63701	74166	86327	82910	54545	62569
MSTRG.14141	Samdc	S-adenosylmethionine decarboxylase	75318	43881	19021	18995	14322	38681	27035	20957	17865	19108	34813	23871	22678	19229	17143
MSTRG.20519	LOC100163081	guanine nucleotide-binding protein subunit beta-like protein-like	74842	99176	75898	58975	67022	65197	79913	75692	54993	57532	79790	88145	92268	50203	67560
MSTRG.1892	LOC100161442	transketolase-like protein 2-like	73701	64878	32840	31951	30664	56034	45698	37451	30395	41838	64132	40421	27066	28212	28520
MSTRG.17908	LOC100162480	60S ribosomal protein L13a-like	70901	94463	73552	45388	65355	62095	78248	73949	39382	64823	76401	88754	100083	35777	63210
MSTRG.18302	LOC100166082	spermidine synthase-like	70464	73742	26833	14485	16497	59783	44422	33350	12353	19333	64440	43685	24995	15360	16514
MSTRG.5626	LOC100159449	40S ribosomal protein S23-like	70155	93973	95611	106994	113107	61325	80442	98632	104380	75247	75138	94885	100476	101222	102020
MSTRG.5281	LOC100164538	uncharacterized LOC100164538	69903	124322	21861	7179	16530	71078	47682	27546	4446	9065	108208	63593	20050	5153	24909
MSTRG.8490	LOC100163274	troponin T-like	69269	37244	7995	4393	32676	53817	20173	7103	8091	33419	79916	28643	5266	4176	15418
MSTRG.3131	LOC100168809	Ornithine aminotransferase	69207	68662	36797	32855	18036	63308	66009	37297	40427	19044	85957	63779	38070	28334	20212
MSTRG.8625	Rpl27a	ribosomal protein L27a	67527	80994	79558	85245	85448	55104	68603	80144	82486	60366	68192	81446	75475	82273	84545
MSTRG.17511	LOC100169171	cuticular protein-like	66637	49986	13772	5086	24215	64175	31639	18758	3636	13809	109296	36761	13200	3197	18215
MSTRG.20055	LOC100165750	ATP-dependent RNA helicase p62-like	65917	82313	82174	70455	89842	61862	72479	83476	60046	110167	60243	60432	101129	57090	77384
MSTRG.17556	Atpcl	ATP citrate lyase (EC:2.3.3.8)	65503	71014	41245	39534	32666	53859	47182	45067	37417	18867	45829	42372	37298	34551	34042
MSTRG.19552	LOC100169357	neurofilament heavy polypeptide	64931	66100	48232	29330	36129	63519	50361	48754	28650	27505	56927	45043	49847	26001	30354
MSTRG.9757	LOC100161533	pyruvate kinase-like	64229	62412	44153	47628	40093	51284	47526	48057	44992	40495	55163	42462	43391	40538	38960
MSTRG.9323	Rps10b	ribosomal protein S10b	63390	77914	71760	56458	74256	52476	65746	67078	54508	57538	63535	73651	83993	48667	55581
MSTRG.9597	Rps18	ribosomal protein S18	63284	75416	69027	59802	73292	54124	63729	68428	55485	53419	63578	72779	71063	51894	61178
MSTRG.19287	LOC100169386	fatty acid desaturase-like	63228	64478	39295	47407	47159	54868	45560	40459	45250	42843	53222	40249	33643	41706	39164
MSTRG.5648	LOC100167271	possible pseudogene or miscRNA, No KEGG entry	62232	75092	59716	47796	70214	55520	57347	56479	42715	63216	70473	63102	71663	40538	51107
MSTRG.20276	LOC100158822	voltage-dependent anion-selective channel-like	61469	60119	44903	49412	48103	53765	49109	43733	50733	37880	58090	49769	40454	44857	41065
MSTRG.16235	LOC100165074	myosin light chain-like	61003	31397	7492	5494	39840	47615	18287	6897	16243	44001	72971	24493	4474	6161	23940
MSTRG.20934	LOC100165946	60S ribosomal protein L18-like	60570	69381	64289	44608	63167	49366	59191	58426	41304	44828	59939	64564	69218	36674	46316
MSTRG.7534	LOC100164630	uncharacterized LOC100164630	60145	27676	16513	22085	18428	55005	28705	19651	26058	26229	71417	41387	32057	20212	20165
MSTRG.6015	LOC100168081	ribosomal protein L35Ae-like	59861	80644	55539	33083	47168	51415	62835	53726	28403	56521	66680	71887	83697	25298	45610
MSTRG.7684	LOC100144789	DnaJ-like	57978	68016	59085	64660	66665	53747	55731	58918	58170	70441	56814	53684	63023	58250	59343
MSTRG.21607	Hsc70-3	heat shock protein cognate 3	57943	62602	49009	54080	55075	51755	56053	49798	48922	28910	53998	48294	47918	42220	50834
MSTRG.21400	LOC100162964	60S ribosomal protein L9-like	57510	66714	64025	60415	74521	47871	54819	63294	59740	49595	56555	61788	60391	54917	59308
MSTRG.17962	Rpl24	ribosomal protein L24	56537	66126	57946	48415	59175	46464	55938	56444	45303	43207	57125	58895	65278	40322	45495
MSTRG.17447	Rps17	ribosomal protein S17	56533	67208	65330	72581	75494	46704	58136	68082	71005	47910	55853	66244	64281	67090	65783
MSTRG.18195	LOC100161842	uncharacterized LOC100161842	56497	75387	78653	104373	75056	48598	69542	82272	103420	46988	54990	72121	72956	92425	76373
MSTRG.10130	LOC100161429	uncharacterized LOC100161429	56214	58747	44346	32165	36298	49110	54148	45898	27106	27262	47540	57055	49902	25312	34884
MSTRG.18394	LOC100160909	uncharacterized LOC100160909	55846	53738	40280	30756	33271	46253	53698	36269	34867	33835	56631	51625	32921	29577	24417
MSTRG.12050	LOC100158866	40S ribosomal protein S8-like	55183	67410	65778	72423	73506	46478	59610	66279	72762	47100	55225	64966	64349	65648	60920
MSTRG.18513	LOC100160266	40S ribosomal protein S8-like	55070	65184	63356	69445	69662	44708	58293	63212	69729	44973	53681	62998	62137	63040	58578
MSTRG.8233	LOC100168780	40S ribosomal protein S24-like	54847	64331	63084	88397	80016	44823	55387	67556	91182	50450	54257	62830	57687	86393	78133
MSTRG.8215	LOC100160340	ribosomal protein S19e-like	54605	70247	72674	89182	85521	46412	61518	73269	91239	55292	56697	70719	70583	84256	79909
MSTRG.13642	LOC100159571	ribosomal protein S15A-like	53995	68469	68595	77871	80677	44734	58341	68599	73617	58937	57398	67794	70786	73352	72730
MSTRG.19308	LOC100161399	calreticulin-like	53693	60555	44317	56436	61307	45328	51476	47207	50628	24804	50535	49915	41914	47228	54517
MSTRG.18906	Rpl18a	ribosomal protein L18A	53558	68083	65596	79892	72352	45223	59475	68724	78080	46003	56725	64411	65179	73729	75769
MSTRG.17975	LOC100164058	s-adenosylmethionine synthase-like	53493	59852	27982	20879	26111	47110	35859	28619	16986	29642	43104	29156	26146	17489	24913
MSTRG.16228	Rps3	ribosomal protein S3	53421	69955	68827	76683	73468	45186	59188	68470	73668	50325	55634	65791	64776	70220	65653
MSTRG.18997	LOC100161508	uncharacterized LOC100161508	53274	39465	10155	3926	15930	61809	20423	13639	5938	4985	39642	26833	13410	4163	18596
MSTRG.21834	LOC100145825	#N/A	52473	62042	37695	43946	45490	46800	42830	41264	42835	35232	49599	42414	33311	40907	37607
MSTRG.21035	Nlp	nucleoplasmin	52218	71812	69844	54155	56361	41528	63784	69545	47291	39482	48906	61922	73787	43033	52138
MSTRG.1074	LOC100163579	collagen alpha-5(IV) chain	52171	63490	21218	13562	22389	49464	41899	29521	11748	18210	48219	35506	17850	13073	25961
MSTRG.10184	LOC100572810	60S ribosomal protein L26-like	50906	62710	59416	68488	74056	42014	52623	60930	59142	47435	52112	62955	56520	58786	57138
MSTRG.20702	S1	sucrase	50624	13964	8085	7668	3255	41576	26352	10417	7468	6286	46181	24970	22433	6263	3612
MSTRG.7995	LOC100169293	staphylococcal nuclease domain-containing protein 1-like	50539	72229	52201	40478	37110	51164	53951	57186	37688	25545	53703	47405	56107	30208	41376
MSTRG.20039	LOC100167924	ribosomal protein S13e-like	50273	67763	55307	35969	48845	43193	58275	53766	31209	44081	54696	61663	66781	29820	43392
MSTRG.9092	Rpl27	ribosomal protein L27 (EC:3.6.5.3)	50208	65030	65471	87443	83077	42893	56141	67544	91598	52928	52966	64044	58823	87607	77753
MSTRG.16611	LOC100161976	phosphate carrier protein, mitochondrial-like	49873	46263	33586	32403	30808	43314	35613	34282	29923	27806	47303	40473	35014	29093	31658
MSTRG.9636	LOC100163748	heat shock 70 kDa protein cognate 4-like	49441	72301	61890	44422	40000	43609	70619	67652	36552	31330	50759	62534	85125	30432	44628
MSTRG.18054	LOC100169246	elongation factor 1-beta	49153	60647	52741	56598	66650	42191	48352	52960	49996	50557	50193	53255	53951	49722	52803
MSTRG.5543	LOC100169524	hexokinase type 2-like	48969	55147	16385	9907	11004	46476	29155	16968	8576	24979	39027	20322	12386	7979	18019
MSTRG.12317	Rpl14	ribosomal protein L14	48901	63612	64012	88970	83248	40463	54296	66180	92318	50795	51523	64948	58701	84342	74921
MSTRG.14306	LOC100167791	6-phosphogluconate dehydrogenase, decarboxylating	48737	47321	24981	20682	16754	39273	36077	29070	20796	20452	44020	33074	20151	19323	17729
MSTRG.20869	LOC100169422	40S ribosomal protein S7-like	48258	65409	53096	44188	48822	43367	55128	52426	40621	42899	50963	59241	61821	37403	46483
MSTRG.12146	LOC100164957	ornithine decarboxylase antizyme 1-like	48205	56072	35367	41457	38554	40455	41195	37317	40879	32695	46718	38237	31477	37229	36386
MSTRG.15204	LOC100167508	ribosomal protein L11e-like	46741	56712	52623	52096	52593	39419	50818	54099	51797	32292	47515	53153	49987	46759	51870
MSTRG.12510	Vha16	V-type proton ATPase 16 kDa proteolipid subunit (EC:3.6.3.14), active transporters; vacuolar H+-ATPase; hypothetical protein	46294	46200	23939	17868	17939	42456	36182	25223	15617	14566	46792	33366	25899	13327	19851
MSTRG.19743	LOC100158923	zinc finger protein-like	45387	58240	45824	33587	43204	39419	47594	44201	31530	43351	48480	45209	51640	27408	35491
MSTRG.10714	LOC100144773	membrane alanyl aminopeptidase N	45193	13392	4092	2623	2608	36301	15596	5685	3203	4532	35624	15741	12360	2009	4257
MSTRG.20054	Rpl41	ribosomal protein L41	44866	56563	52004	43968	52309	36192	49106	52465	45482	28540	47421	58126	52111	43697	44225
MSTRG.11210	Rps11	ribosomal protein S11	44413	55541	57677	53892	63897	37543	50890	57039	52127	46940	46522	56939	57397	48852	59830
MSTRG.13578	LOC100167156	ribosomal protein L36-like	44309	57358	54458	63639	65661	36718	49744	55190	61755	41832	46731	55816	57261	60263	57442
MSTRG.5096	14-3-3zeta	14-3-3 protein zeta	43850	55085	35944	27860	30120	39848	44553	38605	25265	26748	45659	40688	41722	22079	33096
MSTRG.16068	LOC100165540	protein extra bases-like	43685	52944	51987	67958	49531	37606	47833	56422	69182	24916	41053	44399	46348	55971	50808
MSTRG.18182	Bic	bicaudal	43544	53946	53281	69668	56220	35336	49401	55056	68898	32326	42592	47053	48108	59142	49538
MSTRG.20237	LOC100161355	v-type proton ATPase catalytic subunit A-like, active transporters; similar to ATPase	43214	36604	21132	22394	17407	37991	31301	23586	23246	9568	36864	25014	19562	16699	18881
MSTRG.16174	Rps26	ribosomal protein S26	42909	53869	51861	47084	56422	36347	47565	49972	47294	34430	45464	53549	58708	41863	44253
MSTRG.5661	LOC100161259	acetyl-CoA acetyltransferase, cytosolic-like	42678	14468	5523	5849	3240	32278	14848	10359	10049	3819	30599	16763	10255	6530	4853
MSTRG.7310	LOC100165466	ribosomal protein L35e-like	42574	52618	50343	65588	64176	35345	44489	52226	64909	39351	42226	54249	45765	64222	58506
MSTRG.7216	Rpl40	ribosomal protein L40	42487	58465	54640	69342	60594	37529	28425	58631	67064	41350	47595	54285	51411	63628	60747
MSTRG.12535	LOC100159536	ribosomal protein L44e-like	42445	51746	50838	70085	67550	35476	45282	52552	76090	41693	41130	51120	44993	70617	61057
MSTRG.11052	LOC100168431	ribosomal protein S20-like	42199	50017	48323	51781	55471	34458	42928	49651	50985	36162	42351	47991	52887	47742	46163
MSTRG.20713	LOC100160111	probable maltase L-like	42106	17465	5184	2999	3457	38005	15857	8354	4919	2747	45922	18668	9224	2640	3086
MSTRG.5199	LOC100144893	ribosomal protein L30-like protein	41581	53766	54188	69157	65042	36523	46104	54810	68621	43068	45321	53430	50439	67420	61235
MSTRG.8060	LOC100158857	fatty acid synthase-like	41159	27726	6750	3751	9565	29547	17514	6815	4469	4734	38617	14816	4808	2899	6598
MSTRG.15876	LOC100159647	paramyosin, long form-like	41116	27954	6097	3155	20029	36439	15509	5801	6548	14471	49872	17656	3382	2898	13338
MSTRG.16884	LOC100163620	stress-70 protein, mitochondrial	41064	38712	29767	34303	26137	33275	35511	31032	32599	15850	33775	30168	29080	26208	26326
MSTRG.9489	LOC100169216	40S ribosomal protein S16-like	40985	49553	51483	70065	63333	34505	42693	52475	75990	40802	41835	50588	46125	68088	59827
MSTRG.19594	Rpl31	ribosomal protein L31	40908	50812	52039	69118	65769	34212	42478	52777	71304	39030	42627	50630	48933	66417	58637
MSTRG.15376	Awd2	abnormal wing discs 2	40496	49632	55609	57452	62579	35284	46068	54988	54719	41660	38680	53014	58725	49687	51357
MSTRG.20292	Rpl37	ribosomal protein L37	40327	49312	48759	59049	60825	33443	41717	48945	58551	39240	42187	50494	48301	58374	53035
MSTRG.17463	Rpl12	ribosomal protein L12	40075	50218	49228	64840	60142	33424	43382	51861	68617	37851	39829	47601	44687	65133	57551
MSTRG.16025	LOC100168563	60 kDa heat shock protein, mitochondrial-like	39836	39268	29530	29157	25820	31732	34328	31336	29859	14416	33137	31098	27395	20795	21123
MSTRG.6781	LOC100166220	uncharacterized LOC100166220	39722	55378	24135	22625	29421	35605	34486	27210	20981	24882	42164	29889	22385	21158	24600
MSTRG.15924	LOC100159778	glycogen phosphorylase-like	39656	57432	20514	13338	12025	33604	40840	33388	11992	13972	39680	29239	18331	13392	13509
MSTRG.1254	LOC100144909	mitochondrial ATP synthase gamma-subunit	39648	36872	24587	24992	29951	34993	29216	25530	27220	28993	37128	30955	24168	24099	24289
MSTRG.13909	Rpl34	ribosomal protein L34	39644	57351	57969	63914	56034	33355	45868	52377	63705	35749	46389	51418	55647	62101	58124
MSTRG.7634	LOC100164760	uncharacterized LOC100164760	39205	40755	6729	2746	359	37555	14534	6357	1837	112	38933	24418	7414	1766	372
MSTRG.4961	LOC100164777	fatty acid synthase-like	39158	35028	11927	9259	3510	41567	24427	6220	9645	1486	23690	23320	11530	9156	2532
MSTRG.7764	Rps12	ribosomal protein S12	38783	50894	52091	68585	63304	32444	44208	53214	69921	40401	41012	51103	48409	66808	61701
MSTRG.8157	Nap1l1	nucleosome assembly protein 1-like 1	38744	44909	40154	63960	36240	33663	37619	43033	62178	27266	35442	34954	38318	56192	51738
MSTRG.10354	Dcxr	dicarbonyl/L-xylulose reductase (EC:1.1.1.10)	38457	32764	21898	23230	23731	31656	28263	20554	22197	13635	34030	27770	22098	18888	17336
MSTRG.21554	LOC100164800	#N/A	38037	43632	44657	56507	40830	30284	42424	47157	55114	19821	31256	42335	42479	49017	40152
MSTRG.5174	Idgf	imaginal disk growth factor	37943	44854	17880	10890	17529	33683	31091	23293	8943	29498	40484	25706	17031	10181	15327
MSTRG.993	LOC100164739	acetyl-CoA carboxylase-like	37617	42972	20502	14102	11726	30894	31773	22941	12824	10665	31972	21923	16365	12679	13304
MSTRG.6558	Rps14	ribosomal protein S14	37319	47681	49278	58699	63030	31247	41545	47358	59181	39208	38354	48145	45731	54668	48262
MSTRG.19693	LOC100165309	eukaryotic translation initiation factor 3 subunit A-like	37022	43908	40101	28227	30400	30105	41772	38863	24877	22093	32460	42191	44856	22173	30193
MSTRG.13007	Mlc1	myosin alkali light chain 1	36991	19950	3515	1810	15109	29142	9429	3727	4535	27034	48922	15748	3193	1723	8936
MSTRG.19888	LOC100144895	cytochrome c-like protein	36737	32469	23139	26322	31509	32746	26313	23980	26555	29246	35010	29410	24166	26717	25970
MSTRG.7073	LOC100164244	elongation of very long chain fatty acids protein AAEL008004-like	36718	29298	16153	14444	10116	37072	24695	10055	16796	6693	25136	30503	11502	17320	11006
MSTRG.21021	Naca	nascent polypeptide-associated complex subunit alpha (EC:5.3.99.3)	36715	46643	43497	47768	44128	30193	42181	43880	48406	25445	36006	42354	42884	41290	38117
MSTRG.19870	LOC100165746	aminopeptidase N-like	36668	16294	9418	7680	4963	28148	19920	9811	9491	5747	29987	19333	12348	6618	6534
MSTRG.9545	#N/A	#N/A	36609	39245	26044	26489	22646	28024	35774	24270	28881	16143	35732	29930	16788	23799	18160
MSTRG.15956	LOC100167557	ribosomal protein P2-like	36555	44945	42435	46009	50501	29579	37672	40756	45352	32997	37277	43435	39499	42205	38284
MSTRG.13570	LOC100165759	60S ribosomal protein L21-like	35987	45349	45446	42015	49657	30318	39997	44110	38364	38002	36726	44779	45617	37585	42172
MSTRG.19487	Nop56	nucleolar KKE/D repeat protein Nop56	35953	46102	49396	61171	48424	31015	45770	52347	60615	25219	33598	46523	52353	53033	46059
MSTRG.15784	LOC100168004	uncharacterized LOC100168004	35532	55918	68033	102695	72942	31742	50635	74648	98479	38141	33272	42196	57965	79991	79974
MSTRG.4037	LOC100165786	elongation factor 1-alpha-like	35374	40190	25252	9760	15122	29084	32516	28245	7459	16571	29310	22288	32632	5580	18198
MSTRG.22021	LOC100165459	polyubiquitin-A-like	35262	43882	19747	20545	20278	32822	34791	26175	18621	38033	42936	31886	27412	28540	25328
MSTRG.11003	LOC100162105	pyruvate carboxylase, mitochondrial	34610	31656	14371	11818	9214	29082	24019	16945	12607	7527	28083	20060	12936	11292	9745
MSTRG.9013	Rpl28	ribosomal protein L28 (EC:3.6.5.3)	34214	45144	45121	64325	52821	28979	40359	47340	69409	28860	35689	45176	40692	61289	54360
MSTRG.230	LOC100161272	peroxiredoxin 1-like	34192	38125	31933	35396	33640	29372	27931	33031	45139	22982	38417	34744	31019	32570	31727
MSTRG.16022	Rpl32	ribosomal protein L32	34034	47712	47489	51063	79097	40466	57468	47248	49092	52937	52707	45058	48524	44304	46782
MSTRG.16034	LOC100161587	mitochondrial-processing peptidase subunit beta-like	33969	34120	19947	15488	17140	30500	26662	20814	14293	23070	32276	24844	20242	13501	17297
MSTRG.8058	LOC100160920	fatty acid synthase-like	33830	23427	5082	2245	7247	27097	14593	5092	2456	3544	34424	12574	4469	1619	4826
MSTRG.17476	LOC100161030	transitional endoplasmic reticulum ATPase TER94-like	33742	43600	39984	31517	34510	31303	40792	40804	27525	21112	31487	34025	48599	21564	31509
MSTRG.8407	LOC100161663	tropomyosin-like	33661	24214	9742	12961	28562	25852	14388	12033	14347	19139	38893	17613	8979	10027	17520
MSTRG.19466	Rpl39	ribosomal protein L39	33541	44609	44422	62230	55816	28855	37245	45717	71262	33302	34941	43956	51940	61579	52241
MSTRG.17306	LOC100572714	v-type proton ATPase subunit B-like	33493	26669	18075	21458	18395	29694	24348	18203	23135	9659	30734	21892	17057	17993	19075
MSTRG.7944	LOC100168864	peptidyl-prolyl cis-trans isomerase FKBP1A-like	33221	46756	48352	55546	54083	27910	39953	48822	54313	33800	35726	45467	46726	50818	45752
MSTRG.16320	Phgdp	D-3-phosphoglycerate dehydrogenase; PHGDH	33218	30604	20859	23282	17799	25666	25812	18919	24314	12171	31882	26645	18655	22346	18080
MSTRG.5424	LOC100159033	cuticle protein-like	33122	30903	35454	26564	24549	24496	32931	27917	28840	21276	33723	28165	21461	25105	20803
MSTRG.17917	LOC100160720	UDP-glucose pyrophosphorylase 2-like	33083	45159	21497	26026	22941	28252	28212	27347	26466	28425	28123	22717	16052	30435	23371
MSTRG.7900	Rps27-1	ribosomal protein S27-1	32953	44044	41426	49122	48140	27637	36807	44128	45935	34845	35292	43396	39620	46533	49567
MSTRG.12428	LOC100169442	probable aconitate hydratase, mitochondrial-like	32726	26149	15081	17966	24380	27970	23597	17771	19201	26535	28189	21399	17296	15746	19297
MSTRG.18274	Ran	GTP-binding nuclear protein Ran	32443	42335	48336	67224	44867	27503	39796	52642	67002	25711	32292	40314	46214	56812	52896
MSTRG.15878	LOC100165804	triosephosphate isomerase-like	32289	31962	20792	24929	22399	27704	24834	21654	27576	18500	29612	24760	17693	24571	21246
MSTRG.12997	LOC100160294	#N/A	32266	45219	55988	92939	72081	28714	41212	59793	93233	44651	31585	48669	53898	86564	67913
MSTRG.23300	LOC100169540	aminopeptidase N-like	32023	9118	2659	2168	2248	25392	10455	4077	2972	3719	27197	13086	8520	1703	3055
MSTRG.5114	LOC100168232	apolipoprotein D-like	31760	16447	4262	5730	15608	32591	8054	4411	6109	3465	21171	11693	3750	5959	13076
MSTRG.5752	ACYPI50196	#N/A	31528	14216	4759	1165	794	20047	11923	5470	1374	211	22880	11285	2657	1586	1057
MSTRG.9544	#N/A	#N/A	31326	34586	20918	23913	20053	24011	30533	21063	25120	18688	31551	26278	14418	21482	17995
MSTRG.19209	LOC100168822	uncharacterized LOC100168822	31248	18956	1367	683	2853	32905	7097	1510	722	1742	36575	14282	1883	412	1826
MSTRG.14122	LOC100144894	ribosomal protein P2-like	31078	40466	39129	46107	49262	25573	34194	39915	45006	32570	32984	41235	37186	44729	40103
MSTRG.7153	LOC100169631	60S ribosomal protein L29-like	30910	41282	39024	53084	47055	25865	35923	42068	54839	27048	33312	40736	36681	51165	46921
MSTRG.8107	LOC100163008	cytochrome b-c1 complex subunit 2, mitochondrial-like	30778	29025	18089	15928	17894	26897	23217	18358	15588	19843	28573	20649	18357	13695	14836
MSTRG.19569	LOC100161407	ribosomal protein S30-like	30755	26549	25348	43312	33704	25844	25531	25366	42031	24181	19270	24305	29972	30878	28477
MSTRG.5266	LOC100159488	DNA topoisomerase 1-like	30668	35886	32839	47215	41500	27215	30495	34963	47665	28900	27596	34693	32492	46099	41607
MSTRG.17524	LOC100167046	probable phosphoglycerate kinase-like	30659	29151	21989	19106	19116	24886	26087	22162	18639	17221	27618	23873	21351	16255	16754
MSTRG.11357	LOC100167473	venom carboxylesterase-6-like	30560	25050	17414	10444	2234	28998	23084	14145	10742	776	23343	23765	16445	10095	4671
MSTRG.12790	LOC100158668	uncharacterized protein LOC100158668	30550	42054	42977	66578	46567	25616	40162	47565	70345	23521	29881	42808	36289	63324	50162
MSTRG.16631	LOC100163010	NADP-dependent malic enzyme	30474	25487	14839	15254	13308	28747	21862	14922	15313	14993	25369	18587	16385	13778	12719
MSTRG.21126	LOC100159849	protein wos2-like	30471	41312	36069	37307	29166	25883	36616	35201	35126	20626	27849	33140	35522	31653	28165
MSTRG.18253	LOC100165126	active transporters; putative vacuolar ATP synthase subunit E; hypothetical protein	30448	24193	14991	18800	17066	25641	21807	15728	18994	10100	30511	21002	14869	16632	17188
MSTRG.19000	LOC100159472	osiris 6-like	29856	26787	6728	4661	10660	34662	13458	8925	4279	5521	24696	15075	8565	3053	12342
MSTRG.17915	LOC100158834	ATP synthase subunit b, mitochondrial-like	29801	28401	19766	22914	22874	25613	22884	20903	25364	20638	27893	22061	18271	20139	19237
MSTRG.19048	LOC100167769	calcium-transporting ATPase sarcoplasmic/endoplasmic reticulum type-like	29597	22164	11573	7944	11921	23945	17058	12171	7011	8939	27377	15110	11385	5005	11281
MSTRG.17049	LOC100162886	importin-7-like	29549	31459	26792	36023	28239	25926	27249	29623	34873	19479	25848	24866	23587	30186	28342
MSTRG.5902	LOC100159342	malate dehydrogenase, cytoplasmic-like	29452	27468	20523	23406	20339	24419	25249	21477	23670	15547	28176	21436	18760	22831	18949
MSTRG.15411	LOC100166325	uncharacterized LOC100166325	29372	46134	54737	74078	57525	24810	40104	56636	67271	36946	25007	33834	46745	56818	58600
MSTRG.11089	Rpl37a	ribosomal protein L37A	29337	36561	33811	43521	40427	24239	30190	35370	44223	24700	29523	35813	28514	43159	40319
MSTRG.10218	LOC100162366	protein LSM14 homolog A-like	29312	25893	19970	29757	24653	24872	19849	21432	27583	15991	20562	17840	18874	22917	22374
MSTRG.9693	LOC100169007	thioredoxin-like	29227	32936	27306	33598	34565	25868	25030	28527	32554	32612	30533	26169	25611	31137	30161
MSTRG.16483	LOC100160550	active transporters; similar to CG32580 CG32580-PA	29173	25784	15150	16730	24147	31999	24546	11970	17866	31039	30827	23187	15303	20135	23507
MSTRG.7925	Rps25-2	ribosomal protein S25 homolog 2	29038	38384	38232	51704	47887	24944	33692	40005	55403	28052	31148	37155	34918	52625	44585
MSTRG.21574	LOC100166950	uncharacterized LOC100166950	28910	30947	11290	2329	3057	30848	24518	18358	1436	6342	53563	24673	10852	1415	6526
MSTRG.15961	LOC100163455	heat shock 70 kDa protein 4L-like	28904	35959	35611	33743	31699	25223	35645	35980	32078	18925	27618	33052	37413	27256	28246
MSTRG.12914	LOC100166333	60S acidic ribosomal protein P1-like	28629	36215	33086	25259	36695	24078	30879	31631	23904	25325	30713	34553	39024	22182	25289
MSTRG.18643	LOC100158980	40S ribosomal protein S29-like	28341	34887	33616	33582	39219	22847	29548	32028	34027	28609	30317	35618	36013	34159	31142
MSTRG.19537	LOC100160598	uncharacterized LOC100160598	28229	18257	4737	4073	4720	23892	10424	4283	3743	2375	17622	9524	3863	3061	4484
MSTRG.19169	LOC100168075	ribosomal protein S15-like	28196	36177	34610	31332	35468	23903	29879	32790	31405	19519	29892	36532	35409	27870	27785
MSTRG.9668	LOC100158698	cytochrome c oxidase polypeptide IV-like	28107	27409	18568	16810	20044	25127	22953	18048	17355	19612	26430	23652	18677	15009	16331
MSTRG.6241	LOC100161103	possible pseudogene or miscRNA, No KEGG entry	28080	35529	24230	20209	19522	23345	30222	26901	16284	17673	27268	26779	31440	15069	20831
MSTRG.5321	LOC100160293	phosphoglucomutase-like	28013	35370	12730	9568	10081	22161	23003	19308	8269	13673	24319	17680	10034	9932	12556
MSTRG.23058	LOC103311752	#N/A	28002	40770	21180	31984	29291	22331	28704	26875	33411	32957	26340	24552	15912	33349	27013
MSTRG.19251	LOC100160702	solute carrier family 2, facilitated glucose transporter member 1-like	27851	31751	20672	12369	13551	24176	22534	20267	11065	12451	21936	20091	25135	8730	14466
MSTRG.7476	LOC100160983	chromodomain-helicase-DNA-binding protein Mi-2 homolog	27776	42414	56428	75083	62063	24769	39749	55734	71762	42115	26925	39803	54084	69304	54626
MSTRG.24582	LOC100569694	possible pseudogene or miscRNA, No KEGG entry	27740	11591	1311	735	3281	25443	5332	1868	528	1007	40753	13271	2033	619	1452
MSTRG.6139	LOC100169556	40S ribosomal protein S7-like	27689	33711	33271	36779	38555	24471	28052	34616	33093	30884	29580	31648	33907	34046	36808
MSTRG.24345	Tor	carotene dehydrogenase	27557	29306	8227	6123	8046	21072	20224	10945	4904	1671	24736	18117	6453	6424	7855
MSTRG.24312	#N/A	#N/A	27517	24000	10561	71604	85423	21377	400405	16150	99696	618753	18992	1435	33400	1079476	27287
MSTRG.15775	LOC100163260	upstream activation factor subunit spp27-like	27409	44184	53741	55750	46393	23063	42224	53368	52544	26285	26348	38974	50465	46789	46341
MSTRG.16227	LOC100162322	eukaryotic translation initiation factor 3 subunit C-like	27231	35592	34137	35806	30880	23171	32321	33505	33763	16850	26198	32833	34666	31683	29285
MSTRG.20773	LOC100168270	gamma-interferon-inducible lysosomal thiol reductase-like	27164	26935	21278	24692	20302	23723	25133	22202	28045	13626	26109	21227	19562	22087	19473
MSTRG.7344	Cct5	chaperonin containing TCP1, subunit 5 (epsilon)	27095	30943	37047	44756	34618	22013	32086	37178	43923	17476	23473	28077	35190	34939	32728
MSTRG.18060	LOC100169187	uncharacterized LOC100169187	27075	56040	79298	85533	76397	23330	51109	79998	81754	57476	30057	52172	82475	74602	73051
MSTRG.18993	LOC100163560	uncharacterized LOC100163560	26797	18707	3078	10208	16223	31276	9673	3788	11408	8974	17389	11370	4112	7666	19189
MSTRG.15153	LOC100145824	fatty acid desaturase	26752	25669	17213	19652	22038	23801	18902	17613	19363	22426	22998	15861	15036	17540	19797
MSTRG.15743	LOC103310418	#N/A	26711	40006	42752	46046	47788	25236	34132	43238	39599	35988	28431	29991	47520	33656	43105
MSTRG.9459	Atp5o	ATP synthase, H+ transporting, mitochondrial F1 complex, O subunit (EC:3.6.3.14)	26616	23202	16964	21472	20291	22592	19248	17050	23491	16798	24360	19806	15280	20449	19517
MSTRG.18300	LOC100159560	Cystathionase-like	26445	31800	11247	5546	6328	20148	17277	12209	4869	2314	24910	16494	7680	5332	6554
MSTRG.17712	LOC100169050	uncharacterized LOC100169050	26062	33292	36901	70433	64101	25699	30134	42993	73615	58920	25027	32648	33576	72952	58239
MSTRG.19369	LOC100162135	regucalcin-like	25907	12819	6131	4013	4451	28460	13057	6544	5754	4603	29912	17909	13066	3431	4771
MSTRG.22106	LOC100165874	probable Bax inhibitor 1-like	25770	23696	17137	21255	25938	23659	19319	17098	21502	21762	25995	19080	17890	19957	21369
MSTRG.13530	Atpsyn-d	ATP synthase, subunit d	25699	23115	16588	16750	18034	20160	19188	16444	18062	17348	23589	17741	14299	16094	16246
MSTRG.8597	LOC100165751	muscle LIM protein Mlp84B-like	25681	14692	3282	1333	7662	23103	9346	3128	1239	2095	33574	11158	1608	1252	5077
MSTRG.13255	LOC100168968	cytosolic non-specific dipeptidase-like	25589	17781	10808	15154	11726	19407	15771	11305	16541	7208	22110	18308	9879	13888	12127
MSTRG.6142	LOC100169591	cytochrome c oxidase subunit 5B, mitochondrial (EC:1.9.3.1)	25407	24629	18945	21929	25101	22125	19952	19048	22494	22137	25297	21109	18839	20055	20477
MSTRG.12918	LOC100161763	ribosomal protein LP1-like	25319	33357	30228	22467	32861	21275	28110	29210	21613	23542	27215	31188	34442	20434	23597
MSTRG.19617	LOC100165054	lipoamide acyltransferase component of branched-chain alpha-keto acid dehydrogenase complex, mitochondrial-like	25301	27445	8537	4525	8159	21599	15844	10238	3734	7313	25538	15318	8692	4694	6134
MSTRG.10616	LOC100160792	succinate-semialdehyde dehydrogenase, mitochondrial-like	24809	12806	1921	3212	8025	5699	3433	2801	3231	3018	24821	17858	7708	3211	1490
MSTRG.8651	LOC100167340	uncharacterized LOC100167340	24730	30284	23432	22725	23013	23020	24618	24791	19154	26063	22076	22795	25980	17161	23367
MSTRG.20544	LOC100162733	Y-box protein Ct-p40-like	24728	32598	30273	28305	31006	21317	28780	31569	25110	24811	24542	25197	32559	21430	28667
MSTRG.11730	LOC100145833	mitochondrial ATP synthase F chain-like	24463	24585	17151	18589	20724	21426	20129	17166	20441	16484	25781	22179	15921	17117	16716
MSTRG.3515	LOC100164905	uncharacterized LOC100164905	24157	13240	3007	1579	15707	19734	7348	2895	3358	12575	29132	10908	1954	1327	8819
MSTRG.20412	LOC100164294	contactin-2-like	24039	19638	9865	15760	15306	22909	13509	9696	14870	5897	23832	14940	10688	13180	16314
MSTRG.6115	Eif3j	eukaryotic translation initiation factor 3, subunit J	23940	25846	24010	38622	31850	20149	23199	25872	40390	17755	23291	29506	21445	37469	30577
MSTRG.17815	LOC100165135	KH domain-containing protein C56G2.1-like	23734	26776	24721	35341	28406	20618	23106	26830	35912	19008	20465	24639	21376	32231	28508
MSTRG.12372	LOC100144913	diacetyl/L-xylulose reductase (EC:1.1.1.10)	23711	27023	15323	23040	21028	19887	18112	17812	19980	28703	27415	14135	23262	23771	16609
MSTRG.7959	LOC100169107	protein disulfide-isomerase-like	23623	22713	16163	20163	19966	21249	19141	17845	19953	9962	21764	15109	13570	15775	20600
MSTRG.8405	LOC100159612	tropomyosin-2-like	23585	16266	3366	2084	12936	19096	9027	2935	4671	6442	29243	9964	1542	1991	10102
MSTRG.18313	LOC100164044	uncharacterized LOC100164044	23533	22873	16028	14763	17030	19334	18219	15579	15158	14993	23645	19683	14598	13390	13297
MSTRG.8225	LOC100162473	40S ribosomal protein S21-like	23406	28708	26551	31926	31959	20010	25220	27582	32461	20496	24632	29374	24218	31038	30055
MSTRG.16041	LOC100166105	cytochrome c oxidase subunit Va-like	23224	23276	15995	14597	20449	19222	19000	16665	16125	16877	22425	20009	15354	13919	14706
MSTRG.15962	LOC100161411	translation initiation factor 5a-like	23220	26719	31920	39009	29968	21752	27017	30093	39033	18878	26390	26419	27679	32793	29548
MSTRG.972	LOC100166026	putative glycogen [starch] synthase-like	23175	26805	9012	5807	6222	19253	15468	11020	4666	5058	20487	14131	6023	6926	6473
MSTRG.7852	LOC100162512	heterogeneous nuclear ribonucleoprotein 87F-like	23052	36586	41246	38204	36798	19751	36959	41927	34818	16268	23859	33567	41533	27683	33351
MSTRG.17062	LOC100169501	multifunctional protein ADE2-like	23022	25307	17910	18234	13265	18342	21411	18369	17499	7705	22035	19111	14070	15803	13904
MSTRG.19382	LOC100163898	probable nucleolar GTP-binding protein 1-like	22999	26536	25520	30581	30019	21527	21936	26634	28108	24432	22114	20211	25910	25526	26190
MSTRG.8270	LOC100166586	v-type proton ATPase 116 kDa subunit a isoform 1-like	22862	17462	14149	14659	13316	20654	17598	14659	15265	8932	19842	15333	14189	12672	13645
MSTRG.5927	LOC100159934	molybdenum cofactor sulfurase-like	22734	16036	7631	8824	9218	23104	14249	8591	8575	8651	25000	13868	9117	7560	8907
MSTRG.12847	LOC100164054	maternal protein exuperantia-like	22598	16772	10119	12114	10495	17971	12324	9765	11121	6351	16473	12271	8882	9996	10832
MSTRG.9033	LOC100164598	protein disulfide-isomerase A3-like	22547	23531	24455	36341	31237	19996	22342	25056	36631	12558	22035	20444	21182	28478	30437
MSTRG.13984	LOC100165226	elongation factor 1-delta-like	22427	27222	25395	38700	33521	18700	23619	28210	40964	24193	22969	24536	23605	37019	33849
MSTRG.4976	Cprr1-1	RR1 cuticle protein 1	22289	27204	14312	3649	7035	23968	29230	20290	2125	8935	67296	23982	14015	2425	8459
MSTRG.12015	LOC100168477	uncharacterized LOC100168477	22250	21499	25922	33882	21602	18544	19271	26277	34110	10921	18584	22067	22978	32034	22783
MSTRG.21321	LOC103310328	#N/A	22228	28112	11294	11374	11109	19486	15650	12799	9475	7175	20494	12743	9840	10053	11586
MSTRG.21598	LOC100162182	serine-arginine protein 55-like	22182	29117	29754	27550	31700	16435	28993	29682	29208	21162	18164	20925	33517	23623	22354
MSTRG.7872	LOC100159277	delta-1-pyrroline-5-carboxylate synthase-like	22174	24584	7121	4506	5166	18513	16754	10708	3602	9804	19088	14531	8508	3647	6750
MSTRG.5594	LOC100160640	coiled-coil-helix-coiled-coil-helix domain containing 2-like	22063	24678	15953	12849	17961	20371	19746	15769	12927	15647	24878	21486	17342	11582	13719
MSTRG.18171	LOC100169103	uncharacterized LOC100169103	22048	23800	19774	15222	24712	25831	18166	16949	14088	25294	27229	21360	20376	17604	21669
MSTRG.11993	LOC100164756	long-chain-fatty-acid--CoA ligase ACSBG2-like	21971	28403	12870	14195	9859	16404	19018	15421	12553	7845	17298	13140	9873	12643	10346
MSTRG.19037	LOC100169264	#N/A	21898	17645	13389	19213	17693	19706	16452	14138	20610	9405	19924	17051	11625	17958	17889
MSTRG.18198	Rps27a	ribosomal protein S27A	21726	27844	30337	41615	37223	17736	24870	30820	43143	23033	22402	28443	26549	38409	34443
MSTRG.21812	LOC100166931	polyubiquitin-G-like	21498	20541	23056	34491	24936	19074	20783	26327	30601	20056	23364	18895	24287	27072	27119
MSTRG.11937	LOC100163801	60S ribosomal protein L38-like	21476	27153	26095	38946	34817	17727	22914	27906	43028	20566	21452	27174	21988	39328	33182
MSTRG.8325	LOC100165454	putative rRNA methyltransferase 3-like	21236	23577	21336	30564	24115	16814	20917	21783	30640	14008	18203	22947	20799	28210	22106
MSTRG.22057	LOC100169283	endoplasmin-like	21214	23445	23244	38374	32962	18877	22187	24494	37567	14875	20700	18444	19858	29330	33568
MSTRG.20728	LOC100167019	uncharacterized LOC100167019	21117	29061	31268	43714	33745	17495	25072	32489	42716	21483	19945	27311	30360	40570	34470
MSTRG.7319	LOC100162779	adenosylhomocysteinase-like	21024	26884	29500	35018	28685	17238	24843	28516	33047	21685	19807	23504	30736	29471	27020
MSTRG.8124	LOC100160046	B(0,+)-type amino acid transporter 1-like	20991	31628	11940	9371	9363	22726	16306	15680	8783	11081	16276	12914	11316	9720	13283
MSTRG.13047	LOC100166436	60S acidic ribosomal protein P1-like	20972	23916	20895	19901	23962	17754	20055	19712	18399	18192	21247	22048	21129	17359	16823
MSTRG.18979	LOC100169093	aldehyde dehydrogenase, mitochondrial-like	20955	24557	13028	12975	10350	17738	17959	13829	12341	5603	19096	16139	12679	10469	10313
MSTRG.10541	LOC100167401	structural maintenance of chromosomes protein 4-like	20882	30424	36509	63877	39984	18847	27647	40055	64270	23834	21163	31113	29816	59439	40519
MSTRG.2787	LOC100168726	ferritin-like	20854	14003	11940	14142	19462	18446	15524	12478	15257	17737	20642	15612	16401	11395	17256
MSTRG.7624	LOC100159968	uncharacterized LOC100159968	20644	19749	3755	2340	13178	18101	7802	3032	1515	1077	20400	9997	2520	1831	6582
MSTRG.2237	LOC100166016	#N/A	20632	26033	23559	34673	27957	17118	22624	24552	32297	16934	18085	23727	21694	30565	24828
MSTRG.4965	LOC100162692	fatty acid synthase-like	20519	16018	7920	4740	3168	21526	14368	5578	4213	1412	12868	12091	5959	4016	4088
MSTRG.6843	LOC100164266	glycogenin-1-like	20494	23521	6707	3162	4361	18193	12554	7692	2526	6199	19045	10411	4846	2986	5556
MSTRG.20852	LOC100168589	probable methylmalonate-semialdehyde dehydrogenase [acylating], mitochondrial-like	20488	20084	9885	9596	10684	17852	14634	10538	10081	10290	18211	13829	8388	9388	9116
MSTRG.13166	LOC100166788	putative fatty acyl-CoA reductase CG5065-like	20473	18317	6636	5192	941	23210	13594	3740	5525	214	12696	12657	5506	5956	466
MSTRG.13946	LOC100159232	eukaryotic translation initiation factor 4 gamma 3-like	20394	23782	21998	28369	20238	19452	20197	23930	28487	11521	18186	19191	17456	21874	21903
MSTRG.2485	LOC100163263	inosine-5'-monophosphate dehydrogenase-like	20393	21404	15457	17552	17798	17740	16457	15365	16789	16685	18213	16202	14440	15709	15695
MSTRG.8050	Rps25-1	ribosomal protein S25 homolog 1	20373	22026	20369	29002	28276	16521	18556	21330	31371	18953	20281	22046	19008	29084	26350
MSTRG.10902	Tsr	twinstar	20261	25823	22317	18843	23010	18449	21599	23193	15701	17665	23203	22641	25081	13729	21211
MSTRG.6007	LOC100160853	ribonuclease UK114-like	20236	19827	9334	7749	7934	16053	13792	10433	6789	7272	17359	13291	8101	7782	8081
MSTRG.7653	Cp68	cuticular protein 68	20095	18255	2273	1334	3147	19708	7304	3915	745	1628	30279	15224	3309	823	5137
MSTRG.20727	LOC100162920	uncharacterized protein C6orf168-like	20077	33885	47733	70786	54351	18131	34559	49129	67650	32260	20156	30024	46539	57926	54898
MSTRG.2786	LOC100166657	ferritin heavy polypeptide-like 17-like	19974	12873	16659	22395	20941	17352	13634	17493	24528	24382	27760	22935	21436	19990	24377
MSTRG.21985	Phb	prohibitin	19948	19646	18079	23796	20604	16874	18147	18629	24660	10317	18297	18446	16303	21148	20525
MSTRG.16323	LOC100164013	Glycine dehydrogenase	19924	17237	9400	7781	6693	16726	15387	10081	7702	4510	17446	11441	5734	5935	6383
MSTRG.15966	Fib	fibrillarin	19919	27758	19792	21756	14221	13184	28614	20157	20563	8492	15497	21348	26041	18062	14326
MSTRG.17500	LOC100167586	probable pyruvate dehydrogenase E1 component subunit alpha, mitochondrial	19912	19206	12667	15595	11777	16800	15738	12395	15972	6373	18301	13575	10349	12944	12472
MSTRG.12240	LOC100165258	WD repeat domain phosphoinositide-interacting protein 2-like	19895	24311	26718	40856	33881	18252	22277	29057	40916	22009	17961	22017	26383	37051	30946
MSTRG.10586	LOC100165332	ribose-phosphate pyrophosphokinase 1-like	19870	19685	16704	16620	13730	16343	18386	17118	16035	7916	18243	15686	13198	12604	12681
MSTRG.16077	LOC100164159	ribosomal protein S27A-like	19835	25911	24614	30213	26388	17086	21947	25567	29319	17643	21229	24734	22558	27635	26202
MSTRG.15856	LOC100165888	uncharacterized LOC100165888	19782	22395	24442	42995	37198	22523	20807	28381	43435	25496	19759	20122	20905	39264	34216
MSTRG.18043	Eff	effete	19710	22482	18766	14560	16178	16642	19467	18373	13032	14313	19050	18946	20251	11386	15443
MSTRG.10323	LOC100163548	putative S-methyl-5'-thioadenosine phosphorylase-like	19657	22521	10564	11610	8507	16707	14881	12491	11148	6377	16968	15171	8016	12016	9448
MSTRG.12960	LOC100163394	eukaryotic translation initiation factor 3 subunit B-like	19649	23422	26180	36044	24970	17431	23133	28247	33568	12520	18023	20152	25088	27083	26358
MSTRG.25	CYTB	cytochrome b	19647	27681	14782	38813	24034	20257	20241	18967	43507	22760	15507	21535	10673	37674	27129
MSTRG.16676	LOC100167084	lipid storage droplets surface-binding protein 1-like	19636	17953	6263	4486	6904	16685	10218	6707	3908	17643	17127	7626	6947	4795	4903
MSTRG.2373	LOC100163830	1,4-alpha-glucan-branching enzyme-like	19502	25056	9037	7732	6610	14989	16155	11387	8362	6010	16993	14486	5507	9483	7287
MSTRG.4579	LOC100160153	glycerol-3-phosphate dehydrogenase, mitochondrial-like	19480	12402	5435	6400	7852	17049	9588	6223	6926	12375	17960	10071	6061	5519	6954
MSTRG.10315	LOC100168217	uncharacterized protein LOC100168217	19410	29602	32536	37578	29610	16605	28201	34311	34276	17876	18313	23796	32318	31089	29534
MSTRG.5238	LOC100159953	uncharacterized LOC100159953	19393	10165	4209	7355	34782	16081	8229	7255	5042	50308	17841	9629	4647	8891	31312
MSTRG.5748	LOC100145826	phosphoglycerate mutase	19300	24581	14619	19716	16695	21929	19008	12757	21537	11064	21973	19393	10611	17892	17436
MSTRG.23194	ACYPI38370	#N/A	19244	16648	2505	1668	1766	16074	6418	2346	872	344	17903	8973	1618	1448	2071
MSTRG.18075	LOC100165781	heterogeneous nuclear ribonucleoprotein-like	19239	30690	36150	39677	37130	17853	28831	36773	34790	17032	20299	25875	36796	28628	36562
MSTRG.2105	LOC100167570	ATP-binding cassette sub-family F member 1-like	19224	24257	16547	11105	12832	17429	20742	17099	10941	11260	18136	23155	20356	9889	12906
MSTRG.13858	LOC100162437	eukaryotic translation initiation factor 2 subunit 3-like	19019	23170	24120	25857	22682	15652	22255	23701	24453	13044	18366	20344	24160	20009	19518
MSTRG.19972	LOC100569852	esterase E4	18900	17905	6557	5160	2911	14528	14075	9595	5834	1828	19963	14426	8682	4696	3922
MSTRG.21608	LOC100164251	pyruvate dehydrogenase E1 component subunit beta, mitochondrial	18837	17888	11118	13633	11147	15209	14078	11230	15182	6373	16241	12695	8837	12199	11224
MSTRG.2234	LOC100167598	cytochrome c1-like	18811	16472	8990	7654	8771	16341	12715	9867	7536	11292	17572	13040	9534	6753	9182
MSTRG.16811	LOC100145829	ribosomal protein S15-like	18798	24832	26881	32855	35491	16141	20999	26037	33728	22952	20211	25076	25600	29942	29150
MSTRG.17810	LOC100160238	uncharacterized LOC100160238	18744	22218	19159	20886	16983	17454	18682	20635	19614	13381	12529	17167	16692	16078	18360
MSTRG.19110	ACYPI23643	#N/A	18612	17262	13108	15106	17014	16617	13936	12997	15637	14017	17601	16270	12448	13860	13885
MSTRG.20243	LOC100569599	cytochrome c oxidase subunit 6B2-like	18603	17827	13713	19388	18767	15906	15043	15380	21959	14854	17676	17058	12043	19484	17771
MSTRG.17131	LOC100168394	uncharacterized LOC100168394	18557	27756	27263	28041	25637	16706	20889	28179	26085	20516	15504	24903	29444	25003	26590
MSTRG.12355	LOC100166122	ATP synthase subunit delta, mitochondrial-like	18552	18642	13456	14291	14990	16377	14893	13812	14287	11994	17879	15583	11825	12767	14155
MSTRG.20774	LOC100163460	eukaryotic translation initiation factor 2 subunit 2-like	18542	21799	20519	30687	24861	15743	18541	21189	32257	13894	19115	22133	18156	30572	25788
MSTRG.7924	LOC100166301	NADH dehydrogenase [ubiquinone] 1 alpha subcomplex subunit 9, mitochondrial-like	18535	18315	9562	7338	9122	16061	14210	10538	7045	11623	17778	13852	10774	6247	9326
MSTRG.5503	LOC100166867	t-complex protein 1 subunit gamma-like	18482	22068	25906	35506	27499	16127	22368	28150	34443	13308	16563	19664	27647	28233	25728
MSTRG.19887	LOC100166540	succinate dehydrogenase [ubiquinone] flavoprotein subunit, mitochondrial-like	18471	18568	12068	15329	13712	15814	15176	12485	15932	14696	16547	12957	11189	13258	13875
MSTRG.15883	Atp5j	ATP synthase-coupling factor 6, mitochondrial (EC:3.6.1.14)	18416	17161	12264	15063	15742	15188	13985	12643	17000	14004	17359	15301	11293	14943	14178
MSTRG.8232	LOC100169384	moesin/ezrin/radixin homolog 1-like	18412	21387	23536	30188	22351	17514	20947	24567	29703	14233	17152	15836	23349	23639	24524
MSTRG.6185	LOC100159400	uncharacterized LOC100159400	18383	16593	12687	17106	17975	16673	14637	14347	20206	12476	18046	15655	11256	18301	15765
MSTRG.11200	Smt3	ubiquitin-like protein SMT3	18338	26611	27130	34108	31464	15633	22310	27978	31818	23305	17956	23550	28722	28067	28507
MSTRG.13074	LOC100167414	cytoplasmic aconitate hydratase-like	18300	22172	12590	10851	8574	15634	16428	14259	9979	6108	14978	13480	10640	9230	9544
MSTRG.9088	LOC100165363	acyl-CoA synthetase family member 2, mitochondrial-like	18207	11675	5285	3653	5836	19031	10296	4571	3414	1804	11884	9235	4094	3258	6751
MSTRG.21491	LOC100162102	t-complex protein 1 subunit delta-like	18197	20498	27060	39082	28351	15347	21379	28265	39283	11253	15823	19134	23531	31271	28990
MSTRG.6749	LOC100160310	titin-like	18177	12423	5624	7154	18070	18083	9034	6040	9197	13978	18865	10863	4524	7742	15233
MSTRG.6050	LOC100144903	ribosomal protein S28e-like	18044	21473	20839	31091	30917	14692	18593	21863	33681	19507	18861	21342	18843	30526	25996
MSTRG.19843	LOC100166650	troponin C-like	18041	9364	2216	1127	9138	14101	5721	2113	968	1295	21166	7198	1046	850	7369
MSTRG.12438	LOC100159387	probable cytochrome P450 6a14-like	17831	4022	5432	3710	2724	35720	4073	3637	6747	6576	19756	9570	7655	4469	3713
MSTRG.8136	Mf	myofilin	17818	10202	2095	683	4505	17393	5204	1803	1356	6633	31211	8569	1541	600	2771
MSTRG.11494	LOC100162995	bleomycin hydrolase-like	17805	25947	21076	23410	18863	16047	23358	21709	23075	18236	17996	20544	21838	20933	18195
MSTRG.18477	LOC100167359	gelsolin-like	17805	24760	8071	6499	11606	17618	15196	9938	5733	22116	18621	11809	7671	7092	9932
MSTRG.13352	LOC100163001	thioredoxin reductase 1, mitochondrial-like	17696	18170	16013	22630	18305	15900	15477	16338	21994	10392	15711	14527	15745	18170	17401
MSTRG.5227	ACYPI38370	#N/A	17625	15284	2416	1342	1100	14819	5391	2369	734	280	16461	8909	1728	1173	1426
MSTRG.21584	LOC100166901	uncharacterized LOC100166901	17596	24086	30502	48681	44924	14080	24206	31416	50108	36358	20145	26904	36045	41583	35397
MSTRG.11906	LOC100166678	uncharacterized LOC100166678	17585	13623	3594	701	3671	18616	10084	6316	509	3003	31365	9662	3899	414	4116
MSTRG.7850	LOC100161123	short/branched chain specific acyl-CoA dehydrogenase, mitochondrial-like	17576	19398	8811	14347	12281	14732	12675	10837	13642	7392	16699	11043	6704	12983	12793
MSTRG.22050	LOC100162429	Dihydrolipoyl dehydrogenase	17568	17338	12502	16448	11997	14640	14397	13157	17764	7760	16092	12565	10651	13956	12606
MSTRG.8703	LOC100159954	probable enoyl-CoA hydratase, mitochondrial-like	17557	16444	9264	11494	11238	14565	12733	9723	11166	6843	15710	12501	7943	10192	9154
MSTRG.11871	LOC100161433	dnaJ homolog subfamily C member 2-like	17547	20364	18770	27806	20853	15484	17858	20243	28717	12199	16426	20083	16564	24357	22406
MSTRG.8052	LOC100163154	fatty acid synthase-like	17452	24545	10470	6059	4614	14156	17492	14378	5125	6989	15456	12700	11650	6308	5783
MSTRG.10059	LOC100161513	cyclic AMP-dependent transcription factor ATF-4-like	17418	20391	16389	16512	17497	15854	19298	17082	16713	14847	16350	15619	14951	14480	17158
MSTRG.17830	LOC100163690	ribosomal protein L11-like	17317	19969	20792	26867	29487	14420	18004	21906	27131	23659	17963	19463	22268	26794	26254
MSTRG.8957	LOC100168767	innexin inx2-like	17310	24731	24679	32306	24877	15279	19699	25584	29224	17202	15212	16109	19857	25361	28822
MSTRG.8578	#N/A	#N/A	17250	6440	778	452	2331	16201	3187	969	231	315	24861	7541	1022	371	1592
MSTRG.19536	LOC100169499	26S proteasome non-ATPase regulatory subunit 2-like	17238	21030	25075	32783	25356	15360	20035	24516	31206	15111	15935	19042	24458	27955	24287
MSTRG.23187	LOC100159560	Cystathionase-like	17226	17445	6342	3062	3321	12726	11965	6733	2594	1373	15383	9615	4800	2361	4187
MSTRG.2084	LOC100164179	Asparaginase	17192	17693	10692	5378	6250	14933	16364	10727	4439	2756	17977	14841	9380	4135	8972
MSTRG.16366	LOC100164125	PERQ amino acid-rich with GYF domain-containing protein 2-like	17056	16958	18863	27939	21448	15096	16278	20234	24213	14277	14174	15867	17946	22821	20407
MSTRG.3441	LOC100163667	piwi-like protein 1-like	16992	12871	9312	7791	7431	14501	11356	8576	6812	4729	12514	10257	11289	6402	7854
MSTRG.22107	LOC100168603	RNA-binding protein cabeza	16970	23557	26107	17032	20373	14072	24682	27108	14240	11123	16841	21276	31926	10929	18126
MSTRG.20694	Lwr	lesswright	16908	27021	27845	27176	29658	15648	22465	25815	24536	20217	18628	22560	29383	22817	25275
MSTRG.16	ATP6	ATP synthase F0 subunit 6	16881	15783	10356	15568	15711	16381	13064	9711	18658	11839	15490	15186	14438	13807	12492
MSTRG.22113	LOC100159728	facilitated trehalose transporter Tret1-like	16838	14825	10350	7197	6015	11166	14302	11056	7553	5009	14509	10012	9033	5661	7386
MSTRG.15630	LOC100161161	glucose-6-phosphate isomerase-like	16798	11871	8138	5921	8857	13140	9033	7680	5739	7046	12894	10832	7596	5339	6276
MSTRG.20404	LOC100165802	prohibitin-like	16651	18631	15605	15704	16254	14281	14208	14480	14960	11200	13820	15292	13619	14928	13142
MSTRG.6989	LOC100160380	UDP-glucuronosyltransferase 2B10-like	16636	17932	5566	4317	5847	14219	10720	6870	3930	4840	15251	9299	4136	4081	6224
MSTRG.13545	LOC100167461	vigilin-like	16501	19313	17745	21097	16188	14492	17098	18696	20078	8115	13661	13338	14828	16317	17733
MSTRG.10528	Atp5l	ATP synthase, H+ transporting, mitochondrial F0 complex, subunit G (EC:3.6.1.14)	16487	15609	11546	15507	15327	13412	13582	12291	17844	11657	16126	14415	10061	15394	14307
MSTRG.19847	LOC100168717	eukaryotic translation initiation factor 2 subunit 1-like	16480	19670	20417	23939	22615	14310	17842	20977	22711	14829	16118	17986	20636	21582	20437
MSTRG.20224	LOC100165225	pescadillo homolog	16374	17737	17754	24235	18501	13591	17501	19928	23349	10248	14525	15541	17680	21007	18681
MSTRG.16402	LOC103310324	#N/A	16340	14008	11004	9750	9558	12718	13820	8916	10042	8697	15703	14338	7345	9426	7386
MSTRG.16293	LOC100161135	protein SDA1 homolog	16272	18994	18154	28691	23007	13838	16403	19525	29772	17387	16198	19483	16562	28005	23829
MSTRG.414	LOC100144776	#N/A	16262	10242	6699	6126	5955	12372	8638	6448	5907	4295	10199	8375	6868	5395	5287
MSTRG.18438	LOC100165901	uncharacterized LOC100165901	16247	22567	24608	25119	21178	14416	18560	23325	24194	18364	17261	23576	27896	23340	24238
MSTRG.16874	LOC100162444	eukaryotic translation initiation factor 4 gamma 2-like	16239	21748	23053	29896	22673	14837	20337	24760	28001	14580	14934	16914	22429	23059	25992
MSTRG.18118	LOC100169068	uncharacterized LOC100169068	16225	16611	15263	22423	22391	15081	15857	16940	23640	20505	15812	13011	15208	19733	19655
MSTRG.10219	LOC100162520	puromycin-sensitive aminopeptidase-like	16224	18149	15438	21529	16715	14201	15227	16837	21801	11397	14041	13206	14133	17476	17164
MSTRG.10911	LOC100162189	acyl-CoA-binding protein-like	16221	16145	10551	14964	13123	12871	12435	11803	15877	12236	13672	12156	9061	16155	12974
MSTRG.9959	Catb-348	cathepsin B-348	16213	22697	15621	19044	17291	13096	14212	17198	17488	17572	14986	11761	15956	17989	14793
MSTRG.13279	LOC100161608	uncharacterized LOC100161608	16181	24359	23621	27416	24404	16581	21868	25655	24995	16067	16196	17545	22819	22048	25233
MSTRG.9986	Awd1	abnormal wing discs 1	16159	13446	5770	5819	6903	12505	9842	6077	6738	6704	16319	10146	4910	6010	5795
MSTRG.6706	LOC100162276	adenine phosphoribosyltransferase-like	16154	14325	12129	13538	8956	13600	13751	11255	14879	6977	14362	14815	9408	11932	8838
MSTRG.21730	LOC100168040	clathrin heavy chain-like	16133	16971	14927	22783	18905	15270	14331	16768	20397	10455	13955	11843	14700	15989	19175
MSTRG.18135	LOC100163141	importin subunit alpha-7-like	16070	18485	18633	24129	17990	14390	17148	20550	23682	11496	14623	14738	17699	19251	18471
MSTRG.12746	LOC100159107	translocation protein SEC63 homolog	16028	16850	14621	26047	23629	14966	14501	15743	26092	14619	14767	16351	13414	23759	20519
MSTRG.21503	LOC103308991	#N/A	15939	15863	8079	4925	7744	13368	12359	8509	4780	9792	15623	11566	7877	4595	7022
MSTRG.19185	LOC100169432	uncharacterized LOC100169432	15937	9339	2680	2038	2213	12052	5935	2258	1722	1290	9496	5639	1830	1691	1965
MSTRG.10595	LOC100169395	laminin subunit alpha-like	15926	23207	17204	20183	13196	15655	17986	19835	14306	4478	14392	9986	10969	14235	16815
MSTRG.21642	LOC100161329	monocarboxylate transporter 14-like	15896	12642	9919	6101	4602	15845	15536	9072	5722	7512	14169	15068	10102	6272	6216
MSTRG.3032	LOC100168862	integral membrane protein 2B-like	15850	13830	8095	10129	12190	14753	10565	8956	10171	13842	16313	12026	8352	8939	10154
MSTRG.9884	LOC100167947	stress-induced-phosphoprotein 1-like	15771	21128	21332	25948	20084	12944	20340	22819	24645	12531	15934	19136	19502	20637	18842
MSTRG.8357	LOC100166459	tubulin beta-4 chain-like	15769	18105	12356	8486	14332	14372	16656	12824	7398	5662	17541	17022	14951	6260	10329
MSTRG.20522	LOC100144917	protein phosphatase 2 catalytic subunit alpha isoform	15766	17947	19335	24983	19450	13662	16308	20508	23487	12142	15353	13785	18041	18454	19974
MSTRG.7148	LOC100160732	casein kinase II subunit alpha-like	15742	18097	15541	17610	16250	13831	15508	16004	16199	11801	15018	16090	15682	15111	15891
MSTRG.20011	LOC100163017	possible pseudogene or miscRNA, No KEGG entry	15722	15036	16751	27779	26601	14523	14295	18041	25730	16607	14463	9900	17603	22788	27658
MSTRG.9440	LOC100159179	t-complex protein 1 subunit zeta-like	15666	18880	24318	33131	24473	13545	19843	25578	33024	10899	14143	17606	23674	28035	25264
MSTRG.18259	LOC100169201	probable hydroxyacid-oxoacid transhydrogenase, mitochondrial-like	15656	18617	6586	4865	5136	13778	11864	7850	3915	6530	14652	10914	3750	5557	4212
MSTRG.11334	LOC100158833	t-complex protein 1 subunit alpha-like	15580	18401	23234	26409	21172	13461	19673	23647	25502	9126	14468	17377	22260	20831	19430
MSTRG.21551	LOC100165491	uncharacterized LOC100165491	15527	16489	12554	18746	16851	14198	14358	13765	18039	12560	13094	15302	12652	16889	15409
MSTRG.15814	LOC100159664	mitochondrial 2-oxoglutarate/malate carrier protein-like, active transporters; similar to 2-oxoglutarate carrier protein	15521	11894	5330	3992	3892	14536	9711	5553	3983	2659	13477	12191	5396	3728	4899
MSTRG.19319	LOC100160041	dihydrolipoyllysine-residue acetyltransferase component of pyruvate dehydrogenase complex, mitochondrial	15519	14381	8831	8349	6855	13883	11621	8532	8155	6324	14636	10666	7602	7109	7014
MSTRG.19674	ACYPI39568	#N/A	15517	6665	938	636	2190	14775	2868	1040	245	249	21926	6990	1073	389	921
MSTRG.14088	LOC100167123	renin receptor-like	15495	11901	8629	10725	9878	13362	11280	8979	11287	5210	13918	11436	7798	9122	9186
MSTRG.22026	Ctsl	cathepsin L (EC:3.4.22.15)	15495	16200	13769	20489	21719	15397	12986	14847	19827	24424	14555	10969	14169	17127	19858
MSTRG.21627	LOC100162655	beta-1,4-mannosyltransferase egh-like	15494	15318	10818	11807	7884	13658	13214	10571	10942	3947	12971	11545	8426	8657	8656
MSTRG.17040	LOC100144904	stunted-like, active transporters; stunted-like isoform B	15452	13446	11505	14113	16322	13412	12090	11327	15048	11984	16014	13817	10982	13419	13182
MSTRG.17314	LOC100169462	v-type proton ATPase subunit B-like	15440	12393	8310	11559	10107	13754	10789	8736	12685	5302	15159	11798	7992	10397	9873
MSTRG.18098	LOC100166408	NADH dehydrogenase [ubiquinone] 1 alpha subcomplex subunit 10, mitochondrial-like	15390	14020	8665	9702	9448	13336	12032	8876	9857	9145	13783	11104	8662	8331	9335
MSTRG.19860	LOC100160939	cytochrome c oxidase subunit 6C-like	15377	14325	10713	13521	13381	12119	12369	11178	14935	10445	13395	12707	9019	13715	13285
MSTRG.17318	LOC100165369	la protein homolog	15322	19009	20311	25383	21156	12300	18655	19531	24951	10075	13798	18051	18554	21913	18412
MSTRG.19564	LOC100159359	pre-mRNA-processing-splicing factor 8-like	15298	20483	27214	35551	25987	14039	20330	29122	33426	13320	12743	16273	24389	27322	25819
MSTRG.19917	LOC100160737	cuticle protein-like	15269	11037	954	280	2341	16730	3743	825	426	1669	20538	7780	1076	221	996
MSTRG.2908	LOC100163550	zinc finger protein on ecdysone puffs	15243	23669	30083	32052	30795	13249	23057	29654	27762	21072	15573	20358	31437	25162	24297
MSTRG.9727	LOC100571587	v-type proton ATPase subunit G-like	15221	13428	8296	11223	10590	12730	11590	8695	11282	6338	15250	12327	7926	9777	9728
MSTRG.15714	LOC100163545	transcription elongation factor SPT6-like	15218	17591	17865	20736	17156	13779	16817	19027	18090	13039	14158	16512	19133	17307	17492
MSTRG.10964	LOC100165411	putative ATP-dependent RNA helicase Pl10-like	15186	17518	18722	20991	17241	14158	17096	20281	20051	10612	13591	13787	18918	15635	16102
MSTRG.8835	LOC100162093	mitochondrial import receptor subunit TOM70-like	15170	14315	12960	14170	12337	12231	11713	11473	15377	6798	13218	12758	10047	13365	13144
MSTRG.10415	LOC100166617	gamma-glutamyltranspeptidase 1-like	15152	17008	8360	4070	2762	11944	14907	9964	3671	516	14221	10714	4316	3898	4057
MSTRG.15417	LOC100168384	peroxiredoxin-5, mitochondrial-like	15118	18231	16398	23450	20005	13244	14502	17311	23840	13311	15458	15011	15512	21069	20432
MSTRG.19340	LOC100160486	facilitated trehalose transporter Tret1-like	15039	12543	4746	4960	3657	14177	10484	4994	5993	13757	16982	9534	8755	4002	4987
MSTRG.15267	LOC100159906	putative ribosomal RNA methyltransferase NOP2-like	15032	17798	17447	24559	18586	12882	16233	17904	24103	11325	13045	18614	15510	22382	17916
MSTRG.14294	LOC100162864	putative inorganic phosphate cotransporter-like, Organic acid transporter; sodium-dependent inorganic; similar to AGAP007732-PA	15019	13340	6063	5096	4336	11376	10489	5767	5006	5735	12876	8625	3816	4981	4047
MSTRG.6869	LOC100166800	proliferation-associated protein 2G4-like	15003	18583	20023	25121	19118	12482	18087	20472	25233	9196	14061	16911	17465	20734	19714
MSTRG.17707	LOC100168452	t-complex protein 1 subunit eta-like	14990	20010	24408	31383	23108	13075	21289	24853	29885	10789	13574	18352	25843	24487	20988
MSTRG.21649	Vha36	active transporters; vacuolar ATPase subunit D	14989	13571	9203	14705	12044	13357	11876	9899	15794	6767	14659	12449	7500	13048	12534
MSTRG.6329	LOC100144902	ribosomal protein S28e-like	14984	16312	13010	9711	12389	11629	13420	12215	9721	10206	17488	16017	12048	9283	9822
MSTRG.11517	LOC100167132	uncharacterized LOC100167132	14980	21359	30441	30693	27306	15503	22546	31536	31552	16809	12953	16900	28532	26953	27554
MSTRG.17843	LOC100162883	uncharacterized LOC100162883	14893	15762	16380	26593	22092	13210	13691	18597	26946	20417	12678	14917	14433	24994	21575
MSTRG.12634	LOC100167199	uncharacterized LOC100167199	14825	11478	5211	4960	5558	13851	9629	4781	5437	7779	12094	7975	4479	5088	5576
MSTRG.8296	LOC100164587	4-aminobutyrate aminotransferase, mitochondrial-like	14818	12864	6338	4056	4039	18399	12341	7845	3676	2848	14662	10627	8632	3265	3233
MSTRG.11105	LOC100165066	actin-87E-like	14791	13366	2668	496	1917	13026	7173	2900	307	466	20773	8518	1557	411	1531
MSTRG.7940	LOC100161675	phosphatidylethanolamine-binding protein-like	14785	15094	11489	12389	11685	12972	13127	12212	12322	7548	13756	12853	11402	10906	9815
MSTRG.12964	LOC100163715	uncharacterized LOC100163715	14718	9788	1274	455	3051	14939	3214	1039	240	3293	18341	6065	1031	385	2729
MSTRG.22085	LOC100163094	facilitated trehalose transporter Tret1-like	14705	16037	9605	10423	13168	12693	11446	10976	10099	9655	14539	10510	10151	8319	13473
MSTRG.19611	LOC100165921	uncharacterized LOC100165921	14696	14823	2975	1286	4477	12885	7268	3224	714	315	15807	7339	2442	1072	1748
MSTRG.10486	LOC100159700	uncharacterized LOC100159700	14679	11907	3777	5863	9657	17039	6938	4375	5917	6033	11174	7415	4418	3791	9143
MSTRG.10891	LOC100168223	uncharacterized LOC100168223	14671	5476	516	332	519	13182	3796	944	320	292	13272	4356	1076	329	107
MSTRG.14032	LOC100166124	uncharacterized LOC100166124	14641	20221	15839	21938	13837	12131	15899	17264	19848	9771	12314	11491	14366	16380	17689
MSTRG.8522	LOC100570317	cytochrome b-c1 complex subunit Rieske, mitochondrial-like	14624	12053	5653	10494	12967	15668	7050	7696	10952	9304	9513	6091	10338	9786	7492
MSTRG.18086	LOC100167805	RNA-binding protein squid-like	14608	22116	24500	26337	21553	12852	20535	25037	24903	11777	14682	19075	24271	20987	22280
MSTRG.9754	LOC100163589	Phosphoserine transaminase	14607	12198	8101	6123	5609	12044	11616	7955	5170	6211	12451	12456	8587	5125	5512
MSTRG.7889	LOC100164695	aldo-keto reductase-like	14605	15733	12878	17889	13191	12424	13482	13095	19363	6954	12745	13449	10331	16031	14318
MSTRG.15834	LOC100165203	alpha,alpha-trehalose-phosphate synthase [UDP-forming] A-like	14555	18481	7010	4183	8665	13115	13001	9109	3216	27577	16602	10207	7937	3852	8358
MSTRG.17515	Cprr1-7	RR1 cuticle protein 7	14505	14476	5734	1352	2783	15879	13164	9600	905	3439	33116	9667	5503	970	3647
MSTRG.10122	LOC100163867	uncharacterized LOC100163867	14497	17337	5089	917	2533	11844	8681	5345	1208	2197	10166	8390	5208	1116	2817
MSTRG.12920	Ppib	peptidylprolyl isomerase B (cyclophilin B) (EC:5.2.1.8)	14482	15147	12222	18583	20547	12618	12859	12203	18155	9733	13461	11972	11671	15317	16455
MSTRG.12615	LOC100160481	laminin subunit gamma-1-like	14424	23348	15832	13034	11354	13587	16403	17210	11928	6139	13777	12110	14114	10292	12489
MSTRG.17637	LOC100164191	electron transfer flavoprotein subunit alpha, mitochondrial-like	14372	15108	8332	7469	9574	11558	11165	8324	7779	10559	13875	10034	7407	7024	7841
MSTRG.18117	LOC100164311	Histone H2AV (H2A.F/Z)-like	14317	23250	28684	26580	23709	13027	21750	28482	25033	15139	14997	21628	30499	22641	24761
MSTRG.11881	LOC100166845	uncharacterized LOC100166845	14280	7797	4687	7099	6517	12319	7007	5378	8371	8667	13142	9486	4919	7013	5832
MSTRG.5402	LOC100169345	peroxiredoxin-6-like	14268	15229	9958	10925	11772	13794	11077	10828	11002	12923	15529	10532	9681	11986	10267
MSTRG.21048	Slc16a10	MCT-Organic acid transporters;monocarboxylic acid transporters;LOC100161392	14230	11803	7840	11732	8461	13716	11477	8647	12858	4391	12520	9725	8487	10013	10470
MSTRG.2482	LOC100165336	uncharacterized LOC100165336	14226	12260	8591	11212	11967	9300	10639	8876	14124	10210	12654	10533	8215	12362	12090
MSTRG.21949	VhaAC39	vacuolar H[+]-ATPase C39 subunit, active transporters; similar to vacuolar ATP synthase	14214	11193	6570	5709	6461	12288	9990	6968	5474	4840	13353	9562	7468	4822	6291
MSTRG.5502	LOC100161752	26S proteasome non-ATPase regulatory subunit 1-like	14170	16071	16372	21352	16260	13824	16188	17369	20448	10677	12444	13048	18254	16812	16376
MSTRG.19534	LOC100166954	n-acetyl-D-glucosamine kinase-like	14155	11320	4984	4041	4979	12025	9699	7118	3887	6577	8083	8212	3202	3936	6164
MSTRG.18236	LOC100573753	up-regulated during skeletal muscle growth protein 5-like	14139	13805	10122	12024	13115	11956	11125	10461	12903	10813	13491	11501	8985	11318	10682
MSTRG.15491	LOC100144886	cytochrome B5-like protein	14129	12313	9199	10307	10520	14802	10367	9234	10382	6731	13523	11460	8860	8853	9563
MSTRG.22016	LOC100162815	acetyl-CoA acetyltransferase, cytosolic-like	14104	11701	7084	10651	11058	11807	9614	7873	10229	6708	12287	8210	6848	8845	9390
MSTRG.11587	Uqcrb	ubiquinol-cytochrome c reductase binding protein (EC:1.10.2.2)	14083	12769	9236	14216	13234	11388	10690	9588	16657	10978	12932	10872	7528	13732	12627
MSTRG.8226	LOC100167278	dihydrolipoyllysine-residue acetyltransferase component 1 of pyruvate dehydrogenase complex, mitochondrial-like	14078	13058	7661	8842	8069	12057	10056	7746	8948	6623	12170	9483	6619	7643	7721
MSTRG.3025	LOC100167567	H/ACA ribonucleoprotein complex subunit 4-like	14058	17710	18230	23412	18662	11834	17155	18596	23358	10889	13238	16263	18506	20885	17946
MSTRG.20494	LOC100161360	putative ATP-dependent RNA helicase me31b-like	14035	14661	13239	20263	13715	11835	11596	14404	19460	6178	9816	8524	11010	14246	14538
MSTRG.21109	Cam	calmodulin (EC:2.7.11.19)	14017	21313	18263	13346	19608	12765	12358	15826	15394	8035	20334	11730	12651	10250	12813
MSTRG.19207	LOC100159939	uncharacterized LOC100159939	13985	7194	685	146	10024	20968	3372	604	112	6851	26124	6988	793	82	3061
MSTRG.21233	LOC100162319	hemocytin-like	13960	12405	6611	3825	4089	16960	9907	6768	4379	5582	9859	9769	5973	3201	5122
MSTRG.15125	LOC100160026	Sparc-like	13936	15312	7650	11146	11431	13086	11682	10880	11219	10694	12495	10869	6055	12017	12720
MSTRG.5094	LOC100166832	eukaryotic peptide chain release factor GTP-binding subunit ERF3A-like	13882	15975	14625	17753	14981	12362	14285	14869	18784	7759	13181	13709	12960	15148	14639
MSTRG.2241	LOC100159769	possible pseudogene or miscRNA, No KEGG entry	13881	19535	15430	17570	14528	13794	15305	16755	16320	8660	12702	11806	12453	14186	16132
MSTRG.17889	Sdhb	succinate dehydrogenase B	13857	12001	8412	10935	10998	12408	10538	8510	12286	9515	13819	10775	8301	9728	11006
MSTRG.21404	LOC100165351	uncharacterized LOC100165351	13851	11112	6888	8639	18281	16146	11068	8025	9846	9760	15790	11142	4400	7158	13373
MSTRG.11609	Elovl6	ELOVL family member 6, elongation of long chain fatty acids	13838	13518	9216	6412	9339	13287	11753	9535	6094	12954	15536	10702	9994	5217	7913
MSTRG.6324	LOC100160435	eukaryotic translation initiation factor 3, subunit M-like	13831	15797	16946	19377	16074	11734	15637	16592	19450	9320	13735	14221	15304	16230	15206
MSTRG.11075	LOC100160260	membrane-bound alkaline phosphatase-like	13831	5699	2775	2383	1752	8899	5749	2764	3009	873	11552	6896	4245	1932	2103
MSTRG.10562	LOC100167498	protein argonaute-2-like	13801	18192	21229	32910	26811	13717	16182	22645	32073	18650	13272	12654	21120	26361	28062
MSTRG.19056	LOC100159884	probable methylthioribulose-1-phosphate dehydratase-like	13769	15710	11588	13282	10063	10652	12622	12323	12814	7231	12028	11596	11079	11491	9567
MSTRG.8707	LOC100167427	uncharacterized LOC100167427	13674	4418	615	489	1955	13035	2498	878	424	268	18822	5996	1053	362	1261
MSTRG.5229	LOC100160110	uncharacterized LOC100160110	13636	3922	1364	1075	3084	8991	2887	1807	1112	1348	10656	4027	1461	1321	6834
MSTRG.128	Eif1	eukaryotic translation initiation factor 1	13570	16505	19366	19074	22777	12164	14855	18286	18011	18720	14833	16405	22112	16477	17921
MSTRG.9048	LOC100575991	uncharacterized LOC100575991	13569	16780	15644	17305	22666	14041	13813	16975	16851	22833	14421	14521	16134	16891	20873
MSTRG.17597	LOC100168379	collagen alpha-2(IV) chain-like	13542	13257	1381	651	5987	12178	5286	2449	230	3360	19684	5894	1244	298	5299
MSTRG.4918	LOC100164249	importin-4-like	13485	15593	14790	17674	12935	11316	14065	15127	17003	8158	11238	11803	11478	13340	14298
MSTRG.7451	LOC100159192	t-complex protein 1 subunit beta-like	13430	17577	19624	25246	21207	11479	17411	19130	24096	9771	12274	15429	19033	20608	20084
MSTRG.9633	LOC100163098	ATP-dependent helicase brm	13343	18310	20670	33065	27277	12424	17254	22840	32812	21633	13310	15672	19139	29988	27041
MSTRG.16924	LOC100165681	elongation factor Tu, mitochondrial-like	13339	13683	10114	12069	10078	11050	12050	10592	11506	6714	11779	11522	10149	9542	10309
MSTRG.4034	LOC100163340	elongation factor 1-alpha-like	13316	15629	10210	4084	5995	11530	12670	10620	3419	6935	11831	9307	13142	3503	6698
MSTRG.1069	LOC100160667	uncharacterized LOC100160667	13284	23488	14126	3861	4204	15628	28278	20788	2344	9048	46183	17120	12802	2747	4785
MSTRG.21572	14-3-3epsilon	14-3-3 protein epsilon	13268	24255	22511	29682	27382	13496	19447	23333	28015	14698	15084	17151	24500	20190	27490
MSTRG.18470	LOC100168636	basement membrane-specific heparan sulfate proteoglycan core protein-like	13254	13754	8090	5354	7153	13971	10643	9736	4199	4603	13368	8915	10037	3400	8959
MSTRG.7247	LOC100158883	glutamate synthase [NADPH], GltS; GOGAT	13236	13709	7910	7315	4372	10996	10738	8092	7014	2765	10330	6241	6225	5325	5350
MSTRG.12946	LOC100159205	NADH-cytochrome b5 reductase-like (EC:1.6.2.2)	13236	11817	10463	15251	13613	11445	10232	10753	16352	8105	12275	10907	8633	14171	13458
MSTRG.17876	LOC100165913	far upstream element-binding protein 1-like	13235	17176	19753	16584	15111	11850	17757	20426	14880	7768	12081	13727	20823	12003	15451
MSTRG.20965	LOC100159933	isocitrate dehydrogenase [NADP] cytoplasmic-like	13200	21413	12670	17957	16466	16898	16264	13917	17386	10499	16211	13037	10614	15551	16134
MSTRG.4802	LOC100159520	high mobility group protein A-like	13179	22882	35196	31898	25614	11476	22410	34588	29579	24827	13575	21559	35463	28408	26522
MSTRG.18599	LOC100160406	NADH dehydrogenase [ubiquinone] iron-sulfur protein 2, mitochondrial-like	13105	11220	8360	9349	9248	11007	10459	9368	9541	8192	10853	8810	8365	8123	9431
MSTRG.16189	LOC100164332	LIM domain-containing protein unc-97-like	13063	11669	7746	10925	10160	11222	10635	8933	11232	7564	12246	9676	8367	9822	9549
MSTRG.18681	LOC100169151	uncharacterized LOC100169151	13053	16272	14605	13675	16380	12163	14098	14053	11412	10947	11293	10863	14856	12099	14265
MSTRG.1461	LOC100168999	FAD-dependent oxidoreductase domain-containing protein 1-like	13042	13249	5499	6855	7331	12407	9072	6670	6784	5739	10849	8419	4464	6424	7287
MSTRG.5426	LOC100158672	NADH dehydrogenase [ubiquinone] flavoprotein 1, mitochondrial-like	13001	11275	8247	7571	7364	11079	10062	8380	7964	7708	11546	9234	7926	6399	7003
MSTRG.10478	LOC100169542	serine/threonine-protein kinase PRP4 homolog	12981	14500	16420	26856	22774	11241	13424	16959	26814	17527	11171	13785	15593	24458	18708
MSTRG.19047	LOC100163703	CAD protein-like	12963	11420	9317	8730	7094	10325	9874	9695	7697	4159	11568	6527	9090	6007	6754
MSTRG.6232	LOC100163271	calnexin-like	12900	11800	9755	13794	12800	10876	11025	11393	13688	7109	11362	8602	9803	11751	11839
MSTRG.11581	LOC100160386	eukaryotic translation initiation factor 3 subunit L	12889	14551	16709	22974	15646	11052	14566	19118	22978	7351	11854	12582	14595	17694	17802
MSTRG.20795	LOC100164886	t-complex protein 1 subunit theta-like	12888	15429	15034	12570	11660	10973	14732	15509	11186	8593	11796	13432	16216	10206	13015
MSTRG.9764	LOC100568670	plexin-A3-like	12881	13715	9372	5865	6324	10185	13111	8676	6565	5229	12718	10075	6660	6107	6017
MSTRG.11425	LOC100161204	probable isocitrate dehydrogenase [NAD] subunit alpha, mitochondrial-like	12846	10586	6019	4793	7005	11251	8806	6142	5921	8975	11258	8411	6472	4622	6389
MSTRG.15134	LOC100163547	uncharacterized LOC100163547	12841	22209	28550	50161	31216	12357	19764	33180	51878	16924	14077	21601	21677	45757	35517
MSTRG.5197	LOC100167867	porphobilinogen deaminase-like	12770	10638	6594	8321	9546	11469	8576	6404	8476	8218	11440	8262	6339	7892	8856
MSTRG.13731	LOC100162798	high affinity cationic amino acid transporter 1-like	12752	14942	2636	1221	1966	10639	6820	2917	970	2804	11425	5956	2064	1264	2002
MSTRG.11332	LOC100162912	NADH-ubiquinone oxidoreductase 75 kDa subunit, mitochondrial-like	12737	12313	8865	10009	8721	11151	11034	9652	10736	7235	10610	8455	8213	8048	8856
MSTRG.13756	Cpvl	carboxypeptidase, vitellogenic-like (EC:3.4.16.-)	12702	15608	12063	10357	13691	10487	14272	13849	11915	13764	13693	11982	15286	11047	9237
MSTRG.17007	LOC100165835	stearoyl-coa desaturase-like	12699	9002	5077	4146	4514	12852	8069	3551	4702	3443	8376	8438	4245	4562	3954
MSTRG.17035	LOC100160017	leucine-rich repeat-containing protein 59-like	12697	16222	14877	19656	18179	12159	13872	16402	19625	10562	12991	12556	14381	15923	16627
MSTRG.20290	LOC100163823	methionine aminopeptidase 2-like	12665	16257	16628	21808	16235	11159	15154	17063	21685	7234	12613	16632	15379	19167	15197
MSTRG.11940	Sec61a1	Sec61 alpha 1 subunit	12663	13513	13520	18706	16403	11336	13478	13721	19145	5657	11771	10679	11368	14260	15005
MSTRG.21690	LOC100167587	Branched chain-amino acid transaminase	12632	17184	6881	6640	6921	10807	11707	7595	6292	14094	11739	8122	4816	5927	5181
MSTRG.21220	LOC100159186	transaldolase-like	12595	13333	7310	10223	10471	7432	8475	10619	13975	6883	8613	9660	6224	12394	11483
MSTRG.8230	LOC100161938	ATP-dependent RNA helicase WM6-like	12586	16991	25745	34260	23911	10584	17881	27774	33291	12158	11761	14643	23379	26859	26781
MSTRG.18207	LOC100166614	superoxide dismutase [Cu-Zn]-like	12581	10685	9455	11574	9807	14226	9236	7688	12716	4808	10529	9206	6208	10738	10819
MSTRG.16386	LOC100169485	calsyntenin-1-like	12579	9860	8607	11165	9973	11572	9476	9200	9914	7582	10381	6471	8887	7372	11160
MSTRG.3341	LOC100168188	uncharacterized LOC100168188	12561	9321	2662	1937	4630	14905	5545	3665	4131	969	8968	6279	2288	3041	4955
MSTRG.12565	LOC100168285	26S protease regulatory subunit 4-like	12555	16012	17893	25749	19689	11566	14612	18151	25678	10791	11845	13780	15932	21911	18893
MSTRG.12406	LOC100162061	chromodomain-helicase-DNA-binding protein 1-like	12528	15750	17581	28614	24029	11680	13958	18336	27318	20182	13076	15559	15140	26111	21294
MSTRG.5664	Miple	miple protein	12514	16403	9313	10977	14586	11672	11209	10118	10752	13694	12660	9544	9389	9683	11754
MSTRG.17145	LOC100169636	26S protease regulatory subunit 7-like	12505	16159	18090	27108	20443	11674	15511	19070	26956	10689	12182	14934	18126	22858	19438
MSTRG.16766	LOC100159040	probable rRNA-processing protein EBP2-like	12444	14223	13412	18909	15261	10495	13184	14402	18781	8839	11517	13492	13336	15829	13926
MSTRG.5926	ACYPI38480	#N/A	12434	714	445	159	1002	6309	1579	641	702	1192	10125	4621	1139	458	505
MSTRG.152	LOC100159375	glucose-6-phosphate 1-dehydrogenase	12433	14173	10324	6436	4673	10651	13276	12988	5272	4568	11143	10121	6852	5531	4763
MSTRG.16915	LOC100160121	uncharacterized LOC100160121	12419	5735	1040	410	3940	9775	3468	981	314	594	14108	5261	544	246	2297
MSTRG.21287	LOC100168287	ATP-binding cassette sub-family F member 2-like	12417	13472	16940	22728	16549	10580	13536	18300	23983	7061	11383	13365	15319	18950	18627
MSTRG.11445	LOC100167436	eukaryotic translation initiation factor 4H-like	12414	13488	14090	11483	11636	10394	13995	13652	10884	6149	11765	11845	15002	8190	10366
MSTRG.20111	LOC100165864	eukaryotic translation initiation factor 4E transporter	12295	9762	6858	8652	8312	9938	7338	6475	8042	6019	8462	6760	6446	7204	6562
MSTRG.8361	LOC100167063	apoptosis-inducing factor 3-like	12275	10273	7880	9802	10982	11356	8664	7912	10001	10285	11141	7661	7245	8480	10040
MSTRG.12025	LOC100169118	NADH dehydrogenase [ubiquinone] 1 alpha subcomplex subunit 4-like	12275	12294	8597	12069	11837	10178	9915	9372	13165	10993	11837	10747	7142	12314	11200
MSTRG.21898	LOC100165180	eukaryotic translation initiation factor 5-like	12262	13948	12179	14011	10211	11393	11959	12321	13470	9630	11054	11632	9046	11232	10580
MSTRG.15213	LOC100166380	fumarate hydratase, mitochondrial-like	12254	12882	9544	10393	9815	11344	11815	9295	10914	7350	11839	11244	8811	9054	8960
MSTRG.22860	LOC100568543	cathepsin B-like cysteine proteinase-like	12234	843	1069	286	283	7896	3077	1608	995	26	11668	7845	2852	425	203
MSTRG.8885	LOC100570951	uncharacterized LOC100570951	12208	18801	8971	12968	11559	9733	13111	11483	13033	13079	11759	10493	6662	12845	11294
MSTRG.8743	LOC100167277	uncharacterized LOC100167277	12205	12218	11982	21910	18885	11138	9783	13035	20545	13651	10473	10322	10005	19411	18485
MSTRG.9512	LOC100161504	acyl-protein thioesterase 1,2-like	12192	9942	5079	3704	2848	10271	6922	4976	3171	2876	12784	7028	5494	4374	2361
MSTRG.16845	Got2	glutamate oxaloacetate transaminase 2 (EC:2.6.1.1), Aspartate transaminase; Got2	12166	11523	11288	12844	10340	10105	11162	11024	13738	5458	10802	10787	9985	11282	10431
MSTRG.19551	LOC100575172	10 kDa heat shock protein, mitochondrial-like	12151	13815	14583	21439	15261	8856	12742	15218	23262	7085	11589	14270	12045	18974	16618
MSTRG.14260	LOC100160144	CG1943-like	12114	8685	10363	23433	20145	10083	8215	10604	11922	11251	7142	8255	9547	10678	20246
MSTRG.7435	LOC100167074	DNA topoisomerase 2-like	12092	23865	31894	32181	23325	10318	21799	30719	30762	17255	11803	20290	31153	25667	22904
MSTRG.10378	LOC100165969	importin-5-like	12084	12951	13017	15396	9729	10063	12008	13110	14292	5722	9887	9135	12382	11379	11670
MSTRG.21506	LOC100570527	uncharacterized LOC100570527	12057	10254	6993	9178	8441	9590	8913	7084	10142	6142	10683	9005	6413	8665	8088
MSTRG.12630	LOC100162337	uncharacterized LOC100162337	12051	15133	4642	3018	2439	11769	7885	5036	2580	2444	11878	7554	4053	3073	3497
MSTRG.16588	LOC100161058	v-type proton ATPase subunit H-like	12039	10480	7353	9611	8461	10727	9800	7408	9453	5403	11299	8416	7118	7649	8768
MSTRG.15166	LOC100159279	alpha-actinin, sarcomeric-like	12033	7030	4587	7165	6412	10517	5991	4745	7770	12614	10191	6672	6087	7128	6229
MSTRG.13142	LOC100571840	uncharacterized LOC100571840	12026	12244	7444	6620	7344	11332	10990	8182	6803	5467	10974	9308	6149	5888	7288
MSTRG.4818	LOC100164964	pyridoxine-5'-phosphate oxidase-like	12026	11105	7542	7598	6980	10157	9928	7416	7617	4248	11146	10385	6477	5863	6034
MSTRG.14753	LOC100164668	LETM1 and EF-hand domain-containing protein anon-60Da, mitochondrial-like	11995	11547	8617	13172	11111	9920	10151	9723	14288	8530	10202	10232	7215	12622	10558
MSTRG.9076	LOC100166799	uncharacterized LOC100166799	11986	14530	16591	23082	16282	10149	13795	17115	23248	10094	11249	13886	15085	19810	17580
MSTRG.91	LOC100162552	filamin-A-like	11921	9845	8148	4685	7975	9781	6832	8466	4353	5469	16195	6785	8887	3585	7766
MSTRG.2912	LOC100158710	ras-related protein Rab-1A-like	11877	14415	4349	8276	10152	11057	5597	5129	7126	4247	12297	4658	10614	6630	11333
MSTRG.12972	LOC100168068	2-oxoglutarate dehydrogenase, mitochondrial-like	11834	10531	8890	9255	8138	10579	10809	9786	10302	10358	9288	7923	8221	7416	9174
MSTRG.9780	LOC100160852	uncharacterized LOC100160852	11782	14506	15593	22521	15655	10080	14509	16900	23076	8218	11150	14352	14197	19198	16263
MSTRG.12616	Tomm20	translocase of outer mitochondrial membrane 20 homolog	11757	12960	9320	7293	9597	11307	10646	9624	6627	7067	11672	10186	9724	5625	8217
MSTRG.4857	LOC100159425	eukaryotic translation initiation factor 3 subunit 2 beta-like	11745	14488	16456	23547	20464	9935	13398	16999	24196	13799	11816	14335	15769	20614	18141
MSTRG.20006	LOC100159381	eukaryotic translation initiation factor 3 subunit D-like	11710	14403	13594	14488	11547	9847	13136	14536	14719	5773	10980	10820	13545	11206	10997
MSTRG.13759	LOC100163116	ADP-ribosylation factor 1-like	11692	13413	12494	15926	13904	10293	12185	13304	15861	6582	11520	11297	11888	12876	13800
MSTRG.2415	LOC100159138	amino acid transporter	11682	13211	10448	5652	5852	10677	14816	11851	5265	6343	12534	9533	6612	3466	5414
MSTRG.20032	LOC100159024	uncharacterized LOC100159024	11680	7343	484	123	652	12318	2691	424	69	40	12908	5861	727	51	343
MSTRG.11087	LOC100160359	uncharacterized LOC100160359	11674	15110	17777	28454	22363	9867	13409	18945	26871	16096	10433	12198	15223	25016	21208
MSTRG.10504	LOC100166971	Phenylalanine 4-monooxygenase; PAH	11656	15657	9072	4738	8741	11013	15848	11323	4607	8627	16205	10131	7083	3116	5959
MSTRG.17352	LOC100161670	AH receptor-interacting protein-like	11651	10476	4713	4426	6301	11704	7217	4817	4053	3290	11015	6977	4711	3156	6095
MSTRG.7588	LOC100160447	uncharacterized protein CG1785-like	11650	13048	12538	18759	15538	9721	11602	14233	20341	8937	10596	14777	10953	18954	16396
MSTRG.5497	LOC100163072	dolichyl-diphosphooligosaccharide--protein glycosyltransferase subunit STT3B-like	11634	11257	9637	8681	9740	10344	10648	9709	8302	5064	10633	9899	10041	6817	9365
MSTRG.6233	LOC100161931	uncharacterized LOC100161931	11618	14106	13378	11348	10860	10061	12593	13315	9434	10264	11288	13320	16535	9730	11438
MSTRG.19908	LOC100166856	probable ATP-dependent RNA helicase DDX27-like	11574	13874	13443	16367	13724	9412	13115	13649	16682	8422	10725	14547	13191	14748	11781
MSTRG.11095	Ndufb8	NADH dehydrogenase [ubiquinone] 1 beta subcomplex subunit 8, mitochondrial	11523	10925	6557	6241	6979	9496	8690	6444	5702	6957	11194	8749	6276	5605	5936
MSTRG.7337	Shmt1	serine hydroxymethyltransferase 1 (soluble) (EC:2.1.2.1), glycine hydroxymethyltransferase; SHMT1	11481	11765	9604	14903	8711	10120	10407	11949	14390	5215	11437	10560	7972	12196	11911
MSTRG.12671	LOC100164410	AFG3-like protein 2-like	11479	10357	7812	8391	7966	9787	9491	8614	7850	5543	9253	8559	8406	6902	7393
MSTRG.15263	LOC100169390	heterogeneous nuclear ribonucleoprotein K-like	11450	17606	20727	16718	17676	10465	18715	20775	14723	10033	12199	16045	22717	11229	16679
MSTRG.7045	LOC100160559	6-phosphofructo-2-kinase/fructose-2,6-biphosphatase-like	11441	14760	6435	6418	8696	10145	9034	8120	5964	16396	10691	6699	6220	5791	8424
MSTRG.8784	LOC100144888	vacuolar ATP synthase subunit G-like protein, active transporters; vacuolar ATP synthase subunit G-like protein	11429	9436	6293	9529	8639	9936	8083	6868	10015	5216	11732	9784	5582	8969	7881
MSTRG.6826	LOC100572399	uncharacterized LOC100572399	11416	6768	483	595	2349	11642	2378	524	471	788	13327	5322	735	285	1072
MSTRG.19018	LOC100160876	phosphatidylinositol 3-kinase regulatory subunit beta-like	11397	12968	14368	22490	17163	9408	11881	14753	21984	10012	9628	12725	13788	19778	16970
MSTRG.20784	Hadh	L-3-hydroxyacyl-Coenzyme A dehydrogenase (EC:1.1.1.35)	11394	10112	7066	10024	9956	9913	8960	7721	11639	9713	10186	8795	6634	9346	9433
MSTRG.17670	LOC100570856	glutathione S-transferase-like	11361	4897	3170	2836	2357	12934	4890	3086	4383	3632	11905	6523	5269	3413	2637
MSTRG.7357	LOC100161612	GTP-binding protein SAR1b-like	11340	12112	10390	14635	14444	10200	10887	10653	14053	10122	11074	9940	9356	12267	13075
MSTRG.21428	LOC100163409	cytochrome b-c1 complex subunit 6, mitochondrial-like	11321	11371	8258	8939	10345	9940	9191	8338	9953	7899	10702	10127	7211	8916	9431
MSTRG.21857	LOC100164372	muscular protein 20	11277	9652	1780	606	2596	10583	5058	1936	352	1608	17764	7213	1603	384	1585
MSTRG.18752	LOC100165036	ubiquitin-like modifier-activating enzyme 1-like	11264	13547	14990	20477	13580	9538	13181	17020	20153	6872	9954	10567	15149	15821	17202
MSTRG.16432	LOC100168973	eukaryotic translation initiation factor 3 subunit H-like	11244	14799	15882	16805	14336	9704	14851	15712	16983	8727	11204	13394	15498	14192	13682
MSTRG.10324	LOC100165610	v-type proton ATPase subunit C-like	11206	9414	5771	7167	6039	9951	7685	6058	6878	3297	10322	7152	5335	5432	6682
MSTRG.20567	LOC100165729	translocon-associated protein subunit alpha-like	11184	11013	10304	13105	13911	9767	11406	10584	12498	6015	10080	9353	9167	9974	10828
MSTRG.19770	LOC100164936	heterogeneous nuclear ribonucleoprotein 27C-like	11165	13913	15844	20057	14862	9065	13101	17369	19483	8780	8707	10250	14577	14413	15149
MSTRG.12179	LOC100167620	multidrug resistance-associated protein 1-like	11145	11991	8940	10568	8944	10100	9868	9600	10303	6341	9263	7642	7973	8884	9395
MSTRG.19426	LOC100162858	ribosome biogenesis protein NSA2 homolog	11140	12874	12693	16977	15750	9455	11813	13137	17475	13060	10951	13193	13277	16932	16447
MSTRG.2022	LOC100573761	uncharacterized LOC100573761	11123	9181	5861	4289	7310	10730	9533	8319	3313	7695	12228	8113	6955	2737	8931
MSTRG.17272	LOC103310335	#N/A	11112	13133	13123	16345	13670	9545	12644	14150	15388	8469	9685	11558	14186	13437	13674
MSTRG.10420	LOC100159087	uncharacterized LOC100159087	11103	4770	591	359	482	12263	2789	718	269	227	16191	6337	1017	292	133
MSTRG.15229	LOC100165765	UDP-N-acetylglucosamine--peptide N-acetylglucosaminyltransferase 110 kDa subunit-like	11102	14594	15981	24890	16522	11677	12576	17844	20367	14722	10793	9676	13492	17041	18472
MSTRG.13957	LOC100167522	adenosine kinase 2-like	11091	11122	8625	12031	8036	9019	9984	9660	12076	3712	9283	9803	7191	10214	8916
MSTRG.15958	LOC100160116	NADH:ubiquinone oxidoreductase NDUFB5/SGDH subunit-like	11087	10596	7380	11170	9262	9327	8500	8366	11984	6865	10745	9044	7000	10143	9968
MSTRG.15582	Hspe1	heat shock 10kDa protein 1	11086	12558	11169	17619	13794	9613	10903	11781	19750	8679	11839	11620	9376	15913	14419
MSTRG.9546	NV4	#N/A	11046	11465	7899	9143	5999	8144	10893	7111	10736	3878	10416	8881	4784	8830	6031
MSTRG.3327	LOC100160034	phenoloxidase subunit A3-like	11016	12885	7892	4082	2823	13650	10075	6949	3380	2304	8074	8562	7248	3614	3111
MSTRG.12781	Ctsf	cathepsin F (EC:3.4.22.41)	10990	16742	8916	17265	21894	10906	10611	11278	16994	30505	10626	8572	8945	18785	17914
MSTRG.19107	LOC100159524	uncharacterized LOC100159524	10969	13641	13986	17175	13587	9383	11939	14087	16146	8972	11901	11942	15331	14413	13373
MSTRG.995	LOC100165283	bifunctional aminoacyl-tRNA synthetase-like	10940	12252	11088	11207	10452	9232	10907	10761	10301	6521	9945	9761	10832	8742	9771
MSTRG.11072	LOC100169125	membrane-bound alkaline phosphatase-like	10922	3806	1932	2108	1838	9430	6875	2321	1794	1767	10692	6622	7314	960	2242
MSTRG.15600	LOC100161542	serine/threonine-protein phosphatase 2A 65 kDa regulatory subunit A alpha isoform-like	10896	11940	13169	16039	13046	9801	11192	13403	14756	7765	10032	10558	13461	12356	13257
MSTRG.5978	LOC100169571	lactase-phlorizin hydrolase-like	10870	34199	7819	3463	2132	11523	17212	7676	2134	947	11913	12141	4468	3048	3145
MSTRG.13643	LOC100161617	uncharacterized LOC100161617	10798	16046	6273	9451	14650	9703	8303	7062	7380	9705	10859	7510	6220	8627	16126
MSTRG.19857	LOC100162331	dihydrolipoyllysine-residue succinyltransferase component of 2-oxoglutarate dehydrogenase complex, mitochondrial-like	10755	11047	8168	7013	8389	10150	9950	8527	7206	8607	11690	9559	8697	6027	7356
MSTRG.10690	Eif3f	eukaryotic translation initiation factor 3 subunit F (EC:3.4.19.12)	10742	13535	14358	21209	15993	9376	12568	15857	21140	7562	10868	12783	13077	17930	16951
MSTRG.7807	LOC100168194	bifunctional purine biosynthesis protein PURH	10735	11474	8826	9609	7765	8774	9622	9019	8814	4225	9571	9846	8541	7231	7437
MSTRG.16295	LOC100163171	flavin-containing monooxygenase FMO GS-OX3-like	10699	15214	4372	9552	9445	10214	9153	5636	6363	7161	6536	7431	6253	10720	9062
MSTRG.16592	LOC100162256	MCT, pyruvate cytoplasm transporter	10698	10323	8713	6364	7935	9758	10087	8694	5678	7453	10011	7513	9494	5319	8186
MSTRG.5867	Uqcrq	ubiquinol-cytochrome c reductase, complex III subunit VII, 9.5kDa	10658	9680	6574	5616	7744	8978	8161	6465	6321	6996	10552	8961	7188	5588	6232
MSTRG.12913	LOC100169539	uncharacterized LOC100169539	10654	13078	12023	14357	12408	9396	11671	12217	13921	7538	9552	11520	11737	12555	11189
MSTRG.18330	LOC100165919	active transporters; putative vacuolar ATP synthase proteolipid subunit; hypothetical protein	10637	9851	6141	6674	5593	9493	8532	6422	6625	3660	10693	7711	6048	5791	5091
MSTRG.21521	LOC100163362	serine/threonine-protein phosphatase PP1-alpha catalytic subunit-like	10635	12291	10849	9420	9038	9447	11011	11753	8420	8270	10175	8963	10781	7261	9653
MSTRG.12287	LOC100168755	possible pseudogene or miscRNA, No KEGG entry	10611	14281	5512	5873	8384	9385	8300	6856	5563	5608	9478	6614	4673	5014	9502
MSTRG.8913	LOC100164380	peptide methionine sulfoxide reductase-like	10586	8918	4289	6195	5019	10023	6006	4605	6893	3498	10144	7738	4520	5319	5869
MSTRG.15867	Catb-1418	cathepsin B-1418	10581	1141	1592	1149	448	7737	4010	1736	1756	239	7941	5787	3936	932	893
MSTRG.14270	LOC100163600	probable multidrug resistance-associated protein lethal(2)03659-like	10576	10466	5438	4784	3733	9261	7683	5244	5149	2118	7871	6426	3950	3626	4202
MSTRG.10932	LOC100168202	protein disulfide-isomerase A6-like	10548	11098	8523	7337	8910	9828	9936	8712	6812	5489	9686	8603	9135	5644	8569
MSTRG.5621	LOC100165216	THO complex subunit 4	10506	14745	15264	12815	13623	9510	13552	15423	11962	10439	10223	12971	12996	9983	13186
MSTRG.22061	LOC100166959	3-oxoacyl-[acyl-carrier-protein] reductase-like	10483	5156	3860	3810	3010	17331	4665	3494	5303	2725	13942	7912	3954	3814	3824
MSTRG.20950	LOC100162476	programmed cell death protein 4-like	10459	15092	11909	12388	13212	10074	11186	12561	11280	12796	11398	9004	12328	10842	13992
MSTRG.5008	LOC100570390	fatty acid synthase-like	10457	9115	11250	7607	5840	12678	17765	11640	7339	6460	10401	8821	8586	5217	9429
MSTRG.9980	LOC100166582	CG13240-like	10442	10962	7741	8276	8452	8783	8625	7642	8992	7009	10074	9248	6997	8523	7742
MSTRG.15927	Rtnl1	reticulon 1	10399	11806	9101	11208	11312	10359	9358	10216	10590	6491	10275	8100	8657	9047	11115
MSTRG.19388	LOC100165931	ubiquilin-1-like	10380	10836	8535	10085	8382	9170	9226	9394	9518	5519	8689	6791	8663	7405	8190
MSTRG.17400	LOC100163538	complement component 1 Q subcomponent-binding protein, mitochondrial-like	10372	12203	11368	17673	13127	8645	10811	12138	18906	7145	9754	11190	9595	15356	14375
MSTRG.8022	LOC100164335	microtubule-associated protein RP/EB family member 3-like	10349	12243	12812	12351	13365	9342	10915	12345	11299	8596	9856	11015	14169	9667	11017
MSTRG.16083	LOC100164694	uncharacterized LOC100164694	10326	13197	14540	18482	16413	9632	12269	14894	15438	13335	9187	10133	12888	15812	15192
MSTRG.21245	LOC100159021	peroxidase-like	10322	10366	4444	7960	9537	8440	6736	4960	7402	4421	9068	5755	3808	5951	9091
MSTRG.17482	LOC100158991	alpha,alpha-trehalose-phosphate synthase [UDP-forming] A-like	10306	8380	4946	6117	6379	9462	7263	5707	7245	5509	9132	5770	4814	5329	6716
MSTRG.10712	LOC100165726	thyrotropin-releasing hormone-degrading ectoenzyme-like	10305	6355	2721	1699	996	8973	7391	3792	1794	1598	14446	7905	6593	1132	1707
MSTRG.13750	LOC100168472	uncharacterized LOC100168472	10293	13754	15641	14625	15567	9115	14719	16459	13359	11804	9158	12066	18045	11222	15450
MSTRG.9004	LOC100168320	proteasome subunit alpha type-5-like	10293	12172	14601	18843	15245	9322	12034	14587	19470	8568	9696	12036	13388	16855	15373
MSTRG.9134	LOC100165102	methylthioribose-1-phosphate isomerase-like	10283	10216	6338	7445	7763	8517	7336	7157	7987	5056	8788	6300	5671	5404	7375
MSTRG.16751	LOC100160440	uncharacterized LOC100160440	10277	9688	6138	3675	5968	12394	8300	6096	3812	9155	7946	7976	6989	3121	4827
MSTRG.10136	LOC100167575	peroxisomal multifunctional enzyme type 2-like	10266	8313	7645	9650	9496	10463	8973	7291	9991	7556	9038	8236	7560	7689	8154
MSTRG.16230	LOC100162888	uncharacterized LOC100162888	10259	11566	10547	12706	11600	8798	9953	10396	11887	10167	8563	10521	11050	11415	11275
MSTRG.19391	LOC100166610	uncharacterized LOC100166610	10257	10837	8241	11120	11529	9470	8610	8577	9817	8458	9822	7635	8205	8639	10425
MSTRG.1845	LOC100165657	trifunctional enzyme subunit alpha, mitochondrial-like	10257	10297	7000	7509	8316	8996	8466	6970	7725	8780	8899	7374	6484	6177	6702
MSTRG.9952	LOC100162401	uncharacterized LOC100162401	10244	14969	17391	20224	14730	8853	14189	17131	24744	7837	10306	12987	16717	19310	14575
MSTRG.9302	LOC100166254	possible pseudogene or miscRNA, No KEGG entry	10244	11129	11447	16965	13802	8264	11333	12905	16749	7518	9542	10570	11203	14141	13727
MSTRG.8161	Eif3k	eukaryotic translation initiation factor 3, subunit K	10224	13803	14529	19851	16389	9043	12803	15752	20483	9472	11295	14064	14034	18206	16911
MSTRG.16028	LOC100160488	4-hydroxybutyrate coenzyme A transferase-like	10215	8252	5863	5191	6098	9975	9137	5862	5241	8256	9880	6483	5327	4788	5545
MSTRG.17357	LOC100165578	helicase domino-like	10181	13305	15290	23177	16750	8879	11954	16672	22190	13375	8084	9174	12479	14575	17149
MSTRG.17632	LOC100166222	proteasome subunit alpha type-like	10177	13596	14250	16536	14784	8960	12272	13995	16165	7655	9800	13252	12834	13663	13229
MSTRG.19812	LOC100166483	zinc finger RNA-binding protein 2-like	10139	12198	11187	14359	11168	9049	10555	12215	12811	7838	9143	9134	9349	10812	12062
MSTRG.10120	LOC100167948	uncharacterized LOC100167948	10131	11296	3210	764	2181	8225	5466	3134	1308	2272	8071	5178	2743	1171	2216
MSTRG.16998	LOC100169040	heterochromatin protein 1-like	10075	14165	17239	18372	15763	8483	13645	17358	15972	9683	9723	11575	17795	13313	14377
MSTRG.3129	LOC100166119	twitchin-like	10075	3775	723	579	6915	7495	3231	1015	957	4530	8224	3691	609	575	4413
MSTRG.13897	LOC100159845	26S proteasome non-ATPase regulatory subunit 14-like	10034	12992	13367	17185	13544	9380	12003	13742	17350	8774	9421	10319	12448	14277	13444
MSTRG.16185	LOC100159806	succinyl-CoA:3-ketoacid-coenzyme A transferase 1, mitochondrial-like	10033	9406	6120	7117	6467	8752	7726	6223	7449	4955	8850	7663	6192	6627	5491
MSTRG.7930	LOC100160914	proline dehydrogenase 1, mitochondrial-like	10020	11922	9088	9464	8518	9499	9583	9189	8187	6702	9391	7325	7822	7013	9049
MSTRG.6646	LOC100159461	MFS-type transporter C6orf192 homolog	10018	13811	3484	1872	2613	8494	6717	3627	1446	2333	9068	5348	3356	1580	3967
MSTRG.221	LOC100164423	28 kDa heat- and acid-stable phosphoprotein-like	10014	13450	12883	17003	15797	8749	11497	13158	16678	8754	10138	12521	12341	15629	13227
MSTRG.18699	LOC100165010	coiled-coil domain-containing protein 72-like	10007	11531	11102	18077	15261	7683	10679	11699	19433	8729	9216	12045	10413	18464	15123
MSTRG.11466	LOC100158954	lysosomal alpha-mannosidase-like	10000	14868	2997	1140	1320	8624	8225	4103	1528	730	10995	5141	2211	1432	2364
MSTRG.20620	LOC100167020	C-1-tetrahydrofolate synthase, cytoplasmic	9994	12952	6985	6725	5025	8483	9752	7209	6199	2426	8908	7635	5659	5418	4877
MSTRG.9425	LOC100162413	eukaryotic translation initiation factor 1A-like	9987	11758	12186	19573	18743	8803	10379	13513	21235	14261	9751	12267	12224	20304	18357
MSTRG.2889	LOC100167645	uncharacterized LOC100167645	9984	4616	1351	448	2954	9062	3363	1288	372	999	13069	3814	824	353	1955
MSTRG.12033	Rad23	rad23 protein	9972	12306	14249	19024	14625	8319	12028	14758	19654	7197	9875	10650	12483	15258	14601
MSTRG.12112	LOC100159152	proton-coupled amino acid transporter 4-like	9967	14477	4533	2526	3383	9042	9019	5561	1768	3896	9317	5809	4744	1599	5235
MSTRG.17630	LOC100168905	lysyl-tRNA synthetase-like	9962	11821	13581	16038	13309	8767	11501	13637	15054	7880	8886	10441	13241	13156	11820
MSTRG.17368	LOC100158907	protein KIAA0664 homolog	9958	9172	7836	11519	9695	9427	8519	7922	11836	5779	8339	7845	5643	9747	10383
MSTRG.16354	LOC100163074	26S protease regulatory subunit 6A-like	9955	11918	12947	17972	14487	9198	11000	13780	18814	7945	9592	10191	13175	14008	13055
MSTRG.21311	LOC100162209	uncharacterized LOC100162209	9931	13634	3581	2632	2845	8699	7249	5136	2070	3931	9249	6647	2384	3289	3850
MSTRG.13160	LOC100163013	#N/A	9925	13957	16649	24906	19038	9384	13036	18122	22468	15181	9839	11668	16634	19997	20396
MSTRG.21700	LOC100161364	proteasomal ubiquitin receptor ADRM1 homolog	9923	11742	12938	20184	15798	9410	11116	14033	20480	8963	9990	10371	12555	16105	14423
MSTRG.6020	LOC100166261	hypoxia up-regulated protein 1-like	9914	8160	5895	8303	8141	8162	7318	6174	9168	5356	9629	8188	5657	8369	7521
MSTRG.17225	#N/A	#N/A	9874	7463	2776	1922	2223	9410	5892	3409	2025	3685	8354	7351	3437	2003	2729
MSTRG.2064	LOC100160178	uncharacterized LOC100160178	9860	12019	11378	19512	13124	8216	8542	12647	16768	10813	9350	10857	9738	19505	12608
MSTRG.9652	LOC100571036	v-type proton ATPase subunit e 2-like	9854	8824	6073	8675	8093	8746	7086	6264	9625	5193	9334	8108	5786	8335	7996
MSTRG.17215	LOC100158835	possible pseudogene or miscRNA, No KEGG entry	9852	10397	10585	15448	13518	8716	9950	11850	15726	7182	8945	10190	10180	13908	12698
MSTRG.17412	LOC100165638	histone acetyltransferase MYST4-like	9836	14351	13929	16790	15099	9381	12145	15159	15178	13994	9404	11416	12192	15405	15570
MSTRG.7051	LOC100164449	tumor protein D54-like	9832	10700	9189	12334	12070	7522	8337	8747	10084	8910	9015	8059	8187	10666	11768
MSTRG.9853	LOC100160152	uncharacterized protein LOC100160152	9828	16026	6139	1084	2207	8748	14174	6676	837	2599	15183	8988	5668	936	2366
MSTRG.14204	LOC100166548	coatomer subunit alpha-like	9825	10856	7863	5035	7031	9626	9799	8670	4170	4449	9577	8970	10037	3442	7257
MSTRG.18482	LOC100159145	acyl carrier protein, mitochondrial-like	9812	9415	6832	9628	9116	8535	7817	7012	10453	7615	8924	7947	5974	9416	9143
MSTRG.17297	Ndufb10	NADH dehydrogenase (ubiquinone) 1 beta subcomplex, 10, 22kDa	9807	8726	6444	8037	8025	8248	8037	6704	8536	6494	9019	7645	6215	7756	7147
MSTRG.5587	LOC100159317	influenza virus NS1A-binding protein-like	9803	11135	9417	11884	9998	8586	9505	10610	10936	8067	7959	6584	7073	8388	9263
MSTRG.8706	LOC100165393	uncharacterized LOC100165393	9798	3280	397	182	1058	10278	1786	618	103	172	14262	4274	690	177	369
MSTRG.1257	LOC100165138	plasma membrane calcium-transporting ATPase 3-like	9785	9490	5631	5136	9762	14252	7903	7088	4032	6453	13214	8213	6927	2966	7208
MSTRG.7856	Paip2	polyA-binding protein interacting protein 2	9783	11071	7430	8438	8851	8464	9678	9042	10958	6551	8467	7404	6550	7234	8666
MSTRG.10132	LOC100168279	hypoxia up-regulated protein 1-like	9764	10075	9863	13719	14436	10002	10087	9952	15452	6186	9962	8317	7208	12544	14443
MSTRG.18916	Zc3h15	zinc finger CCCH-type containing 15	9760	11226	11653	17483	14307	8658	10531	10426	17215	8683	8881	12522	10475	16730	13959
MSTRG.8170	LOC100164236	NHP2-like protein 1	9739	14909	15399	22838	17179	8042	14965	18467	20908	8319	11763	17162	15312	19833	16555
MSTRG.9276	LOC100164683	proteasome subunit alpha type-1-like	9727	11702	11161	9519	9600	8117	11093	10560	8197	6693	8777	10494	12483	7456	8935
MSTRG.21043	LOC100165492	proteasome subunit alpha type 6-like	9704	12612	12958	19821	16224	8059	11648	14658	23700	9161	9252	12419	11704	19103	17203
MSTRG.8561	LOC100163676	acyl-CoA-binding domain-containing protein 2-like	9671	10044	8298	14180	11652	9106	9326	9376	15715	5699	9341	10068	7719	12880	12568
MSTRG.9712	LOC100571140	inorganic pyrophosphatase-like	9660	10393	8505	10933	7921	7593	8588	9014	11440	4637	7912	7489	7469	8734	8962
MSTRG.9714	LOC100159757	inorganic pyrophosphatase-like	9585	10210	7976	12205	9081	7851	8154	8994	13827	5170	8873	9058	6663	11791	9852
MSTRG.18544	LOC100167906	glutathione S-transferase (EC:2.5.1.18)	9575	7042	4084	7623	18077	9061	5415	4398	8126	10562	10082	5908	3908	6646	11049
MSTRG.12003	LOC100163800	protein transport protein Sec61 subunit gamma-like	9553	11743	9858	13354	13645	8402	10171	10423	13347	7035	9468	10844	8364	12721	13402
MSTRG.3012	LOC100573388	cytochrome c oxidase subunit 7C, mitochondrial-like	9550	10122	7536	11007	8700	7980	8509	7890	11822	4569	9649	9339	6206	10885	8903
MSTRG.17940	LOC100161188	platelet glycoprotein V-like	9549	10255	5639	2957	5086	8374	9673	6032	2396	6900	10772	8094	4833	2057	4299
MSTRG.11720	LOC100161110	uncharacterized protein LOC100161110	9547	14416	5114	3676	3086	7585	8801	6289	3096	1651	9231	7827	3827	3765	3538
MSTRG.18410	LOC100160261	uncharacterized LOC100160261	9543	13695	6444	7841	10047	8281	7832	7013	7219	15654	9252	5994	5258	6511	10491
MSTRG.13924	LOC100160889	#N/A	9513	11316	5557	7737	11417	9819	7361	5908	7578	6462	9686	7707	4935	6542	9102
MSTRG.15114	LOC100165303	uncharacterized LOC100165303	9511	12080	11515	9510	9153	8335	11335	12067	8408	8850	7907	7865	12941	7285	10547
MSTRG.18208	LOC100159541	acyl-CoA synthetase short-chain family member 3, mitochondrial-like	9452	7821	3627	2624	2939	10516	7361	3283	2720	4644	7117	5991	3335	2519	3909
MSTRG.20780	LOC100164192	collagen alpha-2(I) chain-like	9436	9740	1443	1152	2143	9059	6023	2100	846	865	9436	4482	1278	677	2087
MSTRG.9688	LOC100161240	zinc finger protein 512B-like	9428	19330	11510	3901	6813	11114	25498	12817	1799	8879	38282	14271	8540	2155	5975
MSTRG.21513	LOC100164047	ubiquitin-conjugating enzyme E2I-like	9417	6790	5484	10558	10238	8158	10279	10610	9884	6917	9414	9603	10320	9347	9843
MSTRG.344	LOC100165866	possible pseudogene or miscRNA, No KEGG entry	9383	13503	3684	2700	9442	9464	7167	5163	1514	22562	13031	6087	3537	2683	8429
MSTRG.15549	LOC100162453	ubiquitin carboxyl-terminal hydrolase 14-like	9378	10946	11972	14254	10653	8801	10306	12290	14087	6115	8793	9175	10820	11002	10029
MSTRG.9890	LOC100165622	#N/A	9359	10552	12116	10732	8819	7806	9467	12203	9401	5695	7212	6188	8806	8526	8384
MSTRG.12587	LOC103307621	#N/A	9310	12189	12129	11754	11531	8435	11512	12469	10609	9484	8918	11754	12868	10304	10874
MSTRG.7376	UQCR11	UQCR11	9272	7925	6190	8569	8121	6986	6692	6917	9791	6287	7894	7786	4870	8628	8202
MSTRG.20303	LOC100572989	probable ATP-dependent RNA helicase pitchoune-like	9245	10899	11051	14534	11873	8654	9710	11564	13825	10218	9082	9631	9888	12802	12165
MSTRG.6536	LOC100161333	protein RCC2 homolog	9231	17641	21575	20924	17032	7925	18681	23503	20645	14098	8883	14950	25050	17493	19254
MSTRG.3168	LOC100160421	uncharacterized LOC100160421	9227	4122	450	183	399	11113	2628	723	145	188	12479	5430	793	156	75
MSTRG.7883	LOC100167701	uncharacterized LOC100167701	9215	929	1004	446	358	4181	2878	1447	1369	343	8436	6293	2600	563	576
MSTRG.9848	LOC100162193	uncharacterized LOC100162193	9212	14214	5740	1534	2965	6338	12588	5918	1268	2424	13837	9009	4956	1359	2242
MSTRG.5507	Scsalpha	succinyl coenzyme A synthetase alpha subunit	9195	9147	6537	6520	7415	8547	7751	5836	6844	8318	9306	7380	5609	5454	7048
MSTRG.18892	LOC100164864	uncharacterized LOC100164864	9190	11748	7543	10042	9494	8378	9309	8493	10227	6106	8881	7139	6777	8341	9081
MSTRG.18626	LOC100165305	transcription elongation regulator 1-like	9189	12277	13646	20529	16291	8231	11141	14388	20479	11288	8554	12081	12621	19364	16682
MSTRG.11815	LOC100167023	NADH dehydrogenase [ubiquinone] 1 alpha subcomplex subunit 8-like	9184	8893	5995	5231	6743	7917	7044	5815	5001	6549	9136	7316	6257	4365	5268
MSTRG.15327	LOC100574876	ABC transporter F family member 4	9181	4592	2147	3354	3263	7431	4777	3148	3263	2485	6436	5420	2705	3322	2814
MSTRG.18307	LOC100168821	uncharacterized LOC100168821	9172	10790	11767	14510	10792	8022	10346	12064	14160	6153	7703	9366	10905	11890	11416
MSTRG.19385	LOC100570148	possible pseudogene or miscRNA, No KEGG entry	9168	10182	9484	12146	10064	8134	9050	9687	11463	5979	8041	8965	8589	10211	9186
MSTRG.18359	LOC100163968	serine protease inhibitor 4, serpin-4-like	9166	12352	6063	9050	14458	8842	7517	7937	9726	21630	9175	7740	5483	11079	12354
MSTRG.13283	LOC100169175	probable 26S proteasome non-ATPase regulatory subunit 3-like	9163	10657	10767	10744	9954	9084	10109	10540	9939	5672	9424	9102	11621	8107	9107
MSTRG.20205	LOC100159650	proteasome 25 kDa subunit	9112	10641	12414	18213	13474	8410	10848	12821	18802	7133	8810	10782	10947	15809	14217
MSTRG.6956	LOC100162548	splicing factor 3B subunit 3-like	9094	10847	14317	16242	11791	7902	11492	13608	15192	7623	7277	9354	13306	12991	12691
MSTRG.16950	LOC100160284	NADPH--cytochrome P450 reductase-like	9072	6983	5552	4521	3903	9994	8116	5381	4642	3946	8394	5521	5629	3581	3678
MSTRG.11014	LOC100164577	uncharacterized protein LOC100164577	9063	3731	1922	2645	2005	8185	4503	2275	3909	2932	10495	6614	4771	2398	2433
MSTRG.17629	LOC100165462	3-hydroxy-3-methylglutaryl-coenzyme A reductase	9040	6180	3550	3389	3722	7547	5091	3730	2863	3571	7019	4715	3668	2496	3865
MSTRG.3280	LOC100159935	excitatory amino acid transporter 1-like	9030	10023	3699	3256	4391	8743	6532	4785	2797	2836	8314	5540	3091	2554	4536
MSTRG.404	LOC100164870	uncharacterized LOC100164870	9028	12023	16134	22617	21278	8099	13201	18061	20972	17126	8920	10748	12284	19055	18845
MSTRG.19974	LOC100159564	glycogen debranching enzyme	9026	12907	5803	4947	2620	8175	8406	6599	4549	2481	6679	5520	3570	4202	4568
MSTRG.16357	LOC100158996	diacylglycerol o-acyltransferase-like	9021	10937	4732	4164	5496	7345	6466	5578	3974	9179	8239	5231	4009	4600	4732
MSTRG.20160	Ndufs8	NADH dehydrogenase (ubiquinone) Fe-S protein 8, 23kDa	8989	7860	5469	8538	7917	7592	6478	6146	9108	6479	8172	6859	5210	8055	7640
MSTRG.12294	LOC100159103	membralin-like	8985	10436	10372	13284	10725	8494	9154	11251	12211	7653	8595	8290	10016	10147	11072
MSTRG.15864	LOC100162324	peptidyl-prolyl cis-trans isomerase FKBP2-like	8974	8579	3969	2749	4957	8310	5511	3728	2489	3592	8321	5457	3673	2340	4283
MSTRG.10215	LOC100159019	putative aldehyde dehydrogenase family 7 member A1 homolog	8959	10088	5011	5784	4507	7606	7464	5952	5840	5799	8161	6710	4148	6045	4426
MSTRG.2389	LOC100160275	eukaryotic initiation factor 4A-III-like	8949	11982	15086	20827	15995	7914	11764	15724	20395	8127	8631	10097	14471	17439	15812
MSTRG.14087	LOC100165090	ATP-binding cassette sub-family D member 3-like	8947	8012	5862	7472	5662	9316	6754	5223	8296	3673	6357	6202	4592	6928	6259
MSTRG.6827	LOC100160579	probable histone-binding protein Caf1-like	8933	12345	17636	20165	14913	7522	12098	17783	19505	9105	8180	10573	17564	16141	14990
MSTRG.13516	LOC100164721	STE20/SPS1-related proline-alanine-rich protein kinase-like	8923	7894	7343	9056	8571	7365	7238	7694	9409	6007	7363	6800	6972	8085	7083
MSTRG.1993	LOC100166892	5'-nucleotidase	8919	8580	3711	3341	3797	7741	7508	5056	3338	5294	7403	6268	3868	2741	4023
MSTRG.16887	LOC100168697	TFIIA-alpha and beta-like factor-like	8895	9601	7415	7687	7309	7917	8885	7546	7082	6748	7568	7147	7523	6354	6207
MSTRG.7600	LOC100159764	probable medium-chain specific acyl-CoA dehydrogenase, mitochondrial-like	8891	8433	5239	6555	9714	7855	6424	5810	7138	11298	7872	5720	4838	6113	6519
MSTRG.21171	LOC100159184	membrane metallo-endopeptidase-like 1-like	8880	7796	2813	1776	1125	9356	8457	5186	1300	952	7453	6361	3830	1143	1699
MSTRG.21532	LOC100159841	probable 4-coumarate--CoA ligase 3-like	8877	8863	5475	3127	4057	8374	8064	4674	3409	2453	8457	7412	4729	2818	3086
MSTRG.17464	LOC100165140	dnaJ protein homolog 1-like	8876	11011	10132	13702	11956	7388	9737	11392	12591	9361	8816	10353	9234	11086	11438
MSTRG.13761	LOC100165202	26S protease regulatory subunit 8-like	8874	10984	11815	16346	13475	8332	9885	13130	16559	7645	8812	9693	11602	13863	12433
MSTRG.19174	LOC100166787	casein kinase I isoform alpha-like	8865	11656	12429	13515	10824	7837	11319	13730	11882	7281	9134	9409	13749	10084	11584
MSTRG.19858	LOC100162960	26S proteasome non-ATPase regulatory subunit 12-like	8849	9342	10365	15384	11707	7579	9055	11473	15148	6685	7818	8517	9178	12834	11390
MSTRG.12297	LOC100167444	probable NADH dehydrogenase [ubiquinone] iron-sulfur protein 7, mitochondrial-like	8843	8397	5953	5877	6711	8127	7351	5860	5464	5895	8141	7555	5554	5264	5223
MSTRG.13980	LOC100167863	uncharacterized LOC100167863	8834	3799	414	274	350	9796	2488	738	179	166	12267	5119	784	223	113
MSTRG.17339	LOC100165847	ubiquitin/ribosomal protein S30e fusion protein-like	8829	12048	12320	15947	15514	7765	10617	12662	17050	8258	9243	13281	10848	15352	13763
MSTRG.16679	LOC100168508	ATPase family AAA domain-containing protein 3-like	8804	7411	6874	8845	6980	7640	7686	7381	9248	3032	7204	7655	6196	7248	6497
MSTRG.19688	LOC100159637	fatty acyl-CoA reductase 1-like	8790	18885	10751	9059	6920	9157	13283	6332	7561	13418	8778	13014	9993	8853	5217
MSTRG.4833	LOC100165200	NADH dehydrogenase [ubiquinone] 1 beta subcomplex subunit 4-like	8773	8408	6058	8493	8565	7455	6788	6159	9905	6448	8479	7109	4966	8106	8302
MSTRG.5596	Ola1	Obg-like ATPase 1	8772	21139	9822	13685	11432	7603	8546	10564	13606	5924	7481	8716	8926	11186	10646
MSTRG.8038	LOC100167781	uncharacterized LOC100167781	8759	7255	2851	756	6468	5953	4391	2648	1468	3276	6852	3637	2115	1033	4545
MSTRG.1716	LOC100161765	profilin-like	8754	11676	10743	14300	11720	7767	10246	11690	12611	6780	8026	8010	10281	9984	11837
MSTRG.11788	LOC100166826	ATP-binding cassette sub-family G member 4-like	8741	8915	5252	4962	6502	8722	7583	5648	4731	8155	7895	6030	4631	4354	6080
MSTRG.9724	LOC100165582	3-hydroxyisobutyryl-CoA hydrolase, mitochondrial-like	8739	8378	3564	3001	4247	7971	5888	4056	2887	3259	8529	5581	3745	2761	2978
MSTRG.8122	LOC100165821	proteasome subunit N3-like	8724	8925	9498	13681	11952	6475	8833	9810	14236	6514	7564	8919	9237	11713	11470
MSTRG.12115	LOC100168251	proton-coupled amino acid transporter 4-like	8709	11991	11355	6746	7182	7693	10700	11225	6118	7251	7797	8689	12386	5750	8322
MSTRG.17459	LOC100161383	ras-related protein Rab-7-like	8703	9898	7914	9658	10144	8202	7842	7689	9015	7727	8296	6771	7038	7714	7983
MSTRG.18244	LOC100164485	solute carrier family 22 member 21-like, Organic acid transporter	8685	6572	3326	2643	3277	6617	4674	3113	3021	3328	8855	4714	3054	2813	3479
MSTRG.17443	LOC100160468	trans-2,3-enoyl-CoA reductase-like	8673	7130	5385	10183	7874	8507	6319	7004	8066	5206	7099	6169	6531	9342	9869
MSTRG.7578	LOC100167928	insulin-degrading enzyme-like	8641	9972	9363	13686	9958	7837	8741	10982	13317	5552	7511	6956	7380	9569	10933
MSTRG.1050	LOC100165680	5-aminolevulinate synthase, erythroid-specific, mitochondrial-like	8601	5032	4583	2582	3395	10523	5070	3304	2685	5602	7770	4608	5411	2648	3587
MSTRG.9378	LOC100161441	eukaryotic translation initiation factor 3 subunit E-like	8597	9846	10628	13970	10740	7153	9935	11109	13841	5379	7821	9519	10468	11651	11221
MSTRG.15087	LOC100165561	ribonucleoside-diphosphate reductase subunit M2	8592	13399	15728	16661	13331	7038	11918	15916	14918	6362	8496	10801	15337	12648	12838
MSTRG.15563	LOC100162526	uncharacterized LOC100162526	8582	8941	8155	10597	9963	8091	8305	8776	9230	7854	7920	7804	7869	10047	9618
MSTRG.8115	LOC100167850	u1 small nuclear ribonucleoprotein 70 kDa-like	8581	10058	13006	15244	13718	7101	11905	13730	14382	8937	8420	10443	12330	13269	13070
MSTRG.14710	LOC100158804	glutaredoxin-like	8551	7010	6783	8505	7934	9129	6354	6770	9046	5618	7150	8334	6017	8011	7824
MSTRG.20748	LOC100165366	serine/arginine-rich splicing factor 3-like	8542	10850	13026	9972	10199	8012	11564	11827	8897	12261	9047	9294	14634	8079	9468
MSTRG.18557	LOC100164626	glutathione S-transferase D4-like	8540	5071	1395	1547	4122	5934	3214	1322	1918	1887	8400	3636	1100	1323	2156
MSTRG.2157	LOC100161601	kinesin heavy chain-like	8538	9842	11046	18089	14933	8180	8824	11674	18367	8762	7865	9512	9908	15768	14366
MSTRG.7875	LOC100302430	kazal-type proteinase inhibitor	8537	7277	2286	3174	8759	9272	4339	3555	2800	7336	11073	4328	2214	3711	5753
MSTRG.10644	LOC100159597	hemicentin-1-like	8525	6622	4429	6413	7094	7573	5948	5917	6146	4464	6900	5642	4241	5183	7187
MSTRG.21647	LOC100162529	leucine-rich repeat-containing protein 58-like	8524	6971	2290	2303	3009	7826	4237	2529	1699	6695	8194	3893	2337	2413	3313
MSTRG.1057	LOC100162654	uncharacterized LOC100162654	8523	10335	13378	27143	20750	9431	11289	13521	28249	14696	9162	10844	11909	25428	7795
MSTRG.20700	#N/A	#N/A	8509	3360	1078	675	745	7757	2938	1668	1088	479	9467	4287	1763	623	723
MSTRG.12341	LOC100162463	mitochondrial inner membrane protein OXA1L-like	8497	8777	6896	8972	8447	7422	7754	7226	9393	4402	8365	7774	6095	8146	7503
MSTRG.8406	LOC100164430	protein regulator of cytokinesis 1-like	8493	9088	10347	14517	9817	6923	7651	11086	14593	5555	6445	8243	8317	12773	10410
MSTRG.10987	LOC100162681	proliferating cell nuclear antigen-like	8486	13556	17778	24230	15081	7311	13138	19251	25440	6178	8549	12845	15673	20391	17129
MSTRG.8868	LOC100159965	alpha-N-acetylgalactosaminidase-like	8478	7524	4507	2647	862	8238	6670	3334	2368	115	5270	5015	3806	1983	1581
MSTRG.11977	LOC100167279	uncharacterized LOC100167279	8465	7932	5976	5863	4857	7398	6635	5866	5794	3242	6078	4478	5262	4303	5301
MSTRG.8099	LOC100169613	glutamate dehydrogenase, GDH [NAD(P)+	8458	5595	4734	3232	4730	8275	5905	4032	4293	2341	5508	3068	5057	3065	5111
MSTRG.7631	LOC100166780	uncharacterized LOC100166780	8446	9300	1861	1012	2296	7779	3763	1699	646	449	8492	4801	1404	652	1194
MSTRG.6307	LOC100168774	possible pseudogene or miscRNA, No KEGG entry	8445	8969	6634	8154	5578	7001	7824	6974	7249	2352	6827	6184	5531	5866	5740
MSTRG.18756	LOC100163695	uncharacterized LOC100163695	8420	9566	11501	20775	19167	8037	8613	11759	19226	13625	7788	8902	11041	19086	16591
MSTRG.14178	LOC100160658	glycerol-3-phosphate dehydrogenase [NAD+], cytoplasmic-like	8420	9289	5774	7608	6991	7528	6880	6365	7765	6770	7503	5847	4802	6315	6588
MSTRG.14864	LOC100159178	lactase-phlorizin hydrolase-like	8409	7651	2300	1694	1532	6508	4075	2824	1470	759	8461	5100	1618	1530	1457
MSTRG.14861	LOC100160785	uncharacterized LOC100160785	8400	14600	4077	2714	1136	7683	8031	4967	2485	723	8860	7250	1985	2445	1781
MSTRG.10291	LOC100159050	phytoene dehydrogenase-like	8400	5491	992	1078	1756	6983	3380	974	863	794	6341	2535	632	746	1477
MSTRG.17209	LOC100162255	proteasome subunit beta type-like	8381	10739	11477	17516	14355	7332	10210	12142	19080	6614	8271	10352	10195	16424	14153
MSTRG.12522	LOC100167897	26S proteasome non-ATPase regulatory subunit 13	8378	10976	11874	18687	14301	8125	10125	12964	19797	8361	8349	10292	10252	17310	16677
MSTRG.13560	LOC100159824	#N/A	8374	10620	13081	18918	13078	7344	9738	14626	18555	6417	7172	8162	12524	15033	14649
MSTRG.7204	LOC100163468	uncharacterized protein LOC100163468	8347	8329	7075	6909	7657	7570	7428	7331	6244	5220	7767	6687	7718	5270	6445
MSTRG.19939	Cathd	cathepsin D (EC:3.4.23.5)	8337	9012	8468	10690	10871	7463	8619	8787	12212	8136	7506	7269	8175	9818	9315
MSTRG.15247	LOC100162958	ankyrin repeat domain-containing protein 11-like	8326	10023	8684	10964	9491	7750	8787	9470	10277	7073	7279	7782	9147	9485	9584
MSTRG.8953	LOC100167717	innexin inx7-like	8323	10378	7883	3601	6029	7728	7411	8278	3064	5688	8204	5733	9032	2741	6403
MSTRG.8553	LOC100168509	AN1-type zinc finger protein 6-like	8319	9320	7699	11828	11588	8033	7459	7828	10870	10533	7911	6183	6993	8846	10191
MSTRG.16132	LOC100168845	uncharacterized LOC100168845	8317	9037	4588	3021	6100	8174	7360	5496	2831	8532	8668	7657	5800	2594	4624
MSTRG.6475	LOC100161243	acireductone dioxygenase-like	8312	9143	5249	6446	5198	7124	6923	5662	6932	3259	7510	7877	4774	6247	5668
MSTRG.13767	LOC100169004	proteasome activator complex subunit 3-like	8307	10135	10087	14689	10607	6932	8912	11281	14578	6181	7594	8537	9301	12605	12386
MSTRG.17033	LOC100163458	eukaryotic translation initiation factor 3 subunit G-like	8300	10461	8762	7290	8189	7204	9271	9575	6363	9706	8798	9049	11007	5717	8238
MSTRG.21095	LOC100163062	hrp65 protein-like	8299	10897	10548	20332	13663	7692	9706	13416	18916	9748	7012	7412	10495	15818	14364
MSTRG.12006	LOC100158974	uncharacterized LOC100158974	8266	7739	4187	8698	10173	8701	4575	3640	8202	5603	6629	4882	4258	7081	8205
MSTRG.7939	LOC100161583	aminomethyltransferase, mitochondrial	8262	7884	3961	2058	2798	6898	6212	4404	1872	2627	7546	5274	2849	1550	2478
MSTRG.7552	LOC100167424	uncharacterized LOC100167424	8261	8085	6490	6718	8080	7902	6350	6464	6799	10067	8381	6276	6321	5922	7466
MSTRG.16103	LOC100162845	uncharacterized LOC100162845	8254	10073	10725	15252	13409	7448	9540	11497	14456	13177	7395	9370	10135	14105	11499
MSTRG.18255	LOC100165831	CCR4-NOT transcription complex subunit 2-like	8243	11789	11091	8201	9912	8412	11135	11201	6727	9823	9192	9621	14990	6025	9063
MSTRG.18670	LOC100161633	probable NADH dehydrogenase [ubiquinone] flavoprotein 2, mitochondrial-like	8235	7115	5432	7648	7717	6618	6127	5832	8909	5845	7124	6246	4734	7172	7366
MSTRG.18228	LOC100168945	rab GDP dissociation inhibitor alpha-like	8227	9865	8822	9077	9857	7766	8662	8990	8526	6505	7898	7327	8909	6808	9249
MSTRG.19283	LOC100162963	solute carrier family 15 member 2-like	8212	11187	3819	2057	2184	7183	6768	4158	1772	947	7269	6102	2687	1642	2980
MSTRG.12625	LOC100168678	putative zinc metalloproteinase T16A9.4-like	8187	7373	5758	4178	4902	6040	7430	4827	4185	3028	7512	6089	5491	3136	3695
MSTRG.17803	LOC100165900	putative phospholipase B-like 2-like	8181	11043	3811	3164	4238	6928	5836	4761	2683	4074	7000	4849	2329	3135	3517
MSTRG.7488	LOC100162035	RING-box protein 1A-like	8176	9726	10522	14603	11813	6751	9393	11030	14882	7287	7806	9403	9808	12648	12550
MSTRG.19632	LOC100160354	peptidyl-prolyl cis-trans isomerase-like	8169	10555	11296	12809	12864	7750	9184	10392	11940	7778	8661	9168	11763	9874	10565
MSTRG.16032	LOC100163657	uncharacterized LOC100163657	8157	9848	10796	16308	13869	7670	8795	10969	15352	11925	7317	8852	10015	14613	13226
MSTRG.4277	LOC100572491	uncharacterized LOC100572491	8135	11755	4139	4670	7421	6627	6017	4766	4254	9931	8998	6537	2688	6063	5228
MSTRG.15284	LOC100166603	uncharacterized LOC100166603	8106	10654	12420	20976	17732	6889	9797	12996	21791	9745	7193	11051	8525	19392	17468
MSTRG.5043	Psmb7	proteasome (prosome, macropain) subunit, beta type, 7 (EC:3.4.25.1)	8086	10005	9010	13130	13223	6219	7659	9800	18015	8379	7598	9842	10306	11971	13180
MSTRG.20987	LOC100166474	annexin IX-like	8077	8368	4577	4016	5894	7823	6587	4872	3828	4937	7976	6687	5907	3616	5289
MSTRG.13345	#N/A	#N/A	8077	6270	5158	6810	6803	5390	5343	5590	7491	5382	7572	6712	4868	6809	6267
MSTRG.10429	LOC100164514	pre-mRNA-processing factor 19-like	8060	10572	14319	21798	14475	6982	10986	15929	21454	5829	7087	9548	12979	16793	15604
MSTRG.8935	LOC100160313	e3 ubiquitin-protein ligase UBR4-like	8058	11870	12345	18810	13692	7726	9623	14046	17091	9062	6773	7319	10069	13917	16075
MSTRG.22127	LOC100160858	uncharacterized LOC100160858	8057	8817	7950	12142	10220	6950	7607	9323	11921	5968	7238	8125	5982	5918	9416
MSTRG.7855	LOC100161401	heterogeneous nuclear ribonucleoprotein 87F-like	8055	9345	8587	7671	7153	6862	9065	8368	7123	4153	7388	7882	8855	5754	6818
MSTRG.1795	LOC100165684	adenylosuccinate synthetase-like	8039	7940	5265	5442	4680	7025	6413	5919	5219	4229	7399	5397	4549	4209	5191
MSTRG.20306	LOC100167834	uncharacterized LOC100167834	8028	10290	12407	25679	18838	8972	10521	13134	24906	12642	8271	10310	12747	24421	19217
MSTRG.20047	LOC103308723	#N/A	8015	8811	7871	7544	6833	7141	8444	8113	6790	4089	6659	7502	8188	5808	5899
MSTRG.7443	LOC100160513	#N/A	8004	7905	6301	4910	7512	6923	6890	6323	4122	6523	7099	6700	6068	3717	6050
MSTRG.6230	LOC100161225	macrophage migration inhibitory factor-like	8003	9707	7618	10976	8664	6519	8040	8069	11030	4625	7460	8195	6504	9927	8413
MSTRG.12362	LOC100169130	probable E3 ubiquitin-protein ligase TRIP12-like	8002	10247	10460	14692	10694	6166	8896	11432	13243	7980	6888	6660	8847	11161	11780
MSTRG.11891	LOC100168890	kiser-like	7999	9230	7957	10698	10324	7530	7125	8273	10367	10101	8027	7459	7285	9478	9843
MSTRG.13752	LOC100159574	26S proteasome non-ATPase regulatory subunit 11-like	7997	9839	10225	13199	10397	7335	9301	10671	12514	7088	7058	7912	9273	10311	10493
MSTRG.9127	LOC100158855	fatty acid synthase-like	7997	5792	4302	5965	5415	7747	6283	4189	5546	3052	5228	4636	2875	4057	7024
MSTRG.18871	LOC100162222	prostaglandin reductase 1-like	7989	8522	4806	5000	3213	6475	7107	4702	5246	2062	7533	6429	3743	4658	3566
MSTRG.21318	LOC100164129	uncharacterized LOC100164129	7967	9287	5278	3958	4226	5501	6254	5825	4621	3762	5876	5170	3893	3428	2817
MSTRG.12175	Accoas	acetyl coenzyme A synthase	7966	3465	1363	1718	1116	6223	3443	1863	2022	1245	5499	3292	1899	1155	1437
MSTRG.20813	LOC100160662	clathrin light chain-like	7942	7775	7567	11549	10960	7064	6448	7947	11227	6374	7728	7734	7342	9972	9728
MSTRG.17682	LOC100167881	uncharacterized LOC100167881	7921	8761	1737	1194	1109	6521	3556	1634	764	247	7646	4832	1284	774	1236
MSTRG.22191	#N/A	#N/A	7920	5183	6544	8273	8825	5902	5054	6295	8678	7903	6405	8254	6323	8808	6800
MSTRG.20212	LOC100168499	aquaporin AQPcic-like, active transporters; similar to aquaporin	7912	9626	6365	7869	5193	8524	7351	5798	7614	5450	7565	6057	4320	6474	6607
MSTRG.14225	LOC100161393	possible pseudogene or miscRNA, No KEGG entry	7908	7914	4889	6323	5771	7666	6638	5775	5845	4903	6903	5386	4055	4794	5999
MSTRG.5404	LOC100161704	facilitated trehalose transporter Tret1-like	7892	10477	3099	1174	1198	6525	6508	4264	977	381	7481	6008	2679	1110	1979
MSTRG.9420	LOC100162387	ectonucleoside triphosphate diphosphohydrolase 5-like	7887	7244	3931	4347	4855	6539	5271	4254	4698	2917	6487	4744	3419	3949	4546
MSTRG.15136	LOC100162814	mRNA-decapping enzyme 2-like	7869	9743	8125	11938	9467	7491	7025	8600	11074	7885	7846	6998	7713	9797	9956
MSTRG.20473	LOC100159632	uncharacterized LOC100159632	7866	2663	421	268	543	9892	1758	517	242	97	8964	3622	724	125	237
MSTRG.10533	LOC100163358	NADH dehydrogenase [ubiquinone] iron-sulfur protein 3, mitochondrial-like	7864	7803	5575	8668	8471	7140	6575	6046	9891	5811	7266	6452	4476	8085	8168
MSTRG.19204	LOC100574486	possible pseudogene or miscRNA, No KEGG entry	7864	10700	2316	985	1721	9321	4153	2345	693	1988	10643	3755	1249	1038	1081
MSTRG.18224	Ube2g1	ubiquitin-conjugating enzyme E2G 1 (EC:6.3.2.19)	7851	10885	11941	16944	12257	6769	10093	12768	17331	6280	7621	9152	11165	14172	13422
MSTRG.6535	LOC100167868	uncharacterized LOC100167868	7848	8789	6418	3686	5509	7668	6862	7577	3153	9556	7469	6324	7238	2459	6062
MSTRG.5304	LOC100162620	uncharacterized LOC100162620	7847	22978	9972	4375	4491	8677	12089	16675	2541	2496	13118	11905	9249	2685	9074
MSTRG.13203	LOC100160384	proton-coupled amino acid transporter 4-like	7844	7299	4975	3029	5913	7672	6715	5827	2446	3982	8987	7423	6857	2366	6430
MSTRG.12307	LOC100163850	malignant fibrous histiocytoma-amplified sequence 1-like	7842	8831	3529	2969	4513	7770	5920	4102	2856	8031	7301	4902	3319	2912	4510
MSTRG.4997	LOC100166853	#N/A	7819	11904	11939	11468	10530	8682	9257	13126	10303	7634	6294	6052	11065	8635	8722
MSTRG.21872	LOC100160916	histone H2B 1/2-like	7804	2381	894	771	1690	6879	2054	802	789	474	4603	2611	885	708	1762
MSTRG.9289	LOC100164637	uncharacterized LOC100164637	7796	8877	11637	17597	13579	6792	9232	12646	17802	8402	7306	8365	10023	14616	13977
MSTRG.7058	LOC100569515	uncharacterized LOC100569515	7784	2706	368	402	277	7839	1636	491	269	100	9588	4123	627	247	84
MSTRG.15271	LOC100168783	neutral alpha-glucosidase AB-like	7762	7433	7402	10892	9154	7034	6904	8048	10317	4004	6748	5640	7748	8007	7635
MSTRG.17934	LOC100160505	e3 SUMO-protein ligase RanBP2-like	7761	9456	12089	16115	10527	6915	8627	13351	14994	5257	6187	6974	9142	11485	12105
MSTRG.7574	LOC100165188	nucleolar phosphoprotein-like	7756	9738	10018	14965	11237	6804	8629	11503	15201	6525	7888	8741	8806	13255	12729
MSTRG.12776	LOC100167157	protein transport protein Sec23A-like	7755	8912	7731	10684	9562	8085	8096	7761	9876	5881	7650	6356	7476	8936	8684
MSTRG.19991	LOC100168271	uncharacterized LOC100168271	7748	7653	6079	8359	8937	7365	6132	5888	7683	10462	6974	6355	5366	7470	7070
MSTRG.2039	LOC100167925	protein piwi-like	7741	6366	3268	3487	3534	6662	4527	3343	3019	2513	5286	4126	3740	2954	2918
MSTRG.20195	LOC100158867	glucose dehydrogenase [acceptor]-like	7733	2694	440	259	636	10174	1706	540	217	88	9470	3738	812	153	280
MSTRG.16752	LOC100161095	sialin-like	7719	6916	3533	2817	2334	6802	7228	3723	2832	1848	7459	5743	3793	2578	2002
MSTRG.9183	LOC100163626	pre-mRNA-processing factor 40 homolog B-like	7704	10013	11510	17634	14918	6733	9598	11940	17686	10217	7761	10107	10786	17292	13990
MSTRG.7411	LOC100160917	NADH dehydrogenase [ubiquinone] 1 alpha subcomplex subunit 13-like	7676	7273	5599	6830	6689	6213	6190	5459	7253	5283	6934	6222	5070	7019	6475
MSTRG.22693	LOC100571403	probable citrate synthase, mitochondrial-like	7673	8283	4014	4430	5172	6236	5630	4476	4227	6406	7417	6001	3876	4291	4522
MSTRG.14308	LOC100165770	succinate dehydrogenase cytochrome b560 subunit, mitochondrial-like	7660	7025	5894	8041	7778	6539	6065	5815	9618	5854	6975	6463	5705	7608	7660
MSTRG.1464	LOC100166272	eukaryotic translation initiation factor 5B-like	7656	9437	9769	13913	11170	6594	8947	10053	13989	5429	6765	9384	9234	11799	10712
MSTRG.15371	LOC100167580	trifunctional enzyme subunit beta, mitochondrial-like	7654	8066	5028	4915	6073	6917	6362	5228	4950	8002	7179	5635	5292	4029	5437
MSTRG.3413	LOC100166545	uncharacterized LOC100166545	7642	3294	346	152	240	9464	2059	480	127	174	11300	4552	669	118	65
MSTRG.5598	LOC100161349	transmembrane protein 120 homolog	7633	8282	6306	6388	6735	6726	6935	6288	6234	5361	7364	6620	5797	5832	6113
MSTRG.5966	LOC100161170	CWF19-like protein 2-like	7628	7854	8096	10705	9508	6428	7553	8536	10032	6752	6412	7893	7944	9858	7854
MSTRG.17450	LOC100162044	possible pseudogene or miscRNA, No KEGG entry	7627	9302	9667	14385	9986	6633	8711	10186	13864	5671	6602	6818	7674	11571	10628
MSTRG.6792	LOC100159513	xaa-Pro aminopeptidase 1-like	7622	7543	7029	10422	8150	7390	6776	8064	11103	5582	7163	6422	6845	8896	8358
MSTRG.16444	Ndufa11	NADH dehydrogenase (ubiquinone) 1 alpha subcomplex, 11, 14.7kDa (EC:1.6.5.3)	7607	6673	5153	6782	6605	6190	5412	5328	7145	4717	7076	5303	4457	5762	5674
MSTRG.2087	LOC100168256	prostatic acid phosphatase-like	7607	7713	4734	6040	4543	6869	6568	5132	6014	2670	6510	5595	3413	5329	5586
MSTRG.6698	LOC100571964	uncharacterized LOC100571964	7604	10626	6975	3113	4689	6116	9288	6748	7780	2735	7177	7134	4172	6628	4959
MSTRG.20283	LOC100162906	uncharacterized aarF domain-containing protein kinase 1-like	7602	8699	6143	10523	8497	6403	7083	7194	10783	5812	6549	6502	4607	9674	8991
MSTRG.7693	LOC100160778	nucleolar transcription factor 1-A-like	7594	11979	16072	22937	16401	6470	11755	16423	23011	9044	7412	11754	12782	19853	16759
MSTRG.9245	LOC100162988	phosphatidate phosphatase LPIN3-like	7593	9117	5473	6267	6746	6346	6393	5947	5982	14772	7026	4827	3968	5504	6137
MSTRG.9362	LOC100574802	x-box-binding protein 1-like	7593	7564	5488	6608	6724	7226	5580	4879	5986	5483	7172	5022	5010	5862	5694
MSTRG.15140	#N/A	#N/A	7587	6876	5401	6739	6418	6918	5400	5574	7488	5348	6556	6078	4873	6487	6334
MSTRG.21434	LOC100161455	uncharacterized LOC100161455	7571	11657	11800	23514	15379	7983	10183	14604	23542	11937	7272	9416	7970	18433	15963
MSTRG.21787	LOC100165320	2-oxoisovalerate dehydrogenase subunit beta, mitochondrial-like	7570	8540	3308	3088	3329	6170	5665	3466	2852	2486	7042	5212	2447	3052	3086
MSTRG.17506	LOC100161605	kinesin-like protein KIF20A-like	7569	12468	18039	30487	15919	6853	11654	20840	31438	9714	7594	12429	13954	27874	19336
MSTRG.18875	LOC100167700	phosphatidylserine decarboxylase proenzyme-like	7558	7885	5573	6732	5336	6576	6303	5818	5814	4355	6427	4964	4560	5296	5410
MSTRG.10180	LOC100166958	long-chain fatty acid transport protein 4-like	7552	5321	3963	3697	3868	7711	5844	3258	4110	3425	4595	4716	2672	2584	4615
MSTRG.21974	LOC100163247	lipase 3-like	7548	10051	3286	1802	3519	8066	6555	2601	1322	7668	7806	6096	3581	1606	2591
MSTRG.17749	LOC100166672	proteasome subunit beta type-3-like	7544	9462	9739	13515	11345	6821	8627	10203	14657	7069	7364	9211	8630	13462	11809
MSTRG.2079	LOC100161348	adenylate kinase isoenzyme 1-like	7534	1138	477	307	817	3226	771	539	395	1028	3854	1722	480	311	545
MSTRG.5918	LOC100159862	aminopeptidase N-like	7530	7250	4262	3414	3609	5921	6674	4316	3314	3527	7763	4303	2983	2710	3174
MSTRG.17149	LOC100165857	protein arginine n-methyltransferase 1, putative	7529	9375	12527	17056	11207	6630	9802	13372	17953	4818	7028	9043	10304	13378	13021
MSTRG.20550	LOC100160700	phosphoenolpyruvate carboxykinase [GTP]-like	7527	7931	4265	1908	7332	6148	5757	3963	1700	24718	7388	4353	3982	1591	5903
MSTRG.18243	LOC100161019	proteasome subunit alpha type-3-like	7524	9806	11646	17066	12762	6618	9850	10827	18305	6236	7085	10031	9363	15744	13436
MSTRG.20714	LOC100166916	maltase 1-like	7523	1275	1365	1416	522	7671	3359	1481	1848	234	5735	3723	2816	1208	1204
MSTRG.17865	LOC100158872	CCAAT/enhancer-binding protein gamma-like	7515	7211	4196	5734	5267	6793	5871	4981	5989	3320	7322	5759	3318	5349	4754
MSTRG.9568	LOC100165656	tolloid-like protein 2-like	7505	5828	2781	1057	1576	7662	8539	2447	855	2199	6398	6094	2876	779	1847
MSTRG.13938	LOC100162928	chromatin-remodeling complex ATPase chain Iswi-like	7473	12913	15934	19849	13126	7036	12141	16622	17475	9303	7231	10457	15191	15717	13832
MSTRG.16155	LOC100162555	procollagen-lysine,2-oxoglutarate 5-dioxygenase	7469	10846	6108	7883	6664	7292	7524	7468	7533	4487	7410	5466	4075	6094	7187
MSTRG.11958	LOC100168147	UPF0446 protein C12orf31 homolog-like	7459	8438	6475	10160	10268	6218	7001	7558	10301	7937	6866	8166	6687	10287	9099
MSTRG.10904	LOC100165458	translocon-associated protein subunit gamma-like	7458	8402	7898	13874	12752	6913	7799	8797	14970	5083	7274	8124	6637	11964	13444
MSTRG.17921	LOC100162752	acetyl-CoA acetyltransferase B, mitochondrial-like	7454	7459	4818	6248	5886	6721	7281	4982	6481	6830	6101	5560	3921	6809	4918
MSTRG.20581	LOC100165805	protein FAM50 homolog	7439	8662	7298	16258	12912	6633	8048	11214	15760	6848	6544	6973	7910	12864	14592
MSTRG.20241	LOC100165409	poly [ADP-ribose] polymerase-like	7436	9307	9952	14203	9055	6157	8486	10620	13686	5112	6664	8832	8968	12510	10124
MSTRG.10116	LOC100165907	26S protease regulatory subunit 6B-like	7418	8998	10072	14806	10424	6973	8405	11108	15429	4902	7268	7934	9079	12536	12183
MSTRG.16407	LOC100162610	RNA-binding protein lark-like	7410	11206	12405	10441	10869	6479	9877	12010	8753	5877	7326	8896	12570	7387	10516
MSTRG.7808	LOC100164551	eukaryotic peptide chain release factor subunit 1-like	7405	8107	9221	12666	9641	7524	7702	8451	12809	5467	7347	7324	8295	10095	10116
MSTRG.17296	LOC100575109	ribonuclease kappa-like	7404	6215	4505	6218	6455	6711	5550	4456	6566	4172	7499	6441	4481	5965	6265
MSTRG.18059	LOC100160318	coatomer subunit gamma-like	7393	8275	8812	13073	11380	6939	8143	9185	13462	6678	6691	7302	7718	10705	10529
MSTRG.7320	LOC100160659	6-phosphofructokinase-like	7392	6261	3658	3167	3419	6597	4910	3947	2966	3242	6359	3900	3100	2504	3021
MSTRG.10741	LOC100163498	uncharacterized LOC100163498	7392	9746	9687	16343	12545	6685	8400	10820	14625	9933	7119	9510	9648	14209	12492
MSTRG.5124	Ak2	adenylate kinase 2, mitochondrial (EC:2.7.4.3)	7360	7627	4852	3798	4576	5909	6165	4687	3845	3957	6806	6168	4617	3193	4475
MSTRG.5700	LOC100164697	coatomer subunit beta-like	7358	7868	7546	10839	9238	6493	7396	8004	10103	4928	6622	6230	8297	8405	8480
MSTRG.11030	LOC100161043	trehalase-like	7349	5030	1733	1554	1553	5956	4347	2060	1071	1593	7229	3584	2213	1177	1783
MSTRG.10245	LOC100165176	SUMO-activating enzyme subunit 2-like	7348	0	7772	9610	7137	5884	7074	8444	9565	0	6164	6510	8685	8083	7842
MSTRG.19922	LOC100160020	protein phosphatase 1G-like	7317	9436	13905	13468	10334	6496	10502	13919	13498	6471	6080	8812	14406	11480	11162
MSTRG.7926	Sxl	sex-lethal	7312	10000	9177	11120	11884	6993	8267	9603	11067	10180	7502	7772	10019	10989	11455
MSTRG.6287	LOC100163322	acyl-protein thioesterase 1-like	7303	8048	6840	8302	6951	6563	6449	7646	9769	3917	7045	6594	5754	8433	7200
MSTRG.19532	LOC100159253	uncharacterized LOC100159253	7290	10587	11119	11997	10696	7027	9879	11183	10664	6290	8168	10483	11012	10167	9932
MSTRG.11991	LOC100159140	pumilio homolog 2-like	7280	9751	8512	11327	10652	6316	7812	9859	11414	8867	6590	8293	6908	11541	10724
MSTRG.11559	LOC100159805	uncharacterized LOC100159805	7263	9596	3229	2706	5190	8812	4325	4726	2332	4668	8293	4212	4222	2411	5339
MSTRG.5231	LOC100572833	multiple epidermal growth factor-like domains protein 6-like	7252	12622	6791	6640	4645	6664	9040	8393	6578	5366	7275	6737	5381	6299	5729
MSTRG.10611	LOC100575145	uncharacterized LOC100575145	7244	886	1207	1052	1055	7346	2221	1777	3727	3122	8598	5763	2482	1657	1320
MSTRG.16369	LOC100168621	guanine nucleotide-binding protein-like 3 homolog	7243	8567	7968	11753	8762	6945	7501	8377	10989	7302	7192	7125	6930	9206	9115
MSTRG.235	LOC100161810	uncharacterized LOC100161810	7242	8406	10006	12314	11444	6452	7601	9866	12601	8010	6625	8093	9989	10924	11186
MSTRG.12280	LOC103309572	#N/A	7242	8549	7641	9654	10519	6267	7598	7709	9236	4245	6971	6576	7235	7401	8560
MSTRG.5151	LOC100165432	nuclear migration protein nudC-like	7238	9751	9813	15059	11382	6069	9056	10862	15656	5813	7144	8937	9522	13546	11731
MSTRG.7901	LOC100159357	alcohol dehydrogenase [NADP+]-like	7231	5443	3555	4331	7040	5941	4517	3493	4327	4075	7177	4723	4641	3043	5362
MSTRG.20563	LOC100167151	uncharacterized LOC100167151	7221	8504	9658	8108	7764	6659	8593	9759	7672	6169	6822	6624	10071	6440	8233
MSTRG.9901	LOC100161162	carbonic anhydrase 13-like	7219	5725	1966	1297	2321	6651	3749	2496	1166	2935	6246	3679	2672	1066	2884
MSTRG.10034	LOC100166665	putative U5 small nuclear ribonucleoprotein 200 kDa helicase-like	7217	10031	11868	13678	9492	6518	9580	12287	12174	5878	6244	7912	11055	10523	10794
MSTRG.5329	LOC100162999	KH domain-containing, RNA-binding, signal transduction-associated protein 3-like	7217	9385	9410	12864	9729	6274	8965	10077	11751	5587	6450	6902	10168	10389	10507
MSTRG.19820	LOC100159034	baculoviral IAP repeat-containing protein 2-like	7214	11220	8710	11871	7597	6698	9689	9414	7123	16180	7505	5654	9855	10839	12560
MSTRG.5356	LOC100164201	mitochondrial import inner membrane translocase subunit TIM50-C-like	7207	7421	6004	7203	7086	6462	6141	6113	6954	5149	6553	6105	5466	6387	5666
MSTRG.21543	Obp1	odorant-binding protein 1	7203	10284	7921	12225	18870	6132	8390	9106	13766	19420	6934	7435	5828	15787	16439
MSTRG.13981	LOC100165833	possible pseudogene or miscRNA, No KEGG entry	7191	6605	4319	5565	6209	7660	4164	4295	4733	4680	5827	4243	3608	3951	5105
MSTRG.17175	Rrs1	RRS1 ribosome biogenesis regulator homolog	7140	6772	6841	9419	7974	5777	6773	7605	9566	4881	6244	7461	6852	8778	7540
MSTRG.15609	LOC100166578	uncharacterized LOC100166578	7139	7870	6732	9298	8624	6037	6659	6739	8655	7043	6149	6787	5542	8632	7206
MSTRG.6676	LOC100572249	dolichyl-diphosphooligosaccharide--protein glycosyltransferase 48 kDa subunit-like	7129	6763	6193	11892	10370	5947	5755	6285	13090	3401	6051	5650	5835	10282	10246
MSTRG.13937	LOC100160910	eukaryotic translation initiation factor 6-like	7124	8312	9019	12990	9544	6083	8277	9600	13576	4093	6940	8437	7962	10921	9656
MSTRG.7214	LOC100161811	facilitated trehalose transporter Tret1-like, Sugar transporters; similar to AGAP007667-PA	7119	7910	3511	1732	2790	6013	6266	4718	1372	5310	8182	4617	3697	1479	3651
MSTRG.9924	Ndufs4	NADH dehydrogenase (ubiquinone) Fe-S protein 4, 18kDa (NADH-coenzyme Q reductase)	7111	6596	5029	6959	6678	5753	5099	5088	7658	4774	6796	5756	4398	6644	6697
MSTRG.13905	LOC100164636	vesicle-associated membrane protein-like	7102	7502	6139	10951	8600	6196	7389	7646	10525	5581	7267	7320	6396	8881	8751
MSTRG.11715	LOC100159063	uncharacterized protein LOC100159063	7095	3589	465	231	293	7606	2471	631	170	160	11936	5731	896	226	29
MSTRG.10757	LOC100161351	possible pseudogene or miscRNA, No KEGG entry	7094	9290	9125	13262	10595	6323	7688	10143	13132	8530	6601	7206	7868	11844	10598
MSTRG.7637	LOC100160412	prickle-like protein 3-like	7094	5074	1123	843	2575	3728	3129	1443	719	1364	4599	3167	928	658	1956
MSTRG.6874	LOC100162495	uncharacterized LOC100162495	7087	8339	9221	14097	11204	6317	8010	9930	13628	7049	6044	7967	9721	13652	10822
MSTRG.21770	LOC100166007	elongation of very long chain fatty acids protein AAEL008004-like	7079	6328	6007	4943	5230	6892	7612	6555	4768	6483	9962	7403	5804	4561	5364
MSTRG.7491	Ance-like	angiotensin converting enzyme-like	7072	8708	3231	1819	1899	6869	5202	2823	1800	736	6391	4438	2717	1353	1976
MSTRG.17919	LOC100162126	uncharacterized LOC100162126	7070	10523	12198	20646	15992	6570	8862	12660	21107	11749	7224	10129	10422	19013	16789
MSTRG.6198	LOC100160933	deoxyuridine 5'-triphosphate nucleotidohydrolase, mitochondrial-like	7067	11438	10865	7571	5721	6393	9988	10755	6307	4205	6858	9734	10921	6389	7062
MSTRG.13709	Ptp4a1	protein tyrosine phosphatase type IVA, member 1 (EC:3.1.3.48)	7061	8803	7291	10108	10273	6652	7293	7824	9230	9385	7559	6108	7396	8219	8886
MSTRG.6809	LOC100165217	GMP synthase [glutamine-hydrolyzing]-like	7058	7088	7001	8587	4722	5746	7164	7682	8471	4188	5346	5126	5716	7252	6532
MSTRG.13035	LOC100162280	uncharacterized LOC100162280	7053	7295	2599	2138	3623	5743	4622	3459	2021	6760	6772	4301	2310	2282	2335
MSTRG.10384	LOC100165233	breast cancer metastasis-suppressor 1-like protein-like	7038	7816	9147	17717	11006	6405	7290	10084	18304	6191	5634	8200	6456	16030	12433
MSTRG.19657	#N/A	#N/A	7028	3998	1195	578	515	5411	2334	1016	608	617	5407	2782	1507	453	521
MSTRG.5363	LOC100163428	facilitated trehalose transporter Tret1-like, Sugar transporter	7019	7366	3747	2339	1409	7521	5148	3445	2309	818	5924	6557	4350	2650	2179
MSTRG.9417	LOC100164476	longevity assurance factor 1 (lag1)-like	7015	7868	4649	4364	4749	7116	6398	5392	4040	2734	6258	5948	4415	2398	4926
MSTRG.20919	LOC100158884	phosphoserine phosphatase; PSPH	7011	6194	4604	3738	3806	6490	5396	4060	3645	1869	6731	5657	3252	3066	3157
MSTRG.14533	LOC100159220	polyadenylate-binding protein 2-like	6999	7476	8589	9405	7709	4925	7039	7158	9145	4345	5743	6250	7901	7237	7426
MSTRG.19343	LOC100163212	uncharacterized LOC100163212	6992	7407	7540	10828	9823	6405	6430	7248	10623	8852	6402	7242	7626	10717	9127
MSTRG.21824	LOC100168986	signal recognition particle receptor subunit alpha homolog	6992	6512	5554	8616	8606	6277	5775	5557	9312	5137	6110	5660	4607	7957	7962
MSTRG.2357	LOC100574212	1,4-alpha-glucan-branching enzyme-like	6982	9589	3490	2022	1577	5165	6022	3988	1725	1409	5650	3732	1991	1963	2273
MSTRG.16581	LOC100159197	cystathionine gamma-lyase; CTH	6980	7732	5520	4293	4536	5960	7276	4742	4492	3447	7936	6378	3284	3108	3237
MSTRG.15593	LOC100160211	mitochondrial import receptor subunit TOM40 homolog 2-like	6971	7098	5875	6074	5248	6086	6209	6084	6129	3692	6275	5667	5708	5172	5433
MSTRG.2088	LOC100168092	fatty acyl-CoA reductase 1-like	6966	4547	4167	3648	2121	7955	5701	3204	4016	1467	5270	4563	3771	3251	1989
MSTRG.16015	LOC100167202	transcriptional activator protein Pur-alpha-like	6966	7553	3444	4248	3980	6146	5506	3836	4143	3149	6355	4396	2691	3546	4445
MSTRG.12823	LOC100160865	26S proteasome non-ATPase regulatory subunit 4-like	6953	8647	9445	13014	9479	5905	8038	9931	12789	4818	6450	7169	8906	10847	8613
MSTRG.2681	LOC100167008	uncharacterized LOC100167008	6945	6120	2865	2056	2799	6571	4778	3115	2086	5263	7423	5156	3974	2031	2580
MSTRG.17271	LOC100159525	u3 small nucleolar RNA-associated protein 14 homolog A-like	6942	7590	6591	11758	8539	5929	6760	7685	12549	5165	6421	8141	5890	10739	8987
MSTRG.15997	Ndufb3	NADH dehydrogenase (ubiquinone) 1 beta subcomplex, 3, 12kDa	6935	7404	5658	8067	7091	6317	6254	5795	8861	4516	6954	6255	4738	7724	7279
MSTRG.15607	LOC100161640	uncharacterized LOC100161640	6933	8488	10363	16495	10675	5768	8506	11411	16890	6875	6946	8839	9319	15300	11804
MSTRG.19878	LOC100161644	UDP-glucose 4-epimerase-like	6930	6222	3852	5590	5580	6107	4546	4335	5962	7237	6823	5158	3369	5443	5607
MSTRG.21367	LOC100163275	possible pseudogene or miscRNA, No KEGG entry	6915	8977	8061	11371	9787	6968	7015	8512	9577	8922	5859	5384	6947	8780	9613
MSTRG.20945	LOC100167521	probable ribosome production factor 1-like	6907	7975	6855	10616	8835	6090	6562	7158	10749	6959	6821	8387	6488	9384	8747
MSTRG.16696	LOC100161074	glutamate-rich WD repeat-containing protein 1-like	6904	8106	8471	11775	7999	5280	7743	8961	11799	4173	6177	7590	7931	9906	8330
MSTRG.20108	LOC100159667	<ApGLNT1> similar to proton-coupled amino acid transporter 1	6903	6768	4211	2763	3280	7009	5749	4499	2598	4186	7645	5518	4634	1925	4049
MSTRG.5135	LOC100166729	UDP-glucuronosyltransferase 2B2-like	6901	1507	2518	2022	1183	15979	2603	1625	3482	2809	10278	4854	3443	2143	1731
MSTRG.17038	LOC100166221	alpha-aminoadipic semialdehyde synthase, mitochondrial-like	6895	10723	2544	790	938	6463	5932	3524	714	2621	7057	4922	2135	898	1414
MSTRG.5465	LOC100161297	serine/threonine-protein kinase TAO1-like	6891	8433	8477	14297	12906	6184	6778	9237	14956	9788	6596	6865	7860	14097	11668
MSTRG.16994	LOC100165584	MAP kinase-interacting serine/threonine-protein kinase 1-like	6885	8846	4123	3288	4292	6009	6495	4921	2757	14305	6765	4981	3940	2940	4878
MSTRG.13001	LOC100165407	nuclear pore complex protein Nup50-like	6885	8062	8256	13254	9264	6252	7433	9479	13003	5207	6329	6580	6866	10223	10668
MSTRG.11114	LOC100164327	uncharacterized LOC100164327	6880	8459	7741	8251	6704	6680	7127	7895	7035	5596	5701	5052	7797	5937	7233
MSTRG.10685	LOC100169188	NADH dehydrogenase [ubiquinone] 1 subunit C2-like	6876	6725	4876	6884	7463	5792	5226	4860	7471	4295	6444	5811	4879	6735	5737
MSTRG.21235	LOC100160918	27 kDa hemolymph protein-like	6865	7810	4512	4507	5204	6188	6062	4577	4604	11861	6208	4763	4193	3576	5252
MSTRG.15326	ACYPI27183	#N/A	6854	6854	3729	3998	3701	5382	6303	3685	4454	2321	5804	5076	2487	3813	6245
MSTRG.19198	LOC100164651	DNA replication licensing factor MCM3-like	6851	7568	8312	9836	5776	6230	7235	8836	8913	2821	4857	5677	7063	7209	6840
MSTRG.7382	LOC100163927	ribosome biogenesis protein BOP1 homolog	6849	7556	8163	9224	7021	6059	7730	8132	9250	3620	5928	7418	8560	7261	6489
MSTRG.14514	LOC100166313	uncharacterized LOC100166313	6843	7718	6846	9199	7698	6223	7436	7197	9134	5394	6586	5691	5643	7544	7963
MSTRG.9123	LOC100161301	uncharacterized LOC100161301	6841	7399	7160	10544	7687	5787	6758	7906	11074	4765	6347	7759	6219	9803	8263
MSTRG.16133	LOC103309629	#N/A	6834	13778	17284	29440	24535	8187	12342	18014	29677	17115	8627	13179	14967	28987	22697
MSTRG.19155	LOC100162533	ribosome production factor 2 homolog	6831	8373	8221	12049	9448	5798	7477	8644	11888	5445	6810	8677	7297	10865	9757
MSTRG.8028	Prosbeta5	20S proteasome beta5 subunit	6831	8170	9165	13074	9978	6538	8546	9748	14577	5379	6700	7778	8545	11100	10613
MSTRG.16098	LOC100160039	transforming protein Rho-like	6830	7879	8000	12400	10095	6370	7375	8203	12575	5751	6545	6526	7184	10393	9807
MSTRG.18528	LOC100167982	ruvB-like 2-like	6824	8669	10035	12108	8102	5494	8805	10041	10790	4643	5910	7486	9715	9223	7652
MSTRG.9918	LOC100169062	uncharacterized LOC100169062	6817	6749	7420	11171	12799	6355	5888	7029	10780	8180	7023	5935	7638	9471	10100
MSTRG.19313	LOC100163487	pre-mRNA-processing factor 39-like	6813	7374	7271	13596	11389	5716	6291	7992	13509	9312	5991	6824	6078	12829	11461
MSTRG.17070	LOC100161691	adenine nucleotide translocator-like	6799	2393	495	275	6113	5673	1530	524	855	13939	7276	1779	330	437	2352
MSTRG.13939	LOC100160528	nucleolar complex protein 2 homolog	6799	8387	8939	13205	9076	5946	8354	10054	13618	4759	5981	7810	7377	11729	9921
MSTRG.578	LOC100167470	estradiol 17-beta-dehydrogenase 12-like	6786	7383	3038	2756	2642	6869	5093	3592	3340	2704	6163	4910	2555	3227	3259
MSTRG.21710	LOC100168875	mitochondrial import receptor subunit TOM22 homolog	6784	7877	7809	12224	10388	6001	7127	8479	13013	5660	7075	7928	7774	11061	10352
MSTRG.5761	LOC100162466	dynein heavy chain, cytoplasmic-like	6783	8938	8966	12442	8452	6257	7691	10099	10314	5696	5023	5094	7939	8090	8693
MSTRG.2502	LOC100160371	protein transport protein Sec61 subunit beta-like	6778	8667	7747	8833	9909	6206	7444	7810	9129	4554	7343	8270	7394	7956	8348
MSTRG.12754	LOC100169254	CCR4-NOT transcription complex subunit 1-like	6778	8625	9110	12426	9654	6158	7796	10525	11086	7211	5868	6208	8573	10126	10596
MSTRG.15076	LOC100168309	mRNA turnover protein 4 homolog	6773	8304	8052	10795	8635	5440	8080	8704	11002	4925	6884	8357	7295	9974	8848
MSTRG.16567	LOC100165993	serine/arginine rich splicing factor-like	6770	9646	10031	7684	9118	6073	8812	9917	6234	8690	6928	8879	11536	5365	7801
MSTRG.5965	LOC100163214	26S proteasome non-ATPase regulatory subunit 8-like	6769	8292	7898	11673	8569	5922	7524	8651	12033	6291	6415	7494	7032	10007	10036
MSTRG.6350	Gmpr2	guanosine monophosphate reductase 2 (EC:1.7.1.7)	6758	6193	3915	3995	4684	5386	5992	4152	4008	4140	6195	4050	2530	3070	3856
MSTRG.12125	LOC100160300	#N/A	6757	5889	1708	2017	3571	6410	3029	1930	1884	2681	6346	3323	2382	1749	3275
MSTRG.19484	LOC100165255	Aspartate transaminase	6756	5425	3477	5003	3538	5034	5227	4103	5351	2196	6205	5169	3865	4133	3901
MSTRG.5962	LOC100160676	eukaryotic translation initiation factor 4E-like	6748	9126	9491	15162	11527	5557	8206	10890	16051	5922	7092	9708	8465	14434	12713
MSTRG.24732	LOC100574604	possible pseudogene or miscRNA, No KEGG entry	6746	5869	2641	1527	947	5735	5015	3406	1032	3387	6949	4475	2537	933	1270
MSTRG.9311	LOC100168123	S-phase kinase-associated protein-like	6730	9345	11300	15194	13110	6361	9330	13124	15138	7802	6444	8813	11650	12409	12962
MSTRG.4574	#N/A	#N/A	6730	398	510	265	238	4764	1436	851	724	338	5587	3473	1395	311	393
MSTRG.10290	LOC100161104	bifunctional enzyme CarRP-like	6718	2238	290	97	323	5736	1657	396	24	114	7035	1453	272	57	191
MSTRG.21514	LOC100161983	apolipoprotein D-like	6702	7874	4039	7724	7466	5481	4819	4834	7884	7607	6287	4299	4041	7122	7352
MSTRG.14708	LOC100164292	60S ribosomal export protein NMD3-like	6687	6923	6335	7673	7345	5615	6112	6648	7755	4893	5771	5692	5824	6793	6617
MSTRG.11006	LOC100163888	#N/A	6684	6937	6480	9128	7932	5839	6365	6890	8998	3572	6014	6621	6202	6903	7398
MSTRG.18720	LOC100161573	uncharacterized LOC100161573	6678	9641	8267	7514	8609	6396	8265	8851	6184	8220	6668	6652	7258	6133	7749
MSTRG.10403	LOC100160368	spectrin beta chain-like	6665	6883	5653	4987	6388	6849	5532	6082	3492	5055	6008	4002	6013	2984	7246
MSTRG.565	LOC100164466	uncharacterized LOC100164466	6664	8224	4303	20	7813	7453	6504	6462	6818	7837	13	6994	6310	3830	7284
MSTRG.8883	LOC100166250	serine/threonine-protein phosphatase 4 catalytic subunit-like	6654	7930	9775	11174	9682	5719	6611	10020	10784	6247	5452	6986	10016	9495	9020
MSTRG.8410	LOC100570069	uncharacterized LOC100570069	6642	7858	8925	16554	15498	6194	6648	9379	16416	13433	5782	7918	7063	17167	13491
MSTRG.20269	LOC100158768	fragile X mental retardation syndrome-related protein 1-like	6637	8461	8571	9936	7433	5816	7682	9838	9640	5071	5685	5546	8380	7786	8573
MSTRG.7072	LOC100162176	elongation of very long chain fatty acids protein 1-like	6635	5272	3757	4714	3225	7294	5652	3127	5526	2433	4986	4731	3120	4865	4186
MSTRG.21969	LOC100166212	tricarboxylate transport protein, mitochondrial-like	6631	6085	3198	3697	2510	5456	4939	3229	3512	1490	5433	3691	2692	2717	2751
MSTRG.2239	LOC100158664	cytochrome c1-like	6627	6783	5728	6373	6487	6156	5473	5962	6361	5573	6213	5632	5294	5662	5718
MSTRG.14083	LOC100166839	26S proteasome non-ATPase regulatory subunit 7-like	6625	7745	8452	11307	9160	6159	6903	8622	12246	4087	6585	7050	6829	9714	9666
MSTRG.20761	LOC103310588	#N/A	6624	7223	6404	6782	5656	5892	6753	6689	6309	3693	5837	6165	6681	4899	5205
MSTRG.20599	LOC100162419	probable ATP-dependent RNA helicase DDX5-like	6620	7024	8185	7940	7581	6002	7073	8682	6476	5888	5609	5949	9343	5369	7312
MSTRG.8577	LOC100164419	la-related protein 1-like	6619	8445	6761	6428	5183	6131	6828	7034	5364	3271	5461	4504	4931	4229	5748
MSTRG.2252	LOC100163680	dihydropyrimidine dehydrogenase [NADP+]-like	6615	7336	3390	1963	3066	6187	5848	3675	2245	4427	7220	4483	2804	1928	2611
MSTRG.7570	LOC100161080	uncharacterized LOC100161080	6610	11797	15448	20818	12834	5933	11422	17563	18406	10275	6236	7497	16208	15182	16158
MSTRG.20629	LOC100144797	protein tyrosine phosphatase-like	6593	5633	4380	5358	5501	6552	5550	4021	6000	4169	5707	5484	3633	5370	5309
MSTRG.9255	LOC100167689	ubiquitin carboxyl-terminal hydrolase 16-like	6588	6155	6179	9431	8074	5665	5190	6823	8595	5682	5007	4943	5462	7418	7505
MSTRG.6109	LOC100166079	proteasome subunit alpha type-4-like	6587	7869	8526	12963	10111	6033	7419	8909	14201	6563	5997	7591	8014	12469	10567
MSTRG.7546	LOC100168788	succinyl-CoA ligase [ADP-forming] subunit beta, mitochondrial-like	6582	6429	4728	5720	5965	6000	5565	4736	6722	5188	6481	4803	4088	4933	5239
MSTRG.6183	LOC100169304	bromodomain adjacent to zinc finger domain protein 1A-like	6578	9756	13443	20938	14048	6234	9675	13881	21194	11008	6103	9657	10623	19518	15492
MSTRG.6423	LOC100161041	glucosidase 2 subunit beta-like	6575	6318	6633	11062	9524	5887	6013	6767	12237	5440	6248	6574	6024	10390	9618
MSTRG.21529	Obp7	odorant-binding protein 7	6562	6709	4039	4649	4799	5408	5242	3852	4383	3415	6499	5485	2711	4039	4614
MSTRG.21016	LOC100163115	ubiquitin-conjugating enzyme-like	6554	7203	6960	8580	6873	5767	6851	7602	7898	4412	6064	5049	6648	6195	7240
MSTRG.15257	LOC100160827	gamma-glutamylcyclotransferase-like	6550	6662	4565	7095	5300	5037	5419	5523	7418	2874	6605	5431	4311	6464	5533
MSTRG.16864	LOC100165814	heterogeneous nuclear ribonucleoprotein Q-like	6550	6319	5752	6023	5903	6295	5524	5920	5580	3955	5304	4999	5580	5028	6625
MSTRG.2024	LOC100162064	papilin-like	6549	6957	4216	2101	4322	8862	5852	3720	1987	1765	4108	3380	4413	1055	3008
MSTRG.21992	ACYPI38240	#N/A	6547	5954	6042	10176	10125	6264	6008	7474	12087	7869	5637	6397	6878	9784	9348
MSTRG.21449	LOC100169645	heat shock protein 75 kDa, mitochondrial-like	6543	6798	5218	7865	6358	5866	6148	6104	8617	3306	5655	5826	4819	6727	6758
MSTRG.11618	LOC100159774	H/ACA ribonucleoprotein complex subunit 2-like	6542	7909	8019	11624	8976	5024	7330	8377	12076	4314	6737	8132	6832	11030	9114
MSTRG.17930	LOC100166044	ras-related protein Rab-11A-like	6538	7611	6798	9661	8525	5986	6232	7150	9608	5159	6523	5196	5935	7539	8299
MSTRG.5639	Cox10	COX10 homolog, cytochrome c oxidase assembly protein, heme A: farnesyltransferase	6534	6197	4277	5652	5322	5908	4667	4359	6350	4550	5998	4663	3765	5300	5544
MSTRG.17249	LOC100160141	u2 snRNP-associated SURP motif-containing protein-like	6529	8096	9276	12414	11454	6323	5545	10448	13298	8854	4879	7465	6818	11574	9587
MSTRG.12559	LOC100164183	leucyl-tRNA synthetase, cytoplasmic-like	6528	7350	6728	7680	6027	5790	6991	7941	6851	3252	5636	5743	6805	5699	5961
MSTRG.8089	LOC100158928	putative odorant-binding protein A10-like	6528	7020	4372	3035	4634	5519	6339	4232	2510	3387	5628	5422	3551	2154	4905
MSTRG.5310	LOC100574081	uncharacterized LOC100574081	6524	4778	3387	4522	4781	6153	4507	4030	5340	4397	5944	4242	3316	4163	4841
MSTRG.6689	LOC100572218	tubulin alpha chain-like	6510	3541	1360	1918	2077	5123	2362	1270	1634	904	4033	2526	1360	1676	1647
MSTRG.20458	LOC103310742	#N/A	6506	7953	7467	8786	8145	5261	7377	7952	8231	4849	6521	6702	7236	7301	8148
MSTRG.22058	LOC100169630	26S protease regulatory subunit 10B-like	6502	7285	8154	10659	7730	5260	7225	8186	10831	4402	4980	5848	7146	8301	8367
MSTRG.23164	LOC100569565	cathepsin B-like cysteine proteinase-like	6499	292	271	106	107	4160	1319	443	499	58	4919	3154	980	189	118
MSTRG.13820	LOC100165788	cystinosin homolog	6484	4391	3997	3979	3406	6859	5444	3774	4042	2694	5678	5344	3345	3543	3865
MSTRG.16799	LOC100169439	probable cation-transporting ATPase 13A3-like	6475	7936	6970	8212	6395	6297	6763	7155	7109	4743	5290	4803	6727	5836	7463
MSTRG.20967	LOC100163740	protein Kr-h2-like	6473	5619	3953	4361	4649	6226	4484	4064	4118	3521	5714	4183	3843	3089	4360
MSTRG.9452	LOC100167995	uncharacterized LOC100167995	6469	1648	1749	15943	22578	9101	1425	2333	9520	11516	5860	2658	2400	8828	13410
MSTRG.12229	LOC100159797	putative fatty acyl-CoA reductase CG5065-like	6465	4399	3355	2918	1806	6568	5031	2646	2926	2596	6443	4790	2474	2580	1799
MSTRG.22053	LOC100163029	heterogeneous nuclear ribonucleoprotein H-like	6459	11256	11397	10044	9042	6075	10943	12042	7729	6912	6976	8474	12186	6603	9234
MSTRG.12788	LOC100163506	uncharacterized LOC100163506	6458	1494	309	338	391	7197	1555	376	186	99	5009	3390	448	181	184
MSTRG.18004	LOC100166715	ribosome biogenesis protein BRX1 homolog	6450	7703	7722	10364	7643	5607	7583	7892	11393	4071	6461	7827	7452	9391	9084
MSTRG.398	LOC100161706	threonyl-tRNA synthetase, cytoplasmic-like	6446	8232	9887	14214	9382	6262	8614	11366	12464	3823	6678	6436	8804	11357	10508
MSTRG.10108	LOC100161345	leucine-rich PPR motif-containing protein, mitochondrial-like	6441	7336	6815	10265	7266	5850	6671	7566	10149	3454	5632	5694	4817	7918	7905
MSTRG.6216	LOC100160904	uncharacterized LOC100160904	6431	5210	5138	5691	6184	5316	5781	4995	4541	6375	5529	3410	3935	4778	4728
MSTRG.14517	LOC100159165	UBX domain-containing protein 1-like	6409	7957	9154	15204	10779	5631	7414	9792	15293	6120	6639	8678	7753	13317	11422
MSTRG.18425	LOC100165359	hsp90 co-chaperone Cdc37-like	6403	8864	10015	14113	11935	5719	8101	9874	13675	7131	6712	8058	8510	11260	10642
MSTRG.11253	LOC100163316	protein KRI1 homolog	6389	7419	7276	13184	8319	4852	6665	7496	14177	5990	5503	7755	5912	12794	10085
MSTRG.15338	LOC100167741	uncharacterized LOC100167741	6385	6943	7118	11916	10857	6124	7399	7793	15139	4978	6689	8285	5914	11132	9336
MSTRG.5313	LOC100160637	ADIPOR-like receptor CG5315-like	6381	6275	4731	5230	5659	5392	5253	4737	5153	4033	5881	5029	4116	4519	4761
MSTRG.5963	LOC100162709	uncharacterized LOC100162709	6378	9745	12637	22902	17395	6245	8694	13663	21884	14006	5911	8434	11121	19789	16491
MSTRG.10271	LOC100569447	elongation of very long chain fatty acids protein 4-like	6373	6182	2711	2793	1610	6567	4412	1277	3394	896	3881	3994	1827	3030	2618
MSTRG.21800	LOC100162824	thioredoxin-dependent peroxide reductase, mitochondrial-like	6373	5842	4106	6556	6492	5212	4770	4485	7282	4131	5357	5030	3688	6268	6427
MSTRG.16271	LOC100164786	#N/A	6372	6298	3811	6119	5726	5344	4485	4062	6669	4127	4710	4923	3056	5843	5582
MSTRG.2804	LOC100162643	protein hu-li tai shao-like	6366	5507	5009	7555	7575	5840	5000	5675	6875	5780	5579	4574	5135	6157	6925
MSTRG.16101	LOC100160818	uncharacterized LOC100160818	6364	7419	7456	11987	9388	5432	6901	8020	12502	6556	5598	7702	6579	11340	9283
MSTRG.3459	LOC100168960	uncharacterized LOC100168960	6363	6934	7737	11039	8883	5605	6423	7728	10798	5194	5855	6515	6796	9664	8195
MSTRG.17041	LOC100163630	serine/threonine-protein phosphatase 4 regulatory subunit 1-like	6347	8800	11573	16206	13234	5859	8037	11979	14731	10911	5981	6376	10905	14158	13140
MSTRG.10413	LOC100168687	gamma-glutamyltranspeptidase 1-like	6342	3342	1601	956	428	4644	3402	1689	1380	193	5478	3474	1665	770	632
MSTRG.18251	LOC100163045	mitochondrial glutamate carrier 1-like, active transporters; similar to GA14898-PA	6339	7064	4334	5028	3497	5317	5460	4489	4825	2417	5283	4547	3301	4402	4175
MSTRG.18647	LOC100166356	exportin-4-like	6329	8299	10175	16423	11193	5800	8415	12087	15855	6768	5213	6989	8755	13828	12171
MSTRG.17315	LOC100159217	signal recognition particle 54 kDa protein-like	6328	6749	5760	7089	6133	5576	6548	6240	6351	3811	5708	5309	5601	5229	5122
MSTRG.19476	LOC100161890	cell-death-related nuclease 7-like	6319	5178	4843	6145	4981	6080	5374	4559	6045	3624	5353	5269	4825	5899	5413
MSTRG.16629	LOC100160988	t-complex protein 1 subunit theta-like	6317	8078	8192	7924	7393	5249	7943	8630	6823	4845	5831	6718	9941	6056	7676
MSTRG.134	LOC100166127	uncharacterized LOC100166127	6316	4488	1138	629	239	4917	2728	1071	523	138	4863	3135	1601	403	552
MSTRG.6390	LOC100167422	NADH dehydrogenase [ubiquinone] 1 alpha subcomplex subunit 5-like	6315	5166	4179	5578	5934	5180	4796	4412	5847	4232	5385	5377	3556	5041	5109
MSTRG.12036	LOC100168345	zinc finger protein Xfin-like	6307	1756	7994	9036	7649	1077	1746	8335	8125	7553	5352	5976	7734	7818	1350
MSTRG.8627	LOC100159459	n-acetyltransferase 10-like	6307	7299	8435	10044	7667	5208	7386	8690	9952	3963	4965	6261	7571	7765	7411
MSTRG.19614	LOC100144907	ADP ribosylation factor 2	6304	7005	6727	9913	8355	5319	6158	6920	10094	4339	6156	5876	5853	8807	8642
MSTRG.21450	LOC100162777	alpha-crystallin B chain-like	6302	3705	2075	6004	8472	5842	2427	2398	5348	4233	8176	2835	2328	4449	6896
MSTRG.17202	Pomp	proteasome maturation protein	6284	7627	7508	11251	8641	6253	7680	8273	11973	4869	6654	7347	6977	10502	8766
MSTRG.8485	LOC100161229	mitochondrial import inner membrane translocase subunit Tim17-B-like	6282	6115	5397	8248	7739	4936	5172	5592	9135	4098	5974	6045	4824	7470	7192
MSTRG.7777	LOC100168260	nucleolysin TIAR-like	6281	7028	6597	6088	5048	5412	6698	6686	5327	2843	5460	4959	6995	4181	5959
MSTRG.17819	LOC100167985	RRP12-like protein-like	6275	7327	7770	12523	9139	5389	7283	8711	11983	5162	5480	6415	6576	10766	9945
MSTRG.21122	LOC100573020	vitellogenin-6-like	6267	10235	4382	2119	2191	6181	6334	4821	1888	2927	6452	4417	3674	1791	3101
MSTRG.21243	LOC100167921	chorion peroxidase-like	6264	5958	1418	2720	3156	4478	3647	1940	2399	965	5097	2877	910	1933	2999
MSTRG.9478	LOC100164062	asparaginyl-tRNA synthetase, cytoplasmic-like	6245	8200	7866	9064	7303	5941	7623	8167	8404	4977	6248	6547	7725	7340	6833
MSTRG.16546	Lsg1	large subunit GTPase 1 homolog	6234	6810	6177	7121	7497	4953	5500	5848	6180	3546	5192	5388	6449	4983	6094
MSTRG.12267	LOC100159829	ubiquitin carboxyl-terminal hydrolase 5-like	6230	7621	10182	14612	10039	5848	7728	11214	13561	5330	5756	6566	9249	10673	11021
MSTRG.17313	Ndufs5	NADH dehydrogenase (ubiquinone) Fe-S protein 5, 15kDa (NADH-coenzyme Q reductase)	6230	5694	4519	5373	5801	5180	4852	4663	5560	4594	5982	5200	4268	5547	5297
MSTRG.17971	LOC100169604	lipase maturation factor 2-like	6225	7831	9716	18899	16158	6063	7239	10766	18397	8235	5742	6831	8161	14697	15939
MSTRG.8939	LOC100159955	lysocardiolipin acyltransferase 1-like	6224	6070	5558	8184	6680	5536	5137	5749	7768	4655	5702	5551	4597	6887	6885
MSTRG.15287	LOC115033063	#N/A	6209	5204	3054	4231	3672	5294	4224	3333	4655	4163	5810	4352	3086	4368	3885
MSTRG.10125	LOC100166173	uncharacterized LOC100166173	6207	4873	2059	277	923	6068	2567	1604	535	257	3765	2668	1573	340	1565
MSTRG.19344	LOC100167311	zinc finger protein 593-like	6200	7139	5229	8168	8159	5378	5769	6019	7445	5693	4856	4700	6626	7010	6627
MSTRG.11514	LOC100161615	inter-alpha (globulin) inhibitor H4-like	6193	7643	4073	4128	7824	6220	5364	5767	3779	7888	7005	4211	3927	3608	10298
MSTRG.15829	LOC100163570	regulator of chromosome condensation-like	6183	9090	11873	13450	9143	5485	8127	11714	11960	7066	5772	6516	9983	10643	9144
MSTRG.13532	LOC100162241	uncharacterized LOC100162241	6170	7767	7286	5844	6283	5497	6731	7605	4804	5718	5211	6484	8298	4851	6667
MSTRG.19885	LOC100158754	hydroxysteroid dehydrogenase-like protein 2-like	6170	6637	5123	8332	7578	5389	5345	5886	8317	7146	6041	5234	4681	7050	7373
MSTRG.19117	LOC100163269	#N/A	6170	7550	6958	12206	8365	5928	6385	8475	10702	6647	5412	5276	7059	9462	10164
MSTRG.3281	LOC100161977	maintenance of killer 16 protein-like	6169	7257	6903	9399	7972	5491	6508	7352	9823	5606	6235	7249	6670	9197	7531
MSTRG.5015	LOC100569297	uncharacterized LOC100569297	6156	7606	12190	9504	6509	7945	17814	12926	8492	9010	8119	8393	8926	6705	9104
MSTRG.21187	LOC100166001	dihydropteridine reductase-like	6156	6827	4989	4285	4550	5205	6026	4778	4377	3378	7119	5907	4326	3868	4183
MSTRG.5650	LOC100165246	NADH dehydrogenase [ubiquinone] 1 beta subcomplex subunit 9-like	6153	5453	3876	5151	4694	5189	4683	4134	5644	3433	5289	4911	3401	5258	4854
MSTRG.2848	LOC100160129	dnaJ homolog subfamily B member 11-like	6144	6325	5382	8072	7581	5547	5742	5452	7259	4264	6082	5690	4960	6141	6964
MSTRG.17754	LOC100164447	activated RNA polymerase II transcriptional coactivator p15-like	6143	10772	12224	13841	12125	5015	9526	12358	13938	5735	6895	10642	11562	11991	10783
MSTRG.5791	LOC100167773	serrate RNA effector molecule homolog	6138	7666	9670	11454	8911	5480	7657	10188	10543	6422	5751	6381	9347	9064	9075
MSTRG.13962	LOC100161294	B-cell receptor-associated protein 31-like	6135	7327	5232	3989	5856	6163	6320	5188	4024	4694	7114	6001	5280	3261	4899
MSTRG.10274	LOC100159988	uncharacterized LOC100159988	6134	5554	4237	5404	6009	5048	5067	4590	5491	3806	5766	5241	3855	5300	4793
MSTRG.7949	LOC100169006	28S ribosomal protein S5, mitochondrial-like	6128	5770	4905	6787	5050	5074	5524	5507	6998	2366	5178	5659	4554	5799	5763
MSTRG.19216	LOC100169090	protein phosphatase PP2A 55 kDa regulatory subunit-like	6126	6880	6898	10375	7392	5505	6269	7701	10060	5667	5456	5415	5983	8426	7776
MSTRG.12433	LOC100164663	superoxide dismutase [Mn], mitochondrial-like	6114	6381	4843	6995	6008	5511	5335	5269	7821	4405	6441	4744	4400	6779	6415
MSTRG.15944	LOC100168962	surfeit locus protein 6 homolog	6109	7271	6861	11058	9337	4844	6404	7591	11674	5513	5325	7693	6615	11099	8769
MSTRG.6884	LOC100167305	uncharacterized LOC100167305	6109	6667	5028	7057	7580	5678	5279	5249	7888	3976	6464	5527	4611	6224	6525
MSTRG.11382	LOC100164885	possible pseudogene or miscRNA, No KEGG entry	6100	12289	8732	13569	6728	4502	9995	13017	15694	4300	5173	6406	5240	19836	6766
MSTRG.21132	LOC100168731	proteasome subunit beta type-6-like	6098	7571	8080	10706	8654	5553	6946	8275	10556	4723	5983	6278	7129	8298	7953
MSTRG.6657	LOC100163534	seryl-tRNA synthetase, cytoplasmic-like	6092	6315	4660	4568	4431	4972	5357	4750	3954	3575	5607	4462	5037	3745	4920
MSTRG.11073	LOC100165053	membrane-bound alkaline phosphatase-like	6089	4677	2412	1099	2731	6000	4006	2540	1105	2580	6211	4377	2516	1523	2317
MSTRG.21394	LOC100166618	fatty acid synthase-like	6087	9996	1883	1037	789	6330	4407	2189	669	592	5144	2549	1106	697	1589
MSTRG.17382	LOC100167814	NADH dehydrogenase [ubiquinone] 1 beta subcomplex subunit 11, mitochondrial-like	6083	5449	4126	6107	5684	5246	4616	4623	6469	4326	5507	4812	3685	5733	5744
MSTRG.17855	LOC100168487	reticulon-4-interacting protein 1 homolog, mitochondrial-like	6083	10126	2873	2617	2767	5765	5630	2768	2586	1510	5803	4800	2320	2280	2343
MSTRG.19011	LOC100161323	uncharacterized LOC100161323	6081	7995	7631	10201	8592	5935	6628	8135	9164	6628	5729	6407	6965	8198	8345
MSTRG.6395	LOC100165388	ubiquitin-conjugating enzyme E2 N-like	6079	8004	7683	10268	8844	5131	7061	7694	9768	5077	5679	6460	7473	7847	7612
MSTRG.12487	LOC100160811	uncharacterized LOC100160811	6074	5481	6958	7969	5651	5341	7855	7419	12227	3993	5164	3628	9596	5534	10391
MSTRG.10634	LOC100165208	uncharacterized LOC100165208	6074	7396	6519	8696	7799	5846	6277	6679	7927	6276	6022	6548	6563	7676	6904
MSTRG.9122	LOC100159255	ubiquitin carboxyl-terminal hydrolase isozyme L5-like	6073	8068	9253	12697	11085	5345	7441	9651	12149	5974	6473	7494	9049	11213	9480
MSTRG.17384	LOC100158874	#N/A	6063	9400	12775	18203	12512	5518	8750	14373	18720	6727	6167	8002	11304	15549	13261
MSTRG.19916	LOC100164113	cuticle protein-like	6054	5895	548	232	647	6296	1965	517	110	416	7392	4333	604	101	553
MSTRG.17741	LOC100569154	androgen-induced gene 1 protein-like	6053	6092	2411	1776	1490	4872	3664	2746	1534	2277	4563	2771	1474	2023	1962
MSTRG.20954	LOC100169337	endochitinase-like	6050	5085	2922	1846	1591	6146	3983	2483	2002	1103	4570	3647	2647	1922	1221
MSTRG.15339	LOC100158849	serine/threonine-protein phosphatase 4 regulatory subunit 3-like	6045	7198	8402	14221	8521	5290	7047	9321	14090	5705	4818	5160	7588	11694	11242
MSTRG.16491	LOC100162735	piwi-like protein 1-like	6041	7330	7585	10310	8056	5520	7022	8185	9275	4310	5137	5535	7485	7343	8397
MSTRG.20677	Ndufa12	NADH dehydrogenase (ubiquinone) 1 alpha subcomplex, 12	6040	5640	3891	5264	5488	5413	4761	4069	6597	4551	5590	4745	3426	5647	5432
MSTRG.5535	Blvrb	biliverdin reductase B (flavin reductase (NADPH)) (EC:1.3.1.24)	6034	5825	4603	4935	4749	5684	5416	4651	4657	2745	5687	5061	4474	3969	4108
MSTRG.17056	LOC100158926	#N/A	6030	6524	7572	8808	6784	5314	6288	7925	8077	4294	5129	4452	6957	5932	7377
MSTRG.7724	LOC100167192	thioredoxin-like protein 1-like	6025	6990	6138	7093	6275	5020	5834	6099	6967	3377	5761	5951	5683	6136	5721
MSTRG.19936	LOC100167731	39S ribosomal protein L12, mitochondrial-like	6023	6539	5593	8852	7196	4882	5846	6263	9503	4080	5792	6242	4979	8133	7547
MSTRG.18239	LOC100164268	uncharacterized LOC100164268	6007	6684	5216	6761	5694	5583	4751	5737	6432	4880	5100	4945	3947	5893	5681
MSTRG.2636	LOC100169193	alpha-tocopherol transfer protein-like	5994	9113	3945	4221	1893	6279	6713	4562	4748	5250	5218	5486	2999	4856	1607
MSTRG.13198	LOC100160033	proton-coupled amino acid transporter 4-like	5990	5573	2107	1245	927	4706	3507	2132	1285	196	4613	2871	1448	1119	1664
MSTRG.2839	LOC100164839	kynurenine--oxoglutarate transaminase 3-like	5980	5707	3124	4009	4635	5311	4454	3612	3936	6859	5218	4046	2457	3368	4192
MSTRG.18276	LOC100160887	proteasome alpha 4 subunit-like	5978	7215	7592	11009	8181	4919	6780	8122	11419	4415	5302	6958	7173	9679	8847
MSTRG.17927	LOC100164806	2-oxoisovalerate dehydrogenase subunit alpha, mitochondrial-like	5976	6612	2562	2598	2248	5193	4374	2800	2523	2248	5440	4072	1853	2562	2001
MSTRG.20750	LOC100163939	uncharacterized LOC100163939	5974	5713	4937	6709	6895	5591	4712	5162	6005	6201	5335	4837	5001	6608	6017
MSTRG.7858	LOC100163442	proclotting enzyme-like	5965	7621	2481	2885	7007	4852	3549	2996	2489	4580	5365	3835	1999	3553	6670
MSTRG.8302	LOC100165264	nucleosome-remodeling factor subunit NURF301-like	5964	9790	10955	14187	11524	6311	8262	11880	12436	9731	5645	7797	9420	12618	11422
MSTRG.9428	LOC100165887	dyslexia-associated protein KIAA0319-like protein-like	5962	4619	3736	5291	4065	5291	4234	4255	5509	2928	4725	3377	3491	4416	4346
MSTRG.8211	LOC100165137	uncharacterized LOC100165137	5961	4467	1941	1353	4063	5203	3025	2173	1269	2359	5664	3133	1661	908	2629
MSTRG.8335	LOC100164766	40S ribosomal protein S21-like	5959	7491	8291	10531	10727	4692	6643	8371	10209	6699	5979	7249	7503	10415	9416
MSTRG.254	LOC100165070	sugar phosphate exchanger 2-like	5957	6462	4018	3908	3757	5332	4795	4199	3597	2726	5566	4394	3922	3060	5391
MSTRG.12496	LOC100165595	uncharacterized LOC100165595	5948	6630	5258	5265	6677	5166	5537	6250	4669	6461	5661	4911	6119	3862	5630
MSTRG.3205	Catb-84	cathepsin B-84	5938	833	1087	1140	838	4410	2648	1557	2854	2641	7704	5235	2889	877	981
MSTRG.7934	LOC100161631	transmembrane protein 165-like	5930	4690	4193	4870	3982	5234	4451	4028	4761	2521	5342	4467	3926	4250	3721
MSTRG.20690	LOC100569954	probable maltase L-like	5929	7302	1322	1294	2804	7732	3123	953	1670	10060	10618	3419	4207	440	2207
MSTRG.15132	LOC100164048	brain protein 44-like	5918	5258	3577	4109	3899	5096	4582	3700	3813	2717	5756	4396	2960	3581	3401
MSTRG.7708	LOC100158993	importin subunit beta-like	5918	6790	6769	7258	5462	4899	5705	6922	6904	2517	4685	4749	4928	5027	5894
MSTRG.12143	LOC100169052	glycine cleavage system h protein-like (GCSH)	5910	6671	3459	5154	4009	4636	4798	4010	5539	2463	5014	4856	2367	4597	4347
MSTRG.8928	LOC100160953	CG7781-like	5909	4684	1655	2232	4461	6540	2903	2059	2252	2946	5976	2818	1596	2327	2670
MSTRG.19894	LOC100163615	uncharacterized LOC100163615	5909	9506	4929	6849	10738	5409	7836	6035	6864	13394	7330	5842	5463	7719	8512
MSTRG.6191	Cp47	cuticular protein 47	5907	1955	1182	148	3821	3957	1415	809	356	712	4778	2356	1404	174	4026
MSTRG.16879	Isy1	pre-mRNA-splicing factor ISY1 homolog	5906	8561	10361	17177	13281	5066	8463	11436	17542	7857	6050	8375	10323	14940	12455
MSTRG.5534	LOC100162426	signal recognition particle 72 kDa protein-like	5905	6310	6313	9286	7438	5465	6364	7058	8683	3865	5744	5857	6167	7762	8048
MSTRG.16207	LOC100167224	probable phospholipid-transporting ATPase IIB-like	5902	6779	4905	6415	4857	4814	5020	5433	6122	3962	4422	3804	4544	5523	5203
MSTRG.7879	Tapdelta	translocon-associated protein delta	5901	6473	5996	6720	8409	5076	5690	6175	6193	4535	6019	5895	6182	5001	6794
MSTRG.6960	LOC100168720	methylcrotonoyl-CoA carboxylase beta chain, mitochondrial-like	5890	7720	3296	4302	4085	5078	4760	4358	4092	5603	5341	4319	2620	4071	3246
MSTRG.20045	LOC100163051	probable ATP-dependent RNA helicase DDX5-like	5885	7964	6490	7409	5974	6776	5104	6802	6204	5149	6055	4386	6239	5058	6057
MSTRG.7671	LOC100166357	Organic acid transporter	5882	3759	4071	2373	1800	6363	4584	2850	2852	975	5144	5228	3373	2523	2220
MSTRG.9350	LOC100160207	cytoplasmic phosphatidylinositol transfer protein 1-like	5879	8136	9037	10428	7453	5675	7408	9232	9333	5006	5397	5810	7687	7469	8565
MSTRG.17155	LOC103308803	#N/A	5873	5483	3614	3216	3878	4894	4490	3947	2953	3064	5667	4396	4347	2639	3460
MSTRG.12160	LOC100164208	uncharacterized LOC100164208	5865	7635	7065	7232	7700	5291	6724	7630	6508	6923	5647	5589	7152	5491	7048
MSTRG.16839	P5cr	pyrroline 5-carboyxlate reductase	5865	5870	4582	5646	3977	5150	5553	4696	6183	2393	5241	5784	3278	5607	4389
MSTRG.5429	Ldca	putative LD carboxypeptidase	5864	6014	3664	2725	2324	4767	4816	3329	3286	2308	5251	4199	2676	2270	1262
MSTRG.6798	LOC100167237	transmembrane trafficking protein-like	5857	6151	5040	8948	8262	4977	5440	5622	9525	4763	5431	5595	4219	8359	8538
MSTRG.6704	LOC100161922	adenine phosphoribosyltransferase-like	5849	6360	5466	6600	4626	4797	6395	5147	6884	2424	5348	6058	3927	6036	4048
MSTRG.10248	Aats-asp	aspartyl-tRNA synthetase (EC:6.1.1.12)	5849	7162	7926	10147	7925	5335	6676	8293	10142	3760	4672	6115	6408	8704	8357
MSTRG.18097	LOC100162316	interferon-related developmental regulator 2-like	5840	6491	4751	5512	5370	5276	5401	5503	5105	5284	5499	4454	4933	4388	5088
MSTRG.16637	LOC100163764	carboxypeptidase M-like	5839	4993	2231	3940	6813	6101	2749	2429	3104	3793	5525	3237	2748	2577	5101
MSTRG.21289	LOC100169317	uncharacterized LOC100169317	5836	2138	336	172	2204	7419	1027	575	142	1214	8627	1966	359	127	1638
MSTRG.19317	LOC100166186	prolyl 4-hydroxylase subunit alpha-2-like	5832	6343	4106	6454	6581	5573	4340	4019	5951	4065	5565	4231	4295	5237	6164
MSTRG.6326	LOC100169320	probable protein phosphatase 2C T23F11.1-like	5828	6172	6359	9677	7582	5402	5756	6705	9212	4945	5202	5313	6020	7948	7028
MSTRG.11989	LOC100166777	uncharacterized LOC100166777	5823	8601	2878	1464	2791	4956	5005	4447	1173	5272	6247	4066	2871	1160	2594
MSTRG.9803	LOC100167180	3-ketoacyl-CoA thiolase, mitochondrial-like	5823	5148	4207	6034	9304	5400	4742	4492	6471	10578	5442	4406	4012	5215	6652
MSTRG.1167	LOC100166700	pumilio domain-containing protein KIAA0020 homolog	5820	7380	7566	11155	7803	5289	6679	7943	11231	4369	5463	7009	6227	9485	8669
MSTRG.10897	LOC100160586	hydroxymethylglutaryl-CoA lyase, mitochondrial-like	5815	7004	3601	2984	3991	6404	5995	4889	2391	11148	7246	5283	3711	3146	3370
MSTRG.1906	LOC100161575	monocarboxylate transporter 12-B-like	5815	6052	3093	2904	2401	4881	4695	3394	3296	1858	5049	4029	2573	3026	3286
MSTRG.9200	LOC100163305	mevalonate kinase-like	5808	6070	5001	8837	6964	5554	5129	5267	9145	3854	5553	4770	4332	7103	7577
MSTRG.13847	LOC100163775	microsomal glutathione S-transferase 1-like	5804	4770	4097	4968	6452	5569	4251	4150	4802	4886	5657	4556	5064	4439	5034
MSTRG.10214	LOC100161067	u4/U6 small nuclear ribonucleoprotein Prp31-like	5803	7563	8074	11117	9080	5212	6831	8604	10602	6147	4962	6146	7515	9947	8232
MSTRG.13172	LOC100575819	putative fatty acyl-CoA reductase CG5065-like	5774	4577	1921	1283	287	6010	3965	839	1597	125	3311	4341	1371	1624	206
MSTRG.12415	LOC100168209	aldehyde dehydrogenase, dimeric NADP-preferring-like	5771	5855	4663	6317	5255	6379	5982	4517	6391	2987	4841	4186	3746	5293	5226
MSTRG.21605	LOC100162838	uncharacterized LOC100162838	5768	7571	6341	7848	8059	5912	6244	6659	7230	8527	5545	5502	5530	7430	7010
MSTRG.13439	LOC100159750	uncharacterized protein LOC100159750	5767	1397	75	17	542	4752	755	189	13	28	6402	1428	141	7	337
MSTRG.14184	LOC100162362	#N/A	5762	6226	4392	4992	4345	5406	5540	4446	4949	3219	5872	4741	2904	3843	3839
MSTRG.12524	LOC100168596	phospholipase A-2-activating protein-like	5761	6155	6798	9330	6825	4986	6027	7356	8866	3964	4818	3576	6230	6750	7223
MSTRG.2827	LOC100160648	uncharacterized LOC100160648	5753	5653	2853	2446	5636	4557	3548	3157	2173	3026	4254	3451	3447	1555	5140
MSTRG.15381	LOC100164847	uncharacterized LOC100164847	5751	5890	5117	6926	6258	4739	4812	5512	6886	3971	5237	5985	4944	6434	6242
MSTRG.7262	LOC100167469	guanine nucleotide-binding protein-like 3 homolog	5748	5722	4699	7071	5925	5043	4752	5100	6400	4944	4776	4607	4449	5766	5727
MSTRG.8416	LOC100165526	uncharacterized LOC100165526	5741	7519	8132	13240	10643	5372	6178	8505	14044	6011	5146	7179	6484	12680	10340
MSTRG.15514	LOC100569084	UPF0327 protein C1orf151-like	5724	5665	4002	4177	5405	4824	4618	4311	4742	4557	5906	5061	3889	4269	3769
MSTRG.10417	LOC100161133	uncharacterized LOC100161133	5723	7089	2063	2652	3492	5110	4381	2719	2057	1876	4895	3182	1787	2775	3374
MSTRG.597	LOC100162393	uncharacterized LOC100162393	5720	4243	629	330	1468	5435	1718	682	398	2259	6625	2430	404	407	941
MSTRG.21779	LOC100160516	RNA-binding protein PNO1-like	5714	6475	5658	5254	6281	4771	5106	5303	4827	6653	5516	5289	3660	4311	4890
MSTRG.4868	Psmb2	proteasome beta 2 subunit (EC:3.4.25.1)	5708	6929	7998	11614	8423	5090	6858	8925	12182	4791	5380	6652	7693	10232	9257
MSTRG.19361	LOC100159559	lysosomal alpha-mannosidase-like	5698	8009	2260	2941	3775	5294	4764	2820	2363	6135	4753	3634	2408	2730	3693
MSTRG.7465	LOC100162033	UDP-glucose:glycoprotein glucosyltransferase-like	5675	5954	6182	9886	7793	5222	5783	6584	9893	3749	4683	4551	4587	8001	8259
MSTRG.7804	LOC100160427	pantothenate kinase 1-like	5668	5480	2814	3510	2989	4884	4421	3222	4210	3497	3988	3667	2381	2750	3547
MSTRG.8323	LOC100166941	#N/A	5667	7322	3344	2814	3834	5825	5384	3948	2269	4396	6638	4285	3731	2191	3697
MSTRG.20585	Npepl1	aminopeptidase-like 1	5661	6382	7134	10896	7667	5148	5657	7430	10886	4334	5345	5835	6564	8796	7987
MSTRG.11019	LOC100161722	uncharacterized LOC100161722	5655	8016	8541	13751	10936	5084	7261	9143	14226	6377	5828	7973	7281	13416	10781
MSTRG.11449	LOC100166774	RNA-binding protein 28-like	5653	7292	6326	10328	7913	4665	5956	6619	9628	5667	5226	6414	5359	8783	7675
MSTRG.5004	Nop16	NOP16 nucleolar protein homolog	5653	6697	6239	9467	7927	4346	5940	6841	10623	4250	5415	6627	5400	9220	8026
MSTRG.18329	LOC100161096	annexin-B11-like	5652	6095	4298	5303	5034	5255	5127	4301	5668	3040	5250	4040	4107	4377	5807
MSTRG.20180	LOC100160691	lysosomal-associated transmembrane protein 4A-like	5645	6373	4500	6413	6211	5167	5326	5019	6183	5743	5504	4563	4017	5175	6158
MSTRG.19771	LOC100163497	thioredoxin peroxidase 2-like	5640	6934	9016	13467	10221	4877	6459	9885	12988	6596	4963	6374	8984	11382	10510
MSTRG.16691	LOC100168801	src substrate cortactin-like	5637	5809	5945	9039	9168	5093	5279	5947	9609	5858	4770	5578	5618	8608	7165
MSTRG.15109	LOC100168534	something about silencing protein 10-like	5629	5814	5989	9832	6936	5118	6020	6691	10111	3916	4834	6520	5119	9274	7574
MSTRG.6904	LOC100165479	isoleucyl-tRNA synthetase, cytoplasmic-like	5622	6349	6831	9578	6772	5065	6305	7462	8981	3511	4998	5143	6498	7431	7902
MSTRG.5737	LOC100160364	fibroblast growth factor receptor 2-like	5621	6213	1843	2360	3874	4273	4076	3638	2164	8404	5033	3099	1460	2398	2839
MSTRG.15987	LOC100169331	protein lethal(2)essential for life-like	5618	3291	834	351	423	4965	2185	712	333	439	7664	2691	445	387	386
MSTRG.20447	Aqp1	aquaporin	5613	3362	2034	1940	2697	4786	2804	1735	2592	2084	5478	3342	2314	1451	2195
MSTRG.17013	LOC100166546	acyl-CoA Delta(11) desaturase-like	5609	5269	4082	2635	2857	4831	5023	3818	2515	2356	5054	4723	4587	2236	2721
MSTRG.11477	LOC100163910	uncharacterized LOC100163910	5607	7156	4620	2964	3352	5094	5210	4963	2414	3245	5604	3607	4930	2033	3266
MSTRG.9617	LOC100161093	uncharacterized LOC100161093	5595	6538	4768	4900	4180	5115	5426	4956	2937	3952	5338	4443	4589	3544	4407
MSTRG.10009	LOC100168211	uncharacterized LOC100168211	5592	5655	2352	1626	1692	4787	3515	2808	1244	1827	4427	2480	2173	1170	1881
MSTRG.20115	LOC100144890	macrophage migration inhibitory factor-like protein	5591	3021	1272	3742	6242	4514	2380	1015	4881	2714	4634	2419	836	3327	6059
MSTRG.10133	LOC100165534	cysteine and histidine-rich protein 1 homolog	5588	7631	4293	6580	7934	6508	4754	5134	6217	7330	5827	4043	4871	6315	7893
MSTRG.19301	LOC100160016	phosphatidylinositol glycan, class P-like	5588	5268	5006	6811	5881	4916	5216	5351	7172	2724	5400	5226	4304	5428	5992
MSTRG.14079	LOC100168026	heat shock protein 70 B2-like	5583	4086	871	396	964	5120	2265	917	330	649	8172	2715	555	345	635
MSTRG.9470	LOC100159416	uncharacterized protein C6orf136 homolog	5577	5204	3539	3738	3790	4844	4148	3395	3852	3217	4834	4025	3183	3376	3486
MSTRG.15352	LOC100169094	pre-mRNA-splicing factor RBM22-like	5575	6962	8213	7931	8475	4982	6384	7568	6823	5712	5142	5862	9007	6121	6625
MSTRG.7606	LOC100168333	transcription elongation factor SPT5-like	5566	7292	7097	5937	6947	4802	6345	7155	5423	5674	5539	5702	7915	5046	6998
MSTRG.13623	LOC100168957	pre-mRNA-splicing factor CWC22 homolog	5563	7362	6842	8895	7875	4637	6554	7114	7934	6220	4944	6318	7052	7853	6514
MSTRG.14527	LOC100165453	probable ATP-dependent RNA helicase DDX43-like	5558	4619	3691	4846	4754	4442	4148	4123	4599	2186	3637	3545	4488	3915	3700
MSTRG.6368	LOC100159370	probable NADH dehydrogenase [ubiquinone] iron-sulfur protein 6, mitochondrial-like	5553	5178	3776	3358	4614	4664	4341	3698	3259	3574	5103	4600	3605	2757	3207
MSTRG.18153	LOC100163280	alpha-taxilin-like	5538	7090	7936	11334	10089	5084	6591	8150	11282	7219	5232	6065	7440	10082	9394
MSTRG.13796	LOC100162313	uncharacterized LOC100162313	5531	6154	8141	7499	6446	4901	6238	9465	6374	4790	4197	3840	7588	5507	7121
MSTRG.19744	LOC100163759	lysosomal Pro-X carboxypeptidase-like	5526	514	509	319	425	4328	1673	665	957	261	4767	3003	1303	412	676
MSTRG.6262	LOC100166423	uncharacterized LOC100166423	5524	6670	5811	4470	6084	5351	5914	6046	3813	6180	6550	6089	6521	3233	5275
MSTRG.139	LOC100166936	MAP/microtubule affinity-regulating kinase 3-like	5518	6668	4461	4785	4622	5252	5677	5329	4229	6078	5282	3922	4657	2614	5213
MSTRG.14273	LOC100160817	uncharacterized LOC100160817	5514	5291	4380	6824	5673	5179	4236	5215	6716	4561	4495	3507	4228	5652	5918
MSTRG.17966	LOC100167548	glutathione S-transferase omega-1-like	5514	6139	5399	7683	8159	5326	4790	5525	7512	5887	5453	4778	5287	6724	7069
MSTRG.12611	LOC100164941	uncharacterized LOC100164941	5513	7685	4685	2823	4614	5620	4793	5559	2338	3912	4652	3477	5433	1815	4934
MSTRG.6569	Cdc42	cell division cycle 42	5512	5994	6435	10033	7490	5052	5745	7007	10688	5074	4996	5047	6377	8682	8119
MSTRG.5234	LOC100167115	uncharacterized LOC100167115	5498	10347	6174	5173	3356	4947	7449	7691	5024	3382	5252	5351	5189	4892	4580
MSTRG.11344	LOC100159423	uncharacterized LOC100159423	5496	8230	4375	1958	1267	5953	5904	3954	1110	1916	5759	4895	3496	1245	1371
MSTRG.16136	LOC103309634	#N/A	5492	6219	7714	10542	8676	5432	6386	7708	9651	7470	5212	6117	7066	9208	8404
MSTRG.12736	LOC100167226	structural maintenance of chromosomes protein 1A-like	5491	7748	10972	15824	11098	4882	7299	11262	14699	7351	5074	6364	10877	12748	11288
MSTRG.20668	LOC100166389	EH domain-containing protein 1-like	5488	5870	4234	4428	5830	5671	5388	4169	4189	6916	5457	4681	4219	3729	4828
MSTRG.9229	LOC103310425	#N/A	5487	5591	5146	7118	5687	4582	5160	5803	6901	3353	4341	4811	4615	5672	5754
MSTRG.13149	LOC100167435	uncharacterized LOC100167435	5486	6740	6779	7933	6780	5487	6410	7553	6300	4427	4441	5295	6739	6253	6504
MSTRG.17063	LOC100160599	amidophosphoribosyltransferase-like	5473	5575	4865	5592	4070	4209	5181	4714	4924	2804	5248	4114	4148	4020	4213
MSTRG.3228	LOC100169376	uncharacterized LOC100169376	5467	2612	174	17	2206	6701	1036	132	85	716	6858	2345	289	10	588
MSTRG.10459	LOC100159258	ribosome biogenesis protein WDR12 homolog	5464	5784	5745	8119	6416	4538	5447	6525	8470	3366	4563	5818	5556	7044	6377
MSTRG.7164	LOC100165723	protein fem-1 homolog CG6966-like	5460	6337	4191	2978	3868	4805	5032	4271	2899	5538	5823	4302	5385	2780	3946
MSTRG.22032	LOC100570788	serine/threonine-protein phosphatase 5-like	5454	6161	7062	8223	6833	4508	5841	7035	8445	3462	5459	5930	6900	7405	6818
MSTRG.21383	LOC100162568	acyl-CoA synthetase family member 2, mitochondrial-like	5451	4665	1937	1325	1318	6190	3410	1896	1183	2214	4758	3329	1950	1298	1524
MSTRG.6556	LOC100575143	#N/A	5449	5575	6317	9398	7502	4884	5331	6804	9054	4643	4693	4432	5851	7587	7258
MSTRG.1166	LOC100159892	small glutamine-rich tetratricopeptide repeat-containing protein alpha-like	5446	6810	6759	10828	8485	4912	6142	7420	11030	5154	5339	6186	6671	9164	8281
MSTRG.7507	LOC100167849	AP-2 complex subunit beta-like	5444	5983	6409	8277	8001	5326	5352	6247	7566	4828	5289	5148	6539	6388	7326
MSTRG.16360	LOC100164525	#N/A	5441	5432	4455	7283	6577	4897	4618	4990	7592	4925	4292	4562	3943	6880	6251
MSTRG.17326	LOC100158965	c-terminal-binding protein-like	5440	7390	6990	9111	6124	4338	6375	7417	8678	4369	4756	4468	5148	6958	7306
MSTRG.17320	LOC100165130	active transporters; equilibrative nucleoside transporter; similar to AGAP003892-PA	5434	7265	8298	12798	8232	4486	6583	9179	11837	4653	5180	4627	5981	9037	10003
MSTRG.9435	LOC100166022	serine/arginine-rich splicing factor 1-like	5431	7780	7822	5578	6355	4941	7226	7403	4910	5454	5447	6867	8861	4509	6288
MSTRG.14050	LOC100168225	guanine nucleotide-binding protein G(I)/G(S)/G(T) subunit beta-1-like	5429	5786	4545	6476	7045	5508	4491	4695	5493	5469	5129	4766	4685	4329	6421
MSTRG.15485	LOC100575183	uncharacterized LOC100575183	5414	5657	4859	9377	7668	5138	4137	4896	9885	6180	4674	5074	3256	9233	7666
MSTRG.20256	LOC100162755	n-alpha-acetyltransferase 16, NatA auxiliary subunit-like	5411	6488	6293	7353	5233	4619	5624	6855	6647	2923	4305	4291	5766	5146	5357
MSTRG.7228	LOC100166670	AP-3 complex subunit delta-1-like	5408	5922	6896	11330	8505	5590	5876	6598	10212	4373	4521	5644	4698	10460	7481
MSTRG.6499	LOC100162791	uncharacterized LOC100162791	5404	3310	298	275	180	6684	1923	585	244	152	8094	2805	570	132	44
MSTRG.12194	LOC100571497	mitochondrial import inner membrane translocase subunit Tim10-like	5404	5214	4849	7918	6849	4664	4861	5245	7988	3326	5096	5494	4411	6919	6972
MSTRG.1907	LOC100161454	non-specific lipid-transfer protein-like	5400	4664	3478	4360	4497	5546	4879	3333	4329	4772	4471	4018	3146	3730	4378
MSTRG.3274	Ctsk1	cathepsin K-1, Ctsk1	5395	6183	7094	10807	8693	4663	5707	7356	11059	6089	4933	4584	6236	8765	8703
MSTRG.9356	LOC100163609	eukaryotic translation initiation factor 3 subunit E-like	5395	7482	9948	13871	10235	5151	7562	11435	14159	4840	5709	7006	8277	12087	11368
MSTRG.19616	Cpap3-c	cuticular protein analogous to peritrophins 3-C	5385	6753	2339	2520	7530	3884	4170	2545	2240	5871	6619	3478	2754	1596	6002
MSTRG.11585	LOC100160520	myelin expression factor 2-like	5384	7564	8809	11199	8784	4888	7233	8722	10187	4947	5447	6473	8574	8684	8479
MSTRG.7592	LOC100168304	inositol monophosphatase 1-like	5384	5084	3621	4041	3729	4326	3977	3331	3765	2836	4657	3912	3117	3210	3412
MSTRG.13851	Dap	death-associated protein	5383	6117	6032	5230	7213	3722	5736	7122	5687	8177	5017	4908	7916	5044	6271
MSTRG.1067	LOC100164477	spondin-1-like	5382	6630	2822	2291	2683	4549	4096	3271	2089	3839	4601	3430	2173	2208	3245
MSTRG.18116	LOC100162233	secretory carrier-associated membrane protein 1-like	5377	5562	4910	6711	5789	4876	5029	5212	6527	3890	5175	4727	4423	5388	6020
MSTRG.17191	LOC100158747	Vap-33-1-like	5373	5736	5017	5756	5639	4499	5228	5278	5524	3778	4504	4422	5166	4573	5263
MSTRG.11037	LOC100160517	ATP-sensitive inward rectifier potassium channel 12-like, active transporters; similar to inwardly rectifying k+ channel	5368	5510	3408	2200	2043	4227	4270	3412	2006	1466	4434	4283	1793	1738	1977
MSTRG.10760	LOC100302321	uncharacterized protein LOC100302321	5368	5202	3738	5758	5784	5020	3782	4004	5635	4444	4941	3242	2926	4688	5498
MSTRG.5891	LOC100168103	decaprenyl-diphosphate synthase subunit 2-like	5348	4288	2908	4168	4388	5301	3385	2915	4392	2764	4384	3450	2678	3575	4190
MSTRG.8965	LOC100162813	RNA polymerase I-specific transcription initiation factor RRN3-like	5336	5644	5545	8248	6555	4700	4558	5503	8498	5108	4045	5252	4169	7345	6521
MSTRG.12984	LOC100169164	cell division cycle 5-like protein-like	5334	7021	7428	8672	7011	4899	6471	7389	7501	5122	4960	5497	7606	7059	6633
MSTRG.21790	LOC100159014	NADH dehydrogenase [ubiquinone] 1 beta subcomplex subunit 7-like	5330	7874	5283	5157	7221	4565	4296	5642	5833	3934	5168	4670	4817	4935	4790
MSTRG.17525	LOC100165029	protein DJ-1-like	5329	6197	5501	7174	7942	4933	5913	5692	7391	4636	5675	5694	5450	6643	6016
MSTRG.11418	LOC100159096	progestin and adipoQ receptor family member 3-like	5319	4570	2620	2198	1629	4673	3485	1919	2821	2722	4599	4219	2468	2634	1671
MSTRG.12622	LOC100159790	ATP-binding cassette sub-family A member 1-like	5309	7818	3797	1673	2553	4059	5929	4361	1484	3473	5334	3892	3597	1090	2670
MSTRG.12610	LOC100163913	myosin regulatory light chain-like	5308	6611	7207	9067	8912	4908	5836	6920	8867	8152	5431	5551	7887	7696	8311
MSTRG.7010	LOC100162634	uncharacterized LOC100162634	5304	6360	8089	11356	15122	7446	5755	8128	11584	12164	6036	5424	7606	11294	11242
MSTRG.16704	LOC100169258	organic cation transporter-like protein-like	5303	5002	3431	4484	3305	3883	4364	4282	3722	4153	5322	2979	2896	3620	3697
MSTRG.7633	LOC100166606	uncharacterized LOC100166606	5298	4023	1581	2721	866	5306	1306	1068	2061	146	5274	2122	1498	2090	261
MSTRG.11031	LOC100169406	uncharacterized LOC100169406	5287	7715	6888	9219	7627	5066	5907	6900	8478	4536	6028	5936	6777	6962	7822
MSTRG.21972	LOC100169407	jmjC domain-containing histone demethylation protein 1-like	5286	6258	5678	4757	5238	4679	5756	6256	4088	5514	4349	4365	6737	3638	4892
MSTRG.19643	LOC100169563	uncharacterized LOC100169563	5280	6620	5378	9387	8176	4925	5789	5624	8574	7265	4924	5358	5485	8469	7581
MSTRG.14174	Ctps	CTP synthase (EC:6.3.4.2)	5275	5928	6662	7105	5577	4242	5785	6923	7430	2640	4517	4960	5850	5899	5489
MSTRG.10094	LOC100169377	GrpE protein homolog, mitochondrial	5267	5522	4605	7573	5847	4274	4589	5486	7797	3091	4983	4895	3973	6478	6395
MSTRG.3375	LOC100158856	protein ERGIC-53-like	5263	4681	3652	4974	4976	4288	4260	4137	4834	2939	4590	3493	3524	3792	4938
MSTRG.21897	LOC100159689	cleft lip and palate transmembrane protein 1 homolog	5262	5081	4227	5294	3816	4933	4831	4535	4985	2421	4368	3833	2994	4053	4926
MSTRG.20736	LOC100159932	uncharacterized protein LOC100159932	5262	1619	173	195	297	5474	1086	316	185	103	6928	2587	350	202	134
MSTRG.10265	LOC100166830	putative pre-mRNA-splicing factor ATP-dependent RNA helicase DHX15-like	5259	6551	7257	8823	6511	4208	6843	9153	9213	4307	4762	4086	7898	6244	8143
MSTRG.7415	LOC100166196	uncharacterized LOC100166196	5257	4913	4302	6000	4920	4751	4374	4548	6417	2369	4844	4577	4023	5334	5020
MSTRG.21041	LOC100167524	ubiquitin-conjugating enzyme rad6-like	5257	4512	4107	6805	6282	4543	4200	4683	6813	4635	5020	4320	4169	6143	6318
MSTRG.6584	LOC100168078	poly(U)-binding-splicing factor half pint-like	5256	6297	7179	8978	8318	4819	5342	7024	8804	6961	4929	5091	7243	7289	7611
MSTRG.13787	LOC100167977	protein kinase C and casein kinase substrate in neurons protein 2-like	5252	5066	3780	3395	4154	4852	4517	3888	4038	3638	4864	3860	3763	2686	3969
MSTRG.18692	LOC100160902	cullin-1-like	5247	6045	6807	8141	6691	4800	5733	7130	7845	4597	4524	4948	6992	6089	6235
MSTRG.9038	LOC100163211	uncharacterized LOC100163211	5241	7523	9123	15265	9304	4658	6522	9841	15615	5485	5433	7146	7554	14150	10351
MSTRG.574	LOC100159646	steroid dehydrogenase-like	5240	9759	2445	976	1884	4543	3454	2595	1051	1365	7832	4406	2104	999	1415
MSTRG.14098	LOC100165720	NAD kinase-like	5238	5490	3607	3456	3605	4930	3865	3591	3472	4884	4564	3727	3146	3059	3779
MSTRG.10240	LOC100159010	uncharacterized LOC100159010	5236	1240	77	204	210	4803	552	319	102	129	5043	1413	271	121	102
MSTRG.12320	LOC100162909	uncharacterized LOC100162909	5235	6243	6006	8421	7804	4466	5416	6061	7412	6545	4879	5705	6511	7258	6852
MSTRG.6459	LOC100161216	LIM domain protein	5231	5537	4248	5429	6283	4423	4402	4670	5286	3898	4512	4092	4263	4161	5593
MSTRG.12942	LOC100161244	N-terminal acetyltransferase complex ARD1 subunit homolog B-like	5226	6932	6413	11251	8510	4952	6591	7353	11896	4950	5443	6546	5661	9779	9279
MSTRG.11197	LOC100159853	#N/A	5225	6365	7111	11044	8700	4729	5765	7670	11021	5893	4655	5932	6860	9659	8917
MSTRG.9740	LOC100161467	synaptic vesicle glycoprotein 2B-like	5224	2571	1882	1506	1840	5503	2466	1849	1922	2738	4634	2858	2773	1509	1843
MSTRG.6887	LOC100160429	synaptic vesicle membrane protein VAT-1 homolog-like	5220	12281	14659	13695	11086	5484	13195	15695	13370	6990	6632	9809	15540	11048	12774
MSTRG.21657	LOC100164699	WD repeat-containing protein 26-like	5219	5299	5161	5887	5442	4619	5238	5681	4755	4467	4243	4235	4868	4410	4761
MSTRG.12563	LOC100166238	cytosolic non-specific dipeptidase-like	5219	5608	5434	9610	6564	4347	5513	6169	9412	3081	4255	4520	4896	7590	6544
MSTRG.17591	LOC100302105	uncharacterized LOC100302105	5204	4911	3725	5979	5575	4256	3991	3955	6224	3984	4795	4408	3482	5736	5672
MSTRG.17440	LOC100161502	heat shock 70 kDa protein 14-like	5202	5990	6880	10540	7604	4685	6173	7645	10358	3098	4741	6305	5772	8350	8042
MSTRG.6074	LOC100164653	ribosomal RNA-processing protein 8-like	5201	5731	6138	9383	7634	4117	5332	6994	10237	5535	4562	5739	5690	8649	7296
MSTRG.9611	LOC100167363	casein kinase I isoform delta-B-like	5201	7309	7039	8965	7588	4413	5464	7640	8265	6292	4680	5292	6722	7450	7814
MSTRG.19300	Enpep	glutamyl aminopeptidase (EC:3.4.11.7)	5199	6780	5491	5384	4989	4521	5621	5715	5228	3348	5161	4509	3789	4679	5204
MSTRG.16027	LOC100165648	uncharacterized LOC100165648	5197	6494	6577	10222	7366	4927	5940	7682	10421	4455	4686	5565	5836	8652	8602
MSTRG.23503	LOC100159741	NADPH--cytochrome P450 reductase-like	5195	3113	1325	1194	1241	4670	2588	1477	1585	2200	5850	2205	2056	1062	1316
MSTRG.17291	LOC100166400	structural maintenance of chromosomes protein 2-like	5191	5642	4939	29743	11193	8662	9384	13225	10987	9753	5365	4537	9702	17882	7216
MSTRG.2142	LOC100166702	uncharacterized LOC100166702	5189	1236	143	157	579	4728	691	190	101	32	4307	1406	76	68	390
MSTRG.18727	LOC100167783	serine/threonine-protein kinase Doa-like	5188	6184	5647	7354	6578	4689	5549	6434	6779	6986	4409	4325	5674	5638	5802
MSTRG.2491	LOC100168135	#N/A	5186	5427	6386	11353	9038	5124	4860	6401	10564	6193	4506	4574	5197	9418	8439
MSTRG.8020	LOC100162876	cyclin-dependent kinase 10-like	5183	7311	9584	14824	11135	4749	7025	10316	15375	5821	5066	7127	9387	13571	12010
MSTRG.17695	LOC100162976	translocating chain-associated membrane protein 1-like 1-like	5180	4657	3232	4109	4910	5055	4221	3583	4042	1793	4806	4017	3116	3198	4344
MSTRG.21896	LOC100161740	zinc finger protein 622-like	5179	5530	5852	7755	6559	4375	5177	6233	7472	4302	4457	5159	6409	6461	6096
MSTRG.19387	LOC100161840	ruvB-like helicase 1-like	5174	7285	9022	13707	8092	4273	7625	10484	13976	3600	4982	7170	8453	11185	9373
MSTRG.15665	LOC100164103	microtubule-actin cross-linking factor 1, isoforms 1/2/3/5-like	5172	5444	4739	2716	5208	4875	5238	5323	2261	4637	5226	4082	4336	2442	5042
MSTRG.13013	LOC100168146	vacuolar protein sorting-associated protein 13C-like	5167	6948	6000	10012	7794	4836	5370	6183	9952	6087	4584	5360	4132	8025	8029
MSTRG.19288	LOC100167330	uncharacterized LOC100167330	5163	5193	4470	6644	5282	4482	4758	4851	6421	2955	4574	4385	4197	5229	4958
MSTRG.6863	LOC100161796	dolichyl-diphosphooligosaccharide--protein glycosyltransferase subunit 2-like	5163	5819	6298	10971	7938	4519	5857	6920	10763	3375	4167	4344	4487	8105	8680
MSTRG.5513	LOC100168975	possible pseudogene or miscRNA, No KEGG entry	5154	4961	3024	1833	1797	6083	4739	2364	1699	1365	5968	5773	2830	2015	2086
MSTRG.2774	LOC100162144	uncharacterized LOC100162144	5154	6882	8027	11397	9450	4731	5611	8478	11833	7264	4768	6418	7038	10558	8902
MSTRG.3321	LOC100162409	uncharacterized LOC100162409	5151	1593	1246	1157	937	4567	2180	1307	2003	1792	5712	3150	2085	1252	962
MSTRG.19773	LOC100165557	uncharacterized LOC100165557	5137	10165	9644	7772	8631	4733	8638	10904	6987	7252	5794	5744	8889	5769	7917
MSTRG.13927	LOC100161586	ER degradation-enhancing alpha-mannosidase-like 3-like	5133	4565	4256	6005	5177	4648	3983	4318	5824	3075	4636	3310	3662	5041	5168
MSTRG.14510	LOC100572712	possible pseudogene or miscRNA, No KEGG entry	5130	5673	5200	8378	5551	5346	4745	5123	8418	4485	4825	4840	4353	7855	5112
MSTRG.5468	LOC100159254	RNA-binding protein NOB1-like	5130	5566	4960	5814	6266	4651	4718	4850	5700	5109	4859	4390	5108	5462	5500
MSTRG.15297	LOC100168151	cGMP-dependent protein kinase foraging	5130	4658	3660	3291	4013	4975	4786	3080	3158	4263	4424	3806	4007	2981	3872
MSTRG.2099	LOC100166342	venom dipeptidyl peptidase 4-like	5126	4447	2306	1836	2641	4377	3942	2988	1527	3062	5051	3345	2727	1484	2251
MSTRG.15532	LOC100161968	organic cation transporter protein-like	5115	4530	2712	2284	3157	4973	3738	2722	1696	2935	4500	3595	3681	1958	3123
MSTRG.12014	LOC100161628	pre-mRNA-processing factor 6-like	5112	6502	7882	10542	8984	4696	6067	8081	10409	5442	4815	5622	7873	8842	8114
MSTRG.19893	LOC100160847	myeloid leukemia factor-like	5112	6455	7470	9555	9577	4895	6539	7659	8548	5516	5212	5498	8058	6852	7300
MSTRG.16007	LOC100163696	uncharacterized LOC100163696	5109	8270	8316	7195	8513	5277	7640	9084	6826	9005	4968	6667	8436	6658	8452
MSTRG.21032	LOC100162045	armadillo segment polarity protein-like	5107	7165	8865	12185	8873	4974	7238	9524	11337	6531	5131	5912	8733	9151	9658
MSTRG.20291	LOC100159705	ubiquitin-like protein 4A-like	5104	6136	6418	10312	8293	4720	5370	7136	10141	6228	5312	6276	6511	9031	8141
MSTRG.13109	LOC100167974	uncharacterized LOC100167974	5103	5797	3225	3321	4869	5314	4568	3566	3085	3779	5228	4056	3185	2629	4420
MSTRG.20817	LOC100169564	SNW domain-containing protein 1-like	5100	5967	5650	5089	4036	3382	4385	6137	4024	4418	4577	4856	5222	3907	4766
MSTRG.3137	LOC100163393	phenoloxidase subunit A3-like	5099	6298	3446	1357	1085	6677	4642	3307	1517	919	3561	3576	2955	1356	1334
MSTRG.1450	LOC100163972	MACRO domain-containing protein 2-like	5096	5081	3368	3233	4547	4658	3960	3483	2882	4363	4834	3924	3581	3014	4003
MSTRG.17343	LOC100163101	translational activator GCN1-like	5095	6270	7662	11623	7948	4516	6199	8171	11705	3877	4183	5767	5848	9682	8811
MSTRG.20155	LOC100167176	active transporters; solute carrier family 25 member 35, hypothetical protein	5092	6461	2489	2506	1597	4118	3669	3030	2302	834	6800	4149	2707	2690	2335
MSTRG.21168	LOC100168069	nostrin-like	5089	4984	2554	1987	4015	4782	3860	2613	1844	4973	4889	4055	2202	1711	2832
MSTRG.2310	LOC100159480	pterin-4-alpha-carbinolamine dehydratase-like	5087	4270	3470	5040	4966	4091	3879	3343	5813	3124	4909	4432	3011	4809	4495
MSTRG.11645	LOC100160442	lambda-crystallin homolog	5086	5666	3097	3490	2942	4807	4888	3612	3435	2906	5166	4590	2041	3696	3493
MSTRG.5667	LOC100167870	lysophospholipid acyltransferase 1-like	5084	5100	3894	6072	5693	4791	4013	3994	6155	2837	4439	4196	2979	4967	4981
MSTRG.15921	LOC100161023	uncharacterized LOC100161023	5081	6180	7227	11614	9556	4623	5472	7466	12254	6915	4694	5435	6215	11298	8547
MSTRG.17626	LOC100160060	protein gustavus, SPRY domain-containing SOCS box protein 1-like	5080	6905	6753	4723	5500	4588	6089	7269	3540	6267	5176	4421	7009	2719	5328
MSTRG.13926	LOC100167721	gamma-glutamylaminecyclotransferase-like	5079	5773	6422	8938	6833	4390	5054	6757	9599	4297	4782	4715	5939	7843	7537
MSTRG.10275	LOC100162023	histone deacetylase Rpd3-like	5077	6518	8802	8124	6571	4547	6228	8957	8020	4400	4427	5231	8290	6699	7004
MSTRG.10907	LOC100167406	protein white-like	5076	5266	1655	1670	2108	4304	3250	1859	1387	1578	4564	2760	1528	1216	2199
MSTRG.11755	LOC100160162	echinoderm microtubule-associated protein-like 1-like	5074	6428	4144	3026	4233	5989	5341	4681	2711	3067	4823	4202	5039	2277	3483
MSTRG.2841	LOC100160464	kynurenine--oxoglutarate transaminase 3-like	5073	6633	4747	6061	5191	4501	5402	5292	6357	4229	5542	4645	3626	5324	4880
MSTRG.4496	LOC100164432	5'-nucleotidase	5065	3931	1680	1382	2546	4149	2475	2218	1305	2334	4285	2491	1954	1429	2147
MSTRG.17435	LOC100159463	UDP-glucuronosyltransferase 2B28-like	5060	4784	2843	4140	3964	4129	3754	2978	4095	2202	4278	3186	2547	2919	3460
MSTRG.5149	LOC100161335	zinc finger protein 12-like	5059	5682	7149	10276	7063	4257	5147	7899	9439	4796	4226	3515	6346	8020	7687
MSTRG.6839	LOC100168754	uncharacterized LOC100168754	5056	3214	227	241	1464	4238	1171	185	134	436	5231	2618	381	90	412
MSTRG.19742	LOC100167820	serine/threonine-protein kinase GE16371-like	5052	5060	4379	5205	4072	4662	4119	4266	4767	3569	4073	3524	3790	3893	4193
MSTRG.21530	Obp3	odorant-binding protein 3	5051	6366	5195	4998	4791	4287	4946	4843	4373	2864	5181	4648	4224	4226	4874
MSTRG.184	LOC100162169	legumain-like	5046	669	416	161	249	3929	1259	484	282	387	4465	2109	1283	161	189
MSTRG.15372	LOC100161437	e3 ubiquitin-protein ligase MARCH6-like	5045	5429	3565	3794	3947	4697	4521	3685	3192	4418	4856	3626	3842	2988	3664
MSTRG.10766	LOC100162326	DNA-directed RNA polymerase II subunit RPB1-like	5044	7474	6198	5085	4630	4833	6871	7312	4077	4399	5034	5309	7803	3474	5993
MSTRG.10895	LOC100163004	uncharacterized LOC100163004	5035	5928	5306	4694	5447	4295	5012	5184	3820	6409	4203	3672	5475	3126	4948
MSTRG.13443	LOC100165749	probable ATP-dependent RNA helicase DDX31-like	5035	5134	5195	5849	5455	4135	4820	4910	5276	3344	3927	4351	4821	4927	4485
MSTRG.16999	LOC100572769	tubulin glycylase 3A-like	5035	4284	2488	983	1546	5413	3465	2419	1036	1853	3723	3502	2514	1082	967
MSTRG.12858	LOC100575747	uncharacterized LOC100575747	5027	5120	4942	5569	4562	4014	4462	5492	4940	2794	3931	3174	4939	3848	4978
MSTRG.14855	LOC100163240	uncharacterized LOC100163240	5026	8867	5278	5406	3221	4128	5910	5271	4468	2252	4895	4598	2907	4335	3743
MSTRG.10352	LOC103307624	#N/A	5023	5126	4912	6890	6680	4228	4429	5019	7046	4649	4523	4103	4310	6217	6283
MSTRG.1961	LOC100163767	cytosol aminopeptidase-like	5022	5280	4658	5354	4953	4335	4944	4550	5221	3917	4798	4666	5123	4342	4408
MSTRG.6092	LOC100162128	DNA replication licensing factor Mcm6-like	5009	6187	8729	11955	6939	4176	6591	9611	11148	3651	3947	5284	8394	9391	7778
MSTRG.24200	LOC100168868	COP9 signalosome complex subunit 1b-like	5000	5067	5695	7981	5713	4242	4883	5928	8251	2746	4212	4477	4398	6514	5967
MSTRG.20929	Ckiibeta	casein kinase II beta subunit	4988	6218	5770	9535	7894	3864	5109	7004	10239	5492	4993	4632	5455	7776	7417
MSTRG.12458	LOC100163907	uncharacterized LOC100163907	4987	5389	5491	7852	6961	4753	4772	5930	7710	4915	4799	4615	5216	6803	7539
MSTRG.18717	LOC100166510	uncharacterized LOC100166510	4986	8669	5813	7486	6061	4556	6011	6372	7148	4909	4586	4222	4710	6009	7144
MSTRG.20059	LOC100166424	oligopeptidase A-like	4985	5212	4665	6914	6080	4775	4386	5484	7639	3475	4724	4233	3989	5955	6236
MSTRG.6868	LOC100575625	proliferation-associated protein 2G4-like	4984	5832	6544	6432	5659	3964	5851	6773	6252	2939	4353	5026	5628	4508	5248
MSTRG.9963	LOC100166802	transducin beta-like protein 3-like	4978	5210	5310	7798	5481	4227	5255	5548	7448	3235	4212	4458	4671	6098	5294
MSTRG.20309	Tceb2	transcription elongation factor B polypeptide 2	4973	4482	7348	12723	9343	4330	3996	7737	13331	6344	3182	6328	3669	10748	6549
MSTRG.8235	LOC100167327	NAD-dependent deacetylase sirtuin-1-like	4973	5198	4450	6568	4566	4211	3770	4865	5582	3844	3823	3040	3366	4194	4997
MSTRG.10711	Catb-2744	cathepsin B-2744 (EC:3.4.22.1)	4965	1420	1541	1096	551	3703	3565	1852	1042	1462	6058	4461	3310	801	643
MSTRG.2387	LOC100165068	zinc transporter 7-like	4961	4457	3334	1884	3356	4106	4034	3440	1798	1945	4727	4094	3602	1424	2811
MSTRG.12028	LOC100159633	cytoplasmic dynein 1 intermediate chain-like	4959	6033	7205	11217	8746	4540	5445	7788	11252	5597	4629	5276	6186	9341	9013
MSTRG.16758	Elongin-c1	elongin C-like	4947	5130	4547	6060	5808	4414	4654	4621	8099	3780	4780	4104	6037	4703	5040
MSTRG.12787	LOC100165570	peroxisomal N(1)-acetyl-spermine/spermidine oxidase-like	4940	4661	2502	3373	2424	4340	3776	2875	3235	1303	4369	3740	2253	2927	2369
MSTRG.16511	LOC100165966	60S ribosomal protein L38-like	4939	6263	6369	10255	8431	4001	5298	6926	10640	4633	4767	6501	5461	9829	8286
MSTRG.16145	LOC100162051	very long-chain specific acyl-CoA dehydrogenase, mitochondrial-like	4938	5618	3542	5204	5836	4561	4445	3827	4996	7437	4373	3076	3423	4399	4962
MSTRG.16378	Catb-5880	cathepsin B-5880	4937	499	859	555	313	3452	1780	683	1156	607	4731	3207	1687	391	667
MSTRG.10675	LOC100165978	DNA damage-binding protein 1-like	4936	4725	6345	8586	5968	4244	5085	6849	8297	3282	3650	3860	6073	6139	6616
MSTRG.20094	LOC100161721	uncharacterized LOC100161721	4926	4187	2785	1784	3467	4366	4519	3196	1470	7467	5065	3690	2396	1786	2288
MSTRG.9702	LOC100161993	splicing factor 3B subunit 1-like	4920	5689	6378	6348	5779	4452	5452	7037	4593	4440	4486	4644	6531	4862	5524
MSTRG.17937	LOC100161944	Y+L amino acid transporter 2-like, amino acid transporter; AA transmembrane transporter	4919	6345	5232	4503	4143	4637	5074	5211	4425	4031	4530	4975	4847	3832	4304
MSTRG.10328	LOC100159456	tripeptidyl-peptidase 2-like	4917	6451	7206	10593	7767	4936	6482	7837	10199	4341	4644	5209	6814	8666	7835
MSTRG.628	Ccdc25	coiled-coil domain containing 25	4915	4600	5081	6416	5457	3490	4337	5453	5323	3512	4283	5377	4916	4783	4623
MSTRG.13584	LOC100166710	AP-1 complex subunit sigma-2-like	4912	5471	6519	7986	6951	4833	5828	5863	7936	5344	5082	6727	5153	7377	7377
MSTRG.12743	LOC100165953	akirin-like	4910	6950	6417	7544	6238	4557	6060	7165	6578	5260	4541	4548	6359	5616	6558
MSTRG.16379	Catb-10270	cathepsin B-10270	4910	772	1262	1125	447	5119	2642	1034	1275	334	4911	3481	3153	1007	933
MSTRG.9856	LOC100163637	uncharacterized LOC100163637	4907	5781	4392	6964	5211	5012	4416	4915	6614	3804	3913	3636	3839	4765	5869
MSTRG.11783	LOC100168963	transmembrane emp24 domain-containing protein 6-like	4906	5174	3561	3942	4628	4556	4290	3655	3886	2773	4826	4706	3477	3349	3745
MSTRG.13314	LOC100159897	UDP-glucuronosyltransferase 2B2-like	4900	3540	2188	1723	1274	6976	3254	2065	2108	1680	5219	3447	1878	1884	1747
MSTRG.7064	LOC100160906	uncharacterized LOC100160906	4896	1752	260	263	186	4711	1222	353	208	48	5400	2720	345	201	34
MSTRG.18381	LOC100166758	zinc finger protein 502-like	4896	4449	3020	3241	3140	3829	3615	3140	3088	2701	4487	3354	3079	2656	3059
MSTRG.9977	LOC100159782	splicing factor U2AF 50 kDa subunit-like	4893	5901	7889	10643	9183	4354	5781	8191	10421	5457	4384	5436	6860	8560	7993
MSTRG.9192	LOC100169483	afadin-like	4888	6254	5489	4587	5378	4387	5359	5896	4227	4330	4464	4520	5727	3665	4988
MSTRG.11428	LOC100161916	poly(A) RNA polymerase gld-2 homolog A-like	4883	2155	679	510	764	3935	1394	617	510	558	2971	1721	530	427	631
MSTRG.14045	LOC100163091	nicotinate phosphoribosyltransferase-like	4881	3534	2339	3571	2729	4452	2988	2772	3406	2249	3686	2324	2295	2863	2825
MSTRG.17583	LOC100164217	putative inorganic phosphate cotransporter-like	4877	1654	731	907	404	4296	2164	980	1049	387	4696	2218	1349	581	499
MSTRG.9616	LOC100168064	uncharacterized LOC100168064	4875	5819	7871	12588	9624	4146	5510	8035	12863	6348	4642	6392	7007	11534	9514
MSTRG.22033	LOC100165385	uncharacterized LOC100165385	4871	6052	5154	7843	6894	4415	4673	5344	7651	5773	5123	4887	5112	7217	6739
MSTRG.9021	LOC100165304	kelch domain-containing protein 4-like	4866	4593	5073	7635	6377	3928	4431	5270	7910	3435	4439	5287	4407	6598	6154
MSTRG.20622	LOC100165008	probable S-adenosyl-L-methionine-dependent methyltransferase CG14683-like	4865	5253	3911	3826	4179	4665	4272	4005	3503	3017	4727	4500	4322	3121	3723
MSTRG.8037	LOC100168511	uncharacterized LOC100168511	4864	6350	8433	12612	7271	3733	5273	9142	11683	3668	3977	5183	7066	9759	8031
MSTRG.1866	LOC100167269	piwi-like protein 2-like	4862	4153	2929	4722	3330	4157	3016	3249	4543	2502	3341	2971	2639	3845	4033
MSTRG.4587	LOC100160746	WD repeat-containing protein 3-like	4861	5114	5864	6668	4530	4044	5017	5940	6492	2402	4020	4510	5325	4958	4564
MSTRG.11614	LOC100165361	uncharacterized LOC100165361	4860	5202	5761	9516	8157	3984	5364	6443	10826	3465	4260	5940	5341	8627	7478
MSTRG.20144	LOC100159008	protein shuttle craft-like	4855	4855	5000	6772	5356	4069	4435	5098	6191	5432	4148	3526	5669	5076	5368
MSTRG.14193	LOC100161111	DNA replication licensing factor mcm7-like	4854	7821	12205	14584	8061	4098	8187	13295	13427	4539	4431	6190	11903	11111	9380
MSTRG.7338	LOC100169206	raf homolog serine/threonine-protein kinase phl-like	4854	4929	5446	6341	5800	4628	5158	5871	5797	2479	4504	4074	5795	4904	5339
MSTRG.19247	LOC100166885	protein FAM188A-like	4853	4170	6174	8697	6213	4627	4035	6544	8736	3497	4359	4904	5330	4090	4324
MSTRG.10765	LOC100168334	uncharacterized LOC100168334	4850	5886	4810	6295	5771	5354	4957	5125	6416	4260	5133	4926	4410	6367	6173
MSTRG.19901	LOC100165546	sister chromatid cohesion protein PDS5 homolog B-B-like	4847	6549	8639	12343	7433	4338	6080	9684	11517	4716	3988	4614	6777	9140	9197
MSTRG.9401	LOC100165783	uncharacterized LOC100165783	4847	7700	6751	5141	6476	4827	6340	7483	3890	6601	5283	4108	6766	3076	6308
MSTRG.901	LOC100163919	#N/A	4846	5193	2588	1765	1545	4763	4335	2746	321	1723	4140	3964	1659	2058	2292
MSTRG.9865	LOC100166064	uncharacterized protein C19orf29 homolog	4834	5177	6064	10313	8410	4443	5245	6867	10809	5296	4439	5283	5512	9785	8084
MSTRG.17153	LOC100164854	116 kDa U5 small nuclear ribonucleoprotein component-like	4828	7344	9931	13798	8963	4278	7600	11088	13173	4017	4564	6430	9784	10382	9624
MSTRG.13844	LOC100159654	tubulin beta-3 chain-like	4825	6809	7927	6663	14295	4799	6497	8045	5902	6406	4533	6500	9896	4913	9823
MSTRG.19	ND5	NADH dehydrogenase subunit 5	4824	3775	2779	4036	3324	4561	3680	2539	4145	2948	4955	6225	4791	3486	2047
MSTRG.17986	LOC103308996	#N/A	4819	5136	2106	2341	1458	5853	3749	1578	2111	1720	3657	3520	1551	2301	1581
MSTRG.17722	LOC100570404	mitochondrial import inner membrane translocase subunit Tim13-like	4817	5050	4363	5888	5322	3742	4471	4314	6883	3320	4560	4453	3580	5556	5397
MSTRG.13811	LOC100162374	ubiquitin-protein ligase E3A-like	4813	6503	4679	5752	5383	4888	5154	5369	5351	5557	4564	3535	4746	4500	5667
MSTRG.7903	Hibadh	#N/A	4809	3434	1067	631	1196	4058	2303	1354	476	2138	4371	2227	1004	533	828
MSTRG.19069	LOC100161540	alanyl-tRNA synthetase, cytoplasmic-like	4809	5295	5350	6696	4864	4597	5052	5568	6130	2528	3965	4249	4866	5094	5372
MSTRG.15901	ACYPI53008	#N/A	4808	4001	3139	2252	3242	4111	3356	2840	2181	2053	4501	4142	3318	1856	2620
MSTRG.13852	LOC100160408	derlin-1-like	4807	5272	5159	8280	8123	4504	4659	5491	8819	5129	4865	4826	4660	8174	7479
MSTRG.17000	LOC100167777	cytochrome P450 4C1-like	4805	4048	2468	1404	331	4808	3686	1482	1778	102	2944	3938	1881	1575	239
MSTRG.17979	LOC100163339	glutaryl-Coenzyme A dehydrogenase-like	4804	4875	2513	1388	2246	4649	3558	2649	1043	3096	5150	3845	3544	1156	2186
MSTRG.6381	Mago	mago nashi	4798	7602	10063	15372	10959	4080	7172	11090	16440	4799	5100	6588	9282	13060	11543
MSTRG.551	LOC100163622	inositol 1,4,5-trisphosphate receptor-like	4793	8155	4163	2441	3255	4794	5966	5006	2384	2968	5419	4273	3113	2045	3292
MSTRG.9654	LOC100164095	fatty acid 2-hydroxylase-like	4790	4573	2333	2048	2219	4166	3694	3120	1814	1765	4370	3037	2770	1373	2341
MSTRG.22019	LOC100166736	uncharacterized LOC100166736	4786	5692	5129	5601	5980	4513	4751	5055	4985	5197	4446	4606	4347	4647	5561
MSTRG.20220	LOC100161108	uncharacterized LOC100161108	4781	5634	7304	11960	8797	5267	5027	7768	9767	7270	4250	3667	7212	7852	9605
MSTRG.6424	LOC100158988	superkiller viralicidic activity 2-like 2-like	4771	5390	6272	9294	6609	4151	5465	7053	8867	3496	3749	4683	5721	7329	6951
MSTRG.4893	LOC100575426	probable 39S ribosomal protein L24, mitochondrial-like	4770	3921	3208	4632	4164	3849	3699	3518	5162	2431	4233	3929	2774	4502	4725
MSTRG.3035	LOC100164077	cationic amino acid transporter 2, amino acid transporter, cationic AA transmembrane	4768	2592	1496	991	1124	3663	2569	1506	975	947	4037	2703	1352	813	1239
MSTRG.135	LOC100168167	uncharacterized LOC100168167	4751	3915	1642	879	359	3582	2560	1361	647	291	4009	2845	2045	859	579
MSTRG.10694	LOC100168628	uncharacterized LOC100168628	4751	5344	3746	6163	5636	4004	3859	4185	6151	6014	4643	3751	3048	5474	5178
MSTRG.11628	LOC100570083	uncharacterized LOC100570083	4750	9557	13068	27476	12602	4372	8165	15977	27802	7265	5361	9927	8457	25129	16049
MSTRG.11621	LOC100166599	uncharacterized LOC100166599	4749	4951	5603	9399	8047	4523	4619	6040	9110	8186	3735	3016	4561	8138	7774
MSTRG.19348	LOC100161792	elongation of very long chain fatty acids protein AAEL008004-like	4747	4290	2897	1523	1443	4981	4449	3338	1395	2290	6944	3444	3202	1144	2152
MSTRG.20414	LOC100167188	mesencephalic astrocyte-derived neurotrophic factor homolog	4740	5659	4921	9781	8743	4364	5083	5593	10267	3424	4804	5300	3842	9192	9154
MSTRG.5583	LOC100164305	acylamino-acid-releasing enzyme-like	4738	5517	4165	5765	4710	4060	3973	4731	5817	2844	4033	3580	3433	4887	4443
MSTRG.7678	LOC100167674	NSFL1 cofactor p47-like	4737	5326	5881	7434	6241	4204	5562	6223	6629	3400	3691	4539	5735	5606	5588
MSTRG.16097	LOC100164759	uncharacterized LOC100164759	4737	5503	4956	7911	6587	4267	5322	5662	6774	6874	4026	4489	4885	7144	6429
MSTRG.18479	LOC100168769	#N/A	4732	4814	4993	8996	8282	4811	4284	5385	9176	5871	4014	4247	4547	7740	7774
MSTRG.9194	Edf1	endothelial differentiation-related factor 1	4729	6078	5790	9574	7542	4540	5462	6350	10274	4464	4901	5587	5920	8865	8307
MSTRG.18073	LOC100163744	telomere length regulation protein TEL2 homolog	4725	5050	3974	7104	5914	4227	4277	4324	6720	4393	4219	4411	3304	6144	5749
MSTRG.5580	LOC100161367	ubiquitin-conjugating enzyme E2 C-like	4724	6487	8088	11348	7484	4160	5514	8426	11953	3686	4436	5987	6242	10166	7999
MSTRG.15141	LOC100167639	uncharacterized LOC100167639	4724	4186	2030	2452	3681	3815	3709	2664	2429	2291	4294	2896	1435	1839	3228
MSTRG.7258	LOC100167104	bromodomain-containing protein 7-like	4721	6265	8506	14318	11294	4188	5819	9037	14197	7724	4612	5733	7681	12766	11300
MSTRG.4562	LOC100168014	hsp70-binding protein 1-like	4714	5126	4182	3646	3771	4746	4797	4497	3124	3629	4996	4320	4914	2826	3896
MSTRG.2183	LOC100168376	cyclin-dependent kinase 12-like	4713	5347	5238	6264	5568	4339	4791	5613	5800	3741	3570	3851	4667	4575	4577
MSTRG.20003	LOC100161178	L-threonine aldolase 2	4711	2868	1824	1841	2219	4608	2411	1891	1622	921	4930	2608	1907	1492	1976
MSTRG.4804	LOC100574069	uncharacterized LOC100574069	4709	5747	2982	2852	3656	4473	4855	4827	2401	3246	4899	3306	2405	2063	3128
MSTRG.22773	LOC100167709	40S ribosomal protein S28-like	4707	5144	3885	2722	3450	3881	4201	3699	2481	2890	1615	4714	3899	2408	2731
MSTRG.11800	LOC100168949	cytochrome c heme lyase	4700	4399	4245	5581	5103	4237	3973	4575	5286	2906	4250	3647	3759	4266	4436
MSTRG.12956	LOC100163178	esterase ybfF-like	4692	2811	1676	2062	1962	4058	1706	1834	2190	2695	4025	2443	1431	1794	1628
MSTRG.18061	LOC100574004	protein BCCIP homolog	4692	5251	5394	6410	5730	3756	4872	5869	6184	3035	4276	5033	5348	5289	5449
MSTRG.9673	LOC100162950	longitudinals lacking protein-like	4690	7679	7535	9151	8348	4860	6586	7258	8079	5519	5392	5841	7351	7161	7606
MSTRG.8800	LOC100159176	splicing factor 3A subunit 2-like	4687	5302	5898	6636	5937	4004	5039	5992	5667	3992	4360	5211	6747	4784	5148
MSTRG.5458	LOC100159626	electron transfer flavoprotein-ubiquinone oxidoreductase, mitochondrial-like	4687	5146	2714	2759	4248	4524	3901	2881	3020	4912	4179	3322	2638	2092	3360
MSTRG.11944	LOC100161165	SUMO-activating enzyme subunit 1-like	4684	7004	8139	11909	8146	4057	6436	9315	11808	4505	4457	6013	7261	10046	8498
MSTRG.25167	LOC100574719	probable cytochrome P450 6a14-like	4682	1245	1353	726	543	10149	1093	1034	1695	1604	5998	1974	1843	1042	1028
MSTRG.20628	LOC100159483	rac GTPase-activating protein 1-like	4682	5600	6218	7646	5306	4527	5443	6842	7290	3345	3887	3585	5859	5701	6040
MSTRG.18878	LOC100163623	protein scribble homolog	4681	6241	5925	6879	7061	4610	5519	6436	6283	6895	4417	4364	6490	5341	6673
MSTRG.15892	LOC100167560	protein LTV1 homolog	4678	5400	5447	8378	6948	4127	4828	5620	8470	4829	4334	5552	5245	7589	6993
MSTRG.16001	LOC100165291	6-phosphogluconolactonase	4678	5570	4805	7050	5934	4250	4389	5313	7146	3804	4867	4971	4450	5977	5937
MSTRG.9018	LOC100163224	uncharacterized LOC100163224	4677	4636	4263	8319	5970	4441	4312	5514	6725	3874	4507	3613	4217	7039	7091
MSTRG.16559	LOC100168494	SAP domain-containing ribonucleoprotein-like	4670	6344	7949	11523	9326	4123	6251	8280	11476	5152	4539	6002	7120	10037	8981
MSTRG.10994	LOC100162183	meiotically up-regulated gene 71 protein-like	4668	6059	6589	11918	8906	4129	4996	6819	11111	5083	3939	4657	4554	10265	8756
MSTRG.7685	LOC100162932	uroporphyrinogen decarboxylase-like	4668	4908	3817	2255	3542	3989	3792	3491	4687	2586	4178	1993	3233	2214	3303
MSTRG.11371	LOC100574986	uncharacterized LOC100574986	4666	6934	7329	12744	10740	4762	5965	7851	12508	8109	4578	5363	6702	11209	9777
MSTRG.17582	LOC100166803	transmembrane GTPase Marf-like	4665	4930	4065	3981	4538	3432	3152	4372	3833	2330	3917	3415	2773	3015	4378
MSTRG.20351	LOC100158734	nucleolar protein 14-like	4649	4848	4989	7924	5388	3374	4365	5499	7890	3367	3555	4596	4334	7368	5613
MSTRG.8649	LOC103309954	#N/A	4649	4098	4184	6664	6390	3782	3827	4222	6863	3566	3999	3685	3490	5595	6107
MSTRG.11266	LOC100166015	defense protein l(2)34Fc-like	4646	3144	933	453	864	3883	2406	1215	410	240	4466	2184	673	343	577
MSTRG.2490	LOC100164061	#N/A	4646	5428	4040	3510	4130	4407	5011	4280	3047	2437	4713	5085	4457	2329	3574
MSTRG.20760	LOC100164702	transcription factor 25-like	4645	5120	5073	7261	6014	4293	4323	5170	6936	4234	4238	4331	5053	6057	5681
MSTRG.10236	LOC100169488	ATP-binding cassette sub-family F member 3-like	4641	4809	6304	8200	6008	4118	4793	6190	7722	3551	3624	4234	5707	6207	6488
MSTRG.8169	LOC100160798	uncharacterized LOC100160798	4638	6814	8387	13750	9258	4717	6551	9122	12612	4924	4224	4980	6738	10238	9274
MSTRG.5949	LOC100166779	protein crooked neck-like	4636	5358	5925	8317	6172	3653	5276	6886	7758	3862	4020	4679	6351	7295	6354
MSTRG.13920	LOC100159273	zinc finger protein 706-like	4627	6451	5852	4715	6166	3757	5696	5880	4272	5192	5250	5875	6470	3525	4781
MSTRG.18573	LOC100162436	embryonic polarity protein dorsal-like	4622	5427	3262	3535	2539	3345	3533	2987	3471	2525	3230	2643	2452	2859	2727
MSTRG.6246	LOC100159795	protein phosphatase 1 regulatory subunit 3B-like	4619	10889	3523	2250	1787	4473	6329	5683	1568	1399	4457	3956	2509	1978	2851
MSTRG.4949	LOC100164940	proton-coupled folate transporter-like	4614	4628	2178	2294	1524	3971	3208	2149	2083	1016	3739	3273	1741	2246	1720
MSTRG.1979	LOC100168619	NFX1-type zinc finger-containing protein 1	4608	5257	5283	9482	7166	4592	4706	6093	8510	5597	4486	4375	4541	8203	7395
MSTRG.12911	LOC100167475	4-coumarate--CoA ligase 3	4607	3334	1456	2037	2281	4579	2893	1861	1893	3819	3856	2462	1791	1625	2056
MSTRG.11359	LOC100166921	esterase FE4-like	4604	9674	1232	451	355	4543	4445	1459	285	58	3601	2785	506	306	446
MSTRG.21061	LOC100160345	ubiquinone biosynthesis protein COQ9, mitochondrial-like	4600	4585	3005	2291	3097	4266	3635	2894	2175	2356	4670	3738	3287	1994	2543
MSTRG.18742	LOC100168370	possible pseudogene or miscRNA, No KEGG entry	4596	6230	8921	11945	8395	4115	6318	9727	11520	5001	4232	5072	8318	9994	9238
MSTRG.12953	LOC100159306	transcriptional regulator ATRX homolog	4594	6510	7441	14105	9525	4203	5699	8600	14978	5378	4270	6073	4966	13667	10419
MSTRG.13459	LOC100573220	cytochrome b-c1 complex subunit 9-like	4587	4465	3069	4333	4097	3829	3570	3353	4640	3757	4425	3933	2604	4440	3874
MSTRG.21785	LOC103308188	#N/A	4585	5023	4532	4966	4008	3706	4485	4510	4727	3269	3774	4363	4438	4348	4010
MSTRG.3359	LOC100167468	putative serine protease K12H4.7-like	4579	527	524	567	217	2503	1600	802	1196	166	3352	2526	1127	533	522
MSTRG.5414	LOC100166649	dynamin-1-like protein-like	4573	3096	872	1394	1332	2505	1987	1040	1191	757	3040	2000	828	646	1310
MSTRG.18225	LOC100166869	elongation factor G, mitochondrial-like	4572	3893	3272	4464	3686	3965	3629	3404	4729	1869	3623	3179	3119	3609	3699
MSTRG.8841	LOC100161594	short-chain specific acyl-CoA dehydrogenase, mitochondrial-like	4568	3868	1544	797	1090	4567	2843	1729	804	1572	3857	2635	1642	935	990
MSTRG.11895	LOC100168240	receptor expression-enhancing protein 5-like	4568	4621	3136	6285	5153	3602	3965	3900	6899	2891	4031	3855	2781	5685	5435
MSTRG.9210	LOC100575791	uncharacterized LOC100575791	4563	6374	6181	7088	6715	3925	5650	6751	6663	4304	4670	6031	6403	6088	6144
MSTRG.9840	LOC100160790	probable ribosome biogenesis protein RLP24-like	4556	5074	4126	4136	5394	4015	3798	4013	3983	3474	4384	4652	3876	3487	4121
MSTRG.17455	LOC100165780	UMP-CMP kinase	4548	2237	2758	4501	2768	3938	2112	3005	3083	1915	4630	3375	1745	4423	2480
MSTRG.7616	LOC100158735	uncharacterized LOC100158735	4548	4924	4754	6516	4934	3903	4153	5352	5639	3724	3820	3540	4522	5132	5316
MSTRG.5923	LOC100162642	possible pseudogene or miscRNA, No KEGG entry	4547	5582	5232	7152	5859	4183	5197	5693	6617	4451	3840	3535	5254	5529	6663
MSTRG.20317	LOC100169001	ubiquitin-conjugating enzyme E2 H-like	4543	5660	3937	6560	5825	4116	3937	3983	6910	5155	3725	3370	3469	5600	6540
MSTRG.1600	LOC100164619	uncharacterized LOC100164619	4541	5290	4599	7165	9128	4546	4269	5363	6592	6552	4528	4137	4469	8401	6736
MSTRG.9258	LOC100160159	protein polybromo-1-like	4541	6508	8757	13730	9532	3925	6000	10113	12348	7251	3756	4329	8553	10976	10017
MSTRG.13528	LOC100159218	ferredoxin-like	4540	3467	3002	3214	3524	3985	3136	2854	3272	2140	3481	3448	2900	2834	2822
MSTRG.16217	LOC100168700	serine/threonine-protein kinase polo-like	4540	7421	11672	13442	7388	4262	7738	12785	11856	4257	4251	6127	10350	10285	9713
MSTRG.7778	LOC100161681	squamous cell carcinoma antigen recognized by T-cells 3-like	4538	5611	6978	10177	7722	3609	5431	7217	10202	5054	3988	4924	6203	8918	8357
MSTRG.24586	LOC100167750	muscular protein 20-like	4535	2531	736	350	769	3779	1412	622	311	865	5025	1984	385	361	650
MSTRG.20830	LOC100161171	RNA polymerase II-associated factor 1 homolog	4531	3836	4147	5613	4135	2578	2931	4378	5557	3227	3897	2689	3516	6922	6827
MSTRG.9474	LOC100160109	probable ATP-dependent RNA helicase DDX10-like	4530	4673	4872	6492	5353	3838	4233	4964	6866	3483	3917	4571	5055	6273	5596
MSTRG.7380	LOC100161525	protein VPRBP-like	4529	4863	5106	7369	5539	3747	4542	5992	6940	3661	3523	3843	4500	6140	5318
MSTRG.10419	LOC100162508	ribosomal protein S6 kinase beta-1-like	4520	4381	3552	4812	4367	4128	3806	3805	4419	2424	4032	2979	2685	3581	4246
MSTRG.20254	LOC100159469	protein strawberry notch-like	4520	4624	5889	6589	5969	3739	4797	6225	6184	3764	3413	3160	5739	4868	6052
MSTRG.21573	LOC100162809	phosphatidylinositol transfer protein alpha isoform-like	4517	3533	2549	4947	4155	3401	2936	3713	4940	1879	3314	2915	2877	3116	4154
MSTRG.19408	LOC100575164	angiotensin-converting enzyme-like	4515	1742	219	115	508	3878	901	353	96	84	5194	1708	307	73	223
MSTRG.11384	LOC100162800	aldehyde dehydrogenase X, mitochondrial-like	4515	4197	3336	4182	3235	3759	4363	3785	4813	2036	4778	4110	3783	4122	3051
MSTRG.10581	LOC100169528	FAS-associated factor 1-like	4510	5090	5305	5461	4899	4196	4642	5259	4737	4431	3794	3845	4934	4278	4737
MSTRG.6384	LOC100168129	histone-lysine N-methyltransferase, H3 lysine-79 specific-like	4509	6574	5950	8199	8139	4297	5331	6101	6602	10022	4681	4955	5708	7200	7190
MSTRG.9610	ACYPI46564	#N/A	4508	4235	2886	3727	3780	3701	3317	3130	3611	3015	3940	3293	2757	3183	3305
MSTRG.24444	ACYPI45001	#N/A	4507	2207	303	124	340	4210	999	339	92	59	6752	2058	280	145	122
MSTRG.7421	LOC100160884	profilin-like	4507	6019	4062	5006	4885	4588	4884	4151	4818	2978	4958	3766	4034	3952	4809
MSTRG.5102	LOC100166266	protein argonaute-2-like	4505	5900	5392	6957	6145	4296	5139	5807	6186	5022	4081	3950	5414	4971	6443
MSTRG.18880	LOC100166719	scavenger receptor class B member 1-like	4502	5866	5123	5395	4844	4115	5938	5661	4604	5842	5216	3589	3441	4293	4884
MSTRG.16036	LOC100160547	heterogeneous nuclear ribonucleoprotein L-like	4501	4893	4048	4837	5130	4610	4101	4443	4559	3977	4346	3715	4014	3996	4839
MSTRG.13562	LOC100167991	zinc transporter 2-like	4500	3291	2140	1627	2157	3634	2513	2247	1660	1537	3585	2302	2352	1313	2118
MSTRG.10074	LOC100164015	e3 ubiquitin-protein ligase HECW2-like	4500	4544	4590	7893	6269	3906	4288	5031	6946	4111	3717	3278	4486	5810	6168
MSTRG.11518	LOC100160314	U3 small nucleolar RNA-associated protein, putative	4498	5631	5878	7870	5951	4258	5312	5839	8183	3528	4205	5006	5101	7213	6282
MSTRG.12970	LOC100166030	small nuclear ribonucleoprotein-associated protein B-like	4497	6117	7921	9536	7101	3993	6346	8210	8165	3228	4219	5194	7820	6300	7164
MSTRG.7499	LOC100163876	xylulose kinase-like	4494	4506	1864	1033	1724	4770	3349	2400	858	2050	4510	3186	2561	1148	1438
MSTRG.21596	LOC100167666	growth arrest-specific protein 2-like	4481	5693	1306	722	1057	3718	3099	1821	580	2529	4026	2855	996	799	1151
MSTRG.10758	LOC100169546	transmembrane emp24 domain-containing protein eca-like	4478	4768	4413	10014	7284	4037	5059	4662	10366	4841	4129	5700	5102	7003	9312
MSTRG.14520	LOC100160556	uncharacterized LOC100160556	4471	5166	4309	7077	5319	3776	4268	4974	6929	2673	3642	3833	3062	5499	6242
MSTRG.9395	#N/A	#N/A	4469	4428	4855	5668	7259	3305	3627	4691	6628	6679	5570	5560	8213	7246	5037
MSTRG.21726	LOC100160514	lipoyl synthase 1, mitochondrial-like	4467	4588	2776	3772	3686	4483	3569	2827	3960	3122	4407	3409	2210	3681	3629
MSTRG.9675	LOC100165189	replication protein A 70 kDa DNA-binding subunit-like	4464	5887	8064	10220	6075	3863	6286	8783	9255	2831	3686	4453	7678	7803	6998
MSTRG.6998	LOC100169261	UDP-glucuronosyltransferase 1-9-like	4464	5995	1596	769	1057	3970	3439	2271	472	1557	4894	3000	1166	682	1034
MSTRG.8210	LOC100161046	pecanex-like protein 1-like	4464	4896	4227	6802	5219	4065	4651	4812	6350	4222	3659	4043	3883	4836	5252
MSTRG.16576	LOC100168090	probable peroxisomal acyl-coenzyme A oxidase 1-like	4461	3657	2824	2645	1351	4542	4565	1995	2790	1032	2669	3486	2605	2376	1252
MSTRG.13925	LOC100572651	androgen-induced gene 1 protein-like	4460	4980	3089	4804	3762	4822	4062	3501	4357	2115	4034	3721	2123	3846	4392
MSTRG.1082	LOC100573844	protein BTG2-like	4453	5618	4346	4563	6113	3900	4557	5179	3898	11220	4015	4285	4956	4040	5344
MSTRG.8018	LOC100159522	protein peanut-like	4450	5846	5945	9895	7206	4432	5139	6647	11064	6212	4075	4363	4903	9491	7945
MSTRG.13561	LOC100168705	uncharacterized LOC100168705	4447	4947	2748	2462	3476	4252	3353	2884	2003	4381	4251	2473	3765	2630	3247
MSTRG.17169	LOC100161737	uncharacterized LOC100161737	4440	4486	3454	5583	4590	3863	3437	3863	5772	2953	3608	3483	3072	4581	4805
MSTRG.7736	Pdcd5	programmed cell death 5	4435	5172	5863	7704	6865	3553	4761	6560	6974	4726	4189	4788	5515	6655	6679
MSTRG.6611	LOC100168850	glutathione S-transferase-like	4419	5710	9572	18809	13336	4896	6468	10313	19394	7589	4911	5193	8962	16989	16672
MSTRG.8021	LOC100160855	ubiquitin-like modifier-activating enzyme 5-like	4419	4869	4865	6838	4923	3879	4712	5298	6101	3132	3685	3843	4414	5489	4726
MSTRG.8525	LOC100159696	ATPase family AAA domain-containing protein 2B-like	4417	5816	6431	10989	7159	3875	5851	7804	9537	5004	4062	4803	5889	9002	7984
MSTRG.16910	LOC100575815	uncharacterized LOC100575815	4415	5942	1901	1489	2281	3813	3217	2208	1096	3298	4471	3124	1714	1469	2042
MSTRG.19962	LOC100164049	laccase-5-like	4414	4194	1285	325	1310	5222	2381	1343	462	559	3463	2422	1079	378	1662
MSTRG.2826	LOC100158783	uncharacterized LOC100158783	4413	3933	2830	1848	4742	3485	3294	2875	2126	1749	3065	1784	2488	1834	4151
MSTRG.12155	LOC100159391	programmed cell death 6-interacting protein-like	4412	5161	5660	7261	4882	4107	4823	5502	6324	3813	4162	3562	5645	5502	5217
MSTRG.16881	LOC100165668	ran-binding protein 3-like	4409	5060	5537	8621	6704	3873	4877	6048	8558	4323	4321	4505	5098	6950	6854
MSTRG.7827	Cp28	cuticular protein 28	4407	3153	1774	275	6872	3465	5618	2211	383	11607	14568	3501	2778	321	4392
MSTRG.9237	LOC100162541	uridine 5'-monophosphate synthase-like	4403	4046	5361	4780	3989	4274	3811	3816	4711	2180	5944	4264	2802	4153	4476
MSTRG.12149	LOC100160848	signal peptidase 25 kDA subunit-like	4401	4127	3873	6685	6622	3981	3570	4293	6589	2980	4139	3823	3348	5754	6336
MSTRG.10754	LOC100159304	DDRGK domain-containing protein 1-like	4401	4843	4238	8501	7189	3657	4411	5044	9022	4335	4607	4618	4245	7749	7181
MSTRG.11827	LOC100162025	uncharacterized LOC100162025	4393	10975	11220	4594	7043	4723	9684	11280	3730	5723	4907	6341	11672	2678	6875
MSTRG.21008	LOC100163130	protein RRP5 homolog	4392	7857	7274	11109	7039	4276	6117	8567	11313	4643	4480	6727	6007	9418	7932
MSTRG.19519	LOC100169257	putative sodium-dependent multivitamin transporter-like, Organic acid transporter; similar to sodium/solute symporter	4391	4530	3326	3769	2655	4049	4640	3532	3685	1139	3768	3618	1775	2832	3092
MSTRG.21447	LOC100160744	dimethyladenosine transferase 1, mitochondrial-like	4389	4514	2855	2532	2701	3689	3699	2737	2297	2011	3437	3107	3176	1920	2538
MSTRG.17188	Coq7	ubiquinone biosynthesis protein COQ7 homolog	4371	4530	3215	3955	4185	4828	3997	2846	3525	2944	4359	3791	2992	3056	3713
MSTRG.13602	LOC100164837	alcohol dehydrogenase class-3-like	4368	5033	4765	5955	4657	3534	4577	4896	5609	2420	4011	3977	4609	4799	3961
MSTRG.19074	LOC100163251	WW domain-binding protein 2-like	4365	5190	3078	2323	3215	4423	3984	3336	2205	3801	4696	3357	3468	1779	3384
MSTRG.20223	Yod1	YOD1 OTU deubiquinating enzyme 1 homolog (EC:3.4.19.12)	4363	5037	5115	7646	6131	3758	4447	5474	8318	3280	4267	4384	4854	6622	7155
MSTRG.20933	LOC100168696	dnaJ homolog subfamily C member 16-like	4362	3934	4005	6233	6665	3811	3362	4176	5943	3290	3695	3253	3549	4524	5129
MSTRG.577	LOC100165431	estradiol 17-beta-dehydrogenase 12-B-like	4360	3580	2647	1701	729	4942	3749	1501	2148	583	3058	3298	2871	1690	569
MSTRG.1236	LOC100166184	solute carrier family 23 member 1-like	4355	1439	535	405	415	3413	1591	563	593	430	4230	2114	1215	350	420
MSTRG.18694	LOC100162923	anamorsin homolog	4352	4725	3466	2959	3177	3702	4046	3699	2632	3558	4205	4066	4320	2472	3473
MSTRG.2708	LOC100166242	actin-related protein 2-like	4352	4652	4239	6268	5020	3943	4169	4649	5856	2894	3811	3477	4241	4752	5226
MSTRG.25148	LOC100162496	eukaryotic translation initiation factor 3 subunit D-like	4351	5043	4956	5260	4035	3546	4911	5553	5083	2146	3813	4011	4894	4191	3902
MSTRG.10351	LOC100160543	cyclin-dependent kinase 11B-like	4350	4893	5965	8053	6012	3214	3733	6037	7141	4432	3884	4513	5375	6776	5732
MSTRG.6901	LOC100164792	uncharacterized LOC100164792	4348	2971	1046	703	722	3682	2169	1295	596	903	4067	2670	1651	575	959
MSTRG.12673	LOC100160947	uncharacterized LOC100160947	4343	10128	10093	2603	1805	6186	26535	12690	1733	7703	46776	11369	7271	2103	1983
MSTRG.2060	LOC100168174	facilitated trehalose transporter Tret1-like	4341	1968	622	645	351	3851	2018	612	754	119	3699	2514	1567	455	515
MSTRG.20316	LOC100166308	probable ATP-dependent RNA helicase spindle-E-like	4336	5063	5028	7194	5503	3880	4287	5277	7261	3267	3357	3643	4249	5772	5412
MSTRG.19900	LOC100168938	glutathione synthetase-like	4332	3775	2664	3399	3466	4232	3151	2935	3219	3167	4152	2744	2814	2977	2898
MSTRG.7353	LOC100160265	Asparagine synthase	4329	2577	992	766	995	3882	1972	1044	823	37750	4869	1615	814	618	1052
MSTRG.6642	LOC100162675	MFS-type transporter C6orf192-like	4328	5137	1003	506	932	4051	2259	1196	386	911	4080	2139	864	433	723
MSTRG.13910	LOC100163628	gamma-aminobutyric acid receptor-associated protein-like	4323	5969	4309	4589	6088	4302	3868	4273	4344	6949	4636	3562	4237	3522	4766
MSTRG.5802	LOC100165903	uncharacterized LOC100165903	4318	3723	2625	3613	3486	3761	2850	2928	3575	2886	3646	2491	2612	3403	3473
MSTRG.17969	LOC100160701	lethal (3) 03670-like	4313	3556	2917	4030	3301	3397	2977	3210	4514	1896	3545	3111	2216	3736	3630
MSTRG.21555	LOC100162719	eukaryotic translation initiation factor 1A-like	4306	5151	5530	8488	6685	3891	5066	6014	9692	3659	4252	5006	5363	8145	7354
MSTRG.12921	LOC100165871	pentatricopeptide repeat-containing protein 2-like	4304	4574	4856	7277	5655	3864	4924	5161	7095	2426	4128	4563	3840	5895	5261
MSTRG.2208	LOC100162973	clavesin-1-like	4302	4288	1046	757	3324	3704	2425	1777	567	20193	3797	1759	939	752	2685
MSTRG.17361	LOC100165067	nuclear transport factor 2-like	4299	5909	5595	5636	4925	3642	5843	5234	5544	2525	4122	4982	4931	4172	4719
MSTRG.19021	LOC100161581	ankyrin repeat and MYND domain-containing protein 2-like	4298	3895	4365	5192	4080	3371	3632	4654	4706	3496	3424	3151	4220	3920	4269
MSTRG.16555	LOC100160291	uncharacterized LOC100160291	4298	6190	6352	11889	7719	3874	5023	7243	12665	5343	4167	5980	4388	11588	8520
MSTRG.1697	LOC100160590	possible pseudogene or miscRNA, No KEGG entry	4295	4739	3468	5144	4471	4053	4035	3628	5465	2319	4006	3575	2456	4601	4940
MSTRG.6505	LOC100164875	angiomotin-like protein 1-like	4292	6146	4674	5154	5259	4549	5103	4686	4867	6851	4567	3569	4952	4645	4677
MSTRG.15774	LOC100164639	sulfotransferase-like	4288	3061	1539	2422	4933	3611	2173	1438	3201	1837	3267	1928	1181	1790	4559
MSTRG.10473	LOC100164899	alanine aminotransferase 2, Asparaginase	4287	4171	3040	3701	3694	3888	3742	3404	3500	3082	3853	2347	2412	2629	3143
MSTRG.8315	LOC100165185	CD63 antigen-like	4286	4168	1908	2093	2606	3810	2955	2203	2097	1813	4182	2831	1903	1585	2473
MSTRG.18723	LOC100158838	glutaredoxin 3-like	4281	5170	5263	8008	5936	3689	4644	5667	8206	2964	3992	4444	4307	6712	6587
MSTRG.14216	LOC100167383	juvenile hormone binding protein-like	4276	3437	1581	3766	6038	4209	2459	1605	3310	3186	4482	2471	1284	2960	4641
MSTRG.14490	LOC100169495	uncharacterized LOC100169495	4274	5726	8248	13427	8468	3786	5741	8980	12431	4624	3899	4460	7049	9762	9933
MSTRG.10355	LOC100162569	ubiquitin carboxyl-terminal hydrolase 47-like	4273	3981	3444	4096	3399	3593	3545	3612	4375	2445	3444	2675	3127	3217	3987
MSTRG.20863	LOC100162037	nuclear RNA export factor 1-like	4273	4963	4219	5106	4559	4023	4157	4453	5114	4751	3509	3289	3804	4340	3375
MSTRG.18432	LOC100168088	#N/A	4269	4327	3666	4886	5622	5053	3435	4241	4578	4912	3935	3209	3678	5023	5679
MSTRG.15778	LOC100167353	uncharacterized LOC100167353	4268	4314	2333	4619	4648	3432	2392	1974	4316	2381	3481	2585	1881	3368	4537
MSTRG.14968	LOC100163810	major facilitator superfamily domain-containing protein 6-like	4261	3670	1646	1037	1215	3826	2999	2017	879	740	3613	2353	930	804	1608
MSTRG.16312	LOC100160385	multiple epidermal growth factor-like domains protein 10-like	4257	4210	2894	2689	3149	4117	3090	3161	2382	3330	3467	2516	3085	2025	3651
MSTRG.20787	LOC100161415	acidic leucine-rich nuclear phosphoprotein 32 family member A-like	4257	5337	4662	4241	4191	3414	4791	4870	4329	2736	3803	4129	4209	3410	4128
MSTRG.18751	LOC100167056	DNA ligase 1-like	4254	6131	8001	10173	6364	3492	5364	8404	9545	4149	4020	5339	7185	9353	7267
MSTRG.11269	LOC100165005	uncharacterized LOC100165005	4253	5033	3573	4318	3630	3496	4695	3662	4992	2834	4285	3990	2168	3738	2741
MSTRG.19248	LOC100164876	cullin-2-like	4250	4294	3720	6088	4999	3983	4005	3985	5540	3330	3277	2882	3554	4486	4779
MSTRG.21205	LOC100159151	WD repeat-containing protein 46-like	4248	4754	4902	6889	4842	3577	4287	5084	6467	2868	3737	4365	4139	5509	4829
MSTRG.13931	Luc7l	LUC7-like (S. cerevisiae)	4245	5568	7131	10956	9546	3689	5594	7911	10991	6999	4356	5223	6384	9047	8367
MSTRG.10260	LOC100162743	rer1 protein-like	4242	3972	3242	4850	3949	3677	3466	3492	4510	2289	4237	3518	2745	3902	4131
MSTRG.5692	LOC100167878	eukaryotic translation initiation factor 2A-like	4241	4950	5785	9761	6824	3631	4828	6227	9672	3910	3662	4331	5214	7844	7876
MSTRG.19100	LOC100158679	endoplasmic reticulum resident protein 44-like	4240	3745	3219	4838	4141	3651	3209	3295	4944	1773	4083	2812	2786	3714	4219
MSTRG.20635	LOC100162792	isocitrate dehydrogenase [NAD] subunit gamma, mitochondrial-like	4238	3537	2500	2843	3578	3898	2981	2563	3768	4058	3760	3148	2326	2813	3243
MSTRG.10870	LOC100159106	solute carrier family 12 member 6-like, active transporters; similar to potassium/chloride symporter, putative, partial	4236	4695	1969	1536	1803	4201	4335	2187	444	1238	3914	2744	1420	375	1670
MSTRG.7885	LOC100158792	alcohol dehydrogenase [NADP+]-like	4230	4993	4428	6427	4453	3549	4450	4417	6613	2528	4105	4296	3348	5447	5120
MSTRG.19815	LOC100159652	apoptosis inhibitor IAP-like	4229	5115	5241	7934	6760	3576	4493	6071	7349	6497	3768	3312	5210	6553	7087
MSTRG.16033	LOC100167722	probable ATP-dependent RNA helicase DDX47-like	4228	4616	4467	4860	4128	3465	4532	4681	4193	2891	3357	3872	4676	3941	4063
MSTRG.15062	LOC100167404	stromal membrane-associated protein 2-like	4225	4433	4698	8396	6573	4022	4121	5031	7692	4158	4091	3522	4253	6300	6840
MSTRG.8725	LOC100164052	prestin-like, active transporters; similar to sulfate transporter	4224	1729	974	467	813	3437	1851	904	596	791	3215	2316	1295	418	730
MSTRG.2824	LOC100164331	glycerol kinase-like	4222	4649	3953	4755	4110	3819	4454	4121	4837	3219	4147	3906	3704	4217	4159
MSTRG.15223	LOC100160168	sortilin-related receptor-like	4222	6419	4146	5968	4254	3848	5173	5043	2618	1993	3298	3097	2145	4340	6232
MSTRG.842	LOC100163183	FCH domain only protein 2-like	4221	4758	4546	6134	5645	3583	4139	4452	6388	5130	3701	4037	3927	5858	5302
MSTRG.13697	LOC100160968	flap endonuclease-1	4217	5431	6465	9447	5018	3237	5176	7084	9176	2836	3503	5443	6025	6855	6523
MSTRG.11790	LOC100166874	ATP-binding cassette sub-family G member 4-like	4213	4284	1794	1258	846	4447	3286	1522	1224	972	2828	3651	1837	1153	734
MSTRG.5180	LOC100159843	28S ribosomal protein S29, mitochondrial-like	4210	4329	4143	5635	4579	3784	3949	4073	5350	2583	4064	3823	3600	4571	4450
MSTRG.14709	LOC100167708	uncharacterized LOC100167708	4210	4465	4481	5067	4971	3437	3905	4671	5258	4234	3500	3718	4662	4634	3884
MSTRG.18436	LOC100162766	protein sel-1 homolog 1-like	4209	4273	3463	4185	4152	3919	3461	3384	3974	2414	3696	2647	3127	2938	3486
MSTRG.16633	LOC100165091	NADP-dependent malic enzyme	4209	3329	3033	4781	4794	3756	2736	3535	4707	3515	3692	2439	2957	3212	4152
MSTRG.5007	LOC100159621	5'-3' exoribonuclease 2 homolog	4205	5696	8509	11745	8328	3687	5937	9406	11142	4320	3852	4731	8365	8982	8578
MSTRG.21452	LOC107882220	#N/A	4201	3236	2071	2376	2632	3728	2393	1875	2124	1586	3938	2907	2067	1701	2111
MSTRG.9650	LOC100166146	uncharacterized LOC100166146	4201	2992	4916	4786	7570	4196	2114	2923	8266	6144	2292	1824	2069	7326	7074
MSTRG.4992	LOC100163900	cytochrome P450 6k1-like	4197	1186	894	640	633	4268	1359	782	1003	1258	4087	1851	1580	599	659
MSTRG.13983	Mrpl45	mitochondrial ribosomal protein L45	4197	4225	3951	5899	4872	3454	3574	4248	5794	2510	3913	3967	3598	4858	4785
MSTRG.19483	LOC100164524	10-formyltetrahydrofolate dehydrogenase-like	4196	4826	3576	3904	3605	3853	3830	3947	3733	1749	3674	3316	3010	3186	3358
MSTRG.8430	LOC100161420	uncharacterized LOC100161420	4194	5374	6532	11381	8310	3474	4456	6606	10133	6463	3552	4766	5363	9768	8358
MSTRG.15898	LOC100161413	transmembrane protein 14C-like	4191	4739	7322	7228	11114	3676	4221	5060	9386	3888	4010	3959	4627	5540	5828
MSTRG.17737	LOC100163489	probable ATP-dependent RNA helicase DDX23-like	4190	5204	5797	7138	6481	3584	4862	5891	6080	4013	3829	4470	6677	5724	5479
MSTRG.11513	LOC100159569	inter-alpha-trypsin inhibitor heavy chain H4-like	4188	6786	2661	1434	1012	3517	4492	3297	1695	1710	3962	2978	1698	1574	906
MSTRG.14647	#N/A	#N/A	4187	3570	5793	8591	9676	7237	4713	4226	8135	6395	5570	3297	7356	6882	5189
MSTRG.16376	Catb-3483	cathepsin B-3483	4182	486	442	171	117	2456	1195	613	443	506	3139	2282	1151	205	432
MSTRG.11343	LOC100168314	uncharacterized LOC100168314	4182	5698	2939	1285	675	4262	3704	2362	784	1224	3818	2997	2274	755	695
MSTRG.18383	LOC100164741	ubiquitin carboxyl-terminal hydrolase 4-like	4180	4030	4252	4888	4111	3792	3474	4185	4879	2892	3228	3104	4186	4333	4079
MSTRG.11386	LOC100164242	uncharacterized LOC100164242	4178	6170	3936	10667	6937	1616	2355	8103	9413	1795	3941	5183	5989	8954	6924
MSTRG.11167	LOC100161013	splicing factor 3A subunit 1-like	4178	5322	6581	8033	5650	3761	5576	6578	6721	4295	3310	4408	6645	5561	6007
MSTRG.18638	LOC100160104	importin subunit alpha-1	4173	2382	1028	1151	1212	2865	1424	874	897	604	2649	1606	712	957	1200
MSTRG.2475	LOC100161857	structural maintenance of chromosomes protein 3-like	4167	5806	7496	12361	10222	3927	5436	8427	12266	7570	4155	5210	7250	11466	9600
MSTRG.4983	LOC100162364	transmembrane protease serine 9-like	4159	5345	821	191	123	3939	1747	856	131	45	4267	2296	633	193	93
MSTRG.10816	LOC100162365	uncharacterized LOC100162365	4154	6806	4987	3115	4612	4155	6304	5278	2479	5374	4655	5295	6120	1872	3951
MSTRG.17793	LOC100168721	RNA polymerase-associated protein LEO1-like	4153	5697	6680	8414	6849	3637	5119	6422	7840	3871	4103	5158	6314	6838	6035
MSTRG.9815	LOC103308056	#N/A	4153	6224	2613	3845	3401	3428	4058	3088	3938	4464	4143	3850	2172	3385	3143
MSTRG.11455	LOC100162668	pre-mRNA-processing factor 39-like	4152	4472	4979	7172	5533	3695	4157	5086	6150	3383	3525	3546	5245	5804	5247
MSTRG.17488	Cpped1	calcineurin-like phosphoesterase domain containing 1	4152	3128	1657	1978	1704	3439	2740	1939	2450	981	3555	2894	1548	1842	1849
MSTRG.5245	LOC100574884	uncharacterized LOC100574884	4147	4665	2959	3245	2710	3363	3961	2847	3390	1936	4433	3586	1875	2943	2315
MSTRG.7932	Eif1ad	eukaryotic translation initiation factor 1A domain containing	4143	4605	4513	6482	5385	3398	4156	4589	6407	3510	3750	3897	3812	5467	5035
MSTRG.6669	LOC100165235	translocation protein SEC62-like	4137	4024	3690	4450	5243	4206	3192	3456	4463	4020	4020	3643	3727	4572	4339
MSTRG.7768	LOC100163743	#N/A	4130	3252	3671	5968	3974	3709	4255	3778	6973	2705	3364	2783	3182	5433	4733
MSTRG.10668	LOC100162351	uncharacterized LOC100162351	4124	4281	2973	4485	3977	3425	2889	3116	4159	3059	3054	2440	2759	3264	3642
MSTRG.12780	LOC100161018	catenin alpha-like	4123	4128	6390	8813	6701	3666	4077	6731	8121	3778	3751	3016	6330	6014	7371
MSTRG.7943	LOC100159619	phosphatidylethanolamine-binding protein-like	4121	7006	4593	5234	4767	3396	4251	5095	5561	8374	3872	3575	3971	6619	4734
MSTRG.18640	Snrpd3	small nuclear ribonucleoprotein D3 polypeptide 18kDa	4120	5496	6788	9349	7858	3260	5290	7527	9750	4048	3719	5598	6642	8076	6602
MSTRG.11287	LOC100169102	zinc finger protein 91-like	4119	5953	8490	9666	8161	3357	6143	7300	10279	7664	4440	5360	7391	9121	9355
MSTRG.21224	LOC100166870	endothelin-converting enzyme 1-like	4113	6261	7254	7531	6598	4050	6179	7828	6893	4101	3733	5033	7033	5917	6731
MSTRG.17868	LOC100159929	protein 4.1 homolog	4112	5115	5683	9147	8278	4037	4919	5910	8872	6394	3967	4411	5206	7923	8153
MSTRG.12367	Aralar1	calcium-binding mitochondrial carrier protein Aralar1, active transporters; similar to AGAP000958-PA	4111	4836	4548	5634	3694	3827	4484	4934	5694	1939	3964	4012	3742	4266	4321
MSTRG.11363	LOC100161339	venom carboxylesterase-6-like	4108	3593	1587	1452	1370	3437	2726	1858	1602	1224	3836	2506	1277	1422	1414
MSTRG.9919	LOC100160182	protein CWC15 homolog	4108	4786	5783	8262	7394	3461	4778	5714	8834	4210	3958	4828	5307	7829	6798
MSTRG.6735	LOC100166371	charged multivesicular body protein 4b-like	4107	5191	4742	6940	5880	3745	4426	5247	7042	3507	4276	4139	4353	6074	5786
MSTRG.10647	LOC100167739	S phase cyclin A-associated protein in the endoplasmic reticulum-like	4107	3653	3284	7000	5384	3390	3021	3813	7056	3235	3670	3688	2723	6112	5246
MSTRG.8633	LOC100168831	transmembrane emp24 domain-containing protein 2-like	4106	4051	4097	6693	6610	3739	3803	4017	7585	3151	3790	4010	3502	6544	6635
MSTRG.19591	LOC100163568	cytoskeleton-associated protein 5-like	4104	5984	8496	12569	8508	3973	5806	8840	10949	5438	3820	4011	8237	8883	8487
MSTRG.7368	LOC100571625	uncharacterized LOC100571625	4102	5086	3333	4374	4025	3315	3267	3216	4110	3815	3616	3532	2297	4033	3224
MSTRG.16410	LOC100163324	uncharacterized LOC100163324	4102	4302	1354	1318	2106	5604	2135	1792	2317	1183	2718	1958	1269	1589	2888
MSTRG.5917	LOC100168884	dolichyl-diphosphooligosaccharide--protein glycosyltransferase subunit STT3A-like	4100	4253	4893	7390	5874	3615	3928	5229	6870	3579	3572	3467	4754	5558	6013
MSTRG.15621	LOC100168961	uncharacterized LOC100168961	4100	2183	954	670	247	3187	1778	1285	678	309	2937	1710	1118	605	388
MSTRG.9372	LOC100167336	synaptic vesicle glycoprotein 2B-like	4094	5940	4121	5334	4152	3887	3828	3720	4725	4231	4392	3799	3594	5077	5034
MSTRG.14267	LOC100158766	uncharacterized LOC100158766	4092	5085	3636	3979	6208	4757	3632	4202	3400	4413	5685	3739	5178	3400	5875
MSTRG.18754	Mrpl19	39S ribosomal protein L19, mitochondrial	4089	4610	3968	5321	4462	3324	3909	4035	4794	2373	4086	4198	3867	4408	4350
MSTRG.18695	LOC100161516	diphosphoinositol polyphosphate phosphohydrolase 2-like	4089	5416	5016	8147	7411	3900	4666	5732	7565	8237	4276	4294	5121	6866	6532
MSTRG.10269	LOC100166798	oxysterol-binding protein-related protein 9-like	4087	3827	2632	4199	3540	4028	2982	2578	4000	2862	3600	2722	2186	3017	3427
MSTRG.4039	LOC100166257	uncharacterized LOC100166257	4086	3293	1629	2396	1891	3106	1185	1080	904	1180	1872	3442	1263	1488	1286
MSTRG.10138	LOC100161659	epsin-2-like	4082	4252	2583	3777	3196	4324	3179	3542	3507	2955	4695	2297	2857	2565	2883
MSTRG.12448	LOC100166511	RNA-binding protein 8A-like	4081	5861	6771	8430	7242	3483	5345	7336	7877	4204	4311	5588	6474	7293	6648
MSTRG.17683	LOC100158983	uncharacterized protein LOC100158983	4080	3187	2234	2214	1931	4012	3175	1801	2131	1489	3817	3346	2029	2317	2244
MSTRG.7558	LOC100159994	bystin-like	4079	5143	5547	8018	6152	3365	5211	6142	8438	3201	3978	4797	4997	7283	6775
MSTRG.13340	LOC100162272	TBC1 domain family member 10B-like	4077	3606	2560	3343	3347	3836	3257	2815	3523	3920	3878	3177	2504	3189	3411
MSTRG.1655	ACYPI25621	#N/A	4076	3815	3125	4283	4153	3658	3256	2869	4951	3068	3907	3500	2617	4206	4243
MSTRG.8878	LOC100168295	MPA13 allergen-like	4076	3968	3343	8327	13593	3779	3527	3769	9901	16406	3993	3318	3482	7701	8766
MSTRG.19785	LOC100161541	omega-amidase NIT2-like	4075	5667	3744	4720	3213	3706	5215	3726	5105	1293	4601	4707	2969	4162	3475
MSTRG.7550	LOC100162030	juxtaposed with another zinc finger protein 1-like	4074	3996	2366	2558	3417	4217	3130	2500	2629	2254	3737	2963	2192	2090	2533
MSTRG.11220	LOC100166101	dodo-like	4074	5284	6627	7797	6253	3759	5286	5575	7457	3200	3477	4866	6252	6400	6508
MSTRG.11028	LOC100167887	ubiquitin carboxyl-terminal hydrolase 43-like	4072	3795	3754	5039	4439	3520	3453	4240	5047	2484	3461	3142	3537	4095	4624
MSTRG.12468	LOC100163562	developmentally-regulated GTP-binding protein 2-like	4070	4260	4264	6148	4533	3455	3893	4518	6245	2367	3738	3848	3745	5245	4863
MSTRG.21290	LOC100163571	uncharacterized LOC100163571	4067	4939	6534	7802	5736	3443	4714	6748	7456	3600	3360	4174	5845	6289	5320
MSTRG.21929	LOC100165275	facilitated trehalose transporter Tret1-like	4064	1434	681	364	236	2770	1536	926	710	274	3162	2237	1297	374	490
MSTRG.16626	LOC100167082	solute carrier family 22 member 5-like, Organic acid transporter; similar to organic cation transporter, partial	4063	2678	2357	1007	733	3957	3297	1665	990	507	3017	2535	2186	1063	1583
MSTRG.5510	LOC100169012	ferrochelatase, mitochondrial-like	4062	3992	3851	5634	5096	3932	3930	3958	5492	2563	3761	3569	3512	4411	4312
MSTRG.5450	LOC100168465	septin-2-like	4054	5623	5385	12412	8796	4088	5693	8307	12476	5516	3622	3606	4772	10389	9016
MSTRG.8487	LOC100569301	ATP-dependent RNA helicase DDX54-like	4052	4310	3964	5286	4282	3488	4024	3910	5299	2574	3707	4150	4048	4544	4147
MSTRG.13977	LOC100162828	probable cation-transporting ATPase 13A1-like	4050	3392	3222	5298	4311	3459	3480	3684	5147	2075	3304	3074	2900	4371	4554
MSTRG.21652	LOC100162600	uncharacterized LOC100162600	4048	4664	2063	1673	1577	4497	3757	1949	1310	895	4407	2709	1168	1420	1750
MSTRG.6168	LOC100161865	actin-interacting protein 1-like	4044	4408	4224	6628	5813	3507	3639	4465	6653	3739	3557	3302	4387	5105	5810
MSTRG.6638	LOC100169235	uncharacterized LOC100169235	4043	8379	8035	12963	11132	4328	8382	8943	13305	6958	5348	7102	7320	11360	11183
MSTRG.3458	LOC100160083	nucleolar protein 10-like	4040	4381	4725	6574	4988	3299	4219	4903	7078	2856	3558	4240	3882	5955	5370
MSTRG.11391	LOC100162175	serine/threonine-protein phosphatase 2B catalytic subunit 3-like	4028	4434	3091	4140	5106	3986	3836	3459	3746	4614	4342	2982	3691	3598	4685
MSTRG.17397	LOC100166295	uncharacterized LOC100166295	4026	3767	3810	5887	5516	3647	3545	3940	5682	3358	3455	3158	3455	5157	4719
MSTRG.1274	LOC100169459	uncharacterized LOC100169459	4021	5210	4783	3205	3647	3970	4764	4571	2770	4615	3372	2875	4162	2143	3662
MSTRG.20286	LOC100162246	lon protease homolog, mitochondrial-like	4020	4421	3745	5713	4790	3296	3506	4036	5250	1963	3368	3289	3642	4431	4309
MSTRG.18713	LOC100159479	uncharacterized protein KIAA0090 homolog	4018	4079	4073	7257	6085	4032	3964	4833	7161	3056	3757	3611	3917	5717	6315
MSTRG.2093	LOC100167005	putative fatty acyl-CoA reductase CG5065-like	4017	2655	1599	1523	1796	4139	2624	1128	1632	1265	2685	2215	1141	1562	2008
MSTRG.4909	LOC100164693	nucleobindin-2-like	4014	5416	4532	6864	5250	3878	3908	4829	5708	3632	4329	4062	3994	5566	5007
MSTRG.2533	LOC100167122	uncharacterized LOC100167122	4014	4657	5421	11167	8722	3933	4133	5745	10725	6749	3714	4285	4655	10085	8551
MSTRG.20192	LOC100168434	transmembrane protein 49-like	4011	4248	2906	3933	2943	3357	3767	2873	3326	1752	3405	3041	2449	2826	2853
MSTRG.17184	LOC100165881	peptidyl-prolyl cis-trans isomerase FKBP6-like	4008	5208	4684	6254	1267	3622	4308	4980	6331	2645	3124	3939	3649	5246	5473
MSTRG.9761	LOC100165162	dnaJ homolog subfamily C member 3-like	4007	4668	3045	4698	4139	4010	3535	3197	4943	2871	4165	3005	2430	3897	4236
MSTRG.10145	LOC100158890	serine/threonine-protein kinase SRPK2-like	4002	4298	4234	5271	4623	3349	3980	4490	5005	3151	3295	3362	4173	4177	4767
MSTRG.16245	LOC100164364	uncharacterized LOC100164364	3999	4111	3986	7019	5084	3587	3896	4371	6968	3827	3741	3829	3525	5749	5464
MSTRG.2126	LOC100164306	dnaJ homolog subfamily C member 1-like	3996	4913	4436	3775	5603	4563	3463	4476	3607	3452	4216	4365	4045	3645	3661
MSTRG.4974	LOC100164452	pleiotropic regulator 1-like	3995	4880	6450	8762	6329	3242	5071	6670	8282	3331	3603	4628	6914	6945	5588
MSTRG.20218	LOC100167245	coatomer subunit beta'-like	3994	4235	4011	5777	4536	3584	3881	4403	5105	2178	3398	2890	3663	4022	4611
MSTRG.21223	LOC100162819	6-phosphofructo-2-kinase/fructose-2,6-biphosphatase-like	3992	4943	4017	2075	3322	3723	4457	4058	1937	3089	5081	4160	4229	1592	2296
MSTRG.14233	LOC100575974	pre-mRNA-splicing factor ATP-dependent RNA helicase PRP16-like	3989	4889	5584	7560	5885	3479	4475	5106	7526	3580	3658	4126	5320	6456	5634
MSTRG.16697	LOC100162971	microfibrillar-associated protein 1-like	3985	4484	5036	7613	6353	3209	4814	5834	8500	4200	3922	4321	5367	7879	6632
MSTRG.20512	LOC100162438	uncharacterized LOC100162438	3983	4570	2897	1905	2621	3467	3714	3232	1760	4947	5340	3437	2907	1490	2785
MSTRG.10702	LOC100161622	endoplasmic reticulum aminopeptidase 2-like	3982	1803	1061	884	625	4057	1793	1180	870	903	3859	2135	1804	607	1068
MSTRG.2363	LOC100575173	plexin-A3-like	3979	6668	4495	2848	3057	3543	6371	1555	3069	480	5099	5613	2088	2556	2364
MSTRG.6820	LOC103309867	#N/A	3977	3831	4086	5228	3847	3248	3476	4201	4590	2424	2798	3082	3658	4117	4087
MSTRG.19372	LOC100168993	probable phenylalanyl-tRNA synthetase beta chain-like	3972	4811	5239	7300	5381	3369	4519	5455	6750	2701	3642	4396	4699	5645	5323
MSTRG.10560	LOC100162884	chaperone activity of bc1 complex-like, mitochondrial-like	3972	4012	3314	3582	4035	3395	3281	3116	3453	2525	3682	3009	2978	2505	3367
MSTRG.11582	LOC103308638	#N/A	3964	7161	6069	4562	5642	4234	6290	7295	3897	5941	4249	4342	8112	3147	5930
MSTRG.7989	LOC100161453	signal peptidase complex subunit 3-like	3961	3760	3792	6194	5553	3501	3602	3734	6151	2446	3633	3544	3153	4813	5145
MSTRG.5256	LOC100167375	regulatory-associated protein of mTOR-like	3958	4406	3431	4494	3762	3762	3544	3461	3290	2301	3077	2997	2364	3192	3931
MSTRG.21637	LOC100166129	uncharacterized LOC100166129	3955	4570	4198	6416	5425	3995	3876	4965	5428	3421	2985	2676	3789	4104	5363
MSTRG.21	ND4	NADH dehydrogenase subunit 4	3955	3570	2568	5231	4517	4251	3561	2337	6503	3513	3851	5224	3550	6187	3337
MSTRG.13146	LOC100168742	uncharacterized LOC100168742	3953	5339	4719	8067	6856	3401	4575	4996	7464	4848	3636	3958	3018	6824	6282
MSTRG.8547	Apool	apolipoprotein O-like	3951	4078	2983	4380	4030	3582	3174	3140	4203	2335	3503	3033	2631	3694	3568
MSTRG.10502	LOC100164906	uncharacterized LOC100164906	3950	3850	1789	2004	3336	3670	2877	2014	2089	1997	2823	1958	1482	1493	3277
MSTRG.8568	LOC100161610	prominin-like protein	3948	4914	5053	6192	5130	3969	4565	5726	6447	5029	3543	2852	4288	5022	5950
MSTRG.13559	LOC100159108	U2 small nuclear ribonucleoprotein A-like	3947	5613	7203	11703	8331	3298	5319	7988	12317	4572	3725	5496	5392	10482	10002
MSTRG.12517	LOC100158999	calumenin-B-like	3945	4232	3947	6294	4865	3569	3592	4285	6067	3636	3271	2956	3255	4953	5407
MSTRG.14304	LOC100159588	uncharacterized LOC100159588	3945	4273	1110	391	878	2904	2345	1103	467	196	2887	1706	897	384	687
MSTRG.2792	LOC100168560	succinyl-CoA ligase [GDP-forming] subunit beta, mitochondrial-like	3942	4486	3450	5326	4612	3729	3863	3706	5812	3664	3482	3499	3257	4602	4070
MSTRG.16747	Cprr1-11	RR1 cuticle protein 11	3942	1691	326	31	3297	8163	1737	531	23	3829	11117	2411	394	57	1313
MSTRG.11957	LOC100165448	uncharacterized LOC100165448	3938	4508	4491	8646	6604	3541	3865	5259	7829	5075	3299	3836	4101	7533	6225
MSTRG.20247	LOC100165620	calcium/calmodulin-dependent protein kinase kinase 2-like	3937	5451	2032	1598	3577	4129	4200	3302	1404	9536	5101	3351	1374	1626	3285
MSTRG.9458	LOC100165299	uncharacterized LOC100165299	3936	5431	7086	10398	6036	3681	4838	7566	8936	3812	3726	3927	5284	6915	7984
MSTRG.6157	LOC100168855	low-density lipoprotein receptor-related protein 2-like	3936	7122	4469	2932	4817	4028	5488	5533	2448	3884	4313	3654	4404	1897	4116
MSTRG.17734	LOC100164092	embryonic polarity protein dorsal-like	3935	5080	4333	4900	6253	3724	3549	3117	5618	5425	3623	2699	2669	3822	2677
MSTRG.21262	LOC100159067	guanine nucleotide-binding protein G(s) subunit alpha-like	3934	3730	2802	3459	4207	4426	3088	3057	3220	4525	4026	3541	2905	3060	3673
MSTRG.7627	LOC100165718	sodium/hydrogen exchanger 9B2, mitochondrial sodium/hydrogen exchanger NHA2-like	3934	2394	1290	1975	1503	3733	2413	1743	1711	1511	4248	2657	2607	1390	2023
MSTRG.6587	LOC100168781	glycerol-3-phosphate acyltransferase 4-like	3932	4570	2602	3033	2399	3867	3136	2673	2740	1813	3082	2240	2252	2382	2588
MSTRG.10687	LOC100167137	endoplasmic reticulum lectin 1-like	3930	3698	2624	5243	4658	3801	3404	3128	5218	3016	3947	3280	2689	4388	5035
MSTRG.423	LOC100166343	possible pseudogene or miscRNA, No KEGG entry	3927	4134	2739	3953	2725	2909	3274	3120	3265	1992	3347	2808	3325	2617	2816
MSTRG.10559	LOC100164968	uncharacterized LOC100164968	3925	3918	1557	976	1965	3769	2810	1784	1182	2968	4010	2316	1476	948	1906
MSTRG.11901	LOC100168710	1-acyl-sn-glycerol-3-phosphate acyltransferase delta-like	3923	5476	2335	2824	1720	2984	3535	2402	2345	1202	3787	3225	1944	2426	1761
MSTRG.8761	LOC100168776	#N/A	3922	4589	5311	7209	5488	3698	4249	5630	7298	3834	3570	3760	4643	6091	6134
MSTRG.21771	LOC100163970	elongation of very long chain fatty acids protein AAEL008004-like	3919	2702	5142	1083	2301	4573	9688	9186	1052	6882	10447	3971	5019	622	2425
MSTRG.5440	LOC100165963	ZM-domain protein	3918	1714	619	238	2235	3309	1276	617	334	1600	4338	1761	339	247	1365
MSTRG.15957	LOC100166925	peroxisomal targeting signal 1 receptor-like	3917	4718	3733	5280	3553	3903	3719	3554	4564	3351	3244	2919	3359	3640	3852
MSTRG.7184	LOC100161891	uncharacterized LOC100161891	3914	4504	4833	9014	6869	3243	3808	5050	9877	4005	3545	4882	4233	8609	6943
MSTRG.9308	Vbp1	prefoldin subunit 3	3911	5667	4822	7922	6466	2732	4134	5404	11031	2810	3188	5206	3935	8890	6622
MSTRG.20944	LOC100163432	glycylpeptide N-tetradecanoyltransferase 1-like	3910	5076	5676	8020	5515	3459	4414	6220	7691	3976	3597	3396	4512	5942	6429
MSTRG.21134	LOC100167459	uncharacterized LOC100167459	3909	6539	4480	1572	1327	3237	5852	5015	1129	1323	4430	4123	3911	976	1802
MSTRG.11353	LOC100163664	innexin inx3-like	3908	5442	7485	12345	11273	3866	5501	7494	11180	5314	3477	4390	7116	8869	11509
MSTRG.19658	LOC100572308	uncharacterized LOC100572308	3908	2478	648	306	304	3391	1169	451	300	93	2729	1559	826	206	259
MSTRG.21699	LOC100165461	probable ATP-dependent RNA helicase DDX46-like	3906	5945	6132	9006	6477	3807	5518	6543	9357	4357	4065	5088	6517	6949	6838
MSTRG.16031	Ccdc47	coiled-coil domain containing 47	3906	3703	3871	5998	5098	3573	3600	4171	6201	2814	3633	3842	3476	5462	5250
MSTRG.9759	LOC100165870	uncharacterized LOC100165870	3904	2949	1751	930	4010	3667	3030	2111	1249	3698	7306	2392	1287	760	2390
MSTRG.17533	LOC100167997	putative mitochondrial inner membrane protein-like	3903	4384	3504	5119	3799	3055	3871	4105	6935	2467	3768	3965	2642	5551	5569
MSTRG.5406	LOC100167253	filamin-C-like	3902	5095	5598	7842	7586	3885	4261	5914	6408	5054	3347	3267	4542	5532	6414
MSTRG.20615	LOC100161085	putative inorganic phosphate cotransporter-like	3900	738	287	329	136	2373	1309	590	249	196	2617	1563	798	265	244
MSTRG.15915	LOC100159835	prestin-like, active transporters; similar to sulfate transporter	3900	4343	1092	2116	1203	3768	2944	1207	1737	1038	3617	2694	1565	1519	1784
MSTRG.5165	LOC100166627	FUN14 domain-containing protein 1-like	3899	3773	3872	6945	6939	3775	3027	4121	6957	4534	3719	3097	3918	6084	5611
MSTRG.16286	LOC100160136	small subunit processome component 20 homolog	3898	3784	4050	6012	4065	2808	3602	4390	5099	2375	2631	3283	3520	4786	4345
MSTRG.3356	Rbm34	RNA binding motif protein 34	3897	5312	5237	9549	6666	3202	4676	5899	10588	3487	3758	5914	4390	9442	6925
MSTRG.193	LOC100161473	MFS-type transporter C6orf192 homolog	3895	1507	618	507	653	3381	1793	734	650	1636	3842	2027	1376	443	642
MSTRG.8738	LOC100163176	insulin-like growth factor 2 mRNA-binding protein 1-like	3893	6026	4891	6785	3359	3585	7701	5016	8230	6159	3163	3274	5066	7984	4807
MSTRG.14040	LOC100165171	adenylyl cyclase-associated protein 1-like	3891	4899	5959	7667	7221	3328	4651	5701	7112	4035	3754	3376	5154	5401	6772
MSTRG.16181	LOC100168691	probable galactose-1-phosphate uridylyltransferase-like	3885	2312	1384	2282	2250	3303	1812	1603	2656	3815	3806	2086	1743	2300	1822
MSTRG.10886	LOC100160770	collagen type IV alpha-3-binding protein	3885	4256	3342	4429	4150	3252	3392	3480	4259	4238	3091	2736	2909	3483	3889
MSTRG.5579	LOC100569675	GTP-binding protein 128up-like	3875	5117	5419	7719	5387	3332	5215	5602	7114	2853	4043	4756	4806	5711	5053
MSTRG.18755	LOC100160927	malectin-like	3873	4524	4720	4427	5323	3678	3919	4605	3754	3115	4079	4211	4898	3304	4334
MSTRG.5740	LOC100167167	SWI/SNF complex subunit SMARCC2-like	3870	5366	7009	5055	5042	3709	5185	6420	3963	4121	3521	4097	7150	3797	5550
MSTRG.7487	LOC100160633	glutamate--cysteine ligase catalytic subunit-like	3870	4001	2244	1319	2323	3902	3046	2079	1050	2154	3260	2566	2561	967	1724
MSTRG.11652	Csn5	COP9 complex homolog subunit 5	3870	4424	5176	8449	6177	3541	4058	5959	8917	3029	3934	4231	4986	7181	7051
MSTRG.12113	LOC100571286	possible pseudogene or miscRNA, No KEGG entry	3867	3113	2316	2651	3070	3482	2953	2581	3564	2666	3444	2639	1862	2331	2898
MSTRG.12882	LOC100164300	carnitine O-palmitoyltransferase 1, liver isoform-like	3862	4005	3379	4432	3788	3783	3773	3376	4013	3246	3230	2539	2453	3074	4217
MSTRG.8314	LOC100570711	possible pseudogene or miscRNA, No KEGG entry	3860	5354	6877	8425	5950	3284	5766	6662	8048	3489	3553	5137	6855	7151	5420
MSTRG.4812	LOC100168178	amino acid transporter; cationic AA transmembrane	3860	3517	1841	818	329	2649	2937	1712	778	93	3426	2059	1023	640	557
MSTRG.5678	LOC100571627	anaphase-promoting complex subunit 2-like	3859	6191	5971	10999	8929	3919	5427	6749	11423	5864	4025	5736	4690	10567	8794
MSTRG.5044	Mrpl2	mitochondrial ribosomal protein L2	3858	3775	3304	2813	3323	3407	3581	3271	2636	2244	3669	3453	3332	2116	2771
MSTRG.22051	LOC100160399	rab6-like	3857	3927	3814	6816	6914	3452	3363	4470	7778	3630	3621	3616	3615	6049	6663
MSTRG.8648	LOC100161196	stress-associated endoplasmic reticulum protein 2-like	3857	4796	3405	3895	4944	3486	3600	3424	3900	2705	4522	3881	3122	3197	4090
MSTRG.15065	LOC100159234	RNA-binding protein fusilli-like	3856	4187	2820	3723	3451	2636	3614	3052	3813	3785	3108	2781	2231	3695	4175
MSTRG.10410	LOC100164852	gamma-glutamyltranspeptidase 1-like	3856	2074	737	541	702	3494	1457	823	501	451	2849	1731	720	298	835
MSTRG.17383	LOC100160938	uncharacterized LOC100160938	3856	4487	3654	4567	4297	3860	3483	3398	3974	2699	3619	2838	3429	3255	4038
MSTRG.7536	LOC100165586	possible pseudogene or miscRNA, No KEGG entry	3855	5533	6346	8737	7785	3858	4889	6614	8858	4726	4242	4650	6001	7699	7351
MSTRG.12759	LOC100163093	lysosomal-trafficking regulator-like	3855	4730	3285	4878	3119	3381	3592	3686	2754	2830	2741	2179	1955	2840	3374
MSTRG.16029	Mlpt	mille-pattes	3850	4697	2075	3385	3782	3684	2563	1634	3060	2237	3803	2981	1781	2519	2738
MSTRG.11147	LOC100166686	uncharacterized LOC100166686	3849	4506	5301	9482	8490	3988	4345	6345	9433	5248	3528	4122	4748	7981	7542
MSTRG.8816	LOC100164494	uncharacterized LOC100164494	3846	3387	831	361	933	3697	2154	962	526	1875	3236	1769	898	624	1026
MSTRG.16640	LOC100165798	putative succinate dehydrogenase [ubiquinone] cytochrome b small subunit, mitochondrial-like	3844	3332	2862	4403	4380	3367	3291	2979	5225	2650	3689	3660	2603	4500	3775
MSTRG.8106	LOC100161330	signal recognition particle 19 kDa protein-like	3842	4418	3925	5805	6000	3431	3716	4367	5583	4189	3841	4309	4053	5420	4758
MSTRG.20188	LOC100167534	uncharacterized LOC100167534	3842	3511	3044	4666	5704	4036	2512	3833	4188	6823	4108	2622	3158	4205	5690
MSTRG.18422	LOC100159915	uncharacterized LOC100159915	3841	4915	4422	5664	4688	3480	4197	5248	4718	4121	3343	3080	4565	4164	4524
MSTRG.16732	LOC100169429	transmembrane 9 superfamily member 3-like	3838	3846	3368	5743	4895	3421	3418	3378	5804	2277	3681	3231	3129	4982	5005
MSTRG.6095	LOC100165572	glutamate [NMDA] receptor-associated protein 1-like	3838	3833	3163	3882	3745	3399	3232	3063	3990	2991	3760	2666	3006	2771	3712
MSTRG.16313	LOC100166251	probable cytosolic iron-sulfur protein assembly protein Ciao1-like	3837	3317	3748	4976	4566	2820	3370	3869	4831	1898	3536	3346	3658	3866	4250
MSTRG.16594	LOC100162783	transcription initiation factor TFIID subunit 10-like	3836	3200	1782	4688	3748	1807	2417	5731	4383	3897	2169	2559	2573	4481	4045
MSTRG.14139	LOC100167458	pre-mRNA-processing factor 17-like	3834	4134	4687	6530	5030	3269	3787	4842	6418	3009	3083	3184	4668	5173	4986
MSTRG.11083	LOC100164984	cell division control protein 6 homolog	3834	4213	4351	6995	6361	3241	3841	4759	6993	3085	3641	3709	3605	6275	6001
MSTRG.5835	LOC100162477	uncharacterized LOC100162477	3834	4190	3820	4982	4723	2970	3419	4335	4844	4490	3108	3009	3793	4195	4493
MSTRG.15708	LOC100165609	sorting nexin-like	3832	3585	3624	5262	4609	2653	2860	3498	4962	3584	3595	3333	3084	4911	4330
MSTRG.22025	LOC100161975	g2/M phase-specific E3 ubiquitin-protein ligase-like	3829	4890	6055	7190	6434	3573	4661	5929	6315	5454	3532	3455	5801	5815	5592
MSTRG.2417	LOC100163220	proton-coupled amino acid transporter 4-like	3827	1397	382	325	244	3825	1426	562	406	2406	4027	1832	1651	295	339
MSTRG.10673	LOC100160529	coiled-coil domain-containing protein 6-like	3826	4001	4283	5666	4337	3331	3370	4010	5233	3121	2885	3073	3818	4722	4677
MSTRG.2703	LOC100163426	WD repeat-containing protein 36-like	3826	3838	3952	4554	3348	3409	3983	4231	3974	2074	2988	3082	4002	3161	3407
MSTRG.9991	LOC100159627	uncharacterized LOC100159627	3824	5666	5288	4364	4984	3544	5482	5331	3680	4418	3637	3297	4915	3250	5149
MSTRG.15848	LOC100166946	DNA mismatch repair protein Msh6-like	3815	4463	4073	4548	3239	3281	4461	5445	3704	2021	3534	3419	5261	3474	3508
MSTRG.15123	LOC100162066	glucosamine--fructose-6-phosphate aminotransferase [isomerizing] 2-like	3812	4593	3415	3292	3623	3280	4382	3607	2891	2259	3291	3041	3285	2622	3567
MSTRG.13964	LOC100165490	ester hydrolase C11orf54 homolog	3811	3123	1665	1444	1648	2659	2518	1796	1231	1652	3232	2084	1488	1255	1207
MSTRG.7013	LOC100168764	ran-binding protein 9-like	3810	4403	4299	4556	4558	3644	3861	4366	4201	4396	3442	3028	3973	3565	4484
MSTRG.17797	LOC100164635	dynamin-1-like protein-like	3806	1217	1021	955	649	3091	1492	1380	544	1068	1927	1099	1381	371	954
MSTRG.20667	LOC100168459	1-acyl-sn-glycerol-3-phosphate acyltransferase alpha-like	3806	4018	2952	3740	3050	3501	3328	2885	3631	2213	3226	2718	2267	3037	3094
MSTRG.12430	#N/A	#N/A	3805	4440	4576	5550	5840	3489	3440	3907	6990	3565	3809	3981	3757	5497	4760
MSTRG.21837	LOC100166615	uncharacterized LOC100166615	3804	2016	864	1016	1316	3719	1994	750	892	631	2785	2223	1095	969	1185
MSTRG.20081	LOC100161600	putative mitochondrial inner membrane protein-like	3804	4603	3699	4380	3550	3979	3878	3686	4482	2252	3812	3325	2661	3652	4249
MSTRG.6359	LOC100163566	uncharacterized LOC100163566	3804	5990	5825	753	2027	6023	12311	10372	592	3991	26550	6471	6210	699	2811
MSTRG.7189	LOC100167399	U3 small nucleolar ribonucleoprotein protein imp4-like	3801	4789	3649	2634	2902	3238	4041	3401	2381	2694	3644	4384	4121	2318	2841
MSTRG.8214	LOC100158972	ankyrin-2-like	3799	3394	3249	4980	3886	3218	3203	4051	4774	3521	3378	2534	3954	3475	4332
MSTRG.17434	LOC100168393	cohesin subunit SA-1-like	3796	5371	8145	11897	8259	3485	5401	9066	11093	5227	3234	4201	7790	9432	8400
MSTRG.20288	LOC115032981	#N/A	3795	4137	2130	2593	2328	2919	2740	2304	2960	2155	3429	2605	1331	2820	2174
MSTRG.11340	LOC100165703	uncharacterized LOC100165703	3792	5362	4259	3689	4322	3759	4664	4694	3283	4429	4236	4002	4821	3153	4096
MSTRG.20966	LOC100165776	uncharacterized LOC100165776	3790	4608	3491	2568	3203	3279	3840	3842	2165	3509	3910	4002	4418	2083	3415
MSTRG.12007	LOC100161302	uncharacterized protein LOC100161302	3788	4570	5672	9257	7905	3333	4278	6258	8327	5243	3405	4130	4561	7845	7103
MSTRG.1022	LOC100165396	uncharacterized LOC100165396	3786	6701	2084	638	660	2374	4237	2398	277	326	3649	2813	1456	279	639
MSTRG.13242	LOC100575757	possible pseudogene or miscRNA, No KEGG entry	3785	2026	1561	2516	1313	2718	3326	2852	4987	1495	4173	5030	3966	3422	2223
MSTRG.2015	LOC100168956	uncharacterized LOC100168956	3782	4357	5084	8710	6392	3167	4204	5597	8933	4294	3310	4406	4518	8409	6128
MSTRG.20314	LOC100162134	RING finger protein 10-like	3781	4621	3612	4926	4370	3755	3799	3824	4763	3540	4035	3759	3161	3986	4340
MSTRG.18175	LOC100162851	bifunctional ATP-dependent dihydroxyacetone kinase/FAD-AMP lyase (cyclizing)-like	3774	3052	1887	2872	2596	3312	2518	2249	2616	2276	3178	2303	2014	2403	2294
MSTRG.9294	LOC100169461	alpha-tubulin N-acetyltransferase-like	3774	4871	6731	8581	5703	2818	4853	7195	7848	3197	2993	3993	6220	5872	6645
MSTRG.11032	LOC100163355	hepatocyte growth factor-regulated tyrosine kinase substrate-like	3774	4064	4078	4730	5106	3732	3598	4123	4151	3811	3177	2898	3850	3353	3997
MSTRG.17570	LOC100160941	disheveled-associated activator of morphogenesis 2-like	3773	3019	2399	2765	2786	3379	2272	2550	2732	2786	2945	2153	2295	2044	2608
MSTRG.8606	LOC100164987	coiled-coil domain-containing protein 55-like	3772	4372	4329	7298	6055	3264	3965	4661	7330	3655	3501	4305	4118	7101	5596
MSTRG.21716	LOC100166172	uncharacterized LOC100166172	3771	4194	3191	3087	3288	3412	3443	2683	3616	2528	3531	3511	2098	2173	3304
MSTRG.6623	LOC100164656	uncharacterized LOC100164656	3770	3875	1054	950	1041	3413	2343	1387	623	445	3361	1760	866	598	1024
MSTRG.13923	LOC100569910	rho GDP-dissociation inhibitor 2-like	3768	5431	6073	10193	7449	3567	4939	6653	10220	4409	3834	4843	5826	8285	7505
MSTRG.17673	LOC100570959	uncharacterized LOC100570959	3768	6978	4509	2736	1893	3400	5649	4837	2223	1326	3481	4712	5113	1994	2172
MSTRG.15475	LOC100160523	adenylosuccinate lyase-like	3767	4200	3510	3798	3216	2942	3421	3466	3721	1839	3719	2976	3151	3011	3170
MSTRG.10742	LOC100165559	chromosome-associated kinesin KIF4-like	3767	5459	7598	12538	6623	3105	5153	8803	11257	3565	3533	5221	6390	10376	7920
MSTRG.12379	LOC100571361	possible pseudogene or miscRNA, No KEGG entry	3766	5023	5184	6951	6984	3095	5042	6285	6659	3576	3967	5151	5642	6437	6605
MSTRG.10664	LOC100162127	histone acetyltransferase p300-like	3766	4436	3314	5039	3156	2628	3025	4843	2805	2979	2754	2134	4186	2632	3170
MSTRG.20342	LOC100158995	tectonin beta-propeller repeat-containing protein-like	3765	4424	2154	2787	2398	3657	3414	2748	2524	2065	3244	2638	1786	2462	2480
MSTRG.8287	LOC100168234	nuclear receptor-binding protein homolog	3762	4983	2527	1897	2495	3789	3286	3087	1425	4010	4239	2044	2483	1521	2593
MSTRG.8067	LOC100159350	uncharacterized LOC100159350	3759	3963	3265	4177	3496	3053	3678	3929	3522	3576	2818	2639	3094	2850	3891
MSTRG.13705	ACYPI52223	#N/A	3756	3814	2490	2358	2892	3069	2814	2580	2482	1813	3382	3003	2784	1864	2318
MSTRG.16050	LOC100164662	xaa-Pro dipeptidase-like	3750	3736	2547	2542	2958	3144	3091	2935	2440	2595	3177	3014	2634	1880	2760
MSTRG.8519	LOC100163157	protein Red-like	3750	3824	4290	5706	5288	3290	3845	4398	5366	4297	3226	3165	4464	5082	4881
MSTRG.5263	LOC100163807	Protein transporter; synaptic vesicle glycoprotein 2; similar to CG14691 CG14691-PA	3749	3518	2354	2514	2601	3062	2889	2027	2688	1487	3633	3069	1539	2406	1624
MSTRG.5679	LOC100166836	probable serine incorporator-like	3745	3506	3331	5204	4340	3214	2899	3767	5334	3286	3025	2549	3067	3957	4592
MSTRG.9625	LOC100569662	integrin beta-PS-like	3743	3774	3735	6229	5087	3045	3162	3530	5055	4154	3367	2606	3227	4664	4630
MSTRG.8397	LOC100163425	neurobeachin-like	3740	3859	3746	7347	8191	4165	3559	4192	7766	5593	3696	3960	3529	7582	6803
MSTRG.7220	LOC100167569	axin-related protein-like	3740	5911	8063	8282	6597	3302	6431	8400	7184	6423	3494	4560	8394	5725	6591
MSTRG.15507	LOC100158908	dynamin-like 120 kDa protein, mitochondrial-like	3738	3827	3408	5596	4539	3478	3505	3683	5145	2415	3166	2998	3007	4454	4254
MSTRG.3197	LOC100163533	uncharacterized LOC100163533	3737	4706	3845	2771	3471	3506	3798	4014	2452	3542	3851	3530	4264	2325	3531
MSTRG.17224	LOC100159553	condensin-2 complex subunit D3-like	3734	4611	6833	600	5966	2985	5018	7360	8503	2983	3165	4159	6197	7433	6354
MSTRG.8875	Pgam5	phosphoglycerate mutase family member 5 (EC:3.1.3.16)	3732	4177	4369	7617	6838	3798	3893	4944	8246	3976	3986	4157	4643	7145	6479
MSTRG.18010	LOC100159995	DDB1- and CUL4-associated factor 13-like	3727	4507	4814	7466	5615	3254	4299	5454	7445	3066	3593	3712	4411	6085	5853
MSTRG.1990	LOC100161405	cytochrome P450 4C1-like	3725	5965	5747	4429	2831	3311	5815	5495	3672	2195	4326	5019	7122	3553	4015
MSTRG.5952	LOC100169209	RNA-binding protein lin-28-like	3725	14277	16452	12181	7060	3426	13652	16628	10975	7256	5473	11074	17056	10367	7944
MSTRG.17460	Csp	cysteine string protein	3724	4240	2992	3199	3518	3670	3951	3844	2478	2143	3560	2712	3843	2038	3514
MSTRG.9590	LOC100164297	ribonuclease Z, mitochondrial-like	3724	4389	4256	6603	5554	3236	3688	5056	6983	3189	3233	3635	3433	5700	5855
MSTRG.10605	LOC100163407	ATP-dependent RNA helicase DDX42-like	3723	4515	5381	5685	5194	3016	4505	5367	4893	3878	3335	4203	5751	4463	4753
MSTRG.20470	LOC100160479	uncharacterized LOC100160479	3721	2305	591	2368	7181	3834	1227	966	2663	3600	4094	1523	713	2392	5723
MSTRG.15862	LOC100162519	U1 small nuclear ribonucleoprotein A-like	3721	5624	7135	10720	7991	3360	5588	8001	10961	3322	4330	5645	6175	10023	8607
MSTRG.14091	LOC100160987	uncharacterized LOC100160987	3720	3092	1219	3207	4797	5024	1973	1638	2795	2840	2916	1699	1483	1626	3944
MSTRG.9083	LOC100169411	uncharacterized LOC100169411	3717	10622	8304	7640	7801	3397	7526	9215	6713	4147	5228	7808	13498	6055	13818
MSTRG.5620	LOC100167236	ubiquitin-conjugating enzyme E2 S-like	3717	5581	6251	9377	6743	3339	4664	6605	8576	3812	3372	4029	5155	8037	6834
MSTRG.8655	LOC100168076	protein bicaudal C homolog 1-like	3716	2357	571	557	584	3373	1297	589	499	262	2055	1011	452	470	470
MSTRG.1920	LOC100160043	serologically defined colon cancer antigen 1 homolog	3715	4009	3736	4739	4868	2782	3623	4088	5444	2854	3193	3486	3047	5028	4440
MSTRG.5631	LOC100160146	pre-rRNA-processing protein TSR1 homolog	3714	4088	4381	5450	4358	2805	3907	4475	5688	1953	3045	3458	3894	4426	4889
MSTRG.4807	LOC100161412	high affinity cationic amino acid transporter 1-like	3711	3472	1297	840	1016	3608	3191	1617	1004	1569	3591	2025	1673	863	1268
MSTRG.14180	LOC100570286	uncharacterized LOC100570286	3705	4631	3839	5986	5805	3740	3742	3989	5983	2923	4210	3595	3582	4965	6215
MSTRG.9307	LOC100159941	nuclear pore complex protein nup98	3705	4837	6756	9972	6114	3340	4727	7540	9275	3629	3208	3828	5170	7539	7105
MSTRG.19231	LOC100167174	cysteine desulfurase, mitochondrial-like	3703	3220	2864	3693	3891	3703	2897	2875	3821	2212	2894	2555	2429	2574	2755
MSTRG.10247	LOC100168568	possible pseudogene or miscRNA, No KEGG entry	3703	3808	3349	4140	2885	3273	3129	3642	3891	2676	3021	2536	2434	3256	3721
MSTRG.16275	LOC100167661	disco-interacting protein 2-like	3700	3770	3041	4684	5396	3534	3299	3301	4111	4413	3212	2338	3273	3383	4653
MSTRG.2831	LOC100160080	long-chain-fatty-acid--CoA ligase 3-like	3699	4678	2624	4086	4378	3528	3368	3068	4712	2748	3649	2421	2577	3388	5171
MSTRG.11000	LOC100167309	pyridoxal kinase-like	3697	3581	2140	3423	3415	3338	3018	2825	4781	2060	2868	2842	1355	2826	3720
MSTRG.2862	LOC100162870	uncharacterized LOC100162870	3692	4692	4225	4585	4245	3381	4275	4580	3692	4300	3407	3154	5095	3035	3727
MSTRG.16828	LOC100166140	CAAX prenyl protease 1 homolog	3686	3996	4829	8490	8066	3130	3741	5311	9305	3757	2555	3893	3334	7257	6967
MSTRG.8528	LOC100164509	valyl-tRNA synthetase-like	3684	4426	4586	7255	5097	3471	3884	4771	6779	3361	3192	3310	3507	5306	5365
MSTRG.11918	LOC100571279	putative H/ACA ribonucleoprotein complex subunit 3-like protein-like	3683	6189	6141	7134	5705	3086	5357	6121	7456	3175	4536	6346	5502	7368	5901
MSTRG.5164	LOC100164615	ankyrin repeat, SAM and basic leucine zipper domain-containing protein 1-like	3673	3841	2580	4025	3433	3172	3143	2692	4144	3535	3257	2687	2031	3714	3744
MSTRG.19109	LOC100164339	transmembrane protein 20-like	3671	2863	2109	2957	2617	2651	2079	2082	2756	1556	2787	2497	1814	2425	2649
MSTRG.11872	LOC100163482	DNA replication licensing factor MCM4-like	3668	6255	8249	9163	5664	3385	6854	9132	8538	2636	3665	5460	8600	7562	6632
MSTRG.5013	LOC100159668	uncharacterized LOC100159668	3668	4102	418	179	195	4063	2196	753	227	80	3682	1809	349	221	167
MSTRG.16411	LOC100166226	serine/threonine-protein kinase N2-like	3666	4256	3772	4878	4264	3376	3733	4200	4139	3641	2880	2674	3628	3457	4235
MSTRG.13533	LOC100165658	e3 SUMO-protein ligase PIAS2-like	3660	4264	4415	5560	4154	3060	3692	4568	4981	2978	2983	3078	4335	3924	4096
MSTRG.21784	LOC100166679	splicing factor 1-like	3659	4816	5427	3758	4998	3157	2118	4977	3544	3673	3913	3654	5765	2922	4825
MSTRG.22134	LOC103308647	#N/A	3659	6508	9223	15563	7649	3269	5621	11620	14706	3676	3377	4494	5833	11923	11064
MSTRG.19279	LOC100161003	uncharacterized LOC100161003	3659	3795	3381	2904	3198	3349	3351	3579	2435	2509	3196	2830	3360	2254	3107
MSTRG.14716	LOC100159583	golgi-specific brefeldin A-resistance guanine nucleotide exchange factor 1-like	3657	3349	3200	4913	3676	3080	2865	3738	3876	2375	2664	2361	2666	3089	3271
MSTRG.7185	LOC100159136	uncharacterized LOC100159136	3652	4709	5414	7961	5245	3069	3908	6336	7803	3160	3276	3626	4185	6783	6081
MSTRG.11002	LOC100164165	serine/threonine-protein phosphatase PP1-beta catalytic subunit-like	3651	5444	5928	7193	5347	3786	5172	5968	7136	2850	4222	4263	4374	5240	4975
MSTRG.11948	LOC100166512	28S ribosomal protein S15, mitochondrial-like	3648	3057	3616	5489	4393	3131	3510	3724	5916	2480	2729	3809	3417	4609	4352
MSTRG.5974	LOC100569716	regulator of nonsense transcripts 1-like	3646	4208	4001	4013	3562	3286	4060	4438	3753	2759	3043	3061	4638	3376	4231
MSTRG.12977	LOC100169623	mRNA export factor-like	3645	4646	5879	8111	5610	3010	4240	5960	7644	2778	3459	4303	5612	6493	6009
MSTRG.18070	LOC103309265	#N/A	3643	3884	3139	3518	4278	3231	3282	3031	3406	473	3567	3121	3562	3135	3276
MSTRG.12241	LOC100163186	nuclear protein localization protein 4 homolog	3641	4260	4495	6390	5220	3179	3447	4694	6217	2858	3233	3074	4065	5428	5278
MSTRG.21229	LOC100161152	interferon-inducible double stranded RNA-dependent protein kinase activator A-like	3640	3352	3201	5095	3883	2895	2532	3960	4293	2440	2462	1887	2983	3517	3861
MSTRG.3202	LOC100160097	alpha-tocopherol transfer protein-like	3640	3953	2095	1491	5460	3569	4001	3817	1535	10176	5066	2622	1927	1649	2579
MSTRG.17299	LOC100169075	limkain-b1-like	3640	2688	1137	779	838	2717	1667	1345	608	571	1965	1393	906	427	690
MSTRG.6761	LOC100160356	putative fatty acyl-CoA reductase CG5065-like	3639	1795	1067	110	352	3882	2581	2648	62	1266	12636	3833	702	125	314
MSTRG.7417	LOC100159351	platelet glycoprotein V-like	3639	4301	3748	5646	6499	4179	3388	3969	5498	6211	3553	2727	3637	4815	6177
MSTRG.3217	LOC100168323	arginyl-tRNA synthetase, cytoplasmic-like	3639	4301	4555	6328	4737	3725	3988	4877	6473	2564	3431	3649	4035	5301	4878
MSTRG.8605	LOC100167002	periodic tryptophan protein 2 homolog	3638	4143	4089	5315	3844	3242	3922	4590	5081	1939	3207	3705	4045	4187	4034
MSTRG.6666	LOC100168981	translocation protein SEC62-like	3637	3652	2464	3878	4094	3250	2800	2757	4149	3553	3627	3262	2033	3457	3686
MSTRG.9947	LOC100166175	uncharacterized LOC100166175	3635	4366	3693	5131	3907	3400	3403	4220	5265	2969	2925	2924	3388	4098	4359
MSTRG.21001	LOC100163953	39S ribosomal protein L16, mitochondrial-like	3633	3526	2894	4673	3810	2936	3101	2978	4627	2269	3086	3027	2408	4130	3841
MSTRG.15517	LOC100169336	probable 28S ribosomal protein S26, mitochondrial-like	3631	3731	2702	3265	3256	3241	3215	2937	2788	2258	3465	3446	2616	2811	2835
MSTRG.13979	LOC100163790	FGGY carbohydrate kinase domain-containing protein-like	3628	3010	2471	1603	1042	3569	3334	1889	1686	446	3415	3171	2180	1675	1134
MSTRG.12375	LOC100160609	ras-related protein Rab-10-like	3624	3739	2570	3828	3044	3189	3197	2633	3979	2914	2957	2871	2589	3611	3277
MSTRG.5491	LOC100167343	gamma-glutamyl hydrolase-like	3620	3386	1958	2142	1373	3015	2955	2004	2395	979	3311	2755	1128	1991	1383
MSTRG.11397	LOC100164230	RNA-binding protein MEX3B-like	3619	3286	2586	1680	1621	2737	3302	3043	1278	1529	2404	1711	2396	1069	1957
MSTRG.20602	LOC103308890	#N/A	3619	3862	3144	5206	4913	3157	3388	3533	5897	3187	3531	3835	2553	4852	4376
MSTRG.12276	LOC100166137	n-alpha-acetyltransferase 35, NatC auxiliary subunit-like	3618	3498	3496	4828	4184	2916	2940	3561	4979	3203	2697	2787	3105	4314	4300
MSTRG.12366	LOC100164082	calcium uptake protein 1 homolog, mitochondrial	3618	3148	2850	4632	4712	3486	2839	3098	4308	2976	3338	3085	2454	3381	4631
MSTRG.18227	LOC100167495	e3 UFM1-protein ligase 1 homolog	3616	3763	3088	5297	4245	3392	3233	3479	5206	2713	3251	3275	2397	4532	4187
MSTRG.15722	LOC100162106	poly(rC)-binding protein 3-like	3615	5179	6191	5211	6415	2220	4812	3936	4800	4077	3305	3739	6127	5947	5712
MSTRG.974	LOC100163789	mitochondrial import inner membrane translocase subunit TIM44-like	3614	3401	2789	4158	3356	3208	2878	2965	4324	2251	3202	3072	2223	3540	3551
MSTRG.7333	LOC100162954	uncharacterized LOC100162954	3608	2772	1706	1227	2465	3518	3638	2129	1079	2134	4537	2129	1859	724	3173
MSTRG.178	LOC100159991	legumain	3606	347	521	387	363	3393	858	542	887	488	3687	1772	1145	466	362
MSTRG.7041	LOC100167385	neuroglian-like	3601	5267	6340	8985	5952	3723	5083	7329	6467	3837	3274	2811	6082	4944	7851
MSTRG.4873	LOC100160256	huntingtin-interacting protein K-like	3601	4388	4116	5617	4926	2702	3797	4313	6138	2673	3430	3952	3701	5296	4443
MSTRG.6849	LOC100168351	TAR DNA-binding protein 43-like	3601	5334	5235	4952	4303	3321	4633	5315	4645	3335	3349	3741	5249	3542	4248
[truncated: 29,917 more rows]

## Sheet: raw_transcript_count_matrix
transcript_id	LOC#	gene name	F1_1	F1_2	F1_3	F1_4	F1_YA	F2_1	F2_2	F2_3	F2_4	F2_YA	F3_1	F3_2	F3_3	F3_4	F3_YA
rna-XM_029489013.1	LOC100167942	uncharacterized LOC100167942	122	0	39	224	0	195	104	0	1	1	116	236	61	0	0
rna-NM_001162253.2	Tmem41a	transmembrane protein 41A	1252	1065	1000	987	1139	1032	966	944	897	707	1057	1095	1065	855	1160
MSTRG.15724.1	#N/A	#N/A	0	2	0	0	0	5	1	0	0	0	0	13	0	2	0
rna-XM_016807243.2	LOC100574155	uncharacterized LOC100574155	0	35	0	0	0	103	40	0	0	0	70	32	35	114	134
MSTRG.22509.1	#N/A	#N/A	13	4	5	6	4	3	3	8	5	4	2	9	2	5	4
rna-XM_001951857.5	LOC100164804	WD repeat domain phosphoinositide-interacting protein 3-like	888	8	654	1060	9	5	6	758	7	548	1017	459	556	11	11
rna-XM_001947664.5	LOC100163367	melanotransferrin-like	1117	1140	1402	1978	1581	560	1160	1206	2031	903	929	616	1026	1673	1713
rna-XM_029491245.1	LOC100571594	uncharacterized LOC100571594	0	0	0	0	0	0	2	0	0	0	0	0	0	0	0
MSTRG.12423.6	#N/A	#N/A	411	2	0	1211	0	1	509	0	0	0	3	0	1	0	0
rna-NM_001293422.1	LOC100159845	26S proteasome non-ATPase regulatory subunit 14-like	10034	12992	13367	17185	13544	9380	12003	13742	17350	8774	9421	10319	12448	14277	13444
rna-XM_008189094.2	LOC100161415	acidic leucine-rich nuclear phosphoprotein 32 family member A-like	3922	5152	4190	2286	3354	3148	4338	4627	1344	2612	3524	3639	4107	1411	2680
MSTRG.11041.3	#N/A	#N/A	3	0	0	1	1	0	8	0	12	0	0	0	3	0	7
MSTRG.11041.2	#N/A	#N/A	8	5	34	28	8	2	1	36	36	14	12	18	41	22	19
MSTRG.11041.1	#N/A	#N/A	0	1	1	22	0	0	1	1	1	0	0	0	1	1	1
rna-XM_029487104.1	LOC100169632	uncharacterized LOC100169632	0	0	0	0	0	0	0	0	0	0	0	0	0	0	0
MSTRG.11041.6	#N/A	#N/A	10	15	7	14	9	0	9	26	7	5	7	1	18	9	10
MSTRG.11041.5	#N/A	#N/A	5	14	32	16	1	1	7	39	11	31	0	18	19	49	14
MSTRG.11041.4	#N/A	#N/A	3	1	1	16	37	0	4	1	28	1	1	1	7	1	6
MSTRG.7407.1	#N/A	#N/A	33	33	37	53	29	22	23	41	54	39	17	33	23	55	42
MSTRG.16187.14	#N/A	#N/A	0	0	0	481	27	3	0	9	3265	57	0	0	32	73	90
MSTRG.7407.3	#N/A	#N/A	45	8	18	75	13	0	15	49	99	5	4	35	0	25	5
MSTRG.7407.2	#N/A	#N/A	24	35	0	58	17	20	19	32	44	19	17	41	29	30	33
MSTRG.16187.11	#N/A	#N/A	22	149	21	2	0	94	291	441	2	1922	0	259	158	0	2524
MSTRG.7407.4	#N/A	#N/A	19	0	4	5	3	3	1	2	3	1	2	3	4	3	2
MSTRG.16187.13	#N/A	#N/A	9	1	88	95	3876	6	232	9	3	5	1	0	1	18	19
MSTRG.16187.12	#N/A	#N/A	46	0	79	822	0	0	0	0	52	0	0	0	367	0	0
rna-XM_016800813.2	LOC100162254	uncharacterized LOC100162254	8	15	11	8	48	6	11	3	5	6	16	12	2	5	23
MSTRG.3188.7	#N/A	#N/A	0	0	0	12	0	0	0	83	4	0	0	0	0	17	0
MSTRG.3188.6	#N/A	#N/A	1	29	25	184	80	2	11	3	191	3	4	3	42	218	56
MSTRG.3188.5	#N/A	#N/A	0	0	0	147	0	0	0	0	24	0	0	0	0	20	182
rna-XM_001952759.5	LOC100160136	small subunit processome component 20 homolog	314	3303	3522	26	3334	1912	3044	3667	4304	2162	420	2397	2725	3978	3353
MSTRG.3188.3	#N/A	#N/A	6	2	9	5	11	2	0	25	6	0	4	0	3	90	16
rna-NM_001293325.1	LOC100166657	ferritin heavy polypeptide-like 17-like	1610	627	432	2657	4483	2014	434	2796	1418	2985	1823	388	2650	2972	3053
rna-XM_029489300.1	LOC100161661	kinesin-II 85 kDa subunit-like	0	0	0	0	5	0	0	1	0	1	12	2	211	0	0
rna-XM_016800280.2	LOC100160176	possible pseudogene or miscRNA, No KEGG entry	0	0	0	0	0	0	0	0	0	0	0	0	0	0	0
MSTRG.3188.8	#N/A	#N/A	0	0	0	0	0	0	0	0	0	21	0	0	0	0	0
MSTRG.14580.1	#N/A	#N/A	156	59	7	7	5	156	44	8	4	8	207	82	2	2	7
MSTRG.3488.1	#N/A	#N/A	32	28	6	3	23	20	21	12	0	4	46	12	3	4	18
rna-XM_001950296.5	LOC100160005	splicing factor U2af 38 kDa subunit-like	70	86	446	237	218	88	125	225	122	146	148	278	352	98	339
rna-NM_001162596.2	LOC100159466	signal recognition particle 14 kDa protein-like	1378	1639	1582	2758	2262	1049	1516	1852	3122	1001	1253	1707	984	2555	2141
rna-XM_001944511.5	LOC100167821	general vesicular transport factor p115-like	350	2036	2216	455	2927	214	141	2620	2102	473	2317	2177	2376	63	2172
rna-XM_029488955.1	Kcmf1	potassium channel modulatory factor 1	114	88	95	141	90	84	122	92	176	153	102	65	74	97	87
rna-XM_001950648.5	LOC100168782	protein takeout-like	709	1157	1721	2654	3456	800	804	1995	2158	5565	1492	1162	2631	2326	3805
MSTRG.19841.1	#N/A	#N/A	0	8	1	917	0	0	372	0	0	1	0	0	0	0	15
MSTRG.4476.1	#N/A	#N/A	0	3	0	16	0	0	0	6	4	0	2	0	0	0	0
MSTRG.13892.1	#N/A	#N/A	2	0	0	0	0	7	0	0	0	12	0	0	0	0	0
MSTRG.2588.1	#N/A	#N/A	76	98	119	5	345	69	109	175	327	202	62	50	162	275	295
rna-XM_001944418.5	LOC100162115	FMRFamide receptor-like	27	0	0	38	62	43	3	5	14	20	36	28	4	9	30
rna-XM_008184791.3	LOC100159159	histone-lysine N-methyltransferase SETD1B-like	0	13	19	19	29	18	40	94	15	41	13	13	2	20	193
rna-XM_001944505.5	LOC100162513	UPF0464 protein C15orf44 homolog	910	1183	1461	1505	1474	610	1153	1341	2126	978	549	936	1386	1970	1259
rna-XM_029490379.1	LOC115034234	#N/A	0	0	0	0	0	0	0	0	0	0	0	0	0	0	6
MSTRG.22219.1	#N/A	#N/A	7	3	12	37	5	4	3	11	31	30	0	2	2	25	20
rna-XM_003247846.4	LOC100568742	uncharacterized LOC100568742	24	17	20	18	25	8	0	0	77	10	32	17	27	27	2
MSTRG.19841.4	#N/A	#N/A	303	327	41	295	947	0	446	856	772	357	0	636	474	462	574
rna-XM_016800722.2	LOC100168688	short transient receptor potential channel 5-like	0	0	0	6	6	2	0	2	0	0	0	0	2	4	0
rna-XR_003839962.1	LOC115034632	#N/A	0	0	0	0	0	0	0	0	0	0	0	0	0	0	0
MSTRG.17747.1	#N/A	#N/A	79	178	199	353	254	67	115	185	255	128	91	132	107	312	240
MSTRG.18103.1	#N/A	#N/A	1	0	0	13	2	3	1	0	0	2	0	9	6	3	2
MSTRG.24787.1	#N/A	#N/A	4	7	6	0	0	5	0	0	0	0	0	12	0	4	0
rna-XM_008191337.3	LOC100571564	uncharacterized LOC100571564	0	0	0	0	1	0	0	0	0	0	0	0	2	0	0
rna-XM_003247223.4	LOC100572349	uncharacterized LOC100572349	0	0	0	0	0	0	0	0	0	0	0	0	0	0	0
MSTRG.24782.1	#N/A	#N/A	6	13	14	10	11	8	14	12	5	2	6	15	8	8	2
MSTRG.16084.1	#N/A	#N/A	20	26	0	0	0	15	17	0	248	0	48	38	0	246	0
rna-XM_001951026.5	LOC100161842	uncharacterized LOC100161842	56497	75387	78653	104373	75056	48598	69542	82272	103420	46988	54990	72121	72956	92425	76373
rna-XM_001952745.5	LOC100159663	membrane metallo-endopeptidase-like 1-like	62	47	0	34	117	54	36	90	32	22	97	25	39	22	43
rna-XM_001950060.5	LOC100160368	spectrin beta chain-like	2639	2460	2317	1180	3042	2448	1556	2169	840	1356	1711	1439	1461	495	2068
MSTRG.1547.1	#N/A	#N/A	1104	463	253	318	325	676	441	277	295	382	601	588	215	351	309
rna-XM_029488264.1	LOC107884694	#N/A	0	0	0	0	0	0	0	0	0	0	0	0	0	0	0
MSTRG.22689.1	#N/A	#N/A	68	37	37	57	52	58	51	29	43	35	38	35	20	53	42
rna-XM_029485985.1	LOC107882149	#N/A	80	1	0	1	150	0	59	25	0	0	0	0	57	0	0
MSTRG.3476.1	#N/A	#N/A	74	108	6	18	70	94	67	31	0	10	55	43	4	23	35
rna-XM_001948145.5	LOC100169076	vacuolar protein sorting-associated protein 52 homolog	8	78	0	0	0	0	0	3	1144	0	0	0	0	0	0
MSTRG.16703.3	#N/A	#N/A	15	28	21	52	72	27	14	0	66	0	0	11	0	0	52
rna-XM_016804017.2	LOC100570333	uncharacterized LOC100570333	0	0	0	26	0	0	25	27	48	0	0	30	0	0	0
MSTRG.16703.1	#N/A	#N/A	81	66	32	103	110	66	20	41	170	65	48	38	32	138	107
rna-XM_016809298.2	LOC100159977	chromatin-remodeling complex ATPase chain Iswi-like	151	111	107	222	45	65	93	202	269	62	69	137	55	203	150
rna-XM_001952565.5	LOC100166680	ion transport peptide-like	1360	848	401	687	605	1391	1156	733	677	1112	1456	682	489	630	728
MSTRG.19367.1	#N/A	#N/A	0	0	0	0	7	0	0	0	0	0	45	0	0	0	0
MSTRG.22708.1	#N/A	#N/A	60	61	43	44	31	41	64	49	32	74	39	44	11	47	46
MSTRG.23181.1	#N/A	#N/A	7	13	10	9	16	19	7	8	13	11	4	1	11	3	8
rna-XM_008189565.3	LOC100576041	protein CIP2A-like	0	0	0	0	0	0	0	0	0	603	0	6	0	0	0
rna-XM_029490130.1	LOC100573630	uncharacterized LOC100573630	0	73	57	10	47	3	8	67	101	0	5	27	62	0	56
MSTRG.3260.1	#N/A	#N/A	0	0	0	0	3	9	0	0	17	0	0	0	0	5	11
MSTRG.154.1	#N/A	#N/A	5	0	0	6	6	0	0	0	5	16	0	0	0	0	2
rna-NM_001163065.1	LOC100302406	uncharacterized LOC100302406	2507	3125	2475	3699	4276	2208	2493	2888	115	2791	2704	2608	2618	3500	3732
MSTRG.1859.2	#N/A	#N/A	0	84	9	93	98	30	89	99	116	71	0	126	200	181	129
rna-XM_016804762.2	LOC100167155	N-alpha-acetyltransferase 80, n-acetyltransferase 6-like	26	0	0	33	24	37	0	0	0	0	0	0	0	0	0
rna-XM_001950693.3	LOC100159660	zinc finger protein 624-like	2964	3473	3666	6414	5120	2784	2750	4007	5601	4944	2565	2402	2511	4758	5485
MSTRG.16187.15	#N/A	#N/A	0	0	946	0	0	0	0	0	563	0	0	2	0	0	0
MSTRG.11400.1	#N/A	#N/A	0	0	0	520	0	0	0	0	0	0	0	0	0	0	0
rna-XR_003839456.1	LOC100569789	uncharacterized LOC100569789	104	0	0	0	0	0	0	0	0	0	0	59	0	0	0
rna-XR_510386.3	LOC103308280	#N/A	0	0	2	4	2	0	5	5	5	0	0	0	0	9	1
rna-NM_001293337.1	LOC100161553	putative sulfiredoxin-like	854	749	267	352	539	697	706	369	433	535	546	835	319	653	392
MSTRG.20162.2	#N/A	#N/A	3	0	1	0	0	1	0	0	0	27	3	0	0	0	0
rna-XM_016801106.1	LOC100574260	n-acetyltransferase ESCO2-like	3050	1868	792	997	1170	2466	1186	784	981	619	1811	1432	605	1057	1141
MSTRG.16187.16	#N/A	#N/A	860	0	829	2770	0	0	0	0	969	0	0	0	628	0	0
MSTRG.18113.1	#N/A	#N/A	0	0	0	0	0	0	0	0	570	0	0	0	0	0	0
rna-XM_001942481.5	LOC100165267	uncharacterized LOC100165267	1250	1990	1118	671	1036	1315	1386	1238	529	1176	1238	1014	1232	455	1029
rna-XR_001680191.2	LOC107884864	#N/A	36	11	3	6	16	9	8	0	5	18	24	11	23	28	15
rna-XM_016807374.2	LOC107884688	#N/A	0	0	0	0	0	0	0	0	0	0	6	0	0	0	0
rna-XM_008185862.3	LOC100568564	chromobox protein homolog 3-like	0	41	0	0	0	31	0	0	0	0	0	0	0	0	0
MSTRG.23902.1	#N/A	#N/A	7	8	0	17	9	0	11	11	21	9	0	3	2	23	29
rna-NM_001246098.2	LOC100165764	microsomal glutathione S-transferase 1-like	6	2	7	20	46	17	2	12	7	27	32	5	0	5	46
rna-XM_008185334.3	LOC100166166	annexin-B9-like	341	256	81	206	161	389	166	142	236	134	163	199	112	177	180
MSTRG.1557.1	#N/A	#N/A	0	3	0	1	0	0	0	0	0	0	0	0	0	13	0
MSTRG.2381.1	#N/A	#N/A	0	5	11	34	8	4	2	16	28	25	0	12	0	28	18
MSTRG.17339.2	#N/A	#N/A	0	0	737	0	0	0	0	0	0	0	0	0	0	1421	0
rna-XR_510967.2	LOC103310162	#N/A	0	7	3	9	12	0	6	9	29	10	5	7	5	15	36
rna-XR_003838869.1	LOC103310602	#N/A	2	4	8	0	20	1	0	19	23	0	7	6	4	0	1
MSTRG.16758.1	#N/A	#N/A	215	0	0	0	0	0	0	0	92	274	0	0	162	0	0
rna-XM_016804633.2	LOC100164891	uncharacterized LOC100164891	248	301	3	460	258	227	3	3	415	128	66	245	90	349	0
MSTRG.21978.4	#N/A	#N/A	99	193	576	33	1169	88	644	917	672	51	453	413	598	280	10
rna-XM_001943701.5	LOC100161310	proton-coupled folate transporter-like	1379	2051	898	534	776	1335	1640	1058	517	562	1653	1205	613	398	723
MSTRG.23485.1	#N/A	#N/A	5	7	13	17	7	8	11	0	9	38	22	25	14	14	11
rna-XM_029485999.1	LOC107882425	#N/A	4	0	0	0	0	0	0	0	0	0	0	0	0	0	0
rna-XM_016801505.2	LOC100159232	eukaryotic translation initiation factor 4 gamma 3-like	320	0	311	0	255	0	0	0	0	0	2	0	1153	0	0
MSTRG.21978.3	#N/A	#N/A	906	907	2650	1269	498	1051	576	702	417	341	1724	369	1920	1078	1072
MSTRG.23635.1	#N/A	#N/A	59	48	35	35	11	40	35	50	47	0	0	30	33	30	17
rna-XM_016807302.2	LOC100163708	RING finger protein 26-like	87	0	21	45	36	23	0	0	0	116	123	0	138	34	0
MSTRG.23908.1	#N/A	#N/A	4	21	2	28	8	34	6	9	18	20	25	7	12	38	18
rna-XM_008183127.3	LOC100169468	tachykinin-like peptides receptor 99D-like	0	0	0	0	124	0	0	0	0	0	0	0	0	95	0
rna-XM_003240744.4	LOC100573222	decorin-like	4	19	0	16	8	0	5	9	4	7	20	4	0	11	9
rna-NM_001161999.2	LOC100161081	cuticular protein CPG12-like	1220	3182	1480	622	915	1391	3412	1722	311	969	3748	1990	1199	291	760
rna-XM_003246262.4	LOC100573514	uncharacterized LOC100573514	2322	2364	3238	3475	2188	2003	2001	3327	2655	1244	1671	1297	2315	1919	2690
rna-XM_001948557.4	LOC100165130	active transporters; equilibrative nucleoside transporter; similar to AGAP003892-PA	3872	5528	6279	10640	6728	2906	4793	6910	10357	3590	3419	3234	4153	6874	7540
rna-NM_001163933.1	LOC100159560	Cystathionase-like	5517	2423	1075	5465	2314	4112	3374	922	710	316	2759	2905	7493	739	1114
MSTRG.10455.1	#N/A	#N/A	0	0	0	21	3	0	3	0	10	4	5	3	0	18	9
MSTRG.14469.1	#N/A	#N/A	73	99	99	53	85	71	85	86	55	29	75	75	74	40	51
rna-XM_001948676.5	LOC100164899	alanine aminotransferase 2, Asparaginase	440	3706	2534	227	337	444	44	323	460	1106	231	954	502	200	504
rna-XM_008185447.3	LOC100571582	eukaryotic translation initiation factor 3 subunit B-like	109	0	93	72	0	0	115	0	0	0	122	137	77	0	93
rna-XM_001944158.5	LOC100169010	serine/threonine-protein kinase Nek7-like	104	60	53	56	82	74	55	47	76	95	73	54	37	62	68
MSTRG.7161.8	#N/A	#N/A	159	0	217	73	81	469	6	269	1157	179	745	218	302	41	15
rna-XM_016801285.2	LOC100165632	regulating synaptic membrane exocytosis protein 2-like	0	0	0	0	0	0	0	0	0	0	0	0	0	0	0
rna-XM_016805598.2	LOC100166356	exportin-4-like	0	0	0	0	0	0	295	0	0	0	0	0	0	0	0
MSTRG.20154.1	#N/A	#N/A	141	180	57	82	72	113	111	59	70	36	143	106	52	54	52
rna-XM_001952765.5	LOC100160807	uncharacterized LOC100160807	94	90	109	9	95	101	14	33	56	126	156	92	88	185	431
rna-XM_016803304.2	LOC100160619	t-box transcription factor TBX10-like	0	0	19	28	5	160	40	11	4	17	29	41	0	78	16
rna-XM_003241498.4	LOC100166437	#N/A	0	422	0	0	0	0	0	1012	0	19	0	0	7	0	0
rna-XM_008182943.3	LOC100169369	prefoldin subunit 6-like	899	870	932	1546	1112	718	832	1018	1368	337	657	723	700	1076	1485
MSTRG.7161.7	#N/A	#N/A	95	473	5	217	60	410	0	0	15	0	0	36	0	0	226
rna-XM_029491908.1	LOC115034596	#N/A	0	0	0	0	0	0	0	0	0	0	0	0	0	0	0
rna-XM_008187449.3	LOC100168732	transcription factor HNF-4 homolog	1884	1658	503	536	560	1324	848	868	129	695	983	536	604	509	485
MSTRG.18184.1	#N/A	#N/A	21	21	4	21	0	9	5	3	6	4	3	5	0	11	4
MSTRG.17567.1	#N/A	#N/A	0	0	0	0	17	0	0	0	0	0	0	0	0	0	0
MSTRG.13535.1	#N/A	#N/A	3	18	2	5	6	4	11	0	4	0	0	5	3	10	0
rna-XM_008181493.3	LOC100165975	protein TANC2-like	491	22	581	0	0	11	0	0	23	673	18	0	487	17	25
MSTRG.20956.7	#N/A	#N/A	158	135	165	0	0	109	127	103	520	0	0	0	160	340	134
MSTRG.3188.1	#N/A	#N/A	30	63	101	0	184	44	56	111	216	177	58	73	95	0	0
rna-XM_008191762.1	LOC103311923	#N/A	0	0	0	0	0	0	0	0	0	0	0	0	0	0	0
rna-XM_008191016.3	LOC100159152	proton-coupled amino acid transporter 4-like	581	1064	723	738	318	756	778	280	8	1128	686	562	57	0	694
MSTRG.19364.1	#N/A	#N/A	25	17	40	26	15	44	24	42	56	16	23	16	11	40	32
rna-XM_008185600.3	LOC100167007	decaprenyl-diphosphate synthase subunit 1-like	1701	2024	1411	796	1327	952	780	1167	796	1207	966	1390	1083	465	1214
MSTRG.23198.1	#N/A	#N/A	49	52	75	461	242	41	38	119	353	288	35	64	89	375	230
MSTRG.18904.1	#N/A	#N/A	0	0	0	0	8	0	0	0	2	11	0	0	0	0	0
rna-XM_029491809.1	LOC100161171	RNA polymerase II-associated factor 1 homolog	239	662	337	929	704	485	673	936	711	293	188	1095	440	243	207
rna-XM_008184322.3	LOC100161765	profilin-like	667	2165	2020	2388	1044	751	903	2205	1860	1012	1472	1477	2176	1691	2282
rna-XM_003243897.4	LOC100161268	peroxisomal membrane protein PEX13-like	806	952	780	947	1095	618	661	999	982	406	636	537	986	1073	410
rna-XM_008189130.1	LOC103310532	#N/A	28	28	16	0	6	49	6	14	0	0	4	16	6	4	9
rna-XM_001942789.5	LOC100162769	DNA-directed RNA polymerase I subunit RPA12-like	703	951	1132	1418	1202	632	850	1061	1335	728	853	1050	1003	1220	1189
rna-XM_016808775.2	LOC100573056	uncharacterized LOC100573056	132	406	113	58	154	115	100	91	46	211	270	21	192	4	67
rna-XM_016806069.2	LOC100166117	myrosinase 1-like	0	0	0	0	22	0	0	0	0	0	0	0	0	0	0
MSTRG.9391.4	#N/A	#N/A	0	472	42	283	1	1	298	753	0	1	244	1	160	2	2
MSTRG.6392.9	#N/A	#N/A	0	0	26	0	0	0	0	0	0	0	0	0	0	0	0
MSTRG.6392.8	#N/A	#N/A	11	54	29	27	33	28	9	40	16	31	10	7	93	19	24
MSTRG.4143.1	#N/A	#N/A	2	12	12	29	24	8	9	22	33	11	14	14	11	23	30
rna-XM_029486771.1	LOC100164556	transient-receptor-potential-like protein-like	575	806	838	254	149	946	1243	831	173	343	966	706	718	234	135
MSTRG.18321.1	#N/A	#N/A	4	13	14	39	19	4	12	16	40	24	6	22	7	54	29
rna-XM_008180728.3	LOC100163968	serine protease inhibitor 4, serpin-4-like	240	76	33	0	143	189	49	16	88	166	98	56	39	97	78
MSTRG.6392.7	#N/A	#N/A	0	0	213	40	78	58	51	138	288	290	0	0	283	0	294
rna-XM_003243739.4	LOC100574587	protein halfway-like	655	0	66	871	498	376	546	625	779	241	0	297	0	794	989
MSTRG.6392.5	#N/A	#N/A	282	2	2	202	0	2	371	2	535	0	82	92	76	225	585
rna-XM_003240821.1	LOC100571566	IST1 homolog	106	57	121	164	128	101	163	145	125	39	146	67	134	75	131
MSTRG.14302.3	#N/A	#N/A	31	94	63	30	38	15	31	225	44	174	64	10	49	0	53
rna-XM_003243887.4	LOC100169090	protein phosphatase PP2A 55 kDa regulatory subunit-like	1639	2511	760	2812	806	2304	1713	806	750	1903	2573	3654	499	35	348
rna-XR_003840142.1	LOC115034945	#N/A	0	7	0	0	0	0	0	0	0	0	0	0	0	0	0
rna-XM_029491852.1	LOC115034555	#N/A	92	336	200	545	170	174	340	304	431	71	90	253	146	271	430
MSTRG.14302.4	#N/A	#N/A	33	3	0	11	0	44	0	4	0	170	0	0	0	12	56
MSTRG.336.1	#N/A	#N/A	133	148	54	88	84	168	72	38	51	33	84	75	23	99	85
MSTRG.22687.1	#N/A	#N/A	96	125	113	80	90	148	78	59	74	92	136	102	130	74	69
rna-XM_016804311.2	LOC100169399	uncharacterized LOC100169399	0	0	8	4	0	0	0	0	0	0	5	0	0	0	0
MSTRG.4160.1	#N/A	#N/A	3	0	0	0	13	0	0	5	0	0	0	0	4	5	0
rna-XM_008188692.3	LOC100165174	cGMP-specific 3',5'-cyclic phosphodiesterase-like	24	42	0	0	0	0	0	0	0	0	0	0	0	0	0
rna-XM_001951772.5	LOC100163788	abhydrolase domain-containing protein 4-like	1998	2256	1687	3301	3257	2172	1620	1904	3495	2573	1978	1826	1653	3255	3472
MSTRG.22706.1	#N/A	#N/A	9	3	0	0	4	12	5	5	25	7	0	8	0	19	8
rna-XM_008185314.3	LOC103309572	#N/A	7242	8549	7641	9654	10519	6267	7598	7709	9236	4245	6971	6576	7235	7401	8560
rna-XM_008180146.1	LOC103307819	#N/A	0	0	0	0	0	4	0	0	0	0	0	0	0	0	0
rna-XM_029489679.1	LOC100164063	ring canal kelch homolog	0	0	11	0	0	0	0	0	0	0	0	0	0	0	0
rna-NM_001293481.1	LOC100160175	RWD domain-containing protein 1-like	2134	2744	2654	4195	3673	2030	2695	2730	4557	1588	1695	2943	2072	4494	3892
MSTRG.12432.1	#N/A	#N/A	0	3	1	0	2	0	1	0	0	0	0	15	0	4	4
MSTRG.7426.1	#N/A	#N/A	0	0	4	24	9	0	0	0	1	9	4	0	4	8	4
MSTRG.14575.1	#N/A	#N/A	23	43	33	41	51	16	51	46	45	17	23	40	41	61	66
rna-XM_008186064.2	LOC103309771	#N/A	23	57	11	70	5	1	1	12	53	75	2	347	94	863	6
rna-XR_001680509.2	LOC100572303	possible pseudogene or miscRNA, No KEGG entry	0	0	0	0	10	0	9	10	7	0	14	0	0	8	0
MSTRG.16386.2	#N/A	#N/A	0	2	0	5	378	198	780	293	0	0	2	0	2	2	532
MSTRG.18111.1	#N/A	#N/A	11	0	2	0	0	0	0	8	0	1	15	0	0	0	0
MSTRG.23391.4	#N/A	#N/A	18	8	1	7	7	4	7	15	15	5	10	5	9	13	9
MSTRG.23391.5	#N/A	#N/A	2	0	151	0	0	0	0	1	0	0	0	0	0	0	0
rna-XM_008191230.1	LOC103311571	#N/A	0	0	0	0	0	0	0	0	0	0	0	0	0	0	0
MSTRG.23391.1	#N/A	#N/A	11	16	28	32	23	169	19	11	22	15	19	19	2	33	19
rna-XM_016801582.1	LOC100574480	possible pseudogene or miscRNA, No KEGG entry	0	0	0	0	0	0	0	0	0	0	0	0	0	0	0
MSTRG.8067.2	#N/A	#N/A	227	14	116	37	105	24	185	554	47	9	174	6	5	17	456
MSTRG.8067.3	#N/A	#N/A	769	58	366	218	1275	69	354	1756	214	13	266	65	103	177	1047
MSTRG.8067.1	#N/A	#N/A	242	0	0	0	0	16	29	0	5	0	0	0	0	0	0
rna-XR_510969.2	LOC103310162	#N/A	0	0	0	0	0	0	0	0	19	0	0	0	5	0	0
MSTRG.8067.7	#N/A	#N/A	262	383	292	232	335	286	0	138	211	0	0	169	283	164	0
MSTRG.8067.5	#N/A	#N/A	547	1085	472	268	77	841	198	44	902	578	88	852	644	180	91
MSTRG.9809.1	#N/A	#N/A	0	2	2	0	5	0	2	12	0	5	4	2	0	2	1
rna-XM_003247204.4	LOC100568537	uncharacterized LOC100568537	435	349	271	795	559	475	551	432	439	578	761	441	207	377	335
MSTRG.9384.5	#N/A	#N/A	209	0	262	0	0	138	3	91	0	1	0	0	1	0	0
rna-XM_029491828.1	LOC100569144	vacuolar protein sorting-associated protein 35-like	0	0	0	8	40	0	6	19	0	10	0	0	0	0	19
MSTRG.9384.2	#N/A	#N/A	0	0	102	1	0	0	0	0	0	0	0	0	0	0	0
rna-XM_001942580.5	LOC100165697	uncharacterized LOC100165697	1955	3691	1325	817	1311	1963	846	1796	722	4500	2042	1498	1246	755	1601
rna-XM_016808352.2	LOC100165100	uncharacterized LOC100165100	0	1	0	0	0	0	0	0	0	0	0	0	0	0	0
rna-XM_029488868.1	LOC100574162	AT-rich interactive domain-containing protein 4B-like	0	0	0	42	0	0	0	0	0	0	0	0	0	0	57
rna-XM_003245308.4	LOC100164607	transmembrane channel-like protein 7-like	103	23	33	544	472	165	22	70	280	0	118	16	75	287	327
MSTRG.18421.2	#N/A	#N/A	0	23	15	0	0	29	0	47	29	0	10	0	0	0	0
rna-XM_029485719.1	LOC100573267	uncharacterized LOC100573267	0	0	0	0	0	0	0	0	0	0	0	0	0	0	0
MSTRG.18421.1	#N/A	#N/A	125	245	95	125	74	38	116	96	106	43	52	145	67	115	82
MSTRG.4954.2	#N/A	#N/A	0	0	0	29	30	0	20	44	74	2	0	17	19	39	0
rna-NM_001246165.2	ACYPI47807	#N/A	373	538	727	1237	925	317	436	696	1101	403	381	390	475	873	914
MSTRG.3366.1	#N/A	#N/A	0	0	0	0	7	13	0	0	0	0	0	0	0	0	0
rna-XM_016806688.2	LOC100572631	uncharacterized LOC100572631	0	0	0	4	0	0	0	0	16	1	0	0	0	4	2
MSTRG.9825.23	#N/A	#N/A	3	7	10	45	282	18	37	15	16	28	15	394	8	183	58
rna-XM_008190219.3	LOC100160517	ATP-sensitive inward rectifier potassium channel 12-like, active transporters; similar to inwardly rectifying k+ channel	0	0	85	0	0	0	130	0	0	0	0	72	0	0	72
rna-NM_001161997.2	LOC100160944	nuclear cap-binding protein subunit 2-like	1518	1	1	2	10	138	11	1	1	39	2	1	27	1	1
rna-XM_016809278.2	LOC100165808	protein sevenless-like	708	691	0	389	364	0	0	0	191	0	0	0	215	0	0
MSTRG.24016.1	#N/A	#N/A	18	16	31	17	36	10	46	52	10	33	25	20	75	9	17
rna-XM_029488385.1	LOC100161758	NFX1-type zinc finger-containing protein 1-like	0	0	1	1	0	0	0	0	0	0	0	0	0	0	0
MSTRG.14941.12	#N/A	#N/A	187	239	5	186	149	206	290	74	214	158	212	257	0	151	109
rna-XR_003840049.1	LOC103309367	#N/A	0	0	0	183	1	0	19	5	37	0	0	0	0	150	0
rna-XM_029491290.1	LOC100573704	synembryn-like	0	0	0	0	18	0	0	0	0	0	0	0	0	0	0
rna-XM_029485722.1	LOC100575556	uncharacterized LOC100575556	0	0	0	0	0	0	0	0	0	7	0	0	0	0	0
rna-NM_001293383.1	LOC100159040	probable rRNA-processing protein EBP2-like	7287	8230	7028	9690	7574	5823	7571	7595	9664	3898	6649	8586	7612	8381	6380
MSTRG.21646.1	#N/A	#N/A	2	0	0	0	0	2	1	0	9	4	3	0	1	4	18
rna-XM_001947721.5	LOC100164761	protein HIRA homolog	401	857	874	908	1142	600	674	1230	958	381	320	47	932	790	1280
MSTRG.23927.1	#N/A	#N/A	0	0	0	0	0	0	0	0	0	9	0	0	0	0	0
rna-XM_003244263.4	LOC100571484	uncharacterized LOC100571484	62	66	34	65	34	52	38	37	43	29	54	56	33	43	45
rna-XM_016807640.2	LOC100166326	clusterin-associated protein 1-like	24	14	0	33	56	5	6	5	60	43	5	5	16	39	44
MSTRG.2263.1	#N/A	#N/A	4	18	6	4	13	2	2	16	11	10	1	3	14	3	0
gene-LOC100569368	LOC100569368	protein BCCIP homolog	0	0	0	0	0	5	0	0	0	0	0	0	0	0	0
rna-XM_008188325.3	LOC100569019	caspase-2-like	1168	1843	2243	3170	2208	1299	1106	1899	3099	1846	1493	1772	2486	2380	2316
rna-XM_029486827.1	LOC100167668	uncharacterized LOC100167668	0	0	6	6	3	4	0	0	3	1	0	0	4	0	1
MSTRG.16581.4	#N/A	#N/A	5291	0	0	0	384	4691	5494	3515	2897	0	0	4880	2351	0	0
MSTRG.17199.9	#N/A	#N/A	33	29	212	691	209	250	389	96	378	16	64	305	114	35	41
rna-XM_016802651.2	LOC100159368	SPARC-related modular calcium-binding protein 2-like	0	0	0	0	0	0	0	0	0	0	0	0	0	0	0
MSTRG.17199.7	#N/A	#N/A	0	0	0	174	0	0	0	241	185	0	272	0	0	266	184
MSTRG.17199.6	#N/A	#N/A	0	0	0	0	0	0	0	0	209	0	0	0	0	0	0
MSTRG.17199.5	#N/A	#N/A	20	0	0	0	0	250	0	0	1	0	0	0	0	0	0
MSTRG.17199.4	#N/A	#N/A	5	0	0	165	0	0	0	184	163	0	0	0	0	233	0
MSTRG.17199.3	#N/A	#N/A	0	0	395	184	45	0	154	199	174	0	0	25	0	242	0
MSTRG.2322.3	#N/A	#N/A	14	14	57	25	109	44	8	9	67	79	94	8	32	71	66
MSTRG.17199.1	#N/A	#N/A	115	17	15	166	2	44	176	80	100	1	0	24	23	17	17
rna-XM_003247586.4	LOC100166002	signal recognition particle 68 kDa protein-like	1198	2893	1659	2885	149	1527	1242	2950	2501	1645	1737	1918	1250	1073	2221
MSTRG.8599.1	#N/A	#N/A	85	27	2	0	4	161	35	13	0	2	130	52	6	5	10
MSTRG.7303.1	#N/A	#N/A	82	6	83	212	431	112	7	113	230	22	52	25	161	212	426
rna-XM_029489537.1	LOC100160411	solute carrier family 15 member 1-like	0	0	48	92	34	0	0	123	88	17	0	0	62	49	0
MSTRG.20352.1	#N/A	#N/A	2	15	2	13	3	4	8	9	4	12	0	18	7	0	1
rna-XM_008190902.1	LOC103311312	#N/A	0	0	0	0	0	0	0	0	0	0	0	0	0	0	0
rna-XM_016802419.2	LOC100167818	uncharacterized LOC100167818	201	17	18	0	4	195	17	10	0	8	26	7	0	0	173
MSTRG.23807.1	#N/A	#N/A	11	1	3	0	0	2	0	0	0	0	0	0	0	0	0
MSTRG.19770.4	#N/A	#N/A	108	132	163	100	277	70	64	59	122	14	199	54	266	68	105
MSTRG.19770.5	#N/A	#N/A	8520	12471	13092	17122	11747	8029	11575	12189	17416	4968	7089	8773	12249	12935	12801
MSTRG.24355.1	#N/A	#N/A	8	1	3	9	4	5	7	6	8	3	18	8	12	9	16
rna-XM_029489206.1	LOC100163553	two pore potassium channel protein sup-9-like	0	0	0	0	0	0	0	0	0	0	0	0	0	0	0
MSTRG.12502.1	#N/A	#N/A	0	0	0	0	0	0	0	0	0	0	45	0	0	0	0
MSTRG.10626.1	#N/A	#N/A	10	18	10	37	25	4	5	5	62	7	0	15	7	25	22
rna-XM_016804499.2	LOC100164700	dnaJ homolog subfamily C member 8-like	72	92	43	22	36	24	24	57	155	115	27	75	61	108	49
MSTRG.6607.4	#N/A	#N/A	78	595	0	1563	120	1	754	68	41	88	6	9	0	276	56
rna-XM_029492033.1	LOC107883948	#N/A	0	0	0	0	0	0	0	0	0	0	0	0	0	0	0
MSTRG.2950.2	#N/A	#N/A	13	17	7	171	231	17	15	71	211	141	12	37	14	199	89
rna-XM_001945007.5	LOC100161710	uncharacterized LOC100161710	61	73	212	281	442	185	0	235	217	247	58	1	169	161	167
rna-XM_003244627.4	LOC100574274	enkurin-like	29	12	34	24	37	12	25	7	25	25	6	14	7	39	54
MSTRG.8838.1	#N/A	#N/A	1245	896	509	512	608	937	680	447	436	472	1244	753	476	431	598
rna-XM_008185394.3	LOC100159778	glycogen phosphorylase-like	25918	42174	14267	12831	9639	21912	30688	24734	10356	9328	27109	20063	12782	13367	8881
rna-XM_029492194.1	LOC107885320	#N/A	0	0	0	3	0	0	0	0	0	0	0	0	0	0	0
MSTRG.6716.1	#N/A	#N/A	42	46	18	6	26	18	54	30	6	18	62	101	22	37	17
MSTRG.21693.10	#N/A	#N/A	0	0	0	0	1	0	325	0	0	0	1	0	0	0	0
rna-XM_016804485.2	LOC100162528	uncharacterized LOC100162528	11	6	7	0	0	12	16	0	5	0	0	24	0	13	9
MSTRG.6786.1	#N/A	#N/A	108	80	161	256	248	107	127	156	372	181	92	97	100	319	279
MSTRG.6786.2	#N/A	#N/A	36	21	28	33	42	29	16	43	11	41	6	137	17	26	20
MSTRG.7080.1	#N/A	#N/A	14	3	18	5	5	12	3	9	20	3	8	7	10	14	0
MSTRG.23937.1	#N/A	#N/A	0	0	0	0	0	4	0	0	0	0	2	0	0	25	0
MSTRG.5748.5	#N/A	#N/A	0	0	9388	0	10163	0	6616	2006	0	0	14734	0	0	0	0
MSTRG.5748.4	#N/A	#N/A	0	0	0	4560	0	0	0	642	0	0	272	0	0	6247	1896
MSTRG.5748.3	#N/A	#N/A	0	0	0	0	0	0	0	0	0	0	2807	0	0	0	0
MSTRG.5748.2	#N/A	#N/A	13814	13977	3220	8405	4616	13157	6663	6092	12534	6950	2822	12524	9023	7332	10085
MSTRG.2477.7	#N/A	#N/A	0	0	1	0	34	0	0	0	0	0	0	0	0	0	0
rna-NM_001204937.1	Zc3h15	zinc finger CCCH-type containing 15	7701	8958	9668	14115	11601	6854	8617	9978	14005	6888	6736	10007	8727	11895	11065
MSTRG.2477.5	#N/A	#N/A	31	46	25	112	92	11	26	78	146	59	9	9	45	66	129
MSTRG.2477.4	#N/A	#N/A	0	0	0	0	380	0	0	0	0	0	0	0	0	0	1
MSTRG.2477.3	#N/A	#N/A	708	769	1221	569	640	440	670	870	0	510	506	282	391	1731	1012
MSTRG.2477.1	#N/A	#N/A	26	20	36	877	4	13	33	33	1192	18	0	9	0	32	27
rna-XM_008186769.3	LOC100159234	RNA-binding protein fusilli-like	993	467	447	456	782	767	525	746	284	1375	249	1160	910	668	189
rna-XM_029489185.1	LOC100574854	uncharacterized LOC100574854	0	13	6	0	0	0	13	13	0	0	0	3	0	3	8
MSTRG.4825.1	#N/A	#N/A	736	155	1349	474	424	757	465	369	350	277	695	54	826	88	423
rna-XM_029486993.1	LOC100159683	6-phosphofructokinase-like	0	0	0	0	0	0	0	0	0	0	0	0	0	0	0
MSTRG.4825.4	#N/A	#N/A	0	0	1244	6	0	0	0	1	24	0	0	677	0	0	1
MSTRG.9813.5	#N/A	#N/A	0	58	94	129	34	471	42	140	0	79	0	232	167	594	70
MSTRG.9813.6	#N/A	#N/A	377	183	50	38	1	76	4	42	44	42	44	71	46	109	12
MSTRG.9813.7	#N/A	#N/A	7	0	0	5	10	0	0	0	563	0	662	67	0	0	0
MSTRG.7313.1	#N/A	#N/A	609	230	178	76	17	454	171	125	21	0	266	263	102	0	44
rna-XR_003839820.1	LOC115034464	#N/A	0	0	0	0	7	0	0	0	0	0	0	0	0	0	0
MSTRG.10486.1	#N/A	#N/A	9572	7075	2263	2956	3754	11218	4266	2698	3333	1145	7121	4486	2028	2129	4596
rna-XM_003240692.4	LOC100572260	uncharacterized LOC100572260	225	6	36	329	143	4	93	56	87	2	0	0	0	157	249
MSTRG.4964.1	#N/A	#N/A	68	116	305	857	753	317	176	353	919	194	484	476	188	784	522
MSTRG.4964.3	#N/A	#N/A	395	0	0	0	0	0	0	0	0	0	87	0	0	0	0
rna-XM_008191311.3	LOC100574194	uncharacterized LOC100574194	62	28	25	38	11	34	65	0	51	17	17	45	37	84	0
MSTRG.6946.1	#N/A	#N/A	14	35	12	46	41	59	16	20	44	9	7	20	8	20	53
MSTRG.10741.1	#N/A	#N/A	118	129	667	321	1473	103	498	1062	1950	774	1175	64	942	2583	144
MSTRG.3937.1	#N/A	#N/A	30	16	5	23	6	13	11	14	23	28	15	20	5	5	30
MSTRG.18409.1	#N/A	#N/A	0	8	0	0	0	0	83	10	0	0	0	6	0	0	0
MSTRG.18409.3	#N/A	#N/A	156	577	396	736	66	170	212	1550	366	261	184	365	43	155	684
MSTRG.18409.4	#N/A	#N/A	0	0	0	0	0	0	267	0	0	0	0	0	0	0	0
rna-XM_029485944.1	LOC100572375	uncharacterized LOC100572375	27	4	5	0	0	56	6	0	0	0	2	19	0	0	14
rna-XM_008187372.2	LOC100573106	sperm-associated antigen 6-like	0	0	0	0	0	0	0	0	0	0	0	0	0	0	0
rna-XM_016806931.2	LOC100166509	uncharacterized family 31 glucosidase KIAA1161-like	0	0	0	0	0	0	0	0	0	94	0	0	0	0	0
MSTRG.6617.1	#N/A	#N/A	25	9	26	58	26	13	35	11	90	10	11	23	17	12	28
MSTRG.24937.1	#N/A	#N/A	0	0	0	0	0	33	0	0	0	0	0	0	0	0	9
rna-XM_016806938.2	LOC100161134	integrin-alpha FG-GAP repeat-containing protein 2-like	1	0	0	1	1	0	0	6	1	0	80	1	0	0	32
rna-TRNAK-CUU-8	TRNAK-CUU	#N/A	0	0	0	0	0	0	0	1	0	0	0	0	0	0	0
rna-XM_008180239.2	LOC100169354	tRNA pseudouridine synthase A, mitochondrial-like	58	445	287	205	110	128	38	88	277	0	167	176	359	170	156
MSTRG.19809.1	#N/A	#N/A	5	0	0	32	6	5	0	0	5	7	3	2	0	23	16
rna-XM_001946523.5	LOC100159643	short stature homeobox protein 2-like	0	0	0	0	122	3	0	0	78	59	0	0	35	3	96
rna-TRNAK-CUU-4	TRNAK-CUU	#N/A	0	0	0	0	1	0	0	0	0	0	0	0	0	0	0
MSTRG.2669.1	#N/A	#N/A	2	0	2	9	8	14	0	0	19	0	0	0	0	4	2
rna-TRNAK-CUU-6	TRNAK-CUU	#N/A	0	0	0	0	0	0	0	0	0	0	0	0	0	0	0
rna-TRNAK-CUU-7	TRNAK-CUU	#N/A	0	0	0	0	0	0	0	1	0	0	0	0	0	0	0
rna-TRNAK-CUU-2	TRNAK-CUU	#N/A	0	0	0	0	0	0	0	0	0	0	0	0	0	0	0
rna-TRNAK-CUU-3	TRNAK-CUU	#N/A	0	0	0	0	0	0	0	0	0	0	0	0	0	0	0
rna-XM_029490658.1	LOC100570722	major facilitator superfamily domain-containing protein 6-like	0	203	286	101	72	0	0	303	66	0	39	0	152	176	137
rna-XR_003839675.1	LOC115034311	#N/A	0	0	0	0	0	0	0	0	0	0	2	7	0	0	0
MSTRG.14638.2	#N/A	#N/A	30	13	6	15	8	6	8	13	14	20	9	13	10	10	0
rna-XM_001943910.5	LOC100164329	uncharacterized LOC100164329	154	136	15	0	179	153	136	68	46	77	87	0	61	0	38
rna-XM_001942527.5	LOC100163993	UPF0586 protein CG11596-like	2293	2073	2214	3015	2396	1615	1775	2262	2918	1771	1378	1633	1851	2418	2711
rna-XM_016800265.2	LOC100166443	huntingtin-interacting protein 1-like	37	0	28	0	0	461	0	1	0	0	35	0	0	0	0
MSTRG.3755.1	#N/A	#N/A	2	1	3	6	11	2	16	3	6	4	0	0	3	4	3
rna-XM_029489700.1	LOC100167841	uncharacterized LOC100167841	1	0	0	0	0	0	0	0	0	0	0	0	0	0	0
rna-XM_016804659.2	LOC100160779	protein tweety-like	0	0	0	6	0	0	2	2	0	1	830	2	1	0	0
rna-XM_008188216.3	LOC100160792	succinate-semialdehyde dehydrogenase, mitochondrial-like	4631	4622	1043	2049	1324	4968	1441	2279	2028	1519	5962	2986	3873	2751	1260
rna-XM_029490356.1	LOC100167612	uncharacterized LOC100167612	0	0	0	0	0	0	0	0	50	0	0	0	0	0	0
rna-XM_029489303.1	LOC100167783	serine/threonine-protein kinase Doa-like	0	0	0	0	0	0	0	0	0	0	0	0	0	0	0
rna-XM_008190246.3	LOC100162861	uncharacterized LOC100162861	291	206	270	251	171	346	237	229	223	0	247	337	305	219	134
MSTRG.10301.1	#N/A	#N/A	7	0	0	0	2	8	0	0	0	14	1	0	0	1	0
rna-XM_001947529.5	LOC100166836	probable serine incorporator-like	2842	1146	64	496	490	623	71	139	629	411	243	310	1165	397	825
rna-XM_029487888.1	LOC100162908	#N/A	0	0	0	0	0	0	0	0	0	0	0	0	0	83	0
rna-XM_029489191.1	LOC100163553	two pore potassium channel protein sup-9-like	239	0	0	0	361	334	0	0	0	0	0	0	0	0	0
rna-XM_008187443.2	LOC103310148	#N/A	4	2	0	4	6	0	0	7	8	0	4	2	0	5	3
rna-XM_029485646.1	LOC103309912	#N/A	14	10	5	0	10	0	9	5	0	0	20	16	0	9	18
rna-XM_001945239.5	LOC100169564	SNW domain-containing protein 1-like	4220	5306	5370	3102	4018	2480	3517	3895	4006	4418	4569	4848	3658	2218	3069
rna-XM_016802218.2	LOC100573323	venom protease-like	0	0	0	0	0	130	0	0	0	0	0	0	0	0	0
MSTRG.6970.2	#N/A	#N/A	188	0	5	0	0	0	29	10	292	7	0	0	0	0	0
MSTRG.6970.5	#N/A	#N/A	519	0	0	686	15	0	12	1068	0	0	1265	0	0	504	0
rna-XR_003840004.1	LOC115034687	#N/A	0	0	0	0	0	0	0	0	0	0	0	0	0	0	0
MSTRG.4678.1	#N/A	#N/A	6	1	0	1	1	0	1	12	0	1	0	2	0	5	3
rna-XM_001946101.4	LOC100169179	uncharacterized LOC100169179	1500	1704	2326	3031	1996	1427	1808	2370	3117	1200	1434	1714	1500	2434	2293
rna-XM_016800271.2	LOC107882215	#N/A	5	0	0	0	0	8	0	0	0	0	0	0	0	4	0
MSTRG.18839.1	#N/A	#N/A	8	4	9	40	11	10	10	17	14	9	0	16	15	8	22
rna-XM_029492823.1	LOC115035139	#N/A	0	0	0	0	0	0	0	0	7	0	0	0	0	0	0
MSTRG.8300.1	#N/A	#N/A	2	8	8	7	3	0	1	0	6	22	0	1	5	15	3
MSTRG.11569.1	#N/A	#N/A	4	0	9	5	17	2	7	0	10	2	0	0	0	0	6
MSTRG.15342.4	#N/A	#N/A	0	81	46	129	145	74	1	51	178	0	0	1	59	133	236
MSTRG.15342.3	#N/A	#N/A	1	177	58	692	297	37	0	397	634	0	0	14	0	469	236
MSTRG.15342.1	#N/A	#N/A	48	74	101	111	166	102	71	62	137	56	349	1	0	85	146
rna-XM_008190217.1	LOC103310833	#N/A	0	3	0	5	0	4	5	0	0	0	0	0	0	0	0
rna-XM_029490934.1	LOC100162454	zinc finger protein 271-like	65	36	32	105	0	44	201	42	57	53	28	58	36	97	36
rna-XR_003840230.1	LOC107882446	#N/A	0	0	0	0	0	0	0	0	0	0	0	0	0	0	0
MSTRG.19815.1	#N/A	#N/A	855	1151	565	998	777	656	577	894	756	596	265	441	667	758	730
rna-XM_029488701.1	LOC100164097	uncharacterized LOC100164097	1699	967	252	522	551	856	670	270	282	738	916	480	604	11	276
MSTRG.19815.3	#N/A	#N/A	2503	644	3110	4878	4510	1891	3016	3126	4818	3419	1315	2172	3343	4382	4611
rna-XM_003245107.3	LOC100163711	uncharacterized LOC100163711	359	6	0	130	8	520	3	10	13	395	264	4	168	2	5
MSTRG.23929.1	#N/A	#N/A	48	25	68	59	40	38	78	41	0	57	82	73	76	60	30
rna-XM_001950988.5	LOC100162342	ras suppressor protein 1-like	1725	1969	1857	4424	3774	1643	1623	2229	4471	2679	1796	1658	1692	3982	4088
MSTRG.2675.1	#N/A	#N/A	0	11	4	0	6	0	1	15	1	7	0	1	0	2	0
rna-XM_008186157.3	Rab14	Rab-protein 14	153	520	623	143	828	179	120	281	230	277	207	498	618	137	264
MSTRG.23973.1	#N/A	#N/A	6	7	1	16	4	3	0	3	9	10	0	1	1	10	0
rna-XM_016804578.2	LOC100158802	sodium channel protein para-like	89	7	11	0	0	84	0	0	0	0	0	0	0	0	9
MSTRG.25467.1	#N/A	#N/A	12	22	14	8	5	0	4	6	0	15	2	8	0	6	7
rna-XM_008189746.2	LOC100162426	signal recognition particle 72 kDa protein-like	3508	4001	3376	4842	4017	2712	2799	3558	5163	2031	3097	3200	3225	4200	4390
MSTRG.1825.1	#N/A	#N/A	0	0	0	0	0	9	0	0	0	0	0	0	0	0	0
rna-XM_029491785.1	LOC100166736	uncharacterized LOC100166736	0	0	0	0	0	0	0	0	0	0	0	0	0	0	0
rna-XM_003242411.4	LOC100568791	tctex1 domain-containing protein 3-like	0	0	0	0	0	0	1	1	0	0	0	0	0	0	0
rna-XM_029489592.1	LOC100160420	uncharacterized family 31 glucosidase KIAA1161-like	5	0	0	0	0	34	0	0	19	996	4	18	4	4	13
rna-XM_001948319.5	LOC100165207	uncharacterized LOC100165207	83	209	323	243	424	78	365	239	341	274	306	293	92	180	261
MSTRG.21773.1	#N/A	#N/A	3	2	0	0	5	0	0	0	0	40	0	0	0	0	4
rna-NM_001293421.1	ACYPI32014	#N/A	209	197	273	513	505	225	239	353	868	228	221	154	187	548	587
rna-XM_029487956.1	LOC100158948	mothers against decapentaplegic homolog 4-like	0	3	162	97	282	0	0	0	246	0	2	0	184	50	123
rna-XM_008190691.1	LOC103311124	#N/A	0	1	7	3	4	3	2	3	3	0	3	3	1	7	3
rna-XM_029485974.1	LOC115033433	#N/A	214	293	135	89	163	253	174	151	103	156	254	206	122	121	138
rna-XR_003839300.1	LOC115033954	#N/A	0	1	0	0	0	0	0	0	0	0	0	0	0	0	0
rna-XM_008188399.3	LOC100572842	sialin-like	4	0	0	4	0	0	0	0	0	4	0	0	0	0	0
MSTRG.2104.1	#N/A	#N/A	1	4	11	1	0	8	13	10	11	5	13	5	7	6	0
MSTRG.18862.1	#N/A	#N/A	13	5	10	12	5	6	6	8	44	12	0	5	11	23	13
MSTRG.2495.4	#N/A	#N/A	0	0	0	0	0	0	0	0	0	0	0	0	0	0	491
MSTRG.2495.2	#N/A	#N/A	9	0	0	0	0	0	749	0	0	0	0	0	0	0	0
MSTRG.2495.1	#N/A	#N/A	610	917	76	69	27	674	120	41	12	942	593	630	60	1093	21
rna-XM_003246620.3	LOC100169304	bromodomain adjacent to zinc finger domain protein 1A-like	256	4503	839	5066	4488	342	3	6772	1992	1083	2806	387	175	2182	3602
rna-XM_008191441.1	LOC103311737	#N/A	306	130	94	64	54	297	151	114	67	82	233	115	119	47	81
rna-XM_008191499.1	LOC103311785	#N/A	0	0	0	0	0	0	0	0	0	0	0	0	0	0	0
MSTRG.7404.1	#N/A	#N/A	0	5	0	6	14	2	2	0	0	22	0	3	0	3	14
MSTRG.12153.3	#N/A	#N/A	7	0	0	0	0	0	0	0	0	4	0	17	0	0	0
MSTRG.2648.3	#N/A	#N/A	0	0	0	0	0	0	0	0	0	15	0	0	0	0	7
MSTRG.2648.2	#N/A	#N/A	0	27	0	0	2	0	0	23	8	1	0	0	8	5	4
MSTRG.2648.1	#N/A	#N/A	0	12	19	29	16	0	7	4	39	0	14	0	0	22	18
MSTRG.9451.3	#N/A	#N/A	18	1672	150	6	21	29	4	16	0	4	961	133	604	8	9
rna-XM_029487571.1	LOC100572814	ring canal kelch homolog	0	0	0	0	0	0	0	0	0	0	0	0	0	0	0
rna-XM_029487835.1	LOC100574389	mannan-binding lectin serine protease 1-like	521	0	157	0	0	0	0	0	0	0	308	0	0	46	0
MSTRG.7383.1	#N/A	#N/A	2	0	11	5	3	0	3	3	13	21	1	5	3	53	31
MSTRG.15640.1	#N/A	#N/A	8	4	5	20	4	6	0	0	1	10	0	3	0	4	0
rna-XM_029487200.1	LOC100165785	multiple PDZ domain protein-like	0	0	0	0	52	0	0	0	0	147	0	0	0	0	0
MSTRG.12789.1	#N/A	#N/A	36	93	61	398	121	38	75	102	657	91	34	73	33	672	219
rna-XM_029488008.1	LOC115033821	#N/A	0	0	0	0	0	1	0	0	9	0	0	0	0	0	0
rna-XM_008185030.3	LOC100575633	uncharacterized LOC100575633	46	52	60	0	66	106	57	6	47	26	153	35	0	23	26
rna-XM_008182821.1	LOC103308785	#N/A	0	0	0	0	0	0	0	0	0	0	0	0	0	0	0
rna-XM_008189579.3	LOC100167213	TBC1 domain family member 23-like	228	390	272	1017	1	0	259	175	0	1	255	294	0	315	2
rna-XM_008190079.3	LOC100161896	protein pangolin, isoforms A/H/I-like	12	41	39	96	237	45	0	27	113	57	37	23	104	73	103
MSTRG.18515.1	#N/A	#N/A	0	0	0	0	0	13	0	0	0	0	0	0	0	0	0
rna-XM_029487552.1	LOC100164509	valyl-tRNA synthetase-like	0	0	0	0	0	0	0	0	0	3	2	0	0	0	0
MSTRG.16418.10	#N/A	#N/A	1668	226	1586	1528	1259	0	1527	1227	2260	1805	0	1	5	1114	518
MSTRG.25032.1	#N/A	#N/A	0	0	0	1	0	12	0	0	0	0	0	0	0	0	0
rna-XR_003839083.1	LOC100573103	THAP domain-containing protein 2-like	29	29	46	62	0	0	0	8	94	90	136	47	0	60	21
MSTRG.15029.2	#N/A	#N/A	0	2	0	0	0	0	0	0	0	13	1	0	0	0	0
rna-XM_029487821.1	LOC100160373	uncharacterized LOC100160373	0	0	652	406	0	0	0	0	487	0	0	0	0	0	1525
MSTRG.13302.4	#N/A	#N/A	0	124	0	0	0	0	0	0	0	0	0	0	0	0	0
rna-XM_016806293.1	LOC100164063	ring canal kelch homolog	0	0	0	0	0	0	0	119	0	0	0	0	0	0	0
rna-XM_029489647.1	LOC100569551	uncharacterized LOC100569551	0	0	0	5	0	0	0	0	0	8	0	0	0	0	0
MSTRG.16703.2	#N/A	#N/A	5	13	24	78	67	21	16	17	0	0	22	77	67	0	61
rna-XR_003839961.1	LOC115034631	#N/A	0	2	0	0	2	0	0	0	5	0	0	0	0	3	7
MSTRG.5030.3	#N/A	#N/A	0	84	0	0	31	72	87	0	0	21	60	5	0	34	0
MSTRG.5030.2	#N/A	#N/A	227	116	0	0	0	0	0	0	0	0	113	59	0	0	0
rna-XM_029491186.1	LOC115034395	#N/A	606	578	215	96	104	606	271	200	80	8	499	273	189	50	87
rna-XM_029487960.1	LOC100161209	potassium voltage-gated channel subfamily KQT member 1-like	32	0	0	0	0	0	0	0	0	0	0	0	0	0	0
rna-XM_001944475.5	LOC100161078	ubiquitin thioesterase trabid-like	1261	1162	1027	853	1020	1205	855	1001	1182	832	973	565	814	803	1098
rna-XM_008190685.1	LOC103311119	#N/A	0	0	0	0	0	0	0	0	0	0	0	0	0	0	0
rna-XM_029486456.1	LOC115033609	#N/A	0	0	5	0	0	0	0	0	0	0	0	0	0	0	0
rna-XM_008181014.3	LOC100168088	#N/A	186	169	51	166	14	130	50	272	288	216	166	182	17	135	32
rna-XM_016806761.2	LOC103310208	#N/A	37	72	81	100	89	62	38	61	75	79	44	89	32	91	75
rna-XM_008181505.3	LOC100160464	kynurenine--oxoglutarate transaminase 3-like	268	3631	2741	2983	62	738	1220	690	923	474	850	1037	114	3412	41
MSTRG.24765.1	#N/A	#N/A	3	4	19	16	19	16	9	20	10	23	2	6	20	34	20
rna-XM_029490809.1	LOC107884164	#N/A	64	67	34	29	11	51	69	6	6	26	64	45	22	0	11
rna-XM_008190817.1	LOC103311239	#N/A	0	0	0	0	0	0	0	0	0	0	0	0	0	0	0
rna-XM_016801026.2	LOC100163978	e3 SUMO-protein ligase PIAS1-like	0	534	446	601	0	0	0	10	567	0	0	1	276	603	757
rna-XR_119084.4	LOC100571348	possible pseudogene or miscRNA, No KEGG entry	93	185	88	104	201	32	156	195	325	146	76	55	39	166	287
MSTRG.4221.1	#N/A	#N/A	0	0	0	0	0	0	0	2	2	14	0	4	0	0	1
rna-XM_029488769.1	LOC100159679	uncharacterized LOC100159679	427	298	237	329	195	247	79	0	645	194	208	270	296	0	509
rna-XR_510347.3	LOC100163062	hrp65 protein-like	7	6	358	2	0	0	0	0	0	2	0	330	0	0	2
rna-XM_001945398.4	LOC100163077	tubulin beta-1 chain-like	0	0	0	0	2	6	0	0	6	7	0	0	0	0	0
rna-XM_008187134.3	LOC100168098	uncharacterized LOC100168098	423	125	0	156	488	0	189	464	157	0	0	138	162	0	314
rna-XM_029486424.1	LOC115033591	#N/A	0	0	0	10	0	8	0	0	0	0	0	6	0	0	3
rna-XM_008182046.3	LOC100575904	uncharacterized LOC100575904	105	426	349	743	731	316	309	376	498	400	184	370	59	462	707
MSTRG.12795.1	#N/A	#N/A	0	4	0	7	0	0	0	3	4	0	0	10	2	7	2
rna-XR_003839409.1	LOC115034048	#N/A	0	0	2	4	0	0	0	0	3	0	0	2	1	8	0
rna-XM_029490815.1	LOC100167639	uncharacterized LOC100167639	0	0	0	0	0	0	0	0	0	0	0	0	0	0	247
rna-XM_008186854.3	LOC100168079	neurexin-4-like	0	0	0	0	2816	0	4	1	0	0	0	0	0	0	0
MSTRG.23663.22	#N/A	#N/A	36	55	28	0	0	76	0	0	83	11	0	103	0	0	94
rna-XM_001950690.5	LOC100159502	uncharacterized LOC100159502	209	73	8	0	892	0	44	39	481	436	299	0	33	331	611
rna-XM_008183153.1	LOC103308906	#N/A	0	0	0	0	0	0	0	0	0	0	0	0	0	0	0
rna-XM_008183948.2	LOC100161228	synaptic vesicular amine transporter-like	0	0	0	0	0	0	0	0	0	0	0	0	0	0	0
MSTRG.10956.1	#N/A	#N/A	53	83	86	55	121	8	19	15	46	10	21	9	69	21	22
rna-NM_001160351.1	Accoas	acetyl coenzyme A synthase	7966	3465	1363	1718	1116	6223	3443	1863	2022	1245	5499	3292	1899	1155	1437
MSTRG.10956.2	#N/A	#N/A	0	26	8	3	3	6	7	0	0	0	5	2	3	0	3
rna-XM_016802216.2	LOC100158792	alcohol dehydrogenase [NADP+]-like	688	1255	1141	1930	90	236	1591	1698	1659	15	989	227	10	3214	1388
MSTRG.22178.1	#N/A	#N/A	17	7	14	12	12	37	17	12	14	30	35	2	8	4	1
rna-XM_016801105.2	LOC100575129	uncharacterized LOC100575129	0	0	0	0	0	0	0	0	0	0	0	0	0	0	0
MSTRG.22703.1	#N/A	#N/A	14	15	6	10	12	26	3	12	13	6	8	9	2	22	18
rna-XM_029490512.1	LOC100162451	synaptosomal-associated protein 25-like	153	1	0	0	0	0	0	0	0	15	0	0	96	0	28
rna-XM_016801990.2	LOC107882894	#N/A	3	6	4	5	5	0	9	10	8	10	3	3	0	12	24
MSTRG.2184.1	#N/A	#N/A	172	247	303	803	546	143	170	335	825	376	180	200	183	758	653
MSTRG.18721.5	#N/A	#N/A	0	0	0	0	0	0	0	5	0	0	165	0	0	0	0
rna-XM_001947893.5	LOC100169629	short-chain dehydrogenase/reductase family 16C member 6-like	198	92	61	66	204	160	82	5	18	336	153	34	46	58	92
rna-XM_008188619.3	LOC100167386	uncharacterized LOC100167386	358	1127	1243	1090	1294	414	1037	1348	1145	1116	487	550	1223	1028	1036
rna-XM_003244832.3	LOC100570156	uncharacterized LOC100570156	0	0	0	5	0	0	0	0	0	0	0	0	0	0	0
MSTRG.515.1	#N/A	#N/A	11	0	0	0	0	0	0	0	0	1	0	0	0	3	0
MSTRG.18721.8	#N/A	#N/A	1150	522	572	598	222	1173	738	368	732	280	394	605	429	695	388
MSTRG.3501.1	#N/A	#N/A	5	3	13	5	2	0	6	2	1	0	0	0	4	0	0
MSTRG.25117.1	#N/A	#N/A	30	53	51	37	85	17	44	82	26	32	51	27	70	18	24
MSTRG.1165.1	#N/A	#N/A	0	15	60	19	0	0	2	27	0	0	0	9	0	4	3
rna-XM_016808688.1	LOC100164300	carnitine O-palmitoyltransferase 1, liver isoform-like	474	852	423	2749	2	467	90	124	519	490	1484	414	100	1810	7
rna-XM_008190516.1	LOC103311000	#N/A	0	0	0	0	0	0	0	0	0	0	0	0	0	0	0
rna-XM_003245465.4	LOC100570855	enkurin-like	0	0	0	15	11	0	0	0	7	4	0	0	0	0	0
rna-XM_008190505.1	LOC103310992	#N/A	9	2	0	9	3	5	5	0	2	0	9	6	0	19	2
rna-XR_003839016.1	LOC115033715	#N/A	0	6	0	0	0	0	3	0	0	0	0	0	0	0	4
rna-XM_003248394.2	LOC100573552	chitin deacetylase 1-like	0	0	0	0	0	0	0	0	0	0	0	0	0	0	0
rna-XM_008181511.1	LOC103308325	#N/A	0	0	9	6	6	0	10	17	0	4	14	0	12	0	5
MSTRG.8201.1	#N/A	#N/A	0	0	0	0	0	0	0	0	0	0	0	0	0	17	4
rna-XM_001950239.5	LOC100168305	receptor expression-enhancing protein 4-like	726	882	1150	1909	1474	638	626	1278	1919	841	807	769	943	1617	1753
rna-XM_008188070.3	LOC100165434	negative elongation factor E-like	69	184	753	108	185	207	934	1068	1201	127	702	95	842	175	592
rna-XM_029491259.1	LOC100160328	protein-tyrosine sulfotransferase-like	0	0	0	0	0	0	0	0	0	0	0	0	0	0	0
rna-XM_029489351.1	LOC100570714	uncharacterized LOC100570714	0	9	1	9	57	0	0	0	49	181	0	0	24	227	186
MSTRG.15344.1	#N/A	#N/A	93	45	28	250	67	346	20	30	265	178	255	39	16	0	326
MSTRG.3404.1	#N/A	#N/A	0	1	0	0	0	2	3	0	0	9	0	4	0	0	0
MSTRG.408.1	#N/A	#N/A	30	16	64	138	58	23	34	101	137	30	8	38	56	101	94
rna-NM_001162291.2	LOC100167729	uncharacterized LOC100167729	2086	2027	856	1735	1516	1752	2006	1578	1958	778	1832	1939	903	1600	1178
MSTRG.19147.1	#N/A	#N/A	4	9	0	26	48	26	10	0	42	12	8	0	2	15	43
rna-XM_029485526.1	LOC107883139	#N/A	0	0	0	0	0	0	0	0	0	0	0	0	0	0	0
rna-XM_029487958.1	LOC100164123	endothelial transcription factor GATA-2-like	223	93	0	16	110	0	1	154	0	6	0	93	0	2	0
MSTRG.20409.7	#N/A	#N/A	4	0	9	4	0	11	40	0	0	0	0	38	0	13	61
MSTRG.20409.6	#N/A	#N/A	0	3	0	0	0	0	6	0	230	0	0	85	0	0	130
rna-XR_003838680.1	LOC103309485	#N/A	21	13	9	0	7	10	0	0	6	9	9	8	5	4	0
MSTRG.20409.4	#N/A	#N/A	0	0	1	2	3	1	0	25	3	3	1	0	1	0	26
MSTRG.20409.2	#N/A	#N/A	0	104	0	208	0	0	0	0	0	0	0	0	204	0	120
MSTRG.20409.1	#N/A	#N/A	5	0	1	8	0	0	0	0	0	0	0	0	0	0	64
MSTRG.11436.2	#N/A	#N/A	312	114	73	16	76	346	155	107	20	8	274	220	121	10	50
rna-XM_008186804.2	LOC100165116	uncharacterized LOC100165116	47	59	0	76	441	40	0	0	101	0	0	0	0	93	101
rna-XM_003248999.2	LOC100570971	protoheme IX farnesyltransferase, mitochondrial-like	2090	2129	1545	2351	2363	1960	1525	1499	2607	2050	2148	1652	1251	2510	2089
rna-XM_008183730.1	LOC103309108	#N/A	0	0	0	0	0	0	0	0	0	0	0	0	0	0	0
MSTRG.9428.2	#N/A	#N/A	0	0	0	2	0	1	0	0	0	8	1	0	0	1	1
MSTRG.17310.1	#N/A	#N/A	243	236	223	351	488	180	212	222	534	365	156	196	152	413	345
MSTRG.20409.9	#N/A	#N/A	0	0	0	1	315	0	0	0	0	0	0	0	0	5	0
MSTRG.9428.1	#N/A	#N/A	0	0	0	6	0	5	0	0	0	2	21	0	0	2	1346
MSTRG.14270.25	#N/A	#N/A	0	6	1	0	0	0	0	0	0	0	0	0	0	0	27
rna-Miriab-4	Miriab-4	#N/A	1	1	1	1	1	1	1	1	1	1	1	0	1	1	1
MSTRG.14270.27	#N/A	#N/A	0	255	0	104	0	154	532	226	334	0	356	0	0	0	0
MSTRG.14270.26	#N/A	#N/A	1091	0	651	16	0	380	0	0	488	0	642	0	1	0	0
MSTRG.14270.21	#N/A	#N/A	0	1	0	0	0	1	0	0	0	0	0	0	0	0	0
MSTRG.14270.20	#N/A	#N/A	71	0	5	0	0	0	0	143	0	27	77	0	19	0	0
MSTRG.14270.23	#N/A	#N/A	163	0	0	4	82	0	0	0	0	0	0	0	0	0	0
rna-XM_003245546.4	LOC100571140	inorganic pyrophosphatase-like	9244	6038	8494	4971	7081	5064	6840	3059	10700	3643	7838	7352	4205	5340	8954
MSTRG.1650.1	#N/A	#N/A	0	0	0	0	12	0	0	0	21	6	5	0	0	25	0
MSTRG.14270.29	#N/A	#N/A	0	0	421	0	1	1	0	3	0	30	0	120	84	0	1
rna-XM_001949111.5	LOC100166285	uncharacterized LOC100166285	2347	3122	3914	7667	5755	2254	3062	4170	7477	3312	1960	3044	2455	7388	1710
rna-XM_008186832.3	LOC100163649	uncharacterized LOC100163649	5	57	136	62	32	26	90	146	113	76	72	39	80	27	87
MSTRG.15157.3	#N/A	#N/A	0	5	0	0	0	0	3	15	0	0	0	0	0	5	0
rna-XM_016801480.2	LOC100575588	THAP domain-containing protein 4-like	15	3	8	0	0	10	0	0	5	0	0	3	0	2	13
rna-XM_003245056.4	LOC100166581	histone H2B.3-like	237	168	155	97	163	183	185	152	86	85	224	170	182	118	110
MSTRG.18006.3	#N/A	#N/A	0	0	0	0	0	1323	0	0	0	0	0	0	0	488	0
MSTRG.1171.3	#N/A	#N/A	32	41	32	103	71	29	47	187	49	66	25	37	46	107	84
MSTRG.1171.2	#N/A	#N/A	0	0	0	87	0	0	0	0	0	0	0	0	0	0	0
MSTRG.17161.11	#N/A	#N/A	177	186	213	69	210	50	33	39	245	96	28	30	307	95	233
MSTRG.19157.9	#N/A	#N/A	599	1071	1337	1645	1398	317	778	1731	1880	403	544	696	1070	1218	1450
rna-XM_008187456.1	LOC103310153	#N/A	0	0	0	0	0	0	0	0	0	0	0	0	0	0	0
MSTRG.14152.1	#N/A	#N/A	1	2	3	0	2	2	5	11	11	17	0	3	7	7	2
rna-XM_008185581.3	LOC103309639	#N/A	1106	1298	1253	1657	1558	1075	1105	1475	1490	1032	993	848	1127	1282	1472
rna-XM_003248985.3	LOC100569406	LMBR1 domain-containing protein 2 homolog	127	184	162	343	167	152	109	148	291	81	144	82	106	266	199
rna-XM_016808376.2	LOC100160397	homeobox protein prospero-like	0	0	0	158	0	0	0	0	189	136	0	0	534	0	0
MSTRG.5008.29	#N/A	#N/A	833	941	802	673	355	968	1320	862	597	184	902	831	572	607	543
MSTRG.5008.28	#N/A	#N/A	1575	1392	4769	2950	197	2396	2102	1285	3299	193	4702	1550	1141	572	808
MSTRG.5008.27	#N/A	#N/A	91	153	70	56	55	156	192	99	43	3	51	23	31	10	87
MSTRG.5008.26	#N/A	#N/A	0	16	0	245	31	166	69	49	0	0	0	51	204	43	613
MSTRG.5008.25	#N/A	#N/A	81	88	111	119	0	714	112	481	139	91	0	369	289	80	353
MSTRG.5008.24	#N/A	#N/A	11	177	7	228	40	0	241	268	59	1	1689	0	0	36	0
rna-XM_016801695.2	LOC100162078	glucose dehydrogenase [acceptor]-like	119	191	161	444	7	128	111	0	7	4	195	99	0	0	56
MSTRG.5008.20	#N/A	#N/A	2896	3451	3152	2534	3282	3790	9207	6481	2117	4705	1498	3027	4890	2908	5698
rna-XM_016806230.2	LOC100166807	nose resistant to fluoxetine protein 6-like	0	0	0	0	0	5	0	0	0	0	0	0	0	0	0
rna-XM_001945667.5	LOC100159958	peroxisomal N(1)-acetyl-spermine/spermidine oxidase-like	925	708	555	1015	1128	682	544	226	778	718	339	483	537	822	493
rna-XM_029486725.1	LOC103309453	#N/A	0	4	4	0	0	11	5	0	0	0	2	5	13	0	0
rna-XM_016803603.2	LOC100164019	uncharacterized LOC100164019	0	0	0	0	375	0	365	0	0	0	0	0	0	0	0
MSTRG.21853.1	#N/A	#N/A	0	0	0	0	0	0	0	16	0	0	0	0	0	0	0
rna-XM_029492639.1	LOC100570095	leucine-rich repeat-containing protein 15-like	0	0	0	0	0	0	0	0	0	0	0	73	0	0	0
MSTRG.14830.1	#N/A	#N/A	10	5	15	17	19	0	15	3	28	25	13	7	19	44	22
MSTRG.20844.1	#N/A	#N/A	1797	566	233	796	3608	3792	572	337	1046	2306	1712	645	369	998	1709
rna-XM_029486739.1	LOC100161349	transmembrane protein 120 homolog	0	0	0	0	0	0	0	0	0	0	0	0	0	0	0
MSTRG.1256.1	#N/A	#N/A	0	0	0	4	1	0	0	0	4	2	0	9	4	3	3
MSTRG.8236.1	#N/A	#N/A	1806	2056	1680	2679	2407	1423	1616	1731	2588	1649	1633	1505	1572	2136	2349
rna-XM_008190362.3	LOC100169563	uncharacterized LOC100169563	11	0	0	1	9	0	0	112	0	89	289	0	0	1	1
rna-XM_008182870.3	LOC100159686	mitochondrial intermediate peptidase-like	47	19	97	20	104	8	0	32	29	52	10	95	0	0	39
MSTRG.3224.4	#N/A	#N/A	323	330	206	47	75	82	97	27	221	65	33	30	27	162	39
rna-XM_029490895.1	LOC100572081	leucine-rich repeats and immunoglobulin-like domains protein 3-like	10	15	1	69	21	7	11	38	103	129	317	237	20	125	0
rna-XM_003244317.4	LOC100575054	uncharacterized LOC100575054	0	0	0	0	5	0	0	0	6	35	0	0	0	0	5
MSTRG.21806.1	#N/A	#N/A	138	113	849	166	0	0	123	224	0	0	0	0	0	0	133
rna-NM_001162285.2	LOC100167548	glutathione S-transferase omega-1-like	5514	6139	5399	7683	8159	5326	4790	5525	7512	5887	5453	4778	5287	6724	7069
MSTRG.21806.6	#N/A	#N/A	338	0	7	0	0	0	0	5	586	361	240	604	0	147	0
rna-XM_029489724.1	LOC100168393	cohesin subunit SA-1-like	0	686	756	3888	3433	2295	4128	523	3455	545	0	3045	236	212	730
rna-XM_029489641.1	LOC115034082	#N/A	0	0	0	0	0	0	0	0	0	0	0	0	0	0	0
rna-XM_003245252.4	LOC100574422	zinc transporter ZIP11-like	747	626	932	1156	1130	754	920	971	904	1088	791	563	978	989	1127
MSTRG.7937.1	#N/A	#N/A	19	20	0	4	6	12	14	0	15	14	22	1	0	0	29
rna-XR_003839413.1	LOC103310247	#N/A	48	12	28	37	79	20	56	35	40	10	58	26	11	178	39
MSTRG.10054.2	#N/A	#N/A	0	59	0	74	0	0	0	0	0	0	0	0	0	0	0
MSTRG.10054.3	#N/A	#N/A	12	177	8	643	4	17	13	0	8	7	0	0	3	6	16
MSTRG.19437.2	#N/A	#N/A	11	4	0	0	0	239	5	2	12	6	17	0	17	0	0
MSTRG.10054.1	#N/A	#N/A	0	0	1	0	1	0	0	0	0	0	241	0	1	0	0
MSTRG.10054.6	#N/A	#N/A	622	387	661	755	809	496	531	654	929	430	417	471	501	887	1032
rna-XM_029488749.1	LOC107882999	#N/A	6	0	0	0	6	5	0	0	0	0	5	6	0	0	0
MSTRG.13530.1	#N/A	#N/A	1912	6905	8839	3221	137	1085	1710	2195	8317	5634	2557	3583	1699	165	5395
rna-XM_008187871.3	LOC100166509	uncharacterized family 31 glucosidase KIAA1161-like	0	0	0	0	0	150	0	0	0	0	0	0	15	0	0
rna-XM_008182355.3	LOC103307633	#N/A	112	31	0	344	450	195	13	18	222	250	107	38	24	162	346
MSTRG.1062.2	#N/A	#N/A	173	47	91	873	90	3	139	435	1191	221	0	0	8	0	758
rna-XM_029491243.1	LOC100571594	uncharacterized LOC100571594	0	482	0	0	0	0	0	0	0	0	0	0	0	0	0
rna-XM_016808944.1	LOC107885322	#N/A	0	0	0	0	0	0	0	0	0	0	0	0	0	0	0
rna-XM_029492219.1	LOC103309374	#N/A	0	0	0	0	0	0	0	0	0	0	0	0	0	0	0
rna-XM_029487388.1	LOC107884510	#N/A	0	0	0	0	0	0	4	0	0	0	0	5	0	0	0
rna-XM_003248644.4	LOC100574719	probable cytochrome P450 6a14-like	4682	1245	1353	726	543	10149	1093	1034	1695	1604	5998	1974	1843	1042	1028
rna-XM_016803039.2	LOC100167963	#N/A	1895	2228	2402	3524	2356	1779	1675	2582	3041	1839	1489	219	1554	2354	2992
rna-XM_008183354.1	LOC100575924	possible pseudogene or miscRNA, No KEGG entry	0	0	0	0	0	0	0	0	0	0	7	0	0	0	5
rna-XM_016801278.1	LOC100164449	tumor protein D54-like	22	90	85	97	70	23	106	64	41	65	25	46	78	25	91
MSTRG.15913.1	#N/A	#N/A	5	0	5	26	29	0	2	9	30	17	0	14	13	25	33
rna-XM_016803782.2	LOC100574589	uncharacterized LOC100574589	4	0	0	50	0	0	0	0	0	37	0	0	0	0	0
rna-XM_029489099.1	LOC100168636	basement membrane-specific heparan sulfate proteoglycan core protein-like	0	0	9	0	0	0	946	0	0	0	22	0	0	0	0
MSTRG.24624.1	#N/A	#N/A	175	202	268	968	660	184	205	362	1035	716	114	195	283	1078	562
rna-XM_001949431.5	LOC100160324	UDP-glucuronosyltransferase 2C1-like	56	0	0	13	76	21	0	0	10	10	10	7	0	0	83
MSTRG.681.1	#N/A	#N/A	13	26	20	9	8	14	12	2	37	12	23	10	6	7	11
MSTRG.15421.1	#N/A	#N/A	0	0	0	0	0	0	0	0	0	9	0	0	0	0	0
MSTRG.14752.1	#N/A	#N/A	46	5	163	900	9302	267	406	151	593	2603	507	255	197	1437	2937
rna-XM_008180441.1	LOC100574724	uncharacterized LOC100574724	0	0	0	0	0	0	0	0	0	0	0	0	0	0	0
rna-XM_029488126.1	LOC100573736	aminopeptidase N-like	0	0	0	0	0	0	0	0	0	0	0	0	0	0	0
MSTRG.16059.1	#N/A	#N/A	0	0	0	4	5	0	0	0	0	9	0	0	0	0	0
rna-XM_001946627.5	LOC100164029	decaprenyl-diphosphate synthase subunit 2-like	1603	1279	534	506	744	1210	1187	627	506	786	1204	954	508	524	519
MSTRG.18308.3	#N/A	#N/A	573	489	425	838	324	186	0	0	938	498	0	496	0	812	789
MSTRG.18308.1	#N/A	#N/A	44	0	5	7	375	0	0	0	6	4	0	1	0	5	4
rna-NM_001162211.2	LOC100165958	alpha-tocopherol transfer protein-like	97	85	39	32	199	165	45	91	109	310	345	164	49	56	80
MSTRG.1668.1	#N/A	#N/A	4	0	0	0	1	0	0	0	0	9	9	0	0	0	12
rna-XM_008183724.3	LOC100159255	ubiquitin carboxyl-terminal hydrolase isozyme L5-like	3467	2376	2678	5936	7958	2389	2484	5782	3812	1815	2473	2776	2625	4487	3015
rna-XM_001945063.5	LOC100160344	cell growth regulator with RING finger domain protein 1-like	1414	1380	1230	1557	2033	1727	1580	1386	1683	1126	1492	839	561	1327	1922
MSTRG.5484.1	#N/A	#N/A	4	16	12	18	23	6	8	9	18	16	8	15	3	32	16
rna-XM_029489203.1	LOC100574425	uncharacterized LOC100574425	0	0	0	0	0	0	0	0	0	0	0	0	0	0	0
rna-XR_001678800.2	LOC107882566	#N/A	3	0	0	67	45	2	45	34	50	0	1	6	0	0	58
MSTRG.10409.4	#N/A	#N/A	0	0	0	0	0	0	0	0	0	0	0	0	0	858	0
rna-XM_016802543.2	LOC107883098	#N/A	0	3	0	0	0	5	0	5	21	11	0	7	0	9	9
rna-XM_016806351.2	LOC100161471	uncharacterized protein C18orf8 homolog	1	0	0	2	31	0	0	68	0	54	0	0	0	51	70
rna-XM_029486388.1	LOC100169514	leucine-rich repeat-containing protein 6-like	8	13	28	0	54	18	21	33	82	34	6	9	42	56	60
MSTRG.2735.2	#N/A	#N/A	1323	0	1038	1918	1391	600	0	0	0	994	0	0	0	1654	1570
rna-XM_008188458.3	LOC100161660	uncharacterized LOC100161660	529	1306	603	678	9	24	72	1461	648	729	0	0	1320	0	0
MSTRG.22113.5	#N/A	#N/A	0	0	0	0	0	0	0	358	0	0	0	0	0	0	0
rna-XM_008187113.2	LOC100162578	pyruvate kinase-like	0	0	0	0	0	0	0	0	0	0	0	0	0	0	0
rna-XM_001951178.4	LOC100168944	suppressor of hairless protein-like	835	1233	1540	1422	1730	857	1048	1036	1762	959	825	954	1043	1098	1417
gene-LOC115033482	LOC115033482	#N/A	0	0	0	0	0	0	0	0	0	0	0	0	0	0	0
gene-LOC115033483	LOC115033483	#N/A	0	1	0	0	0	0	0	0	0	0	0	1	0	0	0
gene-LOC115033481	LOC115033481	#N/A	6	0	0	6	1	0	1	3	13	1	0	0	3	0	4
MSTRG.23231.1	#N/A	#N/A	138	112	22	235	463	205	38	30	225	210	142	55	63	254	315
gene-LOC115033484	LOC115033484	#N/A	0	2	0	0	0	0	2	0	0	0	0	4	1	0	0
rna-NM_001246166.1	ACYPI46564	#N/A	4508	4235	2886	3727	3780	3701	3317	3130	3611	3015	3940	3293	2757	3183	3305
rna-XR_003838734.1	LOC115033407	#N/A	4	10	4	0	6	2	0	0	12	12	0	12	0	0	6
MSTRG.4112.1	#N/A	#N/A	29	20	0	0	9	53	9	3	0	0	32	14	0	3	2
rna-XM_029490165.1	LOC100574753	facilitated trehalose transporter Tret1-like	0	0	0	0	0	0	0	0	0	0	0	0	0	0	0
rna-XM_016808885.2	LOC100161354	aminopeptidase N-like	50	24	2	10	3	69	23	2	0	0	43	7	6	0	19
rna-XM_016809053.2	LOC103311283	#N/A	7	14	20	33	14	10	0	14	18	17	4	17	0	21	19
MSTRG.18426.2	#N/A	#N/A	115	65	0	0	83	53	0	0	0	0	111	33	0	0	63
rna-XM_008189505.2	LOC100161526	vesicular inhibitory amino acid transporter-like	87	0	0	0	0	0	0	0	0	0	0	0	0	0	0
rna-XM_001950849.3	LOC100166102	protein CREG2-like	1580	1579	1291	2452	3290	1497	1284	1422	2620	4839	1461	1134	1353	2403	2643
MSTRG.11982.1	#N/A	#N/A	2	0	0	13	10	0	0	0	0	2	1	0	0	21	4
rna-XM_029488386.1	LOC100167899	condensin complex subunit 1-like	0	0	0	0	0	0	1	0	581	0	0	0	0	0	1
rna-XM_008191711.3	LOC100575044	uncharacterized LOC100575044	0	0	0	108	0	0	0	104	6	0	0	0	0	257	1
MSTRG.16880.1	#N/A	#N/A	0	0	0	833	0	288	0	0	0	461	367	0	440	269	0
rna-XM_001947142.5	LOC100163254	chitooligosaccharidolytic beta-N-acetylglucosaminidase-like	92	71	88	93	30	111	7	153	97	75	74	63	92	60	157
rna-XM_001943667.4	LOC100166952	solute carrier family 35 member F4-like	138	39	0	343	587	530	0	40	355	415	438	119	47	186	427
MSTRG.1266.2	#N/A	#N/A	0	74	0	304	1	0	0	82	0	0	0	0	71	0	0
rna-NM_001293380.1	LOC100162621	epsilon-sarcoglycan-like	118	14	0	62	70	11	3	0	0	67	23	0	0	0	0
MSTRG.1266.1	#N/A	#N/A	46	81	147	3	211	70	45	68	235	80	25	45	1	164	242
MSTRG.1266.4	#N/A	#N/A	185	0	0	0	0	26	0	0	0	0	0	0	0	0	0
rna-XM_008186444.1	LOC103309863	#N/A	0	0	0	0	0	0	0	0	0	0	0	0	0	0	0
MSTRG.16002.1	#N/A	#N/A	0	0	0	0	0	0	0	0	5	8	0	4	0	0	0
MSTRG.18568.1	#N/A	#N/A	433	308	0	80	155	262	0	131	0	0	134	154	1	0	464
rna-XM_008182548.2	LOC100158804	glutaredoxin-like	4197	2763	4530	6491	5766	4932	4366	3207	6470	3874	3261	5625	4792	3836	4502
rna-XM_029490171.1	LOC100161417	Bloom syndrome protein homolog	60	10	0	23	101	0	10	6	115	4	0	0	3	7	9
rna-XM_008188031.3	LOC100161313	uncharacterized protein C34C12.4	1092	863	1248	1970	2118	1062	1360	1166	1817	911	577	1056	1117	1469	1862
MSTRG.11710.1	#N/A	#N/A	0	1	0	0	5	4	0	0	1	16	3	1	1	0	5
rna-NM_001246045.2	LOC100165686	uncharacterized protein C20orf24 homolog	1571	468	1439	3898	2243	1629	1572	2254	4071	1219	1325	1651	1714	2645	2325
MSTRG.6995.6	#N/A	#N/A	0	0	0	0	71	0	52	68	69	0	67	77	0	0	0
MSTRG.4538.3	#N/A	#N/A	0	19	594	801	571	460	528	273	515	34	421	366	36	575	0
MSTRG.6995.4	#N/A	#N/A	63	90	9	29	18	51	27	0	2	45	32	19	25	33	35
MSTRG.6995.5	#N/A	#N/A	123	56	48	16	39	168	50	53	106	138	105	77	252	53	49
MSTRG.6995.2	#N/A	#N/A	0	60	106	0	0	719	103	7	104	24	329	320	173	0	0
MSTRG.4029.1	#N/A	#N/A	3	7	4	18	0	28	0	9	0	0	6	0	0	2	8
rna-XM_029488342.1	LOC115033854	#N/A	0	0	0	0	0	0	0	0	5	0	0	0	0	0	0
rna-NM_001293521.1	LOC100169176	synaptogyrin-2-like	241	55	15	29	189	271	0	0	29	154	158	5	76	45	64
rna-XM_016807376.2	LOC100159180	proprotein convertase subtilisin/kexin type 6-like	0	0	0	0	0	5	0	0	0	0	12	8	5	0	0
MSTRG.22695.1	#N/A	#N/A	6	24	29	118	56	31	34	40	70	102	13	20	37	131	79
MSTRG.22265.1	#N/A	#N/A	4	4	6	2	13	3	16	14	0	0	7	12	16	3	7
rna-XM_003246053.4	LOC100163344	acetyl-coenzyme A transporter 1-like, Protein transporter; Peptide-acetyl-CoA transporter; similar to conserved hypothetical protein	1521	448	656	442	0	1176	856	444	343	373	912	1039	491	516	657
MSTRG.17339.1	#N/A	#N/A	4356	4155	3149	9364	2547	3732	2765	4129	6298	4031	825	2824	2012	7104	7684
rna-XM_001950954.4	LOC100161044	uncharacterized LOC100161044	1280	1217	1210	2021	1728	1125	1151	1402	2251	1616	1081	1086	1181	1776	1982
rna-XM_003243305.4	LOC100159697	TOM1-like protein 2-like	882	30	1	1425	249	620	30	1	78	2	234	155	1	14	248
rna-XM_008190901.1	LOC103311311	#N/A	0	0	0	0	0	0	0	0	0	0	0	0	0	0	0
rna-XR_003839025.1	LOC115033726	#N/A	6	0	0	0	0	0	11	0	0	3	0	0	0	3	3
rna-XM_016802836.2	LOC100167886	sodium/potassium-transporting ATPase subunit alpha-like	2	0	0	0	0	4	0	0	549	2	0	351	0	0	0
rna-XM_016809060.1	LOC107885420	#N/A	0	0	0	0	0	0	0	0	0	0	0	0	0	0	0
rna-XM_001949923.5	LOC100165843	CDK5 regulatory subunit-associated protein 3-like	1670	2049	1651	3291	2426	1451	1494	1834	3067	1401	449	1535	1341	823	2624
MSTRG.18789.1	#N/A	#N/A	5	16	8	31	14	5	21	16	41	10	8	18	0	37	22
MSTRG.17892.1	#N/A	#N/A	0	14	2	2	2	4	4	0	14	6	7	3	1	12	0
MSTRG.6105.1	#N/A	#N/A	0	0	1	3	0	0	0	214	3	0	2	0	0	1	2
rna-XM_029488756.1	LOC100167274	uncharacterized LOC100167274	38	0	0	0	0	0	0	0	0	0	76	0	0	0	0
MSTRG.6105.3	#N/A	#N/A	176	226	5	1774	10	4	0	0	1878	1	8	0	3	0	1
MSTRG.13922.6	#N/A	#N/A	0	2674	2577	3912	2062	0	2278	2816	957	405	833	1560	46	416	787
MSTRG.13922.8	#N/A	#N/A	13	293	252	725	1438	1749	166	309	3432	2612	21	140	1328	2790	128
rna-XM_016806981.2	LOC107884576	#N/A	0	0	0	8	0	13	0	0	4	0	30	17	0	0	9
rna-XM_029488698.1	LOC100164300	carnitine O-palmitoyltransferase 1, liver isoform-like	2372	1693	671	187	643	963	2172	960	486	833	356	1248	1141	88	1491
MSTRG.20123.1	#N/A	#N/A	3	7	5	11	71	57	6	10	73	14	4	14	26	28	64
MSTRG.1258.1	#N/A	#N/A	3080	0	1359	0	0	0	0	0	0	0	0	0	0	1309	1829
rna-XM_016801250.2	LOC107882634	#N/A	0	0	0	5	0	0	0	0	3	7	0	0	0	0	7
MSTRG.4447.1	#N/A	#N/A	141	216	142	177	209	129	115	95	290	322	186	173	152	208	266
rna-XM_016801193.1	LOC103308105	#N/A	0	0	0	0	0	0	0	1	0	0	0	0	0	0	0
rna-XM_008191705.3	LOC100160807	uncharacterized LOC100160807	84	0	0	4	81	0	9	120	0	117	4	0	0	0	6
rna-XM_001943677.5	LOC100161467	synaptic vesicle glycoprotein 2B-like	0	0	6	273	8	0	1	8	6	0	0	0	939	145	990
rna-XM_029488401.1	LOC100159770	tetratricopeptide repeat protein 21B-like	0	0	0	0	0	0	0	0	0	0	0	0	0	0	0
MSTRG.4556.1	#N/A	#N/A	19	30	49	6	43	6	27	47	12	2	20	17	31	18	3
MSTRG.20058.1	#N/A	#N/A	10	63	135	128	375	11	13	9	148	64	83	52	12	115	220
MSTRG.12480.1	#N/A	#N/A	504	390	216	454	411	470	244	172	539	198	345	370	134	447	240
rna-XM_016801240.2	LOC100162706	UPF0558 protein-like	0	82	0	153	0	97	93	0	0	114	54	86	0	0	222
rna-XM_003241900.3	LOC100574530	uncharacterized LOC100574530	0	0	0	0	0	0	0	0	0	0	0	0	0	0	0
rna-XM_029489940.1	LOC115034144	#N/A	0	0	0	0	0	0	0	0	0	0	0	0	0	0	0
rna-XM_029487405.1	LOC107884503	#N/A	31	83	63	88	35	23	43	66	19	13	40	21	55	78	0
rna-XM_001945285.5	LOC100168554	uncharacterized LOC100168554	44	45	241	148	224	62	51	282	144	218	72	51	262	99	234
rna-XM_016800688.2	LOC100165564	uncharacterized LOC100165564	0	1	0	0	0	1	0	0	0	0	0	0	0	0	0
MSTRG.24470.6	#N/A	#N/A	0	36	99	57	43	24	110	103	143	138	60	86	79	237	27
MSTRG.3351.3	#N/A	#N/A	261	0	0	0	0	0	0	0	0	0	0	0	0	0	0
MSTRG.3351.2	#N/A	#N/A	32	308	433	584	481	318	230	259	390	343	670	292	210	406	453
rna-XM_008182028.3	LOC100168230	acyl-CoA Delta(11) desaturase-like	214	0	227	257	0	260	0	226	142	0	179	129	0	0	0
rna-XM_008188713.3	LOC103310436	#N/A	0	11	13	62	18	7	18	12	35	9	0	13	22	39	28
MSTRG.12957.1	#N/A	#N/A	33	44	2	20	14	31	12	11	23	23	19	56	8	37	18
rna-NM_001162239.1	LOC100166523	ring finger protein 5-like	302	804	830	1427	1453	1334	310	465	1320	431	1084	238	699	1333	1540
MSTRG.24470.4	#N/A	#N/A	0	44	0	0	0	0	0	2	0	0	0	0	0	0	0
MSTRG.14631.12	#N/A	#N/A	0	0	69	0	0	0	0	0	0	0	0	0	0	0	118
MSTRG.22113.3	#N/A	#N/A	0	0	152	0	0	0	0	174	0	0	0	1	0	0	200
MSTRG.8851.5	#N/A	#N/A	118	72	152	124	119	45	99	99	85	93	97	69	67	35	70
MSTRG.8851.4	#N/A	#N/A	27	107	132	175	212	60	135	118	117	196	59	35	116	173	74
MSTRG.8851.3	#N/A	#N/A	0	84	0	0	0	0	0	71	0	0	0	28	0	0	32
rna-XM_003245157.4	LOC100159728	facilitated trehalose transporter Tret1-like	4151	5615	3527	1214	86	3045	4156	4444	1055	830	5447	2284	2458	126	1430
rna-XM_003242246.2	LOC100575590	zinc finger BED domain-containing protein 4-like	4	0	0	0	0	2	0	0	2	0	3	0	0	0	5
MSTRG.12695.1	#N/A	#N/A	0	0	0	0	5	0	0	0	0	8	0	0	0	0	5
MSTRG.7227.1	#N/A	#N/A	185	140	122	179	157	112	110	111	168	73	146	145	101	168	184
rna-XM_008184829.3	LOC100163007	serpin B8-like	136	293	340	822	700	56	157	540	1108	252	107	99	421	656	625
MSTRG.8932.1	#N/A	#N/A	10	44	35	183	145	8	59	48	272	81	24	51	19	183	144
rna-XM_016809267.1	LOC107885603	#N/A	0	0	0	0	0	0	0	0	0	0	0	0	0	0	0
rna-XM_008186148.3	LOC100166113	eIF2B-alpha protein-like	12	47	28	59	2	64	0	6	80	17	52	138	72	165	118
rna-XM_001948705.5	LOC100163340	elongation factor 1-alpha-like	13316	15629	10210	4084	5995	11530	12670	10620	3419	6935	11831	9307	13142	3503	6698
MSTRG.16644.1	#N/A	#N/A	8	21	12	7	16	15	7	11	10	3	13	6	7	6	9
rna-XM_003246714.4	LOC100569198	UPF0454 protein C12orf49 homolog	433	415	354	679	576	362	341	421	717	269	316	335	333	655	634
rna-XR_001680574.2	LOC103311873	#N/A	0	0	0	0	0	0	0	0	2	0	0	0	0	0	0
MSTRG.20823.11	#N/A	#N/A	134	315	293	543	510	198	221	351	577	394	180	246	268	730	484
MSTRG.10971.3	#N/A	#N/A	0	0	0	0	0	0	472	0	0	0	0	0	0	0	0
MSTRG.14513.1	#N/A	#N/A	272	1	0	1	3	5	1	0	0	0	2	3	2	0	0
rna-XM_016804743.2	LOC100162662	uncharacterized LOC100162662	242	19	5	0	0	31	0	24	337	0	0	0	132	0	0
MSTRG.10355.2	#N/A	#N/A	0	4	1	0	0	0	0	0	0	0	5	721	0	0	0
MSTRG.10355.3	#N/A	#N/A	70	1	13	0	1	23	31	0	0	0	61	0	0	1228	134
MSTRG.10355.4	#N/A	#N/A	0	0	0	0	0	0	0	2961	0	0	0	0	0	0	0
MSTRG.10355.5	#N/A	#N/A	0	0	0	2805	0	0	0	0	0	0	0	0	0	1577	0
rna-NM_001204952.1	LOC100159205	NADH-cytochrome b5 reductase-like (EC:1.6.2.2)	5217	282	4130	2460	1970	4287	2972	4019	2511	866	3527	1855	3498	1528	1602
rna-XM_003242571.4	LOC100573036	glucosidase 2 subunit beta-like	279	259	289	241	179	242	84	133	307	146	212	205	0	166	0
rna-XM_008191791.3	LOC100166886	brain mitochondrial carrier protein 1-like, active transporters; similar to AGAP011839-PA	8	55	14	66	17	9	34	4	67	6	195	147	0	177	2
MSTRG.23725.1	#N/A	#N/A	0	0	9	0	0	0	0	0	0	0	0	0	0	0	0
MSTRG.11844.1	#N/A	#N/A	0	0	0	2	0	0	0	0	0	9	0	0	0	0	4
MSTRG.25121.1	#N/A	#N/A	0	0	0	0	0	0	0	0	0	0	0	0	0	0	13
MSTRG.19925.1	#N/A	#N/A	59	33	12	2	0	40	23	18	4	8	95	50	17	17	2
rna-XM_016808466.2	LOC100162723	solute carrier family 25 member 40-like	5	74	41	58	175	46	70	74	71	4	136	502	864	504	52
rna-XM_029487055.1	LOC100160310	titin-like	0	0	0	0	0	0	0	0	0	0	0	0	0	0	0
MSTRG.10580.1	#N/A	#N/A	0	0	12	0	0	0	0	0	0	0	0	0	0	0	2
rna-XR_001680546.2	LOC107885833	#N/A	0	0	0	5	0	0	0	3	0	0	0	0	0	0	6
rna-XM_001943463.5	LOC100167117	erlin-1-like	876	986	1298	2980	2056	434	725	1631	2893	1135	672	808	991	2075	2447
MSTRG.10069.1	#N/A	#N/A	0	0	0	11	3	0	2	0	0	0	0	0	0	1	0
MSTRG.13443.1	#N/A	#N/A	633	4724	289	894	746	212	686	954	3855	2393	2074	4351	4103	1595	1094
MSTRG.6304.3	#N/A	#N/A	1564	2495	2273	3358	2796	2044	2196	2599	4218	1808	1756	2308	2046	3451	2928
rna-XM_008181419.2	LOC100167596	isopentenyl-diphosphate Delta-isomerase 1-like	0	0	0	0	0	0	0	0	0	0	0	0	0	0	0
MSTRG.6304.1	#N/A	#N/A	200	4	0	0	0	0	0	0	0	0	5	0	0	0	0
rna-XM_001947941.5	LOC100164186	uncharacterized LOC100164186	217	157	93	14	71	110	32	22	73	48	294	25	47	75	30
MSTRG.19657.1	#N/A	#N/A	7028	3998	1195	578	515	5411	2334	1016	608	617	5407	2782	1507	453	521
MSTRG.10349.1	#N/A	#N/A	32	10	0	134	191	30	5	7	161	136	31	12	10	109	103
MSTRG.17843.2	#N/A	#N/A	7310	4892	13266	10973	11384	4262	12288	6697	22032	12658	10591	4805	10911	9194	18801
rna-XR_510422.3	LOC100575479	uncharacterized LOC100575479	418	833	807	1886	1473	482	758	940	2158	760	525	655	566	1651	1716
rna-XM_001951625.5	LOC100163263	inosine-5'-monophosphate dehydrogenase-like	20393	21404	15457	17552	17798	17740	16457	15365	16789	16685	18213	16202	14440	15709	15695
rna-XM_003243190.4	LOC100161219	ring canal kelch homolog	66	976	470	1357	2187	169	516	1136	0	2387	0	651	62	1459	871
rna-XM_029485909.1	LOC100168714	uncharacterized LOC100168714	0	0	0	0	0	0	5	0	0	0	0	0	0	0	0
rna-XM_008191338.1	LOC103311654	#N/A	7	0	0	0	0	2	1	0	0	2	0	5	0	0	1
MSTRG.2880.4	#N/A	#N/A	0	0	0	0	0	1024	0	0	0	0	2	0	0	0	0
rna-XM_008190086.1	LOC103310771	#N/A	1	0	0	0	0	0	0	0	3	0	0	0	0	1	0
rna-XM_001944448.5	LOC100168355	#N/A	6	12	4	51	162	9	0	0	67	19	4	6	0	86	145
MSTRG.2880.2	#N/A	#N/A	0	0	0	145	550	653	0	301	0	0	0	0	0	0	315
rna-XM_016802868.2	LOC107883230	#N/A	0	0	0	0	0	0	0	0	0	0	0	0	0	0	0
MSTRG.17188.2	#N/A	#N/A	0	0	0	0	0	724	0	0	0	0	0	857	667	0	0
rna-XM_008186207.3	LOC100161626	uncharacterized LOC100161626	0	0	0	0	0	6	1	0	0	8	0	10	0	0	0
MSTRG.7797.1	#N/A	#N/A	21	0	0	0	45	0	0	31	2	0	33	21	10	0	16
rna-XM_008191676.3	LOC100570060	fragile X mental retardation syndrome-related protein 1-like	75	64	5	172	75	87	0	7	91	6	0	178	0	157	61
MSTRG.7797.3	#N/A	#N/A	0	22	0	0	11	0	0	0	0	0	66	18	0	0	0
MSTRG.21318.30	#N/A	#N/A	9	2967	1754	0	3	0	0	25	0	44	225	0	986	1	0
MSTRG.23739.1	#N/A	#N/A	0	0	1	10	0	0	1	0	0	2	0	0	0	2	11
MSTRG.18521.1	#N/A	#N/A	0	0	0	2	2	0	0	0	0	13	0	0	0	0	0
MSTRG.22480.1	#N/A	#N/A	0	0	6	14	20	0	1	7	12	20	0	0	7	11	9
MSTRG.6652.2	#N/A	#N/A	81	0	0	0	1	0	0	0	0	0	0	0	0	0	2
rna-XM_003247835.4	LOC100574717	uncharacterized LOC100574717	0	0	0	0	12	0	0	0	2	2	0	0	0	0	0
MSTRG.13121.5	#N/A	#N/A	0	0	0	0	0	94	0	0	0	0	9	0	0	0	0
rna-XM_008186931.3	LOC100169119	uncharacterized LOC100169119	0	195	1	44	41	1	287	81	38	1	1	463	31	1	28
rna-XM_029491116.1	LOC100165129	DNA replication licensing factor MCM9-like	249	256	46	9	28	81	8	42	93	285	278	0	117	10	305
MSTRG.13121.1	#N/A	#N/A	0	1	15	52	0	0	68	89	148	1	0	97	1	0	0
rna-XM_008188486.3	LOC103310372	splicing factor 3B subunit 5	1224	1770	2519	3988	2959	1517	1774	2553	3723	1454	1530	2003	2306	3368	3206
MSTRG.11386.2	#N/A	#N/A	0	4433	0	9494	0	0	0	0	8	25	18	2	0	0	5450
rna-XM_001949498.5	LOC100161782	e3 ubiquitin-protein ligase Bre1-like	1312	1269	1781	1410	1391	1317	1471	1838	1794	1120	1206	845	1289	1451	1457
MSTRG.669.1	#N/A	#N/A	5	29	16	26	54	13	12	28	67	10	8	12	4	19	15
MSTRG.18030.1	#N/A	#N/A	10	0	0	1	0	2	0	0	0	0	0	0	0	0	1
rna-XR_003840167.1	LOC107885259	#N/A	0	0	0	0	0	0	0	0	0	0	0	0	0	0	0
rna-XM_008187938.2	LOC100162642	possible pseudogene or miscRNA, No KEGG entry	768	232	507	415	311	631	723	380	357	144	523	472	863	651	741
MSTRG.162.1	#N/A	#N/A	0	2	0	18	8	5	16	3	8	5	2	0	8	6	7
MSTRG.24900.1	#N/A	#N/A	6	3	14	0	9	9	17	7	0	15	3	0	5	0	3
MSTRG.3718.1	#N/A	#N/A	45	41	14	80	61	21	13	55	139	38	6	71	7	100	82
rna-XM_003247516.4	LOC100571500	elongation of very long chain fatty acids protein 4-like	390	185	447	152	165	399	363	6	143	0	1032	776	385	220	15
rna-XM_029486052.1	LOC100162866	uncharacterized LOC100162866	58	1019	1347	0	1606	727	0	39	0	1044	726	26	836	1	1692
MSTRG.4374.1	#N/A	#N/A	4	9	1	5	0	0	0	27	4	4	0	1	2	45	4
MSTRG.4374.3	#N/A	#N/A	16	0	1	0	1	0	0	0	10	0	41	0	0	0	0
MSTRG.4374.2	#N/A	#N/A	52	35	22	53	32	34	48	7	15	13	13	13	2	0	32
MSTRG.11231.1	#N/A	#N/A	15	0	0	0	0	8	5	0	3	0	0	3	1	5	0
rna-NM_001161920.2	LOC100159254	RNA-binding protein NOB1-like	5130	5566	4960	5814	6266	4651	4718	4850	5700	5109	4859	4390	5108	5462	5500
MSTRG.11722.1	#N/A	#N/A	23	26	14	5	6	22	16	14	6	19	24	14	8	4	6
rna-XM_008189090.3	LOC100160077	serine/threonine-protein kinase PAK 1-like	0	0	0	0	0	0	0	0	0	0	0	0	0	0	0
rna-XM_016806573.2	LOC100165154	hydroxymethylglutaryl-CoA synthase 1-like	0	0	0	10	17	0	0	0	11	3	0	0	2	0	0
rna-XM_008184103.2	LOC100159597	hemicentin-1-like	0	3357	2341	0	4758	4338	3624	0	0	2631	3687	0	2114	0	0
MSTRG.20970.1	#N/A	#N/A	21	0	0	0	4	24	0	0	0	0	37	12	0	0	1206
rna-XM_008186582.1	LOC103309900	#N/A	0	0	0	2	0	0	5	2	0	0	3	0	0	0	0
rna-XM_003246627.4	LOC100161865	actin-interacting protein 1-like	2094	2428	2261	1396	1397	607	1999	927	3966	2274	915	792	1131	1391	3325
rna-XM_016807128.2	LOC100168800	#N/A	0	0	0	0	0	0	0	0	0	0	0	0	0	0	0
rna-XM_001944856.5	LOC100164285	coiled-coil domain-containing protein 85C-like	573	718	838	1218	953	699	639	786	1113	619	554	417	679	924	1322
rna-XM_008184801.2	LOC100574393	uncharacterized LOC100574393	0	0	0	0	0	0	0	0	0	0	0	0	0	0	0
MSTRG.16388.1	#N/A	#N/A	0	0	16	4	10	0	0	4	3	0	0	0	0	4	2
rna-XM_016806814.2	LOC100575435	prolyl 4-hydroxylase subunit alpha-3-like	0	0	0	0	56	0	90	12	0	0	47	0	0	0	0
rna-XM_016801654.2	LOC100159814	sodium-independent sulfate anion transporter-like	0	0	130	71	0	0	49	8	139	0	0	154	163	99	103
rna-XM_003244298.4	LOC100166825	putative ankyrin repeat protein L25-like	427	660	622	522	498	385	533	701	460	271	466	595	587	341	472
MSTRG.20049.1	#N/A	#N/A	3	7	10	11	0	0	0	8	2	0	0	0	3	2	12
rna-XM_016804913.2	LOC100165884	chorion peroxidase-like	1268	1152	372	260	404	1919	616	126	321	0	1436	780	28	812	375
MSTRG.24213.1	#N/A	#N/A	57	59	56	49	56	66	46	32	36	47	42	24	22	18	42
rna-NM_001162051.2	LOC100162201	CG7224-like	1485	1193	878	1395	1425	1244	904	917	1740	643	1259	1278	813	1418	1454
MSTRG.12872.1	#N/A	#N/A	0	0	0	0	0	0	0	0	0	25	0	5	0	0	2
rna-XM_008183882.3	LOC100166529	rho GTPase-activating protein 100F-like	0	0	0	0	104	0	0	0	0	114	0	0	0	0	0
rna-XM_001944947.5	LOC100169490	Protein transporter; Peptide-acetyl-CoA transporter; similar to acetyl-coenzyme A transporter	538	277	226	101	409	298	118	443	536	559	309	691	408	556	594
rna-XM_016809064.1	LOC107885425	#N/A	0	0	0	0	0	0	0	0	0	0	0	0	0	0	0
MSTRG.1905.1	#N/A	#N/A	0	0	0	9	0	0	20	0	0	0	0	0	0	0	0
MSTRG.15074.26	#N/A	#N/A	32	11	0	9	18	3	5	4	20	0	0	9	0	8	70
MSTRG.19508.1	#N/A	#N/A	83	52	34	28	31	63	46	38	22	31	44	59	39	29	34
MSTRG.13049.1	#N/A	#N/A	0	901	78	1	0	574	1	1	3	3	2	0	0	0	0
MSTRG.11364.1	#N/A	#N/A	9	4	0	0	23	17	11	2	7	5	2	5	0	3	16
MSTRG.13049.2	#N/A	#N/A	0	1	0	0	0	0	639	2	2	0	0	0	0	2	175
MSTRG.14659.2	#N/A	#N/A	0	0	0	0	221	0	0	0	0	25	0	0	0	5	116
rna-XM_029492072.1	LOC115034705	#N/A	7	6	11	11	13	8	13	13	12	27	6	5	7	10	11
rna-XM_029490210.1	LOC100162616	glutamate-gated chloride channel-like, active transporters; similar to pH-sensitive chloride channel	103	94	23	19	105	75	320	182	152	24	285	254	26	202	193
rna-XM_029485412.1	LOC103309783	#N/A	10	11	14	5	0	10	8	0	23	0	9	6	0	9	0
MSTRG.13078.4	#N/A	#N/A	635	0	143	0	61	325	208	0	0	0	8	0	2	0	0
rna-XM_008180546.3	LOC100575814	uncharacterized LOC100575814	0	130	0	16	0	0	0	139	0	0	0	23	100	0	0
rna-XM_001951975.5	LOC100168751	ras-related protein Rap-2c-like	840	2027	933	1649	1411	1248	1622	1144	2162	1250	994	509	1060	584	1027
MSTRG.8114.6	#N/A	#N/A	0	0	0	0	0	0	0	0	0	0	484	0	0	0	0
rna-XM_008185295.2	LOC100570775	14-3-3 protein sigma-like	0	0	0	0	0	0	0	0	0	0	0	0	0	0	0
MSTRG.5903.1	#N/A	#N/A	16	28	9	5	12	8	12	17	11	4	12	18	11	9	13
rna-XM_029485464.1	LOC100162949	protein piwi-like	16	5	5	0	0	7	0	0	0	0	0	0	0	5	0
rna-XM_001947077.5	LOC100168947	protein FAM116B-like	1824	1799	1437	1317	1262	1539	1581	1553	1271	896	1350	1347	1272	1108	1567
rna-XM_029492048.1	LOC107883058	#N/A	0	0	0	0	0	0	0	0	0	0	0	0	0	0	0
rna-NM_001162122.2	LOC100163907	uncharacterized LOC100163907	4246	4536	4836	7032	6271	4101	4147	5162	6699	4492	4120	3839	4526	5820	6755
rna-XM_003244125.2	LOC100575880	52 kDa repressor of the inhibitor of the protein kinase-like	0	0	0	9	0	0	0	0	0	0	0	0	6	0	0
rna-XM_016807673.2	LOC107884799	#N/A	15	14	0	0	10	9	10	0	0	12	5	9	0	9	0
MSTRG.12240.3	#N/A	#N/A	1316	1678	3394	0	4221	1507	2710	1889	3997	0	2258	1407	2368	1522	1187
MSTRG.9951.4	#N/A	#N/A	161	0	0	206	0	222	0	0	170	0	172	310	230	0	331
MSTRG.9951.3	#N/A	#N/A	73	88	60	84	126	62	43	72	151	56	64	37	60	57	46
MSTRG.12240.4	#N/A	#N/A	809	483	681	714	424	437	455	633	646	461	500	947	403	853	865
MSTRG.20752.6	#N/A	#N/A	0	0	14	0	119	0	32	0	0	3	0	176	0	0	28
rna-XM_001950323.5	LOC100159523	cAMP-dependent protein kinase type I regulatory subunit-like	984	912	135	105	930	1320	569	7	170	619	1148	285	86	189	801
rna-XM_029492149.1	LOC115034745	#N/A	0	0	0	0	0	2	0	0	0	0	0	0	0	0	0
rna-XM_001946441.5	LOC100167322	organic cation transporter 1-like	166	21	26	21	100	175	3	18	40	32	92	5	15	17	51
rna-XM_008180534.1	LOC100575245	possible pseudogene or miscRNA, No KEGG entry	2	0	0	0	0	0	0	1	0	0	0	0	0	4	0
rna-XM_001948958.4	LOC100162573	uncharacterized protein C6orf105 homolog	115	120	14	49	499	109	71	56	18	605	169	39	33	45	332
rna-XM_008187195.3	LOC100164207	uncharacterized LOC100164207	17	4	0	0	61	70	17	13	0	19	0	24	0	0	0
rna-XM_029491655.1	LOC100568886	protein FAM49B-like	0	0	0	0	0	0	0	0	0	0	0	0	0	0	1
rna-XM_001942934.5	LOC100167052	nephrin-like	204	191	336	327	545	213	149	383	271	429	241	92	269	192	523
MSTRG.23939.1	#N/A	#N/A	0	0	0	2	0	0	0	0	2	17	0	0	0	4	0
rna-XM_016805437.1	LOC107884060	#N/A	15	17	7	5	5	8	6	7	0	6	8	3	4	1	5
rna-XM_003245365.4	LOC100572522	proton-coupled folate transporter-like	275	245	116	115	354	228	266	156	173	190	281	204	76	70	286
MSTRG.21489.1	#N/A	#N/A	0	0	697	691	0	89	622	768	278	861	429	496	564	329	0
rna-XM_001948823.4	LOC100165034	uncharacterized protein C19orf47 homolog	1734	1336	1467	1436	2994	1495	1685	1605	2661	982	840	385	1000	1662	3030
rna-XM_003241689.4	LOC100571897	uncharacterized LOC100571897	0	0	0	0	0	0	0	0	0	0	0	0	0	0	0
MSTRG.12306.4	#N/A	#N/A	0	145	0	0	0	0	0	0	0	0	0	0	0	0	0
rna-XM_016809204.1	LOC107885555	#N/A	0	0	0	0	0	0	0	0	0	0	0	0	0	0	0
rna-XM_008184701.1	LOC103309392	#N/A	0	0	0	0	0	1	0	0	0	0	0	1	0	0	0
MSTRG.17457.7	#N/A	#N/A	0	0	0	0	0	482	0	0	0	0	0	0	0	0	0
rna-XM_008189076.3	LOC100166174	uncharacterized LOC100166174	19	15	203	115	124	55	337	4	244	151	195	81	249	237	113
rna-XM_003242061.4	LOC100575248	zinc finger protein 184-like	296	543	498	582	425	325	431	646	455	224	186	272	358	335	631
rna-XR_001680535.2	LOC103311739	#N/A	0	0	0	0	0	0	0	0	0	0	0	0	0	0	0
rna-XM_029485770.1	LOC107885108	#N/A	37	19	0	0	0	0	0	0	0	0	0	0	0	0	0
rna-XM_001942607.4	LOC100166791	meteorin-like protein-like	892	1297	1121	1171	1509	1026	1094	1114	1111	1007	943	915	1059	1009	1426
rna-XM_016805052.2	LOC100573871	protein anon-73B1-like	79	60	92	365	329	72	45	165	328	126	130	182	44	282	466
rna-XM_008187406.2	LOC103310136	#N/A	0	0	1	2	4	1	0	2	0	1	2	0	0	0	3
MSTRG.22130.1	#N/A	#N/A	0	0	14	7	0	0	5	0	4	0	0	0	0	0	0
MSTRG.21489.3	#N/A	#N/A	81	83	40	19	29	64	79	45	35	85	82	43	37	19	27
MSTRG.5930.1	#N/A	#N/A	0	0	0	15	0	3	0	0	0	0	0	0	0	0	0
rna-XM_016805143.2	LOC100569227	uncharacterized LOC100569227	0	0	0	0	0	0	0	0	0	0	0	0	0	0	0
rna-XM_008183188.3	LOC100576058	uncharacterized LOC100576058	0	0	0	0	0	0	0	0	0	0	32	0	0	0	0
rna-XM_008181612.1	LOC103308369	#N/A	0	0	0	0	0	0	1	0	0	0	0	0	4	7	0
MSTRG.21751.1	#N/A	#N/A	205	162	90	64	71	166	93	80	64	58	152	87	73	55	89
MSTRG.21242.1	#N/A	#N/A	2	0	0	0	0	0	0	0	0	0	0	0	0	0	12
MSTRG.1468.1	#N/A	#N/A	0	0	0	0	1	0	1	0	1	0	0	21	0	0	0
rna-XM_016807757.2	LOC100575918	rhodopsin, GQ-coupled-like	0	0	0	0	0	0	5	0	0	0	0	0	0	0	0
rna-XM_001948962.1	LOC100164740	probable lysine-specific demethylase 4B-like	0	0	0	0	0	0	0	0	0	0	0	0	0	0	0
rna-XM_003242120.3	LOC100162256	MCT, pyruvate cytoplasm transporter	7270	6803	6816	840	4392	6359	7391	4070	314	5282	6032	3844	6998	193	4958
MSTRG.13068.3	#N/A	#N/A	0	7	0	0	0	31	0	0	0	0	0	0	0	0	0
rna-XM_008185589.3	LOC100165470	putative ankyrin repeat protein L59-like	30	17	39	16	50	26	45	33	27	7	42	25	6	30	44
rna-XM_016802111.2	LOC100163065	acetyl-coenzyme A transporter 1-like	89	6	18	4	70	75	50	9	0	48	64	29	0	4	32
rna-XM_029488891.1	LOC100160889	#N/A	1611	2075	1191	1657	2441	1650	1283	1126	1681	177	2315	1115	359	1249	2285
rna-XM_016805773.2	LOC100169592	kinesin-like protein unc-104	0	0	0	6	15	19	0	21	30	8	21	23	9	19	0
MSTRG.39.1	#N/A	#N/A	4	19	7	18	6	0	0	11	18	9	10	0	8	11	22
rna-XM_003242747.4	LOC100575220	uncharacterized LOC100575220	324	278	0	0	0	363	129	0	29	14	210	62	27	0	51
MSTRG.4770.1	#N/A	#N/A	9	4	9	11	13	3	11	9	7	3	6	4	12	11	20
rna-XR_003838683.1	LOC115033366	#N/A	0	0	0	0	0	0	0	0	0	0	0	0	0	0	0
rna-XM_003246401.3	LOC100166869	elongation factor G, mitochondrial-like	4572	3893	3272	4464	3686	3965	3629	3404	4729	1869	3623	3179	3119	3609	3699
rna-XM_008180044.3	LOC103307767	#N/A	1898	2656	3509	6016	4936	1925	2348	3797	6271	3064	2083	2812	2660	5567	4486
MSTRG.10973.5	#N/A	#N/A	0	0	0	0	0	0	0	0	0	172	0	209	0	1336	0
rna-XM_001943364.5	LOC100161023	uncharacterized LOC100161023	13	213	132	995	415	223	206	455	483	806	274	352	261	178	479
MSTRG.3528.1	#N/A	#N/A	7	0	0	0	0	2	0	0	5	0	14	0	0	2	0
MSTRG.11039.1	#N/A	#N/A	0	5	0	8	19	0	3	9	2	10	0	0	0	0	9
rna-XM_008185167.3	LOC100162696	phosphatidylcholine:ceramide cholinephosphotransferase 1-like	425	162	42	9	165	24	185	106	155	218	320	146	23	127	285
MSTRG.16014.1	#N/A	#N/A	0	0	0	5	0	0	284	8	0	0	0	0	6	0	0
rna-XM_008185191.3	LOC100168379	collagen alpha-2(IV) chain-like	14	1	41	0	8	2	7	15	5	0	3	1	32	21	10
rna-XM_029488754.1	LOC100572451	uncharacterized LOC100572451	3	0	0	0	0	0	0	0	0	0	0	0	0	0	777
rna-XM_029489188.1	LOC100574854	uncharacterized LOC100574854	59	0	9	0	0	2	13	0	11	0	0	17	0	0	18
rna-XM_001943826.5	LOC100161559	cation-independent mannose-6-phosphate receptor-like	102	104	301	631	475	114	167	338	469	422	123	138	188	531	536
gene-LOC100164888	LOC100164888	putative nuclease HARBI1-like	0	0	0	0	0	0	0	0	0	0	0	0	0	0	0
MSTRG.18519.1	#N/A	#N/A	2	28	10	8	14	6	5	5	2	2	6	10	20	25	5
rna-XM_016802995.2	LOC100160388	uncharacterized LOC100160388	17	4	599	3	3	657	5	46	1	2	4	2	10	157	4
rna-XM_008187362.1	LOC103310122	#N/A	0	0	0	0	2	0	0	0	0	0	0	0	0	4	0
rna-XM_003244286.4	LOC100568669	CD151 antigen-like	4	63	36	21	66	53	56	6	50	529	111	33	10	48	50
MSTRG.18622.6	#N/A	#N/A	0	0	0	606	0	0	0	0	2	0	0	0	0	0	13
MSTRG.24801.1	#N/A	#N/A	0	3	8	6	13	5	5	9	7	13	0	6	18	5	3
rna-XM_008181063.2	LOC103308152	#N/A	712	1018	313	148	292	646	569	449	147	1003	865	578	355	152	291
gene-LOC100571659	LOC100571659	probable tubulin polyglutamylase TTLL1-like	0	0	0	0	0	0	0	0	0	0	0	0	0	0	0
MSTRG.9979.5	#N/A	#N/A	133	208	244	439	194	79	108	215	314	289	144	175	276	430	288
MSTRG.9979.7	#N/A	#N/A	60	66	61	296	68	74	83	75	190	99	126	70	66	123	104
MSTRG.9979.6	#N/A	#N/A	93	48	212	97	299	96	182	231	395	0	101	0	163	214	308
MSTRG.5104.1	#N/A	#N/A	133	220	278	749	519	162	229	242	839	267	289	209	138	810	494
MSTRG.9979.8	#N/A	#N/A	49	65	191	39	141	49	95	133	216	0	38	0	68	135	95
rna-XM_029492421.1	LOC115034901	uncharacterized LOC115034901	0	0	0	0	0	0	0	0	0	0	0	0	0	0	0
MSTRG.14938.3	#N/A	#N/A	5	0	5	0	0	12	0	5	2	1	62	123	0	88	0
rna-XM_029487160.1	LOC100166690	Bardet-Biedl syndrome 4 protein homolog	0	3	12	136	40	21	0	19	0	0	0	3	10	60	81
MSTRG.11909.8	#N/A	#N/A	1	2	2	0	0	0	0	1	0	0	0	4007	0	0	1
rna-XM_029485083.1	LOC115033093	#N/A	0	0	0	0	0	0	0	0	0	0	0	0	0	0	0
rna-XM_029488309.1	LOC100574986	uncharacterized LOC100574986	117	1	0	389	465	1	1	0	0	137	193	0	182	606	482
MSTRG.8240.1	#N/A	#N/A	3	1009	896	2254	913	880	850	309	2397	0	0	935	721	552	497
MSTRG.11909.3	#N/A	#N/A	3	1654	86	136	1057	18	944	104	120	115	51	107	55	99	1601
MSTRG.8240.2	#N/A	#N/A	0	0	69	48	5	69	1	118	134	25	0	11	0	354	4
MSTRG.11909.6	#N/A	#N/A	0	0	1608	0	0	0	0	0	0	0	0	0	0	0	0
MSTRG.2943.1	#N/A	#N/A	0	2	0	1	3	0	0	0	3	23	5	5	7	4	0
MSTRG.11909.4	#N/A	#N/A	29	1	1	1123	322	96	268	29	921	50	1	67	256	265	578
MSTRG.11909.5	#N/A	#N/A	1634	2784	105	4097	1537	988	3347	4067	3205	2897	2013	145	4302	2693	738
MSTRG.21870.1	#N/A	#N/A	0	22	0	0	0	0	4	0	0	0	5	4	0	0	0
MSTRG.9606.1	#N/A	#N/A	4	0	0	0	0	0	0	0	3	0	13	4	5	0	0
MSTRG.23831.13	#N/A	#N/A	62	0	52	66	73	0	0	8	25	101	8	0	0	61	113
MSTRG.25344.1	#N/A	#N/A	4	11	4	17	5	4	1	3	6	11	1	4	4	6	17
rna-XR_119608.4	LOC100568710	possible pseudogene or miscRNA, No KEGG entry	173	198	295	360	467	153	157	293	383	217	197	233	575	366	269
MSTRG.10230.1	#N/A	#N/A	0	12	0	8	4	6	5	9	12	8	8	12	9	12	6
rna-XM_008187343.3	LOC100160121	uncharacterized LOC100160121	4305	1054	211	97	848	1154	970	194	63	98	1368	902	46	0	611
rna-XM_001950710.5	LOC100167947	stress-induced-phosphoprotein 1-like	15771	21128	21332	25948	20084	12944	20340	22819	24645	12531	15934	19136	19502	20637	18842
MSTRG.16584.1	#N/A	#N/A	6	20	0	0	4	0	6	0	4	0	2	8	1	0	0
rna-XM_029490622.1	LOC100165913	far upstream element-binding protein 1-like	199	2	0	0	337	262	213	1	0	0	83	0	1	0	2
rna-XM_029485300.1	LOC115033182	#N/A	0	0	0	0	0	0	0	0	0	0	0	0	0	0	0
MSTRG.23831.12	#N/A	#N/A	7	1	68	39	57	16	10	7	62	15	1	0	17	22	7
rna-XM_001951490.5	LOC100165836	uncharacterized LOC100165836	2091	2669	1625	1682	1580	1816	1625	1359	1180	1413	2144	1624	1495	1518	1374
rna-XM_029486293.1	LOC103310681	#N/A	0	0	0	3	0	0	0	0	0	0	0	0	0	1	0
MSTRG.3130.1	#N/A	#N/A	0	0	0	0	17	0	0	0	0	0	0	0	0	0	0
MSTRG.16622.3	#N/A	#N/A	62	7	48	53	199	106	9	39	78	128	144	84	52	27	60
rna-XM_029490292.1	LOC103308876	#N/A	0	0	0	10	11	0	0	0	6	4	0	0	0	11	6
rna-XM_003243238.4	LOC100574786	ring canal kelch homolog	0	0	0	0	0	0	0	0	0	0	0	0	0	0	0
rna-XM_008187353.3	LOC100164149	transcription factor Ken-like	0	377	0	5	0	212	0	0	0	597	148	0	203	0	5
rna-XM_029487255.1	LOC100168909	uncharacterized LOC100168909	68	160	73	424	345	1	215	253	358	200	28	52	55	563	206
rna-XM_029490561.1	LOC100575370	leucine-rich repeat-containing protein 4B-like	0	0	0	0	0	0	0	0	0	0	0	0	0	0	0
rna-XM_003240933.4	LOC100570172	uncharacterized LOC100570172	2908	1572	291	30	2566	4604	1305	281	25	1462	5628	1631	176	6	713
MSTRG.19434.1	#N/A	#N/A	2	2	13	10	6	1	1	5	12	1	4	3	4	10	9
MSTRG.24424.3	#N/A	#N/A	48	40	27	2	14	59	1	0	0	0	36	3	23	0	23
rna-XM_029487925.1	LOC100161233	gonadotropin-releasing hormone II receptor-like	611	705	329	136	284	543	422	295	202	143	648	332	317	220	286
rna-XM_001944287.5	LOC100159528	39S ribosomal protein L9, mitochondrial-like	2346	2631	2475	3359	2689	2090	2282	2315	3693	1273	2300	2401	2124	3045	2792
MSTRG.21992.3	#N/A	#N/A	837	535	1875	3595	764	2811	2054	910	838	597	2204	2147	2383	3248	614
rna-XM_016804844.2	LOC100162459	uncharacterized LOC100162459	0	5	0	6	164	0	0	0	14	55	0	5	7	0	242
rna-XM_003240307.4	LOC100575022	uncharacterized LOC100575022	102	69	16	31	39	75	22	18	22	54	29	18	22	34	40
MSTRG.12321.3	#N/A	#N/A	0	0	0	0	0	0	0	0	919	0	0	0	134	481	0
gene-LOC115034562	LOC115034562	#N/A	0	187	0	0	0	0	0	0	0	0	0	110	0	0	0
MSTRG.12330.11	#N/A	#N/A	0	0	492	1281	780	1101	0	0	124	0	0	0	0	624	0
rna-XM_001948430.4	LOC100160009	putative ankyrin repeat protein R840-like	10	5	0	0	0	4	0	0	0	4	0	5	0	0	0
MSTRG.1289.1	#N/A	#N/A	0	0	0	0	0	0	0	0	0	9	0	0	0	0	0
rna-XM_029492562.1	LOC115034960	#N/A	0	0	0	0	0	0	0	0	0	0	0	0	0	0	0
MSTRG.17277.1	#N/A	#N/A	68	56	25	64	66	92	107	29	60	52	72	67	29	72	41
rna-XM_008191235.1	LOC103311574	#N/A	0	0	0	0	0	0	0	0	0	0	0	0	0	0	0
rna-XM_001950429.5	LOC100162122	calcium homeostasis endoplasmic reticulum protein-like	591	930	976	1415	1041	930	1376	1135	814	568	597	1348	1363	655	1328
rna-XM_016806446.2	LOC100161243	acireductone dioxygenase-like	183	112	40	51	42	63	76	34	76	38	61	81	44	57	23
rna-XM_016801898.2	LOC100161483	sterile alpha and TIR motif-containing protein 1-like	0	0	0	0	0	0	0	0	0	0	0	0	0	0	0
rna-XM_001949176.5	LOC100168729	uncharacterized protein CG7816-like	159	344	281	0	42	288	125	0	1	0	275	188	0	0	177
MSTRG.6507.1	#N/A	#N/A	165	27	18	60	226	215	4	4	25	57	303	11	4	21	94
rna-XM_016803274.2	LOC100160789	uncharacterized LOC100160789	0	0	0	0	0	0	0	5	0	0	0	0	0	0	0
rna-XM_029485828.1	LOC100569295	uncharacterized LOC100569295	0	0	0	0	0	0	0	0	0	0	0	0	0	0	0
MSTRG.4758.1	#N/A	#N/A	31	0	9	0	0	8	5	12	0	0	0	0	0	0	0
MSTRG.17799.2	#N/A	#N/A	0	1660	1394	0	377	1742	1728	1722	3251	297	394	201	0	302	219
rna-XM_029485573.1	LOC100164132	possible pseudogene or miscRNA, No KEGG entry	0	0	0	0	0	0	0	0	0	0	0	0	0	0	0
MSTRG.20324.1	#N/A	#N/A	0	28	0	48	0	0	1	47	0	1	0	2	0	33	0
MSTRG.18270.1	#N/A	#N/A	329	201	235	741	658	312	214	209	316	402	247	231	258	453	373
rna-XM_029489422.1	LOC100167907	uncharacterized LOC100167907	0	0	0	0	0	0	0	0	0	0	0	0	0	0	0
rna-XM_003241838.3	LOC100165676	laccase-1-like	0	0	0	0	0	231	0	0	0	0	0	0	0	0	0
MSTRG.24512.1	#N/A	#N/A	20	0	0	0	12	0	1	0	6	5	0	4	0	9	0
gene-LOC115033963	LOC115033963	#N/A	0	0	3	0	0	0	2	0	1	0	0	0	0	0	0
rna-XR_119492.4	LOC100571941	possible pseudogene or miscRNA, No KEGG entry	834	835	484	412	493	744	611	499	393	260	769	556	495	373	402
MSTRG.22456.1	#N/A	#N/A	8	28	24	15	26	8	2	26	24	8	17	14	29	20	35
rna-XM_016805483.2	LOC100160646	proton-coupled folate transporter-like	0	0	0	0	0	0	1	0	0	0	0	0	45	0	0
rna-XM_003244783.4	LOC100160095	Asparaginase	2419	1783	2086	938	1869	2511	2337	2263	546	2191	2421	2374	2255	521	1014
MSTRG.263.1	#N/A	#N/A	18	30	19	19	0	4	2	25	5	28	12	11	5	10	21
MSTRG.5134.1	#N/A	#N/A	8	6	14	38	17	20	6	10	73	9	12	2	6	102	42
rna-XR_003838737.1	LOC107883865	#N/A	27	29	9	23	12	26	17	0	35	11	24	18	7	25	5
MSTRG.15007.3	#N/A	#N/A	452	378	0	116	188	195	141	191	172	341	167	278	95	308	138
MSTRG.15007.2	#N/A	#N/A	77	116	14	72	87	27	2	134	129	90	90	42	3	120	86
rna-XM_003244793.4	LOC100571233	uncharacterized LOC100571233	288	319	350	861	521	247	256	529	651	603	197	367	670	609	687
rna-XM_029490862.1	LOC100576028	zinc finger MYND domain-containing protein 10-like	0	0	0	0	0	0	0	0	0	5	0	0	0	0	0
MSTRG.11291.1	#N/A	#N/A	0	0	0	58	19	0	9	0	46	14	2	5	0	68	22
MSTRG.24424.6	#N/A	#N/A	76	64	24	0	23	38	0	0	0	0	33	48	34	0	25
MSTRG.13209.1	#N/A	#N/A	5	0	2	3	13	21	13	17	27	0	0	3	9	0	29
rna-XM_029490575.1	LOC100572794	leucine-rich repeat-containing protein 15-like	0	0	0	0	0	0	0	0	0	0	0	0	0	0	0
MSTRG.19588.1	#N/A	#N/A	0	6	0	6	18	2	0	0	8	0	0	7	0	4	2
rna-XM_029487241.1	LOC115033729	#N/A	0	0	0	0	0	0	0	0	0	0	0	0	0	0	0
MSTRG.5611.1	#N/A	#N/A	2	2	1	12	28	22	0	2	6	3	5	2	0	2	21
rna-NM_001326678.1	LOC100573711	SRR1-like protein-like	340	337	293	870	607	379	350	413	802	236	380	307	235	761	467
MSTRG.8609.4	#N/A	#N/A	0	3	0	0	1	2	0	0	1	13	0	0	1	0	1
rna-XR_510796.3	LOC103309666	#N/A	31	54	56	108	69	36	24	72	48	32	15	32	61	55	103
MSTRG.14493.1	#N/A	#N/A	0	0	0	0	22	0	0	0	0	3	0	0	0	0	11
rna-XM_029485378.1	LOC100162464	uncharacterized LOC100162464	8	12	6	4	18	13	10	10	7	0	0	6	0	8	5
rna-XM_008186524.2	LOC100163032	small G protein signaling modulator 3 homolog	643	161	422	1890	81	6	118	248	990	58	870	455	559	479	1451
MSTRG.3191.1	#N/A	#N/A	12	6	11	29	18	18	6	21	52	16	9	6	10	28	40
rna-XM_001944043.5	LOC100167107	vinculin-like	1475	1617	1080	73	578	1624	1232	1361	763	1485	1550	923	1064	8	1682
MSTRG.6178.1	#N/A	#N/A	35	0	0	17	29	61	5	0	24	27	20	2	2	4	27
rna-XM_029485099.1	LOC115033100	#N/A	0	0	0	0	0	6	0	0	0	0	0	0	0	0	0
rna-XM_008182767.1	LOC103308760	#N/A	0	0	0	0	0	0	0	0	0	0	0	0	0	0	0
MSTRG.12760.1	#N/A	#N/A	1	0	0	2	0	1	14	0	2	1	5	3	0	1	3
rna-XR_003839296.1	LOC115033950	#N/A	0	1	0	0	1	0	0	0	0	0	0	1	0	2	0
rna-XM_008185502.3	LOC103309617	#N/A	488	236	65	38	87	633	149	39	146	115	386	92	89	94	163
rna-XM_008186540.3	LOC100160639	uncharacterized LOC100160639	314	2438	1816	3074	2542	608	1794	37	3252	371	1114	180	1636	2781	247
MSTRG.19767.1	#N/A	#N/A	109	108	79	44	75	74	77	35	36	162	94	108	39	54	17
MSTRG.20226.2	#N/A	#N/A	179	175	115	97	114	156	108	95	91	169	280	175	0	66	0
rna-XM_016808633.2	LOC100168736	sestrin-3-like	251	113	0	103	89	400	88	0	0	0	278	86	0	196	0
MSTRG.6486.1	#N/A	#N/A	26	65	52	40	20	29	57	47	33	16	26	28	43	55	17
rna-XM_029486859.1	LOC100575249	origin recognition complex subunit 2-like	356	312	52	79	28	56	0	65	7	2	95	93	48	3	2
MSTRG.6416.1	#N/A	#N/A	0	0	0	0	12	0	2	0	1	0	0	0	0	3	3
rna-XM_016808524.2	LOC107885092	#N/A	0	14	0	0	14	6	4	12	14	0	7	0	0	8	17
MSTRG.16697.5	#N/A	#N/A	0	0	0	0	0	0	0	0	0	0	3357	0	0	0	0
MSTRG.16697.4	#N/A	#N/A	0	0	0	0	0	0	0	0	7816	0	0	0	0	0	0
rna-XM_016806496.2	LOC100168409	uncharacterized LOC100168409	153	10	68	102	122	184	178	3	126	9	0	104	213	146	114
rna-XM_029489304.1	LOC100163840	arylsulfatase B-like	123	54	0	73	200	118	14	22	58	67	122	42	0	45	174
rna-XM_008191319.1	LOC103311640	#N/A	0	0	0	0	0	0	0	0	0	0	0	0	0	0	0
MSTRG.16697.3	#N/A	#N/A	0	0	0	0	0	0	3762	0	0	0	0	0	0	0	0
rna-NM_001161985.2	LOC100160800	elongator complex protein 4-like	734	1339	1324	1932	1414	751	1041	1439	1884	1341	1207	1340	1085	1877	1603
MSTRG.5088.1	#N/A	#N/A	208	115	4	6	33	216	87	78	61	7	175	113	0	4	64
MSTRG.5088.2	#N/A	#N/A	35	0	0	0	0	0	0	0	0	0	0	11	0	0	0
rna-XR_003839022.1	LOC115033719	#N/A	2	4	0	0	0	4	0	0	0	0	0	0	2	0	0
MSTRG.9552.1	#N/A	#N/A	4	0	0	2	0	5	1	4	9	9	3	0	0	0	21
MSTRG.17061.11	#N/A	#N/A	0	0	0	0	0	0	101	510	0	312	0	544	165	0	0
MSTRG.17061.10	#N/A	#N/A	0	0	0	0	0	0	0	475	0	0	0	0	0	0	0
rna-XM_029487810.1	LOC100167995	uncharacterized LOC100167995	0	0	10	6	0	0	0	0	3	0	150	0	4	0	0
MSTRG.1615.1	#N/A	#N/A	37	9	31	87	77	45	32	30	101	53	30	16	21	80	0
MSTRG.21791.1	#N/A	#N/A	51	67	119	90	98	78	86	100	103	66	47	144	53	93	105
MSTRG.25201.1	#N/A	#N/A	33	55	45	72	25	40	51	62	47	25	32	17	25	17	49
MSTRG.761.5	#N/A	#N/A	0	0	0	0	17	20	0	0	4	29	0	0	0	21	5
rna-XM_029487266.1	LOC100572191	zinc finger protein GLIS2 homolog	19	0	45	278	57	59	23	30	75	78	21	0	0	39	82
rna-XM_029488455.1	LOC100162539	PDZ and LIM domain protein Zasp-like	166	120	11	2	104	178	17	0	0	2	101	88	3	9	30
rna-XM_003244956.4	LOC100570920	uncharacterized LOC100570920	236	378	399	852	664	328	352	432	1065	403	258	343	392	749	753
MSTRG.8652.1	#N/A	#N/A	5	0	0	0	0	0	5	19	0	7	10	2	0	0	0
MSTRG.3604.2	#N/A	#N/A	16	0	0	0	0	0	0	0	0	0	0	0	0	0	0
MSTRG.3643.1	#N/A	#N/A	1	0	0	6	0	2	0	0	12	0	1	0	0	0	0
rna-XM_029489842.1	LOC107884469	#N/A	0	0	0	0	0	0	0	0	0	0	0	0	0	0	0
rna-XM_001951006.5	LOC100164991	uncharacterized LOC100164991	776	932	945	1190	1017	679	994	977	990	858	649	500	893	854	1126
MSTRG.20783.5	#N/A	#N/A	97	0	0	0	0	0	0	0	0	0	0	0	0	0	0
MSTRG.6392.6	#N/A	#N/A	91	170	39	360	161	45	80	273	84	600	50	82	339	388	88
rna-XM_029489943.1	LOC103309706	#N/A	3	0	0	0	6	4	0	0	3	5	3	0	0	8	3
rna-XM_003243063.4	LOC100573097	uncharacterized LOC100573097	0	0	0	0	0	0	5	0	0	0	0	0	0	0	0
MSTRG.25215.1	#N/A	#N/A	91	145	131	46	123	48	112	87	59	62	104	88	171	53	44
MSTRG.11748.1	#N/A	#N/A	0	0	1	6	3	0	0	0	3	11	0	0	0	4	0
MSTRG.23685.1	#N/A	#N/A	225	133	99	193	172	119	109	60	176	168	106	134	29	196	150
MSTRG.4551.2	#N/A	#N/A	3	7	8	2	14	5	5	5	1	11	5	5	6	1	18
MSTRG.4391.1	#N/A	#N/A	3	10	13	42	29	4	7	12	38	18	4	13	4	35	22
rna-XR_003839502.1	LOC107884044	#N/A	0	0	6	3	0	0	2	0	6	0	3	0	0	0	6
gene-LOC115033088	LOC115033088	#N/A	0	0	0	0	0	0	0	0	0	0	0	0	0	0	0
rna-XM_029491755.1	LOC100158841	leucine zipper putative tumor suppressor 2 homolog	246	227	674	630	882	171	545	651	720	408	161	215	788	1003	285
MSTRG.17100.1	#N/A	#N/A	3	3	8	14	6	2	1	20	7	2	1	10	3	8	5
MSTRG.2399.1	#N/A	#N/A	0	0	9	12	24	0	0	7	25	22	4	5	2	46	21
MSTRG.1495.1	#N/A	#N/A	0	0	0	0	13	0	0	0	0	0	0	0	0	0	10
rna-XR_119059.4	LOC100574201	possible pseudogene or miscRNA, No KEGG entry	4	6	0	0	0	8	0	7	0	9	0	6	0	3	2
rna-XM_001945709.5	LOC100161836	uncharacterized LOC100161836	303	120	436	267	1149	3	395	572	361	123	0	438	110	15	231
rna-TRNAL-AAG-3	TRNAL-AAG	#N/A	0	0	0	0	0	0	0	0	0	0	0	0	0	0	0
MSTRG.7972.2	#N/A	#N/A	27	28	39	164	215	25	27	170	110	19	22	74	77	166	95
MSTRG.7972.3	#N/A	#N/A	57	119	94	59	165	146	35	32	107	60	130	26	23	116	90
gene-LOC100575764	LOC100575764	possible pseudogene or miscRNA, No KEGG entry	0	0	17	0	0	0	9	0	0	10	0	27	0	13	30
rna-XM_016809012.2	LOC100163900	cytochrome P450 6k1-like	24	1	1	1	3	27	20	1	23	1	18	3	17	1	0
MSTRG.12972.11	#N/A	#N/A	0	0	0	0	0	0	0	0	0	3327	0	0	0	0	0
MSTRG.12972.10	#N/A	#N/A	4198	8256	0	1406	6944	412	0	0	2821	6014	3699	1858	0	2686	3336
MSTRG.12972.12	#N/A	#N/A	0	0	0	3525	24	0	99	0	28	0	0	0	0	18	0
rna-XM_029492612.1	LOC115034987	#N/A	4	0	0	0	0	4	0	0	0	0	3	7	2	0	0
rna-XM_001949140.5	LOC100160494	28S ribosomal protein S33, mitochondrial-like	2505	2104	1781	2949	3035	1839	1859	1752	3661	1400	2151	2243	1610	2981	3116
rna-XM_003240137.4	LOC100164052	prestin-like, active transporters; similar to sulfate transporter	671	767	706	175	200	397	648	191	192	0	1095	781	126	0	0
rna-XM_008184904.1	LOC103309447	#N/A	0	0	0	0	0	0	0	0	0	0	0	0	0	0	0
rna-XM_029487688.1	LOC100160558	ATP-binding cassette sub-family G member 1-like	69	138	269	78	523	127	163	364	89	164	631	85	275	87	87
MSTRG.25380.3	#N/A	#N/A	0	7	6	9	1	2	11	78	2	21	0	79	8	2	9
rna-XM_016807317.2	LOC100163270	e3 ubiquitin-protein ligase RING2-like	1005	585	192	189	194	709	336	159	173	136	585	296	142	133	128
MSTRG.19252.1	#N/A	#N/A	65	29	108	358	322	83	39	134	398	159	43	31	94	370	287
MSTRG.25252.1	#N/A	#N/A	11	8	3	5	7	15	9	1	7	2	13	7	3	7	3
rna-XM_016800438.2	LOC107882297	#N/A	5	0	0	0	0	7	0	0	0	0	4	0	0	0	13
MSTRG.20735.1	#N/A	#N/A	13	5	0	0	0	10	0	1	0	4	6	3	0	0	0
MSTRG.1033.1	#N/A	#N/A	0	4	12	59	30	0	16	8	78	8	0	0	8	58	21
rna-XM_029486847.1	LOC100160715	uncharacterized LOC100160715	0	143	0	0	0	0	0	0	0	0	0	0	0	0	0
MSTRG.8426.1	#N/A	#N/A	6	4	0	1	9	7	6	0	2	0	3	15	0	4	0
rna-XM_008188968.3	LOC100160394	Phosphoglycerate dehydrogenase	42	0	39	111	16	10	8	26	128	22	0	0	6	80	59
rna-XM_016803822.2	LOC100573804	uncharacterized LOC100573804	0	0	0	0	0	3	0	0	0	6	0	0	0	0	5
rna-XR_003839259.1	LOC115033908	#N/A	29	5	0	17	0	14	0	0	19	8	21	18	0	11	0
MSTRG.4385.1	#N/A	#N/A	0	0	37	56	27	0	0	22	25	55	0	0	17	26	27
rna-XM_016808919.1	LOC107885301	#N/A	0	0	0	0	0	0	0	0	0	0	0	0	0	0	0
rna-XM_008184956.1	LOC103309465	#N/A	3	5	0	0	13	0	2	6	7	5	0	7	0	13	2
MSTRG.5837.1	#N/A	#N/A	6	28	5	24	20	28	3	15	20	12	8	13	23	11	11
rna-XM_029486795.1	LOC115033671	#N/A	0	0	0	0	0	0	0	0	0	0	0	0	0	0	0
MSTRG.2385.3	#N/A	#N/A	0	0	608	0	0	0	0	0	0	0	0	0	2978	0	0
MSTRG.23611.1	#N/A	#N/A	1	5	0	0	1	0	24	0	4	0	1	0	0	3	0
rna-XM_016801020.2	LOC100162521	type I inositol-3,4-bisphosphate 4-phosphatase-like	0	0	0	0	0	0	0	0	0	0	0	0	0	0	0
MSTRG.13151.3	#N/A	#N/A	0	121	7	115	9	22	0	0	9	17	0	0	11	101	0
rna-XM_001950700.5	LOC100162741	uncharacterized LOC100162741	967	1455	244	42	165	971	545	236	37	30	1020	500	142	65	56
rna-XM_008190483.3	LOC100162039	innexin shaking-B-like	0	0	0	0	76	0	0	0	0	0	0	0	0	0	0
MSTRG.10583.1	#N/A	#N/A	0	0	0	0	2	0	0	0	5	10	5	0	0	4	0
rna-XM_016804125.2	LOC100569254	putative methyltransferase 235L-like	0	0	183	0	0	309	0	0	0	0	0	0	97	106	65
rna-XM_029491415.1	LOC100161361	TBC domain-containing protein kinase-like protein-like	0	0	309	0	0	0	0	0	0	0	0	0	0	0	0
rna-XM_008191294.1	LOC103311621	#N/A	0	0	0	0	0	0	0	0	3	0	0	0	0	0	0
MSTRG.14183.6	#N/A	#N/A	1	0	0	0	0	3	0	0	0	0	14	0	0	0	0
rna-XM_008180220.3	LOC100159566	talin-1-like	522	473	406	665	726	518	385	485	553	452	556	246	341	427	656
rna-XR_003840183.1	LOC115035011	#N/A	0	0	0	0	0	5	0	0	0	0	0	0	0	0	2
rna-XR_003838642.1	LOC115033312	#N/A	0	0	0	0	0	0	0	0	0	0	0	0	0	0	0
MSTRG.23182.1	#N/A	#N/A	0	0	5	0	2	3	2	0	0	12	9	0	3	7	5
rna-XM_016805321.2	LOC100160269	THO complex subunit 1-like	0	0	0	771	269	0	18	0	0	0	0	1159	42	0	0
MSTRG.24084.1	#N/A	#N/A	13	0	0	1	4	3	0	3	0	0	5	3	0	2	0
rna-XM_008190101.1	LOC103310780	#N/A	0	0	0	0	0	0	0	0	0	0	0	0	0	0	0
rna-XM_016802820.1	LOC100168068	2-oxoglutarate dehydrogenase, mitochondrial-like	2766	4	0	136	0	0	0	0	0	0	0	0	0	0	0
MSTRG.24105.2	#N/A	#N/A	0	0	0	176	12	0	0	0	49	18	10	57	0	29	25
MSTRG.24105.1	#N/A	#N/A	93	69	68	44	148	51	32	98	278	119	41	10	107	319	129
MSTRG.16471.1	#N/A	#N/A	9	6	2	11	0	17	4	8	1	3	6	9	0	3	6
rna-XM_029486334.1	LOC115033556	#N/A	5	0	0	0	4	10	0	3	0	0	6	0	0	0	0
MSTRG.4157.1	#N/A	#N/A	15	17	10	11	12	13	31	13	5	29	5	16	4	22	8
MSTRG.6057.1	#N/A	#N/A	17	0	10	12	2	0	2	0	8	6	0	4	0	7	7
MSTRG.20885.39	#N/A	#N/A	0	53	93	132	133	92	99	0	207	50	0	167	73	0	146
MSTRG.20885.38	#N/A	#N/A	11	168	56	5	14	103	0	4	2	124	0	0	101	0	9
MSTRG.7794.8	#N/A	#N/A	17	56	72	38	35	17	25	16	64	66	9	29	40	76	49
rna-XM_008188485.3	LOC100166624	putative gustatory receptor 64f-like	55	61	16	0	79	43	46	23	42	59	51	24	9	50	42
MSTRG.20885.35	#N/A	#N/A	0	0	0	0	0	0	0	128	0	0	0	0	0	0	0
MSTRG.7794.7	#N/A	#N/A	10	130	117	15	380	32	397	420	18	28	359	262	22	34	461
MSTRG.7794.4	#N/A	#N/A	102	0	0	0	0	119	0	0	0	298	0	0	0	321	0
MSTRG.7794.5	#N/A	#N/A	0	417	0	116	0	0	0	3	0	94	0	0	391	43	13
MSTRG.20885.31	#N/A	#N/A	0	0	0	0	38	0	0	60	0	0	0	0	25	46	0
MSTRG.7794.3	#N/A	#N/A	90	0	511	52	294	88	319	514	4	0	272	234	0	0	312
rna-XM_008186996.1	LOC103310017	#N/A	0	0	0	0	0	0	0	0	0	0	0	0	0	0	0
MSTRG.7794.1	#N/A	#N/A	223	2	0	76	0	0	0	0	261	88	0	0	20	41	0
MSTRG.19151.1	#N/A	#N/A	0	3	0	0	0	0	0	0	0	9	0	0	0	0	0
rna-XM_016800402.2	LOC100575990	uncharacterized LOC100575990	0	0	0	0	0	0	0	0	0	0	0	0	0	0	0
rna-XR_003838743.1	LOC107884462	#N/A	0	0	0	0	1	0	1	1	2	0	0	0	0	0	1
MSTRG.23605.1	#N/A	#N/A	47	102	31	38	6	20	50	36	37	57	12	54	20	28	28
MSTRG.16724.1	#N/A	#N/A	75	83	72	69	33	39	58	90	34	56	51	70	84	23	61
rna-XM_029486857.1	LOC100160956	transmembrane and TPR repeat-containing protein 4-like	0	0	18	153	137	88	0	0	127	70	4	34	0	112	82
rna-XM_008189587.3	LOC100163122	uncharacterized LOC100163122	59	59	42	30	53	31	29	10	4	179	106	48	43	12	25
rna-XM_016806498.2	LOC100572046	uncharacterized LOC100572046	0	0	0	0	0	0	0	0	0	0	0	0	0	0	0
MSTRG.9453.22	#N/A	#N/A	326	51	15	161	109	151	22	6	84	320	143	93	1	143	188
MSTRG.9453.21	#N/A	#N/A	25	27	0	237	0	0	0	0	0	396	110	10	6	267	126
MSTRG.9453.20	#N/A	#N/A	224	5	0	148	606	402	0	53	0	89	63	89	0	141	335
rna-XM_029488061.1	LOC100167273	uncharacterized LOC100167273	0	3	0	4	7	0	0	0	0	0	0	0	1	0	0
rna-XM_029490971.1	LOC100168581	monocarboxylate transporter 10-like, MCT, pyruvate cytoplasm transporter	0	0	34	25	0	0	0	0	0	0	0	46	27	0	0
MSTRG.880.1	#N/A	#N/A	87	27	2	0	16	107	16	10	3	0	67	16	3	3	21
MSTRG.16553.2	#N/A	#N/A	43	17	22	58	82	29	59	48	25	28	81	0	0	39	47
gene-LOC103310645	LOC103310645	#N/A	1	1	0	2	0	1	2	1	0	0	0	0	1	0	0
rna-XR_003838999.1	LOC115033696	#N/A	0	0	0	0	0	0	0	0	0	0	0	0	0	0	0
rna-XR_119384.4	LOC100569630	possible pseudogene or miscRNA, No KEGG entry	13	17	134	56	27	26	28	17	69	0	99	13	23	32	26
MSTRG.13114.1	#N/A	#N/A	130	154	176	167	113	109	169	147	113	154	121	124	151	108	88
MSTRG.9206.1	#N/A	#N/A	335	198	80	155	102	395	142	132	112	132	378	289	179	94	102
rna-XM_016800923.2	LOC100168132	uncharacterized LOC100168132	381	1365	1180	794	724	529	1069	869	556	290	506	952	424	647	1818
MSTRG.16416.1	#N/A	#N/A	0	0	3	1	0	0	0	8	3	10	2	2	8	4	0
MSTRG.6677.1	#N/A	#N/A	16	0	0	0	0	0	0	0	0	0	0	0	0	0	0
MSTRG.4377.4	#N/A	#N/A	0	0	0	1	0	0	0	19	0	0	0	0	0	0	0
rna-XR_003839730.1	LOC115034365	#N/A	0	0	0	1	1	0	0	1	1	2	1	0	0	3	1
rna-XM_001950858.4	LOC100163626	pre-mRNA-processing factor 40 homolog B-like	319	1944	1933	4254	935	1114	1573	673	4342	2249	1339	1999	1618	3587	3359
MSTRG.20296.4	#N/A	#N/A	0	0	0	84	319	331	0	0	0	0	0	0	0	0	0
rna-XM_029487302.1	LOC100570412	possible pseudogene or miscRNA, No KEGG entry	38	18	25	33	51	32	22	39	43	65	62	10	46	16	30
MSTRG.7290.5	#N/A	#N/A	902	384	250	253	182	917	813	238	184	151	126	1022	1246	212	447
MSTRG.7290.4	#N/A	#N/A	0	0	0	0	0	0	0	0	197	0	0	0	0	0	328
MSTRG.7290.3	#N/A	#N/A	308	0	1	235	0	220	536	9	1	45	4	174	0	139	1
rna-XR_001679225.2	LOC103308965	#N/A	0	20	14	0	9	0	6	4	0	9	0	6	5	5	0
rna-XM_003243867.4	LOC100574123	uncharacterized LOC100574123	1403	2521	392	103	86	1119	1279	367	92	5	1150	923	352	75	152
rna-XM_001947732.4	LOC100164920	probable ATP-dependent RNA helicase DHX36-like	2626	3980	3700	6319	4567	2797	3503	4582	5497	2882	2865	2947	3554	4620	4600
MSTRG.4184.1	#N/A	#N/A	0	0	0	0	13	0	0	0	4	0	0	0	0	0	0
rna-NM_001126143.2	Cpvl	carboxypeptidase, vitellogenic-like (EC:3.4.16.-)	12702	15608	12063	10357	13691	10487	14272	13849	11915	13764	13693	11982	15286	11047	9237
rna-XM_001950923.5	LOC100164491	UPF0468 protein C16orf80 homolog	0	0	0	0	0	0	0	0	0	0	0	0	0	0	0
rna-XR_003839977.1	LOC115034644	#N/A	0	0	0	0	0	0	0	0	0	0	0	0	0	0	0
rna-XM_008190115.1	LOC103310794	#N/A	0	0	0	0	0	0	0	0	0	0	0	0	0	0	0
rna-XM_001947379.5	LOC100168058	uncharacterized LOC100168058	12	0	7	32	82	22	3	6	45	18	25	0	21	46	79
MSTRG.20019.1	#N/A	#N/A	40	8	3	0	5	13	4	9	5	0	16	13	0	0	7
MSTRG.23152.1	#N/A	#N/A	0	3	4	7	6	2	0	7	9	17	0	11	7	5	8
rna-XM_029491856.1	LOC100575389	uncharacterized LOC100575389	9	4	3	2	3	4	0	0	0	0	4	0	0	0	5
rna-XM_001950476.5	LOC100169306	putative riboflavin kinase-like	318	522	19	827	381	339	143	607	800	25	285	474	89	653	277
rna-XR_003839070.1	LOC100574887	uncharacterized LOC100574887	1	1	0	1	5	2	1	3	0	3	2	1	0	0	15
rna-NM_001134928.1	Catb-16d2	cathepsin B-16D2	3208	110	123	62	228	5082	118	177	175	267	4924	675	494	162	140
rna-XM_008186970.3	LOC100160359	uncharacterized LOC100160359	685	152	85	1013	18	88	390	825	1272	80	140	14	869	12	838
MSTRG.21374.5	#N/A	#N/A	0	0	0	0	0	17	0	0	0	0	0	0	0	0	0
rna-XM_029492830.1	LOC115035142	#N/A	0	0	0	0	0	0	0	0	0	0	0	0	0	0	0
rna-TRNAD-GUC-13	TRNAD-GUC	#N/A	0	0	0	0	0	0	0	0	0	0	0	0	0	0	0
MSTRG.11635.4	#N/A	#N/A	129	0	77	919	396	48	0	133	142	25	772	0	77	125	0
MSTRG.19047.2	#N/A	#N/A	3773	1223	219	142	47	3323	747	281	0	320	3100	30	103	4495	8
MSTRG.25474.1	#N/A	#N/A	4	0	0	0	5	2	4	5	11	1	0	13	0	8	5
rna-XR_001679306.2	LOC100575253	uncharacterized protein C11orf46 homolog	34	54	20	22	28	28	32	17	17	19	28	45	22	12	25
rna-XM_016807752.2	LOC100575548	mediator of RNA polymerase II transcription subunit 15-like	0	9	0	16	0	0	0	0	32	0	0	0	0	10	0
rna-XM_016804528.2	LOC100164648	uncharacterized LOC100164648	0	0	0	0	0	0	0	0	0	0	0	0	0	0	0
rna-XM_029492806.1	LOC100569025	lysine-specific demethylase 4A-like	0	0	0	0	0	0	0	0	0	0	0	0	0	0	0
MSTRG.13392.1	#N/A	#N/A	100	159	153	218	228	136	109	134	186	296	172	64	75	104	261
MSTRG.18878.9	#N/A	#N/A	168	0	348	0	668	0	283	543	0	211	0	0	0	0	0
MSTRG.13178.10	#N/A	#N/A	975	979	194	2038	1555	444	577	523	1222	403	497	731	572	125	1526
rna-XM_008188315.3	LOC100161644	UDP-glucose 4-epimerase-like	233	225	120	192	332	141	1411	253	340	99	185	83	1271	234	366
rna-XM_001952077.5	LOC100166667	zinc finger CCCH domain-containing protein 11A-like	1254	1062	797	1146	1155	1200	818	700	1179	786	1271	696	475	831	579
rna-XR_003840253.1	LOC100571348	possible pseudogene or miscRNA, No KEGG entry	0	0	124	15	0	0	0	0	0	0	0	0	18	0	0
rna-XM_001950320.2	LOC100165441	GTP-binding protein Rheb homolog	0	0	0	0	0	0	0	0	0	0	0	0	0	0	0
MSTRG.13178.11	#N/A	#N/A	276	7	7	3	0	14	2	0	20	1	2	2	3	2	66
rna-XM_029492299.1	LOC100574499	uncharacterized LOC100574499	0	57	61	68	0	83	0	0	97	18	14	74	0	88	48
rna-XM_001952315.5	LOC100164890	g1/S-specific cyclin-D2-like	365	441	813	535	453	364	393	722	414	334	240	230	560	281	473
MSTRG.8521.1	#N/A	#N/A	334	87	16	16	25	466	61	14	9	14	284	171	9	10	9
rna-XM_003248684.4	LOC100571887	fatty acid synthase-like	0	8	44	10	25	10	54	52	17	41	4	0	24	0	87
MSTRG.23525.1	#N/A	#N/A	8	28	9	0	12	7	12	6	3	8	4	10	4	9	4
rna-XM_016805978.2	LOC103309955	#N/A	25	1	18	0	0	52	0	0	0	0	0	0	0	0	0
MSTRG.16732.2	#N/A	#N/A	0	0	265	399	0	0	0	0	396	660	0	197	0	0	0
MSTRG.9334.2	#N/A	#N/A	821	1215	1448	3373	2954	846	1107	1607	3477	2244	971	2	1068	3193	3055
rna-XM_016803511.2	LOC100575729	uncharacterized LOC100575729	47	0	2	0	0	0	0	0	0	0	0	39	0	0	0
rna-XM_003247256.4	LOC100572078	uncharacterized LOC100572078	9	4	19	50	139	18	5	32	96	57	14	14	64	19	49
rna-XR_003838759.1	LOC100161874	uncharacterized LOC100161874	0	0	0	0	0	0	0	0	0	0	0	0	0	0	0
rna-XM_001949369.5	LOC100166535	inward rectifier potassium channel 2-like	236	216	299	923	625	52	239	330	758	671	181	339	320	529	1198
rna-XM_016800336.2	LOC100164962	uncharacterized LOC100164962	58	63	27	7	56	145	0	64	47	0	0	34	33	7	0
rna-XM_008182093.1	LOC103308550	#N/A	3	4	8	0	1	1	4	1	4	5	0	3	0	1	4
rna-XM_029490269.1	LOC100168379	collagen alpha-2(IV) chain-like	0	49	0	0	0	0	45	0	0	107	16	0	0	0	0
rna-XM_001943051.5	LOC100165376	lanC-like protein 3 homolog	241	389	375	911	663	258	349	550	427	428	295	356	247	833	713
MSTRG.8804.3	#N/A	#N/A	24	6	2	10	4	6	6	9	3	2	9	4	2	0	6
MSTRG.8804.2	#N/A	#N/A	30	9	4	7	5	3	10	9	2	2	7	12	1	0	6
rna-XM_003240949.4	LOC100572202	protein KRTCAP2 homolog	423	604	826	1105	949	506	553	804	1139	439	524	507	660	1154	987
MSTRG.8063.2	#N/A	#N/A	348	480	221	544	663	237	158	414	884	349	87	249	148	709	793
MSTRG.8063.3	#N/A	#N/A	267	346	393	860	632	255	371	357	780	475	253	388	279	956	662
rna-XM_001942557.5	LOC100160317	exocyst complex component 4-like	718	846	892	1512	873	656	706	997	1335	734	522	616	541	985	1390
MSTRG.21971.1	#N/A	#N/A	0	4	0	0	15	0	2	0	0	229	0	0	0	0	0
rna-XM_029487745.1	LOC100162541	uridine 5'-monophosphate synthase-like	515	245	1248	1070	71	356	287	557	811	446	819	0	245	1085	225
MSTRG.12824.3	#N/A	#N/A	388	10	129	54	196	1	4	133	213	417	9	1	83	599	89
rna-XM_016806274.1	LOC107884375	#N/A	0	0	0	0	0	0	0	0	0	0	0	0	0	0	0
rna-XM_016806841.1	LOC100167250	putative fatty acyl-CoA reductase CG8306-like	1143	977	1793	1498	1689	1671	684	209	4902	2681	1014	809	2054	1807	3407
MSTRG.14969.1	#N/A	#N/A	26	19	0	0	0	19	10	0	0	0	20	15	0	0	4
rna-XM_029485307.1	LOC100168694	glucose dehydrogenase [acceptor]-like	0	0	0	0	0	0	0	0	0	16	0	0	0	0	6
MSTRG.1728.1	#N/A	#N/A	14	28	23	17	10	17	17	24	18	2	20	16	24	14	11
MSTRG.20326.4	#N/A	#N/A	122	71	200	0	77	204	0	178	954	0	1	0	0	0	0
rna-XM_029491824.1	LOC107884062	#N/A	0	0	0	0	0	0	0	0	0	0	0	0	0	0	0
rna-XM_029490401.1	LOC107883259	#N/A	0	0	0	0	0	0	0	0	0	0	0	0	0	0	0
rna-XM_001948312.5	LOC100161446	cytosolic carboxypeptidase 6-like	5	0	0	14	7	5	0	0	10	5	0	5	0	0	14
MSTRG.20326.7	#N/A	#N/A	311	260	154	253	68	294	605	381	127	109	0	264	743	64	216
rna-XM_016807019.2	LOC100160955	voltage-dependent calcium channel type D subunit alpha-1-like	0	0	0	0	0	0	0	0	0	0	0	0	0	0	0
rna-NM_001162948.1	Hsc70-3	heat shock protein cognate 3	22	7456	2421	2537	21677	2942	7569	8920	1559	2	24286	1987	21674	648	512
MSTRG.7617.1	#N/A	#N/A	18	19	0	0	2	33	4	0	11	0	2	2	5	9	0
rna-XM_008187597.3	LOC100166874	ATP-binding cassette sub-family G member 4-like	0	0	0	0	0	0	0	0	8	0	0	0	0	0	0
rna-XM_016800608.2	LOC100569246	uncharacterized LOC100569246	18	26	29	42	28	23	22	30	29	19	34	26	24	23	28
rna-XM_003241414.4	LOC107882139	#N/A	60	30	23	181	101	13	119	10	145	149	86	98	96	124	150
MSTRG.21971.2	#N/A	#N/A	288	155	89	174	171	140	122	292	157	241	310	240	319	273	211
MSTRG.22665.1	#N/A	#N/A	0	0	1	3	0	0	0	0	5	1	16	0	0	8	0
rna-NM_001162749.2	LOC100165835	stearoyl-coa desaturase-like	11424	8457	4757	3803	4064	12019	7345	3119	4028	3002	7764	7639	3820	3951	3455
MSTRG.84.1	#N/A	#N/A	6	0	9	5	2	15	1	0	0	0	7	0	7	0	5
rna-XM_016804792.2	LOC100169461	alpha-tubulin N-acetyltransferase-like	1779	134	61	78	134	179	118	77	123	76	181	170	70	45	79
MSTRG.13462.6	#N/A	#N/A	0	185	0	8	14	12	23	1	18	318	0	0	0	11	1
rna-NM_001293544.1	LOC100169462	v-type proton ATPase subunit B-like	15440	12393	8310	11559	10107	13754	10789	8736	12685	5302	15159	11798	7992	10397	9873
rna-XM_029492474.1	LOC100167430	chorion peroxidase-like	52	87	14	21	27	10	0	12	1	20	64	31	29	41	0
rna-XM_008189282.3	LOC100161771	acyl-coenzyme A thioesterase 9, mitochondrial-like	0	0	77	0	24	138	4	1	62	15	0	0	4	3	57
MSTRG.13438.1	#N/A	#N/A	38	15	0	0	0	38	4	0	0	0	72	8	4	0	4
MSTRG.20618.1	#N/A	#N/A	0	4	6	19	21	6	0	6	4	0	2	10	3	24	6
MSTRG.6351.1	#N/A	#N/A	83	610	402	1750	102	229	227	473	2747	142	157	193	456	2295	379
MSTRG.6351.2	#N/A	#N/A	6	23	34	2971	70	6	33	51	1609	16	25	50	52	1233	106
MSTRG.934.1	#N/A	#N/A	16	19	20	52	48	21	28	25	36	13	46	41	12	32	0
rna-XM_029492442.1	LOC100166820	neural-cadherin-like	245	421	683	426	1068	213	315	881	318	716	451	180	414	258	492
rna-XM_008181793.3	LOC100167394	uncharacterized LOC100167394	2374	3629	3758	5933	4834	2227	2825	3732	5797	3905	2249	1888	1710	5016	4297
rna-XR_510729.3	LOC100576003	possible pseudogene or miscRNA, No KEGG entry	0	0	7	0	0	15	0	6	0	0	2	0	0	0	0
MSTRG.24339.1	#N/A	#N/A	0	0	4	2	0	0	0	0	0	17	0	0	0	0	0
MSTRG.12295.6	#N/A	#N/A	252	67	0	241	223	1	73	55	0	34	264	24	0	269	0
rna-XM_001948043.5	LOC100161779	CD63 antigen-like	215	90	11	43	186	222	0	7	31	3	157	0	23	23	107
MSTRG.12295.4	#N/A	#N/A	0	245	0	19	0	57	0	0	22	0	0	0	11	19	0
rna-XM_016805376.2	LOC107884036	#N/A	0	0	0	0	0	0	0	0	0	0	0	0	0	0	0
rna-XM_016801710.2	LOC107882791	#N/A	5	7	0	12	11	0	3	0	5	6	8	0	7	13	15
rna-XR_001680277.2	LOC107885013	#N/A	0	0	0	0	0	0	0	0	0	0	0	0	0	0	0
MSTRG.5786.1	#N/A	#N/A	0	2	4	11	24	0	0	12	13	19	6	3	0	21	5
rna-XM_008184209.1	LOC103309252	#N/A	0	0	0	0	0	0	0	0	0	0	0	0	0	0	0
rna-XR_001679139.2	LOC103308790	#N/A	12	24	0	0	0	0	8	0	0	10	50	9	0	36	45
rna-XM_029489226.1	LOC100572756	limulus clotting factor C-like	2	0	0	0	0	1	0	0	2	0	1	0	0	0	0
MSTRG.24298.2	#N/A	#N/A	17	23	75	24	0	68	166	0	39	22	42	74	0	17	23
rna-XM_008185970.1	LOC103309738	#N/A	0	0	0	0	0	0	1	0	0	0	0	0	0	0	0
rna-XM_008185031.3	LOC100575633	uncharacterized LOC100575633	251	138	65	109	283	206	70	103	0	133	131	107	103	14	232
MSTRG.20804.1	#N/A	#N/A	3	14	24	25	6	18	1	17	51	23	7	2	35	31	25
rna-XM_001945452.4	LOC100163524	tyrosine-protein phosphatase non-receptor type 11, tyrosine-protein phosphatase corkscrew-like	1200	1928	1411	1621	797	1559	1244	243	178	1759	1425	28	1299	992	1465
MSTRG.10740.1	#N/A	#N/A	0	0	13	0	0	0	0	0	0	0	0	0	0	0	0
rna-NM_001293459.1	LOC100169098	pre-mRNA-splicing factor SPF27-like	1114	1315	320	1271	1149	601	1033	786	713	519	583	1197	915	672	657
MSTRG.2877.1	#N/A	#N/A	6	11	7	5	6	7	3	7	6	5	3	6	3	1	4
MSTRG.8765.1	#N/A	#N/A	0	0	0	20	0	0	0	0	4	0	0	0	0	0	3
rna-XM_029492599.1	LOC100571541	uncharacterized LOC100571541	2	5	2	0	7	5	0	0	0	0	5	0	0	0	10
MSTRG.12506.1	#N/A	#N/A	127	137	184	235	222	130	81	153	125	124	115	65	97	142	148
MSTRG.12506.2	#N/A	#N/A	130	186	164	234	185	129	125	393	236	114	130	103	139	217	267
rna-XM_008181070.3	LOC103308153	#N/A	167	337	203	96	118	175	269	300	91	308	158	197	232	111	194
rna-XM_008183572.3	LOC100159191	zinc finger protein 271-like	0	0	0	0	0	0	0	0	0	0	0	0	0	0	0
MSTRG.22671.1	#N/A	#N/A	4	0	7	2	6	4	4	12	2	10	2	2	10	10	4
rna-XM_029487022.1	LOC100168365	YTH domain family protein 1-like	309	0	522	1109	0	786	649	528	0	479	576	0	0	0	0
MSTRG.2954.1	#N/A	#N/A	0	0	0	0	4	0	0	0	1	12	0	0	0	4	4
rna-XM_001949557.5	LOC100159219	protein TSSC1-like	128	180	243	75	203	57	169	177	209	209	188	176	262	112	170
rna-NM_001162636.2	LOC100161239	3'(2'),5'-bisphosphate nucleotidase 1-like	733	913	939	1316	1520	742	1133	1035	1597	752	964	952	627	1482	1465
rna-NM_001293445.1	LOC100162176	elongation of very long chain fatty acids protein 1-like	4754	663	2669	2368	1384	5563	3001	1749	3007	1358	3185	2736	1725	2350	2453
rna-XM_008191950.1	LOC100571344	possible pseudogene or miscRNA, No KEGG entry	0	0	0	0	0	0	0	0	0	0	0	0	0	0	0
rna-TRNAD-GUC-18	TRNAD-GUC	#N/A	0	0	1	0	0	0	1	0	0	0	0	0	1	0	0
rna-XM_029489218.1	LOC107884283	#N/A	0	0	0	0	0	0	0	0	0	0	0	0	0	0	0
rna-XM_001951325.5	LOC100164703	nucleoside diphosphate-linked moiety X motif 18-like	270	453	37	1188	1913	929	1	508	1	976	435	39	2	19	435
rna-XM_008189059.3	LOC100162135	regucalcin-like	1183	639	219	177	107	1236	520	362	273	251	1280	747	662	79	192
MSTRG.10466.1	#N/A	#N/A	4	3	5	23	8	4	13	4	20	2	5	1	8	2	19
rna-XM_029487163.1	LOC100161256	uncharacterized LOC100161256	0	0	0	0	0	0	0	0	0	0	0	0	0	0	0
rna-XR_003839364.1	LOC100571941	possible pseudogene or miscRNA, No KEGG entry	1	0	0	2	0	31	0	0	0	1	0	0	0	0	0
rna-NM_001162755.2	Ndufaf4	NADH dehydrogenase (ubiquinone) 1 alpha subcomplex, assembly factor 4	1484	1342	1017	1446	1783	1166	1263	896	1644	543	1461	1406	878	1128	1260
rna-XM_001946822.5	LOC100160930	uncharacterized LOC100160930	0	0	136	0	0	0	170	0	0	0	75	0	0	0	0
MSTRG.13402.3	#N/A	#N/A	0	9	0	0	7	5	11	0	0	0	4	5	0	0	0
rna-XM_001942847.5	LOC100169032	uncharacterized LOC100169032	1715	1948	2849	4268	2949	1357	2149	2972	4472	1702	1308	1874	2408	3722	3037
MSTRG.22965.1	#N/A	#N/A	0	13	0	5	0	0	0	0	0	0	4	0	0	0	0
MSTRG.21725.1	#N/A	#N/A	0	3	2	11	5	12	0	7	16	28	0	8	2	36	12
MSTRG.10465.11	#N/A	#N/A	420	203	361	286	59	344	252	267	120	186	126	10	199	246	117
MSTRG.16349.1	#N/A	#N/A	0	0	0	0	0	0	0	0	0	0	0	9	0	0	0
rna-XM_003248997.3	LOC100570678	ring canal kelch homolog	9	0	3	0	3	4	0	0	0	0	5	5	0	0	0
rna-XM_001946912.5	LOC100160431	uncharacterized LOC100160431	64	828	702	209	279	1080	1250	1	470	305	897	95	1070	2	95
MSTRG.18251.1	#N/A	#N/A	286	491	361	308	275	213	337	354	515	307	242	189	239	423	356
MSTRG.9209.1	#N/A	#N/A	55	15	5	162	242	93	10	5	173	81	44	19	4	191	221
rna-XM_001943418.5	LOC100166734	probable sodium/potassium/calcium exchanger CG1090-like	0	57	10	252	3	1	47	21	2	12	138	43	53	150	258
rna-XM_016807941.2	LOC100159492	uncharacterized LOC100159492	3	4	3	3	0	0	1	0	2	1	2	0	0	2	9
MSTRG.1032.1	#N/A	#N/A	30	60	56	123	69	71	35	39	143	31	34	72	82	109	75
rna-XR_003840091.1	LOC115034817	#N/A	25	29	35	18	45	0	17	54	34	35	31	0	34	11	0
rna-NM_001161975.1	LOC100160582	acylphosphatase, putative	210	86	30	35	203	133	64	8	131	332	188	68	29	43	109
MSTRG.21358.1	#N/A	#N/A	3	0	0	0	0	1	4	2	4	0	1	13	0	0	0
MSTRG.16281.1	#N/A	#N/A	44	0	3	88	161	26	8	12	96	89	30	10	0	53	111
rna-XM_001952408.5	LOC100164919	importin subunit alpha-3-like	2061	3564	2995	3374	2626	2195	3230	3265	3207	1768	2233	2195	3028	2705	2860
rna-XM_008183221.3	LOC100163127	putative homeodomain transcription factor-like	3090	2960	1324	3091	2880	2858	2376	2280	284	2887	2621	2209	543	2774	3104
rna-XM_001950717.4	LOC100165228	galactokinase-like	2650	1306	1033	933	1369	1923	1171	814	361	2670	1405	603	1418	622	735
MSTRG.22979.1	#N/A	#N/A	8	9	1	0	8	10	2	4	5	0	2	2	5	2	0
rna-XM_003243580.4	LOC100166361	single-minded homolog 2-like	716	1024	863	0	694	447	0	113	0	0	158	902	0	0	0
MSTRG.5699.1	#N/A	#N/A	95	66	85	109	22	100	124	126	126	64	171	119	77	86	42
MSTRG.22392.1	#N/A	#N/A	51	25	7	24	5	35	25	15	18	2	37	32	8	16	5
rna-XM_008182127.2	LOC100167928	insulin-degrading enzyme-like	394	367	692	9622	7592	6000	1202	1453	1205	2950	3090	2957	670	5100	7781
MSTRG.16544.8	#N/A	#N/A	0	0	0	1727	810	0	0	0	2312	0	0	0	0	337	0
MSTRG.16544.9	#N/A	#N/A	0	894	0	0	0	0	0	0	0	0	0	0	0	0	0
rna-NM_001160347.1	LOC100161241	potassium channel subfamily K member 9-like	277	210	73	72	667	223	90	122	74	204	383	193	132	33	187
rna-XM_001949181.4	LOC100167799	uncharacterized protein C2orf42-like	639	1004	711	1724	1480	610	624	1216	1709	744	518	822	917	1170	1527
MSTRG.16544.2	#N/A	#N/A	110	14	21	427	857	322	3	1282	55	903	1	532	0	427	791
MSTRG.9215.1	#N/A	#N/A	0	0	0	0	0	257	0	0	0	0	0	0	0	0	0
MSTRG.16544.1	#N/A	#N/A	0	0	0	23	0	0	0	0	0	0	0	0	0	64	0
MSTRG.16544.6	#N/A	#N/A	0	0	3	0	0	0	0	0	0	0	0	0	0	0	527
rna-XM_001942492.5	LOC100166209	uncharacterized LOC100166209	61	33	5	0	228	13	42	5	2	0	132	0	0	124	195
rna-XM_001952079.5	LOC100163927	ribosome biogenesis protein BOP1 homolog	6849	7556	8163	9224	7021	6059	7730	8132	9250	3620	5928	7418	8560	7261	6489
MSTRG.16544.5	#N/A	#N/A	685	6	33	20	1	0	0	10	8	430	187	0	662	122	0
rna-NM_001161961.1	LOC100160345	ubiquinone biosynthesis protein COQ9, mitochondrial-like	4355	4374	2783	1780	2731	4048	3308	2645	1510	2226	4447	3515	3119	1563	2125
MSTRG.15711.1	#N/A	#N/A	65	131	129	269	251	94	120	128	279	139	90	83	90	306	248
rna-XM_003240483.4	LOC100569169	putative tyrosine-protein phosphatase auxilin-like	277	260	416	588	373	153	124	393	525	200	198	240	311	345	440
rna-XM_008189798.3	LOC103310688	#N/A	10	13	16	21	13	37	10	16	36	37	11	2	24	4	14
MSTRG.458.4	#N/A	#N/A	22	0	21	0	0	0	1	0	1	0	14	0	1	8	5
rna-XM_003246087.4	LOC100568566	uncharacterized LOC100568566	14	0	0	4	2	0	2	12	0	8	0	0	0	0	0
MSTRG.458.1	#N/A	#N/A	1	9	6	41	3	12	34	27	57	34	4	23	49	45	45
MSTRG.458.3	#N/A	#N/A	0	0	0	0	0	0	0	17	20	5	0	0	0	0	0
MSTRG.458.2	#N/A	#N/A	5	9	17	2	14	0	0	22	0	0	0	0	0	6	6
MSTRG.17561.1	#N/A	#N/A	5	11	36	22	7	5	7	13	37	43	12	26	30	22	24
rna-XM_001948301.4	LOC100162366	protein LSM14 homolog A-like	17	7949	127	11245	7698	19	7471	2	1	1	8487	2	2	8010	8342
rna-XM_001942765.5	LOC100163756	s-adenosylmethionine synthase-like	19	0	0	0	74	0	0	0	0	0	0	0	0	0	0
rna-XM_029489147.1	LOC100573953	ring canal kelch homolog	0	0	0	31	0	0	0	50	39	0	0	0	0	0	0
rna-XM_016805470.2	LOC100160770	collagen type IV alpha-3-binding protein	88	1171	0	481	176	0	178	75	123	1436	204	496	271	527	0
rna-XM_008183311.1	LOC100570954	possible pseudogene or miscRNA, No KEGG entry	0	0	0	0	0	0	0	0	0	0	0	0	0	0	0
rna-XM_016807184.2	LOC100162634	uncharacterized LOC100162634	329	283	651	1082	1055	1466	0	435	0	1264	1044	299	430	7	0
MSTRG.11388.5	#N/A	#N/A	220	0	692	0	0	0	0	0	450	12	0	0	0	0	0
rna-XM_029491731.1	LOC115034501	#N/A	0	0	0	0	0	0	0	0	0	0	0	0	0	0	0
rna-XM_029492698.1	LOC115035061	#N/A	0	0	0	0	0	0	0	0	0	0	0	0	0	0	1
MSTRG.22791.1	#N/A	#N/A	7	11	9	38	20	22	14	19	0	9	9	7	17	38	8
rna-XM_029492561.1	LOC115034958	#N/A	0	0	0	7	0	0	0	0	0	0	0	0	5	0	0
rna-XM_008187693.3	LOC100168576	dual specificity protein phosphatase 3-like	174	92	233	59	24	0	257	142	167	29	102	109	0	107	313
rna-XM_016807207.2	LOC100161231	down syndrome cell adhesion molecule	0	0	27	0	0	0	0	0	0	0	0	0	0	0	0
rna-XM_016808883.1	LOC107885277	#N/A	0	0	0	0	0	0	0	0	0	0	0	0	0	0	0
[truncated: 60,310 more rows]

## Sheet: normalized_gene_count_matrix
gene_id	LOC#	gene name	F1_1	F1_2	F1_3	F1_4	F1_YA	F2_1	F2_2	F2_3	F2_4	F2_YA	F3_1	F3_2	F3_3	F3_4	F3_YA
[truncated: 25,125 more rows]

[truncated: 1 more sheets: normalized_transcript_count_mtx]
